# Supplementary material for: Proteomic identification of the UDP-GlcNAc: PI α1–6 GlcNAc-transferase subunits of the glycosylphosphatidylinositol biosynthetic pathway of Trypanosoma brucei
Source: PubMed Central journal article supplement (PMC7971885; doi:10.1371/journal.pone.0244699), 2021-03-18
Supplement: pone.0244699.s001.pdf [file pone.0244699.s001.pdf]

```

GPI3      MG-----FNIAMLCDFYFQLGVE
PIGA      MACRGGAGNGHRASATLSRVSPGSLYTCRTRTHNICMVSDFFYPNMGGVE
TbGPI3    MR-----RHRVAVVSDFFYPGFGGVE
          *                               . . . . . :***** :****

GPI3      FHIYHLSQKLIDLGHSSVVIITHAYKDRVGRHLTNGLKVYHVPFFVIF--
PIGA      SHIYQLSQCLIERGHKVIIVTHAYGNRKGIRYLTSGLKVYYLPLKVMY--
TbGPI3    VHIYSLGQCLMRRGHKVIVITRAYGDTGCVRYLTNGMKVYYLPLMAVKLP
          *** *. * * : **.*:::*** : *:*:*.*:***::* : .

GPI3      -RETFPTVFSTFFPIRNILLREQIQIVHSHGSASTFAHEGILHANTMGL
PIGA      -NQSTATTLFHSPLRLRYIFVRERVTIHSHSSFSAMAHDALFHAKTMGL
TbGPI3    AGSVTLPTMYLTFATMRSIFIRERITVVHGHQNTSNLCHEALFHAGTLGL
          . * .*: :. :* *::***: :*. * . * .*: :*** *:*

GPI3      RTVFTDHSLYGFNNLTSIWVNKLLTFTLTNIDRVICVSNTCENMIVRTE
PIGA      QTVFTDHSLFGFADVSSVLTNKLTVSLCDTNHICVSYTSKENTVLRRA
TbGPI3    KTCFTDHSLFGFADVSSIHINKVCEWSLRNVDQVICVSNTSRENTVLRRA
          :* *****:* :*: : ** : * : :*:*** *:* :*:

GPI3      LSPDIISVIPNAVVSDFKPRDPTGG--TKRKQSRDKIVIVVIGRLFPNK
PIGA      LNPEIVSVIPNAVDPDFTDFDPDF-----RRHDSITIVVVSRLVYRK
TbGPI3    IDPQRVSVIPNATDCSFFTPDDMKYKSWASKVENEGTLIVVIGRLVYRK
          :.* :*****. *. * . : :*.***:*. *

GPI3      GSDLLTRIIPKVCSSHEDVEFIVAGDGPKFIDFQQMIESHRLQKRVQLLG
PIGA      GIDLDSGIIPELCQKYPDLNFIIGGEGPKRIILEEVRERYQLHDRVRLLG
TbGPI3    GSDLFVDVIPEICKRHPNIRWIVGGDGPRRSQFQQMIERHDLMDRVKMLG
          * ** : **::* . : :*:*.***: :*: * : * .***:***

GPI3      SVPHEKVRDVLQCGDIYLHASLTEAFGTILVEAASCNLLIVTQVGGIPE
PIGA      ALEHKDVRNVLVQGHIFLNTSLTEAFCAIVEAASCGLQVVSTRVGGIPE
TbGPI3    SLPHSGVRNVLIQGGIIFLNCSLTEAFICIALIEAASCGLLCVSTRVGGVPE
          : : * . **:* **.*:* :***** :*****.* *:*:***:*

GPI3      VLPNEMTVYAEQTSVSDLVQATNKAINIIRSK-ALDTSSFHDSVSKMYDW
PIGA      VLPENLIILCEP-SVKSLCEGLEKAIQKSGTLPAPENIHNVKTFYTW
TbGPI3    VLPNMLLLAEP-DPSSITLLEAIASVP---YISPWELHDNVRRFYRW
          *** : : . * . . : :** : . .:* : * *

GPI3      MDVAKRTVEIYTNISSTSSADDKDWKMKVANLYKRDGIWAKHLYLLCGIV
PIGA      RNVAERTEKVYDRVSVEAVLPMDK---RLDRLISHCGPVTGYIFALLAVF
TbGPI3    DWVAERTERVYDKIMCTKSPSLYE---RLMNYAS-VGCVYGVICWLLCIG
          **:* ** .:* . : . . * : * :

GPI3      EYMLFFLEWLWYPRDEIDLAPKW--PKKTVSNETKEARE-----T
PIGA      NFLFLIFLRWMTFDSIIDVAIDATGPRGAWTNNYSHSKRGGENNEISETR
TbGPI3    DWLMLTFLEFWFSELIDIAPDF--PLELYSRNREKLQVVGSPS-----
          :*: :* : * . **:* . * : : . . :

```

**S1 Fig. Sequence alignment of GPI3, PIGA and TbGPI3.** The alignment was generated by the Tcoffee program, \* = identical residues, : = conserved residues. GPI3, PIGA and TbGPI3 sequences are from Uniprot; GPI3 (P32363 GPI3\_YEAST) PIGA (P37287 (PIGA\_HUMAN)); TbGPI3 (Q585S5 (Q585S5\_TRYB2)).
