# Supplementary material for: Proteomic identification of the UDP-GlcNAc: PI α1–6 GlcNAc-transferase subunits of the glycosylphosphatidylinositol biosynthetic pathway of Trypanosoma brucei
Source: PLoS One. 2021 Mar 18;16(3):e0244699. doi: 10.1371/journal.pone.0244699 (PMC7971885; doi:10.1371/journal.pone.0244699)
Supplement: S1 File — (XLSX) [file pone.0244699.s003.xlsx]

## Sheet: Table_S1v2
S1 File: Total cell proteome of bloodstream form T. brucei ranked by intensit
Gene ID	BSF Intensity Log10	BSF Intensity Rank	Protein Descriptions
Tb427.BES40.22	11.1689	1	VSG221
Tb927.1.2340	10.6873	2	alpha tubulin
Tb927.1.2360	10.6873	3	alpha tubulin
Tb927.1.2380	10.6873	4	alpha tubulin
Tb927.1.2400	10.6873	5	alpha tubulin
Tb11.v5.0469	10.6713	6	beta tubulin, putative
Tb927.1.2330	10.6713	7	beta tubulin
Tb927.1.2350	10.6713	8	beta tubulin
Tb927.1.2370	10.6713	9	beta tubulin
Tb927.1.2390	10.6713	10	beta tubulin
Tb927.1.2410	10.6713	11	beta tubulin, pseudogene
Tb11.v5.0531	10.5814	12	fructose-bisphosphate aldolase, glycosomal, putative
Tb927.10.5620	10.5814	13	fructose-bisphosphate aldolase, glycosomal
Tb927.6.4280	10.4354	14	glyceraldehyde 3-phosphate dehydrogenase, glycosomal
Tb927.6.4300	10.4354	15	glyceraldehyde 3-phosphate dehydrogenase, glycosomal
Tb11.v5.1046	10.3642	16	elongation factor 1-alpha, putative
Tb927.10.2090	10.3642	17	elongation factor 1-alpha
Tb927.10.2100	10.3642	18	elongation factor 1-alpha
Tb927.10.2110	10.3642	19	elongation factor 1-alpha
Tb11.v5.0650	10.3324	20	enolase, putative
Tb927.10.2890	10.3324	21	enolase
Tb11.v5.1034	10.3072	22	heat shock protein 70 (hsp70), putative
Tb11.v5.1035	10.3072	23	heat shock protein 70 (hsp70), putative
Tb927.11.11330	10.3072	24	heat shock protein 70
Tb927.9.12570	10.2942	25	glycerol kinase, glycosomal
Tb927.9.12590	10.2942	26	glycerol kinase, glycosomal
Tb927.9.12610	10.2942	27	glycerol kinase, glycosomal
Tb927.9.12630	10.2942	28	glycerol kinase, glycosomal
Tb927.10.2020	10.2664	29	hexokinase
Tb11.v5.0543	10.1984	30	Heat shock protein 83, putative
Tb927.10.10890	10.1984	31	heat shock protein, putative
Tb927.10.10900	10.1984	32	heat shock protein, putative
Tb927.10.10910	10.1984	33	heat shock protein, putative
Tb927.10.10920	10.1984	34	heat shock protein, putative
Tb927.10.10930	10.1984	35	heat shock protein, putative
Tb927.10.10940	10.1984	36	heat shock protein, putative
Tb927.10.10950	10.1984	37	heat shock protein, putative
Tb927.10.10960	10.1984	38	heat shock protein, putative
Tb927.10.10970	10.1984	39	heat shock protein, putative
Tb927.10.10980	10.1984	40	heat shock protein 90, putative
Tb927.3.3270	10.1838	41	ATP-dependent 6-phosphofructokinase, glycosomal
Tb927.11.7460	10.1237	42	luminal binding protein 1 (BiP), putative
Tb927.11.7510	10.1237	43	luminal binding protein 1 (BiP), putative
Tb11.v5.0605	10.1075	44	pyruvate kinase 1, putative
Tb927.10.14140	10.1075	45	pyruvate kinase 1
Tb927.10.4560	10.0998	46	elongation factor 2
Tb927.10.4570	10.0998	47	elongation factor 2
Tb927.10.6400	10.0699	48	chaperonin HSP60, mitochondrial precursor
Tb927.10.6510	10.0699	49	chaperonin HSP60, mitochondrial precursor
Tb11.v5.1055	10.0261	50	73 kDa paraflagellar rod protein, putative
Tb927.3.4290	10.0261	51	Paraflagellar rod protein 1-1
Tb927.3.4300	10.0261	52	Paraflagellar rod protein 1-2
Tb927.3.4310	10.0261	53	Paraflagellar rod protein 1-3
Tb927.3.4320	10.0261	54	Paraflagellar rod protein 1-4
Tb927.3.4330	10.0261	55	Paraflagellar rod protein 1-5
Tb11.v5.0538	9.99819	56	69 kDa paraflagellar rod protein, putative
Tb927.8.4970	9.99819	57	Paraflagellar rod protein 2-1
Tb927.8.4980	9.99819	58	Paraflagellar rod protein 2-2
Tb927.8.4990	9.99819	59	Paraflagellar rod protein 2-3
Tb927.8.5000	9.99819	60	Paraflagellar rod protein 2-4
Tb927.8.5010	9.99819	61	Paraflagellar rod protein 2-5
Tb927.8.3530	9.98747	62	glycerol-3-phosphate dehydrogenase [NAD+], glycosomal
Tb10.v4.0052	9.86788	63	microtubule-associated protein 2
Tb927.1.700	9.85728	64	phosphoglycerate kinase
Tb11.v5.0197	9.84883	65	clathrin heavy chain, putative
Tb11.v5.0198	9.84883	66	clathrin heavy chain, putative
Tb927.10.6050	9.84883	67	clathrin heavy chain
Tb927.11.13020	9.83696	68	calmodulin
Tb927.11.13030	9.83696	69	calmodulin
Tb927.11.13040	9.83696	70	calmodulin
Tb927.11.13050	9.83696	71	calmodulin
Tb11.v5.0636	9.82133	72	C-terminal motor kinesin, putative
Tb927.10.14890	9.82133	73	C-terminal motor kinesin, putative
Tb927.9.13785	9.80715	74	kinetoplastid membrane protein 11-5
Tb927.9.13795	9.80715	75	kinetoplastid membrane protein 11-4
Tb927.9.13820	9.80715	76	kinetoplastid membrane protein 11-3
Tb927.9.13860	9.80715	77	kinetoplastid membrane protein 11-2
Tb927.9.13920	9.80715	78	kinetoplastid membrane protein 11-1
Tb927.5.4170	9.80454	79	histone H4, putative
Tb927.5.4180	9.80454	80	histone H4, putative
Tb927.5.4190	9.80454	81	histone H4, putative
Tb927.5.4200	9.80454	82	histone H4, putative
Tb927.5.4210	9.80454	83	histone H4, putative
Tb927.5.4220	9.80454	84	histone H4, putative
Tb927.5.4230	9.80454	85	histone H4, putative
Tb927.5.4240	9.80454	86	histone H4, putative
Tb927.5.4250	9.80454	87	histone H4, putative
Tb927.5.4260	9.80454	88	histone H4, putative
Tb927.10.10445	9.79235	89	Core histone H2A/H2B/H3/H4, putative
Tb927.10.10460	9.79235	90	histone H2B, putative
Tb927.10.10470	9.79235	91	histone H2B, putative
Tb927.10.10480	9.79235	92	histone H2B, putative
Tb927.10.10490	9.79235	93	histone H2B, putative
Tb927.10.10500	9.79235	94	histone H2B, putative
Tb927.10.10510	9.79235	95	histone H2B, putative
Tb927.10.10520	9.79235	96	histone H2B, putative
Tb927.10.10530	9.79235	97	histone H2B, putative
Tb927.10.10540	9.79235	98	histone H2B, putative
Tb927.10.10550	9.79235	99	histone H2B, putative
Tb927.10.10560	9.79235	100	histone H2B, putative
Tb927.10.10570	9.79235	101	histone H2B, putative
Tb927.10.10580	9.79235	102	histone H2B, putative
Tb927.10.10590	9.79235	103	histone H2B, putative
Tb927.10.8940	9.77856	104	flagellum targeting protein kharon1, putative
Tb927.9.6250	9.76196	105	arginine kinase
Tb927.6.3740	9.75452	106	heat shock 70 kDa protein, mitochondrial precursor, putative
Tb927.6.3750	9.75452	107	heat shock 70 kDa protein, mitochondrial precursor, putative
Tb927.6.3800	9.75452	108	heat shock 70 kDa protein, mitochondrial precursor, putative
Tb11.v5.0668	9.71254	109	protein disulfide isomerase
Tb927.10.8230	9.71254	110	protein disulfide isomerase 2
Tb927.4.5010	9.70683	111	calreticulin, putative
Tb927.8.7410	9.70683	112	calreticulin, putative
Tb927.11.9590	9.6679	113	S-adenosylhomocysteine hydrolase, putative
Tb927.7.2820	9.65798	114	histone H2A, putative
Tb927.7.2830	9.65798	115	histone H2A, putative
Tb927.7.2840	9.65798	116	histone H2A, putative
Tb927.7.2850	9.65798	117	histone H2A, putative
Tb927.7.2860	9.65798	118	histone H2A, putative
Tb927.7.2870	9.65798	119	histone H2A, putative
Tb927.7.2880	9.65798	120	histone H2A, putative
Tb927.7.2890	9.65798	121	histone H2A, putative
Tb927.7.2900	9.65798	122	histone H2A, putative
Tb927.7.2910	9.65798	123	histone H2A, putative
Tb927.7.2920	9.65798	124	histone H2A, putative
Tb927.7.2930	9.65798	125	histone H2A, putative
Tb927.7.2940	9.65798	126	histone H2A, putative
Tb927.11.880	9.65174	127	cyclophilin a
Tb927.11.11360	9.64223	128	receptor for activated C kinase 1
Tb927.11.11370	9.64223	129	receptor for activated C kinase 1
Tb927.11.2610	9.62339	130	hypothetical protein, conserved
Tb11.v5.0404	9.62193	131	hypothetical protein, conserved
Tb927.11.17000	9.62193	132	AIR9-like protein
Tb927.9.10770	9.61586	133	polyadenylate-binding protein 2
Tb927.9.2470	9.59837	134	nucleolar protein
Tb927.10.12710	9.58085	135	heat shock protein 110, putative
Tb927.9.11580	9.56218	136	glycosomal membrane protein
Tb927.11.5520	9.56208	137	triosephosphate isomerase
Tb927.10.5810	9.55983	138	The ARF-like 2 binding protein BART, putative
Tb927.4.3570	9.55777	139	translation elongation factor 1-beta, putative
Tb927.4.3590	9.55777	140	translation elongation factor 1-beta, putative
Tb927.9.4680	9.5523	141	Eukaryotic initiation factor 4A-1
Tb927.7.3550	9.52251	142	cytoskeleton associated protein, putative
Tb927.9.5770	9.51412	143	tryparedoxin peroxidase
Tb927.9.5860	9.51412	144	tryparedoxin peroxidase
Tb927.10.3990	9.51136	145	DHH1
Tb927.3.3450	9.50487	146	ADP-ribosylation factor-like protein 3, putative
Tb927.11.13500	9.4881	147	par1
Tb927.11.740	9.4843	148	eukaryotic translation initiation factor 5A
Tb11.v5.0675	9.48293	149	ubiquitin-activating enzyme E1, putative
Tb927.9.12650	9.48293	150	ubiquitin-activating enzyme E1, putative
Tb927.11.3250	9.47734	151	dynein heavy chain, putative
Tb927.11.16130	9.46674	152	nucleoside diphosphate kinase
Tb927.7.1320	9.46023	153	10 kDa heat shock protein, putative
Tb927.7.1340	9.46023	154	10 kDa heat shock protein, putative
Tb927.4.1300	9.45522	155	amidinotransferase, putative
Tb927.8.4430	9.4469	156	uridine phosphorylase
Tb927.11.13090	9.4459	157	elongation factor 1 gamma, putative
Tb927.11.13190	9.4459	158	elongation factor 1 gamma, putative
Tb927.8.1990	9.44288	159	peroxidoxin
Tb11.v5.1059	9.43663	160	40S ribosomal protein S4, putative
Tb927.11.3590	9.43663	161	40S ribosomal protein S4, putative
Tb927.11.3600	9.43663	162	40S ribosomal protein S4, putative
Tb927.11.1090	9.43577	163	calpain-like protein, putative
Tb927.11.1100	9.43577	164	cysteine peptidase, Clan CA, family C2, putative
Tb927.9.8850	9.43332	165	actin A
Tb927.9.8880	9.43332	166	actin B
Tb927.8.8330	9.42744	167	cysteine peptidase, putative
Tb927.10.1560	9.41924	168	Nucleolar protein 91
Tb927.11.2650	9.41586	169	heat shock protein 84, putative
Tb927.11.2050	9.41261	170	60S acidic ribosomal protein P0, putative
Tb927.11.2060	9.41261	171	60S acidic ribosomal protein P0, putative
Tb927.3.930	9.41133	172	dynein heavy chain, putative
Tb927.10.2010	9.40685	173	hexokinase
Tb927.1.2430	9.40256	174	histone H3, putative
Tb927.1.2450	9.40256	175	histone H3, putative
Tb927.1.2470	9.40256	176	histone H3, putative
Tb927.1.2490	9.40256	177	histone H3, putative
Tb927.1.2510	9.40256	178	histone H3, putative
Tb927.1.2530	9.40256	179	histone H3, putative
Tb927.1.2550	9.40256	180	histone H3, putative
Tb927.4.1790	9.40123	181	ribosomal protein L3, putative
Tb927.4.1800	9.40123	182	Mitochondrial ribosomal protein L3
Tb11.v5.0881	9.40044	183	antigenic protein, putative
Tb927.4.2070	9.40044	184	antigenic protein, putative
Tb927.11.9860	9.39504	185	EF-hand domain pair, putative
Tb927.10.7930	9.3885	186	2,3-bisphosphoglycerate-independent phosphoglycerate mutase
Tb11.v5.0501	9.38668	187	40S ribosomal protein S3A, putative
Tb927.10.3940	9.38668	188	40S ribosomal protein S3A, putative
Tb927.10.9570	9.3829	189	paraflagellar rod component, putative
Tb11.v5.0435	9.37068	190	adenylosuccinate synthetase, putative
Tb927.11.3650	9.37068	191	adenylosuccinate synthetase, putative
Tb927.11.8970	9.37051	192	ribose 5-phosphate isomerase, putative
Tb927.10.16120	9.36878	193	inosine-5'-monophosphate dehydrogenase
Tb927.10.3210	9.36481	194	delta-1-pyrroline-5-carboxylate dehydrogenase, putative
Tb927.3.5050	9.35733	195	60S ribosomal protein L4
Tb927.11.6870	9.33271	196	14-3-3 protein 2
Tb927.11.7380	9.33001	197	glycerol-3-phosphate dehydrogenase (FAD-dependent), mitochondrial
Tb927.7.2650	9.328	198	hypothetical protein, conserved
Tb927.1.3830	9.32777	199	glucose-6-phosphate isomerase, glycosomal
Tb11.v5.0243	9.31992	200	40S ribosomal protein S18, putative
Tb11.v5.1060	9.31992	201	40S ribosomal protein S18, putative
Tb927.10.5330	9.31992	202	40S ribosomal protein S18, putative
Tb927.10.5340	9.31992	203	40S ribosomal protein S18, putative
Tb927.8.1870	9.31971	204	Golgi/lysosome glycoprotein 1
Tb927.11.1900	9.31589	205	T-complex protein 1, beta subunit, putative
Tb11.v5.0411	9.31344	206	peptidylprolyl isomerase-like protein, putative
Tb927.10.16100	9.31344	207	FK506-binding protein (FKBP)-type peptidyl-prolyl isomerase, putative
Tb927.10.15760	9.30996	208	hypothetical protein, conserved
Tb927.11.9530	9.30498	209	14-3-3 protein 1
Tb927.10.7090	9.2938	210	Alternative oxidase, mitochondrial
Tb927.11.16280	9.27621	211	60S ribosomal protein L8, putative
Tb927.5.1110	9.27621	212	60S ribosomal protein L8, putative
Tb927.11.11965	9.27076	213	cytoskeleton-associated protein, putative
Tb927.11.11975	9.27076	214	cytoskeleton-associated protein, putative
Tb927.11.11980	9.27076	215	cytoskeleton-associated protein 15
Tb11.v5.0820	9.26089	216	branched-chain amino acid aminotransferase, putative
Tb927.2.4590	9.26089	217	branched-chain amino acid aminotransferase, putative
Tb927.2.4610	9.26089	218	branched-chain amino acid aminotransferase, putative
Tb927.10.11300	9.25713	219	paraflagellar rod component, putative
Tb927.9.7520	9.25206	220	hypothetical protein, conserved
Tb927.8.1330	9.25071	221	60S ribosomal protein L7a, putative
Tb927.8.1340	9.25071	222	60S ribosomal protein L7a, putative
Tb927.8.6660	9.23799	223	paraflagellar rod component, putative
Tb11.v5.0797	9.23679	224	flagellar calcium-binding protein
Tb11.v5.0798	9.23679	225	flagellar calcium-binding protein
Tb927.8.5440	9.23679	226	flagellar calcium-binding 24 kDa protein
Tb927.8.5460	9.23679	227	Flagellar calcium-binding 44 kDa protein
Tb927.8.5465	9.23679	228	flagellar calcium-binding 24 kDa protein
Tb927.8.5470	9.23679	229	flagellar calcium-binding 24 kDa protein
Tb927.2.4210	9.23523	230	Phosphoenolpyruvate carboxykinase [ATP], glycosomal
Tb927.10.11540	9.23431	231	40S ribosomal protein S3, putative
Tb927.9.6070	9.23431	232	40S ribosomal protein S3, putative
Tb927.10.5770	9.2304	233	Valosin-containing protein
Tb927.9.5690	9.22965	234	60S acidic ribosomal protein, putative
Tb927.3.3310	9.2295	235	60S ribosomal protein L13, putative
Tb927.3.3320	9.2295	236	60S ribosomal protein L13, putative
Tb927.6.5070	9.22745	237	hypothetical protein, conserved
Tb927.9.8070	9.22678	238	QM-like protein
Tb927.9.8420	9.22678	239	QM-like protein
Tb927.1.120	9.2259	240	retrotransposon hot spot protein 4 (RHS4), putative
Tb927.10.11390	9.22293	241	60S ribosomal protein L6, putative
Tb927.8.3150	9.22101	242	T-complex protein 1, gamma subunit, putative
Tb11.v5.0561	9.22037	243	fatty acyl CoA synthetase, putative
Tb927.9.4210	9.22037	244	fatty acyl CoA synthetase 3
Tb11.01.1680.v5	9.2182	245	polyubiquitin, putative
Tb11.v5.0537	9.2182	246	polyubiquitin, putative
Tb927.11.9920	9.2182	247	polyubiquitin, putative
Tb927.11.1840	9.21626	248	hypothetical protein, conserved
Tb927.10.190	9.2118	249	40S ribosomal protein S6, putative
Tb927.5.1210	9.21155	250	short-chain dehydrogenase, putative
Tb927.9.11270	9.21085	251	t- complex protein 1 (eta subunit), putative
Tb927.3.1120	9.20993	252	GTP-binding nuclear protein rtb2, putative
Tb11.v5.0265	9.20976	253	Thioredoxin-like, putative
Tb927.7.4520	9.20976	254	Thioredoxin-like, putative
Tb927.3.4070	9.20612	255	Pyruvate transporter, putative
Tb927.4.2080	9.20594	256	Coiled-coil and C2 domain-containing protein
Tb927.5.2940	9.20555	257	stress-induced protein sti1, putative
Tb927.7.710	9.20515	258	heat shock 70 kDa protein, putative
Tb927.8.6390	9.20454	259	lysophospholipase, putative
Tb927.3.2960	9.20345	260	inosine-adenosine-guanosine-nucleosidehydrolase
Tb927.11.14000	9.20209	261	nuclear RNA binding domain 1
Tb927.11.14020	9.20209	262	nuclear RNA binding domain 2
Tb11.v5.0825	9.20018	263	fatty acyl CoA synthetase, putative
Tb927.10.3260	9.20018	264	Long-chain-fatty-acid--CoA ligase 5 (EC 6.2.1.3) (Long-chain acyl-CoA synthetase 5) (LACS 5), putative
Tb927.9.15110	9.19851	265	60S ribosomal protein L5, putative
Tb927.9.15170	9.19851	266	60S ribosomal protein L5, putative
Tb927.3.3760	9.19738	267	tryparedoxin 1b, putative
Tb927.3.3780	9.19738	268	tryparedoxin 1a, putative
Tb927.6.4140	9.19336	269	paraflagellar rod component, putative
Tb927.10.14600	9.19256	270	40S ribosomal protein S2, putative
Tb927.10.14710	9.19256	271	40S ribosomal protein S2, putative
Tb927.4.2450	9.18724	272	protein disulfide isomerase 1
Tb11.v5.0360	9.18342	273	aminopeptidase, putative
Tb927.11.6590	9.18342	274	metallo-peptidase, Clan MF, Family M17
Tb927.1.3180	9.18039	275	40S ribosomal protein S11, putative
Tb927.10.8190	9.17798	276	T-complex protein 1, theta subunit, putative
Tb927.11.14250	9.17326	277	T-complex protein 1, epsilon subunit, putative
Tb927.10.5610	9.17175	278	40S ribosomal protein S9, putative
Tb927.8.1110	9.17175	279	40S ribosomal protein S9, putative
Tb11.v5.0516	9.17074	280	glyceraldehyde 3-phosphate dehydrogenase, cytosolic, putative
Tb927.10.6880	9.17074	281	glyceraldehyde 3-phosphate dehydrogenase, cytosolic
Tb927.11.3240	9.16979	282	T-complex protein 1, zeta subunit, putative
Tb927.8.2540	9.16884	283	3-ketoacyl-CoA thiolase
Tb927.10.1100	9.16758	284	60S ribosomal protein L9, putative
Tb927.6.4690	9.16758	285	60S ribosomal protein L9, putative
Tb927.9.7770	9.16689	286	spermidine synthase
Tb927.11.2430	9.16579	287	Cytoplasmic dynein 2 heavy chain (DYNC2H2), putative
Tb927.3.3580	9.16576	288	heat shock protein 90, putative
Tb927.11.10790	9.15982	289	40S ribosomal protein SA, putative
Tb927.11.10910	9.15982	290	40S ribosomal protein SA, putative
Tb927.7.1730	9.15748	291	60S ribosomal protein L7, putative
Tb927.7.1740	9.15748	292	60S ribosomal protein L7, putative
Tb927.7.1750	9.15748	293	60S ribosomal protein L7, putative
Tb927.4.2740	9.1574	294	p25-alpha, putative
Tb11.0560	9.15142	295	hypothetical protein, conserved
Tb11.v5.0858	9.15142	296	hypothetical protein, conserved
Tb927.10.1170	9.15142	297	intraflagellar transport protein 172
Tb927.10.6070	9.1433	298	universal minicircle sequence binding protein 1
Tb927.4.560	9.14105	299	Cytoplasmic dynein 2 heavy chain (DYNC2H1), putative
Tb927.10.3840	9.13707	300	60S ribosomal protein L18a, putative
Tb927.11.14130	9.13707	301	ribosomal protein L18, putative
Tb11.0880	9.13594	302	chrXI additional, unordered contigs
Tb927.11.680	9.13594	303	ribosomal protein L21E (60S), putative
Tb927.4.1100	9.13594	304	ribosomal protein L21E (60S), putative
Tb927.5.3400	9.1351	305	calcium-translocating P-type ATPase
Tb927.1.4310	9.13443	306	Flagellum attachment zone protein 2
Tb927.11.11820	9.12808	307	40S ribosomal protein S17, putative
Tb927.11.11830	9.12808	308	40S ribosomal protein S17, putative
Tb11.v5.0414	9.12595	309	ATP-dependent DEAD/H RNA helicase, putative
Tb927.10.540	9.12595	310	ATP-dependent RNA helicase SUB2, putative
Tb927.8.6110	9.12533	311	3-hydroxy-3-methylglutaryl-CoA synthase, putative
Tb927.9.11380	9.12266	312	60S ribosomal protein L23, putative
Tb927.9.11410	9.12266	313	60S ribosomal protein L23, putative
Tb927.4.2030	9.12219	314	DNA/RNA-binding protein Alba 4
Tb927.3.1380	9.12182	315	ATP synthase subunit beta, mitochondrial
Tb927.3.2600	9.11631	316	ATP-dependent DEAD/H RNA helicase, putative
Tb927.9.13650	9.11501	317	ADP-ribosylation factor, putative
Tb927.9.13655	9.11501	318	ADP-ribosylation factor, putative
Tb927.9.13680	9.11501	319	ADP-ribosylation factor, putative
Tb927.9.13710	9.11501	320	ADP-ribosylation factor, putative
Tb927.9.13740	9.11501	321	ADP-ribosylation factor, putative
Tb11.v5.0587	9.10955	322	protein kinase A regulatory subunit
Tb927.11.4610	9.10955	323	protein kinase A regulatory subunit
Tb927.10.5840	9.10928	324	translation elongation factor 1-beta, putative
Tb927.11.760	9.10817	325	protein phosphatase 2C, putative
Tb927.11.11250	9.10461	326	cytosolic malate dehydrogenase
Tb927.8.890	9.10293	327	Ras-related protein Rab1A
Tb927.10.13500	9.10037	328	60S ribosomal protein L10a
Tb927.11.9710	9.10037	329	60S ribosomal protein L10a, putative
Tb927.10.1060	9.10009	330	T-complex protein 1, delta subunit, putative
Tb927.8.1550	9.09876	331	paraflagellar rod component, putative
Tb927.11.16760	9.09602	332	T-complex protein 1, alpha subunit, putative
Tb927.10.8430	9.0945	333	40S ribosomal protein S12, putative
Tb11.0290	9.0893	334	chrXI additional, unordered contigs
Tb11.0390	9.0893	335	chrXI additional, unordered contigs
Tb927.11.7705	9.0893	336	ribosomal protein S11, putative
Tb927.6.4980	9.0893	337	40S ribosomal protein S14
Tb927.8.6030	9.08013	338	60S ribosomal protein L12, putative
Tb927.9.14000	9.08013	339	60S ribosomal protein L12, putative
Tb927.11.1430	9.07888	340	Component of motile flagella 2
Tb927.3.1010	9.07803	341	hypothetical protein, conserved
Tb927.7.1300	9.0776	342	protein disulfide isomerase, putative
Tb927.10.7410	9.06238	343	succinyl-CoA ligase [GDP-forming] beta-chain, putative
Tb927.11.900	9.06091	344	isocitrate dehydrogenase, putative
Tb927.7.2980	9.05998	345	Nitroreductase family, putative
Tb927.7.3020	9.05998	346	Nitroreductase family, putative
Tb927.7.4060	9.05822	347	cysteine peptidase, Clan CA, family C2, putative
Tb927.6.2790	9.05618	348	L-threonine 3-dehydrogenase
Tb927.11.1980	9.0543	349	zinc finger protein family member, putative
Tb927.9.13380	9.0536	350	Autophagy-related protein 24
Tb927.9.3920	9.04872	351	ribosomal protein S7, putative
Tb927.9.3990	9.04872	352	ribosomal protein S7, putative
Tb927.11.11010	9.04532	353	hypothetical protein, conserved
Tb927.10.1510	9.0445	354	CCR4-NOT transcription complex subunit 1
Tb927.11.11230	9.04447	355	60S ribosomal protein L14, putative
Tb927.6.720	9.04447	356	40S ribosomal protein L14, putative
Tb927.10.13517	9.04097	357	40S ribosomal protein S27-like, putative
Tb927.8.4780	9.04031	358	Flagellar Member 3
Tb927.3.4760	9.03913	359	dynamin-1-like protein
Tb927.2.5160	9.03749	360	chaperone protein DnaJ, putative
Tb927.3.3560	9.03616	361	U-box domain containing protein, putative
Tb927.5.1810	9.03481	362	lysosomal/endosomal membrane protein p67
Tb927.5.1830	9.03481	363	lysosomal/endosomal membrane protein p67
Tb927.10.15550	9.03285	364	hypothetical protein, conserved
Tb927.11.6300	9.03039	365	40S ribosomal protein S5, putative
Tb927.10.15120	9.02817	366	40S ribosomal protein S13, putative
Tb927.2.5910	9.02817	367	40S ribosomal protein S13, putative
Tb927.7.1040	9.02575	368	40S ribosomal protein S16, putative
Tb927.7.1050	9.02575	369	40S ribosomal protein S16, putative
Tb927.8.6060	9.02575	370	2-amino-3-ketobutyrate coenzyme A ligase
Tb927.11.4700	9.0249	371	prostaglandin f synthase
Tb927.7.5170	9.02385	372	60S ribosomal protein L25
Tb927.7.5180	9.02385	373	60S ribosomal protein L23a, putative
Tb927.4.3550	9.02281	374	60S ribosomal protein L13a, putative
Tb927.5.1610	9.02281	375	60S ribosomal protein L13a, putative
Tb11.v5.0713	9.02202	376	Retrotransposon hot spot protein 6 (RHS6), putative
Tb927.4.190	9.02202	377	retrotransposon hot spot protein (RHS, pseudogene), putative
Tb927.3.5180	9.01972	378	ADF/Cofilin
Tb927.7.2340	9.01907	379	40S ribosomal protein S15, putative
Tb927.7.2370	9.01907	380	40S ribosomal protein S15, putative
Tb927.6.2360	9.0179	381	adenosine kinase, putative
Tb927.2.5980	9.01692	382	chaperone protein ClpB1, putative
Tb927.10.4110	9.01467	383	60S ribosomal protein L30
Tb927.10.4120	9.01467	384	60S ribosomal protein L30
Tb927.10.2440	9.01456	385	Metacaspase-4
Tb927.4.3740	9.01207	386	flagellar attachment zone protein 1
Tb927.11.7170	9.01185	387	seryl-tRNA synthetase
Tb927.9.8100	9.01088	388	nascent polypeptide associated complex subunit, putative
Tb927.9.8130	9.01088	389	nascent polypeptide associated complex subunit, putative
Tb11.v5.0270	9.01006	390	nucleoside hydrolase, putative
Tb927.7.4570	9.01006	391	inosine-guanine nucleoside hydrolase
Tb927.11.15880	9.00937	392	60S ribosomal protein L27, putative
Tb927.11.15900	9.00937	393	60S ribosomal protein L27, putative
Tb927.10.12820	9.0084	394	hypothetical protein, conserved
Tb11.0845	9.00334	395	dynein light chain LC8, putative
Tb927.11.18680	9.00334	396	dynein light chain LC8, putative
Tb927.11.715	9.00334	397	dynein light chain LC8, putative
Tb927.11.5440	9.0033	398	NADP-dependent malic enzyme, cytosolic
Tb927.11.4450	9.00198	399	ALBA-Domain Protein
Tb927.8.7100	9.00117	400	acetyl-CoA carboxylase
Tb927.10.7330	9.00117	401	40S ribosomal protein S24E, putative
Tb927.10.7340	9.00117	402	40S ribosomal protein S24E, putative
Tb927.10.13790	8.99972	403	hypothetical protein, conserved
Tb927.8.2070	8.99902	404	Present in the outer mitochondrial membrane proteome 39-1
Tb927.8.2270	8.99902	405	Present in the outer mitochondrial membrane proteome 39-3
Tb927.11.550	8.99763	406	Suppressor of clathrin deficiency 6, putative
Tb927.11.11690	8.99695	407	Vacuolar proton pump subunit B, putative
Tb927.4.1080	8.99551	408	V-type ATPase, A subunit, putative
Tb927.8.6150	8.99483	409	40S ribosomal protein S8, putative
Tb927.8.6160	8.99483	410	40S ribosomal protein S8, putative
Tb927.10.3660	8.99451	411	aspartate aminotransferase
Tb927.10.14500	8.98883	412	hypothetical protein, conserved
Tb927.7.3330	8.9869	413	Flagellar attachment zone protein 10
Tb927.4.1860	8.98564	414	ribosomal protein S19, putative
Tb927.10.12680	8.98359	415	60S ribosomal protein L34, putative
Tb927.11.9730	8.98359	416	60S ribosomal protein L34, putative
Tb927.2.340	8.9828	417	retrotransposon hot spot protein 4 (RHS4), putative
Tb927.11.3310	8.97275	418	ubiquitin-conjugating enzyme, putative
Tb927.2.100	8.97157	419	retrotransposon hot spot protein 1 (RHS1), putative
Tb927.7.1110	8.96976	420	asparagine synthetase a, putative
Tb927.10.3370	8.96907	421	60S acidic ribosomal protein P2, putative
Tb927.10.3380	8.96907	422	60S acidic ribosomal protein P2, putative
Tb927.11.11680	8.96772	423	2-oxoglutarate dehydrogenase E2 component, putative
Tb927.7.7420	8.96336	424	ATP synthase F1, alpha subunit
Tb927.7.7430	8.96336	425	ATP synthase F1, alpha subunit
Tb927.2.4230	8.95836	426	NUP-1 protein, putative
Tb11.v5.0263	8.95699	427	PX domain containing protein, putative
Tb927.7.4500	8.95699	428	PX domain containing protein, putative
Tb927.1.3950	8.94543	429	alanine aminotransferase
Tb927.3.1840	8.94344	430	3-oxo-5-alpha-steroid 4-dehydrogenase, putative
Tb927.7.3440	8.94327	431	I/6 autoantigen
Tb927.9.5900	8.94055	432	glutamate dehydrogenase
Tb927.11.7560	8.94024	433	Component of motile flagella 15
Tb927.10.8020	8.93952	434	prolyl endopeptidase
Tb927.11.14090	8.93571	435	Double RNA binding domain protein 18
Tb927.11.3570	8.93393	436	metallo-peptidase, Clan MA(E) Family M1
Tb927.10.10140	8.93389	437	paraflagellar rod component, putative
Tb927.10.720	8.93117	438	Flagellum attachment zone protein 24
Tb11.v5.0199	8.92817	439	universal minicircle sequence binding protein, putative
Tb927.10.6060	8.92817	440	universal minicircle sequence binding protein 2
Tb927.9.9860	8.92745	441	170 kDa glucose-regulated protein, putative
Tb927.11.3730	8.91953	442	leucyl-tRNA synthetase, putative
Tb927.10.5360	8.91665	443	40S ribosomal protein S10, putative
Tb927.10.5370	8.91665	444	40S ribosomal protein S10, putative
Tb927.8.6240	8.9158	445	STOP axonemal protein
Tb927.10.14150	8.91576	446	nuclear segregation protein, putative
Tb927.10.12700	8.91561	447	pyruvate dehydrogenase E1 alpha subunit, putative
Tb927.11.15370	8.9136	448	Importin subunit beta-4, putative
Tb927.5.1340	8.91161	449	pre-mRNA splicing factor, putative
Tb927.10.14820	8.91017	450	Mitochondrial ADP/ATP carrier protein 5c
Tb927.10.14830	8.91017	451	Mitochondrial ADP/ATP carrier protein 5b
Tb927.10.14840	8.91017	452	Mitochondrial ADP/ATP carrier protein 5a
Tb11.v5.0525	8.91013	453	hypothetical protein, conserved
Tb927.10.2640	8.91013	454	intraflagellar transport protein 81
Tb927.3.2230	8.90841	455	succinyl-CoA synthetase alpha subunit, putative
Tb927.10.1590	8.90839	456	ribosomal protein L36, putative
Tb927.9.15210	8.90839	457	ribosomal protein L36, putative
Tb927.11.14190	8.90832	458	Staphylococcal nuclease homologue/Tudor domain containing protein, putative
Tb927.9.5040	8.9039	459	cAMP-specific phosphodiesterase
Tb927.10.10390	8.90247	460	trypanothione reductase
Tb927.9.7110	8.9012	461	GRAM domain containing protein, putative
Tb927.3.3490	8.90069	462	High mobility group protein TDP1
Tb927.3.3750	8.90049	463	paraflagellar rod component, putative
Tb927.6.4670	8.90037	464	MORN repeat-containing protein 1
Tb11.v5.0160	8.89747	465	cyclophilin-type peptidyl-prolyl cis-trans isomerase, putative
Tb927.7.4770	8.89747	466	cyclophilin-type peptidyl-prolyl cis-trans isomerase, putative
Tb927.9.10100	8.89723	467	SET domain-containing protein, putative
Tb927.11.16730	8.89629	468	dihydrolipoyl dehydrogenase
Tb927.10.9880	8.8949	469	60S ribosomal protein L18, putative
Tb927.11.4300	8.8949	470	60S ribosomal protein L18, putative
Tb927.9.10230	8.8913	471	Co-chaperone protein P23
Tb927.11.11520	8.89076	472	glycosomal membrane protein
Tb927.6.3650	8.8904	473	ADP-ribosylation factor-like protein 3C, putative
Tb927.6.5120	8.88982	474	60S acidic ribosomal protein P2, putative
Tb927.6.5130	8.88982	475	60S acidic ribosomal protein P2, putative
Tb927.7.4700	8.88939	476	WD domain, G-beta repeat, putative
Tb927.1.2670	8.88925	477	paralyzed flagella 16
Tb927.10.2840	8.8877	478	ribosomal protein S25, putative
Tb927.3.1370	8.8877	479	40S ribosomal protein S25, putative
Tb927.9.13990	8.8875	480	RNA-binding protein, putative
Tb927.8.1180	8.88569	481	vacuolar-type Ca2+-ATPase 1
Tb927.11.6180	8.88349	482	60S ribosomal protein L28, putative
Tb927.11.6200	8.88349	483	60S ribosomal protein L28, putative
Tb927.6.5040	8.87989	484	ribosomal protein L15, putative
Tb927.3.1790	8.87974	485	pyruvate dehydrogenase E1 beta subunit, putative
Tb927.1.2100	8.87824	486	Calpain-like protein 1.1
Tb927.9.12110	8.87764	487	6-phosphogluconate dehydrogenase, decarboxylating
Tb11.v5.0181	8.87642	488	60S ribosomal protein L19, putative
Tb11.v5.0182	8.87642	489	60S ribosomal protein L19, putative
Tb927.7.5000	8.87642	490	60S ribosomal protein L19, putative
Tb927.7.5020	8.87642	491	60S ribosomal protein L19, putative
Tb927.10.12890	8.8754	492	bifunctional aminoacyl-tRNA synthetase, putative
Tb927.5.3800	8.86983	493	glutamine hydrolysing (not ammonia-dependent) carbomoyl phosphate synthase, putative
Tb11.v5.0420	8.86937	494	hypothetical protein, conserved
Tb927.10.14490	8.86937	495	hypothetical protein, conserved
Tb11.v5.0718	8.86844	496	protein kinase, putative
Tb927.10.13780	8.86844	497	Glycogen synthase kinase 3 short
Tb927.6.4480	8.86513	498	valyl-tRNA synthetase, putative
Tb927.9.5320	8.86031	499	nucleolar RNA binding protein, putative
Tb927.10.12510	8.85832	500	P-type H+-ATPase, putative
Tb11.v5.0761	8.85691	501	proteasome activator protein pa26, putative
Tb927.10.3710	8.85691	502	proteasome activator protein PA26
Tb927.10.10850	8.85639	503	Protein argonaute-1
Tb927.2.2510	8.85466	504	Mitochondrial outer membrane protein porin 1
Tb927.2.2520	8.85466	505	Mitochondrial outer membrane protein porin 2
Tb927.11.14880	8.85408	506	Paraflagellar Rod Proteome Component 9, putative
Tb927.6.1030	8.84928	507	cysteine peptidase, Clan CA, family C1, Cathepsin L-like
Tb927.6.1040	8.84928	508	cysteine peptidase, Clan CA, family C1, Cathepsin L-like
Tb927.10.2240	8.84581	509	RNA binding protein
Tb927.9.12510	8.84485	510	ATP-dependent DEAD/H RNA helicase, putative
Tb11.v5.0741	8.84093	511	hypothetical protein, conserved
Tb927.3.3770	8.84093	512	paraflagellar rod component, putative
Tb927.3.3790	8.84093	513	hypothetical protein, conserved
Tb927.9.13070	8.83943	514	Heat shock factor binding 1 domain-containing protein
Tb927.9.11470	8.83807	515	60S ribosomal protein L29
Tb927.9.11490	8.83807	516	60S ribosomal protein L29
Tb927.6.4840	8.83737	517	S-adenosylmethionine synthetase
Tb927.6.4850	8.83737	518	S-adenosylmethionine synthetase
Tb927.6.4860	8.83737	519	S-adenosylmethionine synthetase
Tb927.6.4870	8.83737	520	S-adenosylmethionine synthetase
Tb927.6.4880	8.83737	521	S-adenosylmethionine synthetase
Tb927.6.4890	8.83737	522	S-adenosylmethionine synthetase
Tb927.6.4900	8.83737	523	S-adenosylmethionine synthetase
Tb927.6.4910	8.83737	524	S-adenosylmethionine synthetase
Tb927.6.4920	8.83737	525	S-adenosylmethionine synthetase
Tb927.8.2030	8.83143	526	Posterior and Ventral Edge protein 1
Tb11.v5.0261	8.83072	527	adenosine 5'-monophosphoramidase, putative
Tb927.7.4480	8.83072	528	adenosine 5'-monophosphoramidase, putative
Tb927.4.2180	8.82776	529	60S ribosomal protein L35a, putative
Tb927.11.6140	8.82498	530	40S ribosomal protein S15A, putative
Tb927.3.4360	8.82498	531	40S ribosomal protein S15A, putative
Tb927.7.6090	8.82292	532	eukaryotic translation initiation factor 3 subunit a
Tb927.2.4710	8.82184	533	RNA-binding protein, putative
Tb927.3.3300	8.82113	534	Flagellum attachment zone protein 19
Tb927.11.720	8.82024	535	hypothetical protein, conserved
Tb927.8.2640	8.8202	536	ubiquitin-activating enzyme E1, putative
Tb927.11.6460	8.81679	537	hypothetical protein, conserved
Tb927.11.4950	8.81659	538	hypothetical protein, conserved
Tb927.11.9980	8.8131	539	2-oxoglutarate dehydrogenase E1 component, putative
Tb927.7.3370	8.81297	540	Intraflagellar transport protein 74, putative
Tb927.8.3750	8.81266	541	nucleolar protein 56
Tb927.5.1000	8.81116	542	ubiquitin-conjugating enzyme E2, putative
Tb10.v4.0035	8.81048	543	stress-inducible protein STI1-like, putative
Tb11.v5.0757	8.81048	544	stress-inducible protein STI1-like, putative
Tb927.10.4450	8.81048	545	stress-inducible protein STI1-like, putative
Tb927.4.1270	8.80941	546	ruvB-like DNA helicase, putative
Tb927.11.9700	8.80358	547	transcription factor BTF3, putative
Tb927.4.4380	8.80269	548	Pyrophosphate-energized vacuolar membrane proton pump 1
Tb927.8.7980	8.80269	549	Pyrophosphate-energized vacuolar membrane proton pump 2, putative
Tb927.10.14550	8.80203	550	ATP-dependent RNA helicase HEL67
Tb927.11.4460	8.80012	551	ALBA-Domain Protein
Tb927.9.5190	8.79963	552	proliferative cell nuclear antigen (PCNA), putative
Tb927.11.12530	8.79335	553	Flagellum attachment zone protein 3
Tb927.6.1000	8.79309	554	cysteine peptidase, Clan CA, family C1, Cathepsin L-like
Tb927.6.1050	8.79309	555	cysteine peptidase, Clan CA, family C1, Cathepsin L-like
Tb927.6.1060	8.79309	556	cysteine peptidase, Clan CA, family C1, Cathepsin L-like
Tb927.6.990	8.79309	557	cysteine peptidase, Clan CA, family C1, Cathepsin L-like
Tb927.4.2000	8.79015	558	ruvB-like DNA helicase, putative
Tb927.6.1880	8.7872	559	aspartyl-tRNA synthetase, putative
Tb927.6.4770	8.78717	560	protein mkt1, putative
Tb927.11.2470	8.78585	561	metallo-peptidase, Clan MF, Family M17
Tb927.9.6560	8.78478	562	NAK family pseudokinase, putative
Tb927.10.2530	8.7806	563	adenylate kinase, putative
Tb927.9.11540	8.78017	564	hypothetical protein, conserved
Tb927.11.11220	8.78007	565	dynein heavy chain, putative
Tb927.4.760	8.77928	566	AP-1 adapter complex gamma subunit, putative
Tb927.9.7590	8.77858	567	60S ribosomal protein L11, putative
Tb927.9.7620	8.77858	568	60S ribosomal protein L11, putative
Tb927.8.3250	8.77588	569	dynein heavy chain, putative
Tb927.7.5790	8.77152	570	protein disulfide isomerase, putative
Tb10.v4.0109	8.76971	571	variant surface glycoprotein (VSG, pseudogene), putative
Tb11.v5.0241	8.76743	572	dynein heavy chain, putative
Tb11.v5.0242	8.76743	573	dynein heavy chain, putative
Tb927.10.5350	8.76743	574	dynein heavy chain, putative
Tb927.7.7460	8.76472	575	hypothetical protein, conserved
Tb927.11.6440	8.76204	576	hypothetical protein, conserved
Tb927.11.11475	8.76196	577	ribosomal protein S14p/S29e
Tb927.11.11725	8.76196	578	ribosomal protein S14p/S29e
Tb927.7.4180	8.75936	579	Fatty acid elongase
Tb11.v5.0615	8.75909	580	hypothetical protein, conserved
Tb927.10.7230	8.75909	581	Flagellar Member 1
Tb05.5K5.150	8.7579	582	small GTP-binding protein, putative
Tb927.5.4500	8.7579	583	ras-like small GTPase, putative
Tb05.5K5.30	8.75776	584	serine/threonine protein phosphatase, putative
Tb927.5.4380	8.75776	585	Kinetoplastid-specific Protein Phosphatase 1
Tb927.4.2040	8.75639	586	DNA/RNA-binding protein Alba 3
Tb927.6.400	8.75495	587	peptidase M20/M25/M40, putative
Tb927.6.3840	8.75489	588	reticulon domain protein
Tb927.9.9100	8.75298	589	hypothetical protein, conserved
Tb927.11.7080	8.75177	590	acidocalcisomal pyrophosphatase
Tb927.7.6910	8.75151	591	Phosphatidylinositol 4-phosphate 5-kinase, putative
Tb927.11.1020	8.7492	592	ribokinase, putative
Tb11.v5.0810	8.7484	593	glutamyl-tRNA synthetase, putative
Tb927.6.4590	8.7484	594	glutamyl-tRNA synthetase, putative
Tb927.3.4680	8.746	595	RAB GDP dissociation inhibitor alpha, putative
Tb927.11.5000	8.74428	596	Dynein intermediate chain 1, axonemal
Tb927.5.1090	8.7429	597	threonyl-tRNA synthetase, putative
Tb927.11.1450	8.73695	598	2-oxoglutarate dehydrogenase E1 component, putative
Tb927.11.7675	8.73648	599	ribosomal protein S10p/S20
Tb927.11.7685	8.73648	600	ribosomal protein S10p/S20
Tb927.5.800	8.73604	601	casein kinase I, isoform 2
Tb927.11.15910	8.73591	602	iron superoxide dismutase
Tb927.4.870	8.7335	603	dynein heavy chain, putative
Tb927.10.14980	8.73313	604	intraflagellar transport protein 52
Tb927.10.14790	8.73232	605	metallo-peptidase, Clan MG, Family M24
Tb927.8.2520	8.7297	606	acetyl-CoA synthetase, putative
Tb927.8.2790	8.7297	607	acetyl-CoA synthetase, truncated
Tb927.5.3810	8.72786	608	orotidine-5-phosphate decarboxylase/orotate phosphoribosyltransferase, putative
Tb927.6.1570	8.72638	609	2-hydroxy-3-oxopropionate reductase, putative
Tb05.5K5.130	8.72541	610	paraflagellar rod component par4, putative
Tb927.5.4480	8.72541	611	paraflagellar rod component par4, putative
Tb927.11.9640	8.72351	612	glycyl-tRNA synthetase, putative
Tb927.11.5450	8.72332	613	malic enzyme
Tb11.v5.0196	8.72305	614	Proteasome subunit A N-terminal signature/Proteasome subunit, putative
Tb927.10.6030	8.72305	615	proteasome subunit alpha type-1, putative
Tb927.10.270	8.72255	616	60S ribosomal protein L32, putative
Tb927.9.15420	8.72255	617	60S ribosomal protein L32
Tb05.5K5.110	8.72204	618	major vault protein, putative
Tb927.5.4460	8.72204	619	major vault protein, putative
Tb927.9.12200	8.72066	620	60S ribosomal subunit protein L31, putative
Tb927.9.12240	8.72066	621	60S ribosomal subunit protein L31, putative
Tb927.7.1130	8.71812	622	trypanothione/tryparedoxin dependent peroxidase 2
Tb927.7.1140	8.71812	623	trypanothione/tryparedoxin dependent peroxidase 3
Tb927.11.1740	8.71693	624	intraflagellar transport protein 88
Tb11.1220	8.71644	625	hypothetical protein
Tb11.v5.0996	8.71644	626	hypothetical protein, conserved
Tb927.10.15250	8.71644	627	paraflagellar rod component, putative
Tb927.10.13630	8.71561	628	glucosidase, putative
Tb927.8.6750	8.71494	629	translationally controlled tumor protein (TCTP), putative
Tb927.11.10540	8.71371	630	hypothetical protein, conserved
Tb11.v5.0558	8.71351	631	oligosaccharyl transferase subunit, putative
Tb11.v5.0559	8.71351	632	oligosaccharyl transferase subunit, putative
Tb927.5.900	8.71351	633	oligosaccharyl transferase subunit, putative
Tb927.5.910	8.71351	634	oligosaccharyl transferase subunit, putative
Tb927.1.2750	8.70924	635	hypothetical protein, conserved
Tb927.9.10310	8.70838	636	mitochondrial carrier protein 11
Tb927.11.13250	8.70553	637	eukaryotic translation initiation factor 2 gamma, putative
Tb927.3.2810	8.70415	638	hypothetical protein, conserved
Tb927.6.4500	8.70232	639	conserved repeat domain containing protein, putative
Tb927.9.7720	8.70166	640	predicted tetratricopeptide repeat protein
Tb927.10.9190	8.69999	641	isoleucyl-tRNA synthetase, putative
Tb927.1.3800	8.69975	642	Present in the outer mitochondrial membrane proteome 18
Tb927.9.8740	8.69522	643	Double RNA binding domain protein 3
Tb927.9.9550	8.69428	644	conserved protein, unknown function
Tb11.v5.0254	8.68936	645	pantothenate kinase subunit, putative
Tb927.11.7290	8.68936	646	pantothenate kinase subunit, putative
Tb927.9.8950	8.68853	647	metallo- peptidase, Clan M- Family M48
Tb927.3.5620	8.6871	648	Facilitates chromatin transcription complex subunit spt16
Tb927.11.8200	8.68681	649	ribosomal protein S26, putative
Tb927.4.2530	8.68575	650	hypothetical protein, conserved
Tb927.9.5150	8.68555	651	ribosomal protein S6, putative
Tb927.10.1080	8.68529	652	40S ribosomal protein S23, putative
Tb927.10.1090	8.68529	653	40S ribosomal protein S23, putative
Tb927.7.2240	8.68456	654	hypothetical protein, conserved
Tb927.3.5220	8.68232	655	hypothetical protein, conserved
Tb927.6.2200	8.68089	656	DJ-1 family protein, putative
Tb927.11.7020	8.67683	657	proteasome alpha 7 subunit, putative
Tb927.10.4180	8.67441	658	TFIIF-stimulated CTD phosphatase, putative
Tb927.7.6770	8.67419	659	Acyl CoA binding protein, putative
Tb927.1.220	8.67377	660	retrotransposon hot spot protein 1 (RHS1), putative
Tb927.6.4370	8.67332	661	eukaryotic translation initiation factor 3 subunit d
Tb927.11.1990	8.67236	662	arginyl-tRNA synthetase, putative
Tb927.11.12850	8.67121	663	oligopeptidase b
Tb927.11.2500	8.67036	664	Metallocarboxypeptidase 1
Tb927.2.3030	8.67006	665	ATP-dependent Clp protease subunit, heat shock protein 78 (HSP78), putative
Tb927.6.3500	8.66811	666	endosomal trafficking protein RME-8, putative
Tb927.3.2100	8.66808	667	hypothetical protein, conserved
Tb927.8.5240	8.66576	668	Domain of unknown function DUF221, putative
Tb927.8.4540	8.66574	669	PAB1-binding protein , putative
Tb927.7.230	8.66569	670	40S ribosomal protein S33, putative
Tb927.7.240	8.66569	671	40S ribosomal protein S33, putative
Tb927.2.5060	8.66503	672	GTP binding protein, putative
Tb927.1.2570	8.66343	673	coatomer beta subunit
Tb927.9.15360	8.66224	674	40S ribosomal protein S6, putative
Tb927.6.950	8.66203	675	cysteinyl-tRNA synthetase, putative
Tb927.10.8980	8.66174	676	hypothetical protein, conserved
Tb927.11.2360	8.65961	677	phenylalanyl-tRNA synthetase (beta subunit), putative
Tb927.10.7700	8.65906	678	ATP-binding cassette protein subfamily G
Tb927.11.7840	8.658	679	ribonucleoside-diphosphate reductase large chain
Tb927.3.3190	8.65773	680	Serine/threonine-protein kinase NEK7, putative
Tb927.2.5660	8.65629	681	adenylate kinase, putative
Tb927.3.5490	8.65479	682	Putative intraflagellar transport protein B2
Tb927.7.3410	8.65376	683	centrin-4
Tb927.11.9400	8.65325	684	hypothetical protein, conserved
Tb927.11.1890	8.65217	685	Serine-threonine kinase receptor-associated protein, putative
Tb11.v5.0653	8.64979	686	trypanothione synthetase, putative
Tb927.2.4370	8.64979	687	trypanothione synthetase
Tb927.6.1800	8.6484	688	protein phosphatase 2C, putative
Tb927.6.4000	8.64685	689	small glutamine-rich tetratricopeptide repeat protein, putative
Tb11.v5.0774	8.64637	690	dihydrolipoamide acetyltransferase precursor, putative
Tb927.10.7570	8.64637	691	dihydrolipoamide acetyltransferase E2 subunit, putative
Tb927.10.230	8.64585	692	proteasome subunit alpha type-5, putative
Tb927.5.2570	8.6457	693	eukaryotic translation initiation factor 3 subunit b
Tb927.3.3130	8.645	694	Present in the outer mitochondrial membrane proteome 24
Tb927.11.3490	8.6446	695	hypothetical protein, conserved
Tb927.2.2770	8.64418	696	hypothetical protein, conserved
Tb927.10.450	8.64352	697	Component of motile flagella 62
Tb927.5.630	8.64214	698	acidic phosphatase, putative
Tb11.v5.0868	8.64059	699	mitotubule-associated protein Gb4, putative
Tb927.9.2520	8.64059	700	microtubule-associated protein
Tb927.9.15460	8.63984	701	calcium motive p-type ATPase, putative
Tb927.11.15140	8.63823	702	bilobe region protein, putative
Tb927.10.2370	8.63721	703	Lupus La protein homolog, putative
Tb05.5K5.200	8.63524	704	guanine deaminase, putative
Tb11.v5.0409	8.63524	705	guanine deaminase, putative
Tb927.5.4560	8.63524	706	guanine deaminase, putative
Tb927.3.5020	8.62897	707	Flagellar Member 6
Tb927.4.450	8.62797	708	coatomer alpha subunit, putative
Tb927.8.4330	8.62749	709	small GTP-binding protein Rab11
Tb927.2.2440	8.62654	710	proteasome regulatory non-ATPase subunit 6
Tb11.v5.0877	8.62638	711	eukaryotic translation initiation factor 3 subunit 8, putative
Tb927.10.8270	8.62638	712	eukaryotic translation initiation factor 3 subunit c
Tb927.10.8290	8.62638	713	eukaryotic translation initiation factor 3 subunit c
Tb927.7.3740	8.6252	714	SUMO-interacting motif-containing protein
Tb927.2.6000	8.62441	715	glycosylphosphatidylinositol-specific phospholipase C
Tb927.10.14030	8.62382	716	hypothetical protein, conserved
Tb927.6.4440	8.6236	717	RNA-binding protein 42 (RNA-binding motif protein 42)
Tb927.1.190	8.62274	718	retrotransposon hot spot protein (RHS, pseudogene), putative
Tb927.2.5270	8.62149	719	dynein heavy chain, putative
Tb927.11.15100	8.61764	720	Tb5.20
Tb927.8.7750	8.61696	721	hypothetical protein, conserved
Tb927.9.9780	8.61684	722	peptidyl-prolyl cis-trans isomerase (cyclophilin- 40), putative
Tb927.11.1560	8.61669	723	1,2-Dihydroxy-3-keto-5-methylthiopentene dioxygenase, putative
Tb927.3.5520	8.61653	724	26S proteasome regulatory non-ATPase subunit
Tb927.10.220	8.61591	725	60S ribosomal protein L37a, putative
Tb927.10.6370	8.61591	726	60S ribosomal proteins L37, putative
Tb927.3.5060	8.61528	727	Ankyrin repeats (many copies)/Ankyrin repeats (3 copies), putative
Tb927.8.3560	8.61483	728	DNA repair and recombination helicase protein PIF5
Tb927.5.1460	8.61477	729	Possible lysine decarboxylase, putative
Tb927.3.4750	8.61234	730	Aminopeptidase M1, putative
Tb927.3.4790	8.61234	731	Aminopeptidase M1, putative
Tb927.10.14630	8.61124	732	fibrillarin, putative
Tb927.10.14750	8.61124	733	fibrillarin, putative
Tb927.11.13780	8.61105	734	profilin
Tb927.5.1160	8.61028	735	Degradation arginine-rich protein for mis-folding, putative
Tb11.v5.0698	8.6082	736	dynein heavy chain, putative
Tb927.7.920	8.6082	737	Inner arm dynein 5-1
Tb927.10.390	8.60667	738	DUF2407 ubiquitin-like domain containing protein, putative
Tb927.8.5100	8.60526	739	hypothetical protein, conserved
Tb927.10.14580	8.60482	740	60S ribosomal protein L17, putative
Tb927.11.4820	8.60482	741	60S ribosomal protein L17, putative
Tb927.6.700	8.6037	742	alanyl-tRNA synthetase, putative
Tb927.7.7040	8.60358	743	methylthioadenosine phosphorylase, putative
Tb927.8.1510	8.60231	744	ATP-dependent RNA helicase DBP2B, putative
Tb927.11.14100	8.60181	745	Double RNA-binding domain containing protein 4
Tb927.11.8160	8.60172	746	dynein heavy chain, putative
Tb927.10.14700	8.5991	747	hypothetical protein, conserved
Tb927.11.13230	8.59855	748	VAMP-associated protein, putative
Tb927.3.3000	8.5952	749	Putative intraflagellar transport protein C3
Tb927.11.10920	8.59076	750	hypothetical protein, conserved
Tb927.9.5210	8.59066	751	glutaminyl-tRNA synthetase, putative
Tb927.8.4580	8.59061	752	Basal body protein
Tb927.10.8040	8.59012	753	beta adaptin, putative
Tb927.9.11600	8.5893	754	glycosomal membrane protein
Tb927.9.8990	8.58858	755	Ankyrin repeats (3 copies), putative
Tb927.11.11900	8.58829	756	Coatomer subunit gamma
Tb927.10.290	8.58673	757	proteasome alpha 2 subunit, putative
Tb927.6.4020	8.58356	758	hypothetical protein, conserved
Tb927.5.1300	8.58245	759	V-type proton ATPase subunit a, putative
Tb927.11.3270	8.58232	760	squalene monooxygenase, putative
Tb927.10.12590	8.58204	761	hypothetical protein, conserved
Tb927.11.14300	8.5797	762	Dynein intermediate chain, axonemal
Tb927.4.3060	8.57677	763	hypothetical protein, conserved
Tb927.4.2310	8.57505	764	asparaginyl-tRNA synthetase, putative
Tb11.v5.0231	8.57417	765	75 kDa invariant surface glycoprotein, putative
Tb927.5.360	8.57417	766	75 kDa invariant surface glycoprotein
Tb11.v5.0684	8.57271	767	eukaryotic translation initiation factor 5, putative
Tb927.10.2770	8.57271	768	eukaryotic translation initiation factor 5, putative
Tb927.11.10760	8.57194	769	kinesin-D
Tb05.5K5.70	8.57171	770	nucleolar RNA helicase II, putative
Tb927.5.4420	8.57171	771	nucleolar RNA helicase II, putative
Tb927.9.9290	8.57123	772	polyadenylate-binding protein 1
Tb11.v5.0464	8.57	773	vesicular-fusion protein nsf, putative
Tb927.1.1560	8.57	774	vesicular-fusion protein nsf, putative
Tb11.v5.0365	8.5693	775	hypothetical protein, conserved
Tb927.1.2260	8.5691	776	small myristoylated protein 1-2
Tb927.11.16830	8.56904	777	Rab-like 5, small G protein
Tb927.10.1500	8.56813	778	methionyl-tRNA synthetase, putative
Tb927.8.2740	8.56796	779	mitochondrial RNA binding protein
Tb927.3.2900	8.56618	780	eukaryotic translation initiation factor 2 subunit alpha
Tb927.11.4480	8.56463	781	Flagellar radial spoke protein 4/6
Tb927.8.3100	8.56462	782	coronin, putative
Tb927.2.2160	8.5637	783	paraflagellar rod component, putative
Tb11.v5.0337	8.56353	784	hypothetical protein, conserved
Tb927.10.5380	8.56353	785	intraflagellar transport protein 122
Tb927.8.810	8.56333	786	radial spoke protein RSP9, putative
Tb927.10.6800	8.5621	787	developmentally regulated GTP-binding protein, putative
Tb927.9.8000	8.56094	788	ubiquitin-protein ligase, putative
Tb927.10.14470	8.56052	789	intraflagellar transport protein 140
Tb927.7.3630	8.55972	790	TPR-repeat-containing chaperone protein DNAJ, putative
Tb927.11.260	8.55947	791	Putative intraflagellar transport protein F6
Tb927.5.2090	8.55901	792	kinesin, putative
Tb927.11.7350	8.5574	793	Histone H2B variant V
Tb927.6.2640	8.55721	794	importin alpha subunit, putative
Tb927.11.15480	8.5562	795	heat shock protein Hsp20, putative
Tb927.10.2190	8.55472	796	Protein of unknown function (DUF667), putative
Tb927.4.3450	8.54837	797	Mitochondrial ATP synthase subunit, putative
Tb927.7.4420	8.54783	798	proteasome alpha 3 subunit, putative
Tb927.7.3180	8.53897	799	adaptor complex AP-1 medium subunit, putative
Tb927.10.11080	8.5369	800	paraflagellar rod protein
Tb927.6.1770	8.53647	801	kinesin, putative
Tb927.5.3450	8.53611	802	eukaryotic translation initiation factor eIF2A, putative
Tb11.v5.0641	8.53551	803	major vault protein, putative
Tb927.10.1990	8.53551	804	major vault protein, putative
Tb927.7.6360	8.53513	805	histone H2A variant Z
Tb927.11.6170	8.53238	806	protein transport protein SEC31, putative
Tb927.8.980	8.53235	807	phosphoacetylglucosamine mutase
Tb11.0890	8.5319	808	epsin, putative
Tb927.11.670	8.5319	809	epsinR
Tb927.8.3770	8.53021	810	Mitogen-activated protein kinase 10, putative
Tb927.6.4320	8.52776	811	Protein of unknown function (DUF2817), putative
Tb927.3.5340	8.52647	812	Hsc70-interacting protein (Hip), putative
Tb927.1.1670	8.52593	813	ARM-like helical domain-containing protein
Tb927.11.3740	8.52487	814	proteasome regulatory ATPase subunit 2
Tb927.9.9060	8.52454	815	Lsm12 protein, putative
Tb927.10.5030	8.52422	816	ubiquitin/ribosomal protein S27a, putative
Tb927.7.3680	8.52422	817	ubiquitin/ribosomal protein S27a, putative
Tb927.8.6760	8.52366	818	translationally-controlled tumor protein homolog, putative
Tb927.6.1090	8.52344	819	proteasome regulatory ATPase subunit 3
Tb927.9.1750	8.52055	820	Fibronectin type III domain containing protein, putative
Tb11.v5.0540	8.52019	821	amino acid transporter 8, putative
Tb927.4.4820	8.52019	822	amino acid transporter 10, putative
Tb927.4.4860	8.52019	823	amino acid transporter 8, putative
Tb927.9.6290	8.51886	824	arginine kinase
Tb927.10.8930	8.51802	825	paraflagellar rod component, putative
Tb927.10.5460	8.51728	826	60S ribosomal protein L24, putative
Tb927.10.5480	8.51728	827	60S ribosomal protein L24, putative
Tb927.11.10690	8.51705	828	hypothetical protein, conserved
Tb11.v5.0589	8.51693	829	Clusterin-associated protein-1, putative
Tb927.3.1110	8.51693	830	Putative intraflagellar transport protein A1
Tb927.9.1810	8.51684	831	60S ribosomal protein L35, putative
Tb927.9.1850	8.51684	832	60S ribosomal protein L35, putative
Tb927.11.6370	8.51445	833	leucine-rich repeat protein (LRRP), putative
Tb11.v5.0871	8.5129	834	hypothetical protein, conserved
Tb927.8.1170	8.5129	835	eukaryotic translation initiation factor 3 subunit h
Tb927.8.1190	8.5129	836	eukaryotic translation initiation factor 3 subunit h
Tb927.8.2630	8.51252	837	kinesin-C
Tb927.9.4190	8.51168	838	fatty acyl CoA syntetase 1
Tb927.7.2550	8.5113	839	proteasome regulatory ATPase subunit 5
Tb927.2.4580	8.51098	840	UNC119
Tb927.8.6430	8.51044	841	hypothetical protein, conserved
Tb927.10.12960	8.50912	842	Ras-related protein Rab5A
Tb927.7.3980	8.50899	843	tc40 antigen-like
Tb927.9.11000	8.50885	844	ras-related protein RAB7, putative
Tb927.11.3380	8.50728	845	Ran-binding protein 1, putative
Tb927.7.2190	8.50728	846	translocon-associated protein (TRAP), alpha subunit, putative
Tb927.11.9420	8.50686	847	ATP synthase, putative
Tb927.11.15990	8.50674	848	Nucleoporin NUP109
Tb927.9.5730	8.50383	849	nucleosome assembly protein-like protein
Tb927.7.1780	8.50363	850	Adenine phosphoribosyltransferase, putative
Tb927.10.13720	8.50301	851	RNA-binding protein 29, putative
Tb927.1.4830	8.50095	852	phospholipase A1
Tb927.4.4700	8.50061	853	hypothetical protein, conserved
Tb927.9.14480	8.49954	854	dynein-associated protein, putative
Tb927.10.13280	8.49887	855	hypothetical protein, conserved
Tb927.6.2170	8.49846	856	co-chaperone GrpE, putative
Tb11.v5.1057	8.49659	857	protein kinase, putative
Tb927.10.12040	8.49659	858	mitogen-activated protein kinase 11, putative
Tb927.10.13710	8.49629	859	Activator of Hsp90 ATPase, N-terminal/Activator of Hsp90 ATPase homolog 1-like protein, putative
Tb927.8.2080	8.49395	860	Fungal tRNA ligase phosphodiesterase domain containing protein, putative
Tb927.11.3230	8.49313	861	60S ribosomal protein L44
Tb927.2.6090	8.49313	862	60S ribosomal protein L44
Tb927.7.1920	8.49001	863	paraflagellar rod component, putative
Tb927.5.930	8.48971	864	NADH-dependent fumarate reductase
Tb927.10.1450	8.48891	865	plectin, putative
Tb927.8.5600	8.48723	866	transaldolase, putative
Tb927.9.10010	8.48586	867	chaperone protein DnaJ, putative
Tb927.10.10730	8.48577	868	RNA Interference Factor 5
Tb927.10.11310	8.48569	869	intraflagellar transport protein 57/55
Tb927.3.1590	8.48558	870	mitochondrial RNA binding complex 1 subunit
Tb927.10.2730	8.48296	871	START domain containing protein, putative
Tb927.11.8440	8.48231	872	haloacid dehalogenase-like hydrolase, putative
Tb927.5.1820	8.48212	873	60S acidic ribosomal protein, putative
Tb927.10.1390	8.48183	874	Hypoxanthine-guanine-xanthine phosphoribosyltransferase
Tb927.10.14780	8.47758	875	Canertinib-binding protein kinase 1
Tb927.2.3580	8.47546	876	transcription elongation factor s-II, putative
Tb927.11.980	8.47285	877	Nucleoporin NUP158
Tb927.8.6180	8.47277	878	60S ribosomal protein L26, putative
Tb927.9.14370	8.47277	879	60S ribosomal protein L26, putative
Tb927.8.650	8.47181	880	cation-transporting ATPase, putative
Tb927.11.12150	8.47161	881	flagellar pocket cytoskeletal protein bilbo1
Tb927.3.3690	8.47052	882	flagellar radial spoke protein-like, putative
Tb11.v5.0348	8.46688	883	hypothetical protein, conserved
Tb927.10.15330	8.46688	884	CYTH domain containing protein, putative
Tb927.11.14120	8.46304	885	phenylalanyl-tRNA synthetase alpha chain, putative
Tb927.3.5530	8.46297	886	Tb-292 membrane associated protein
Tb927.4.2060	8.46272	887	Flagellum attachment zone protein 8
Tb927.5.3820	8.46069	888	aspartate carbamoyltransferase, putative
Tb11.v5.0763	8.46039	889	Eukaryotic translation initiation factor 4 gamma 5, putative
Tb927.8.4500	8.46039	890	Eukaryotic translation initiation factor 4 gamma 5
Tb927.5.3030	8.45873	891	Intraflagellar transport protein 121
Tb927.11.10060	8.45733	892	Biotin--acetyl-CoA-carboxylase ligase, putative
Tb927.8.4210	8.4566	893	basal body component, putative
Tb927.10.14180	8.45646	894	protein transport protein SEC13
Tb927.11.2300	8.45387	895	eukaryotic peptide chain release factor subunit 1, putative
Tb927.8.690	8.45349	896	peptidyl-prolyl cis-trans isomerase/rotamase, putative
Tb927.10.5140	8.45295	897	Mitogen-activated protein kinase 6
Tb927.3.1060	8.45277	898	cAMP Response Protein 4
Tb927.3.4720	8.45213	899	dynamin-1-like protein
Tb927.10.15750	8.45123	900	Tripartite attachment complex protein 197
Tb927.11.4210	8.45123	901	U-box domain containing protein, putative
Tb927.10.4640	8.45012	902	eukaryotic translation initiation factor 3 subunit l
Tb927.11.15130	8.4499	903	DnaJ homolog, putative
Tb927.6.4390	8.44871	904	kinesin, putative
Tb927.10.1550	8.44832	905	proteasome regulatory non-ATP-ase subunit 5
Tb927.5.1520	8.44665	906	ATP-dependent protease ATPase subunit HslU1
Tb927.11.3500	8.44661	907	Dpy-30 motif containing protein, putative
Tb927.7.2780	8.44628	908	hypothetical protein, conserved
Tb927.6.2550	8.44488	909	RNA-binding protein, putative
Tb927.7.6890	8.44482	910	methyltransferase domain containing protein, putative
Tb927.5.2950	8.44453	911	Component of motile flagella 3
Tb927.10.11700	8.4438	912	guanylate kinase, putative
Tb927.11.15680	8.44351	913	hypothetical protein, conserved
Tb927.5.2080	8.44332	914	GMP reductase
Tb927.10.14760	8.44279	915	clathrin light chain, putative
Tb927.3.1680	8.44247	916	Eukaryotic translation initiation factor 3 subunit F
Tb927.11.4860	8.44112	917	Ring finger domain containing protein, putative
Tb927.11.2130	8.44073	918	proteasome regulatory non-ATP-ase subunit 3
Tb927.9.4500	8.43992	919	heat shock protein, putative
Tb927.6.2740	8.43857	920	pyridoxal kinase
Tb927.2.3880	8.43855	921	heterogeneous nuclear ribonucleoproteins F/H homologue
Tb927.10.3560	8.43828	922	arginine N-methyltransferase, putative
Tb927.10.7500	8.43737	923	fibrillarin
Tb927.6.3150	8.43704	924	Hydin
Tb927.10.13360	8.43664	925	Elongation factor Tu, mitochondrial
Tb927.11.16090	8.43568	926	Outer dynein arm docking complex protein 2, putative
Tb927.11.860	8.43444	927	leucine-rich repeat protein (LRRP), putative
Tb927.11.9220	8.43432	928	proteasome regulatory non-ATP-ase subunit 2
Tb11.v5.0504	8.43407	929	RNA polymerase IIA largest subunit, putative
Tb927.8.7400	8.43407	930	RNA polymerase IIA largest subunit
Tb927.11.13180	8.43387	931	Present in the outer mitochondrial membrane proteome 10
Tb927.6.2420	8.43324	932	p22 protein precursor
Tb11.v5.0638	8.43303	933	serine carboxypeptidase III precursor, putative
Tb927.10.1030	8.43303	934	serine peptidase, Clan SC, Family S10
Tb927.10.1050	8.43303	935	serine peptidase, Clan SC, Family S10
Tb11.v5.0611	8.43223	936	hypothetical protein, conserved
Tb927.7.2570	8.43223	937	guide RNA associated protein, GAP2
Tb927.4.4240	8.43201	938	hypothetical protein, conserved
Tb927.4.4260	8.43201	939	hypothetical protein, conserved
Tb927.4.4280	8.43201	940	hypothetical protein, conserved
Tb11.v5.0753	8.43106	941	hypothetical protein, conserved
Tb927.10.840	8.43106	942	Flagellum attachment zone protein 6
Tb927.10.9360	8.43028	943	L-2-hydroxyglutarate dehydrogenase, mitochondrial, putative
Tb927.11.3000	8.42939	944	60S ribosomal protein L37, putative
Tb927.9.9210	8.42939	945	60S ribosomal protein L37, putative
Tb927.10.12840	8.42862	946	mitochondrial carrier protein
Tb927.7.3620	8.42836	947	tyrosyl-tRNA synthetase
Tb927.11.2690	8.42799	948	Succinyl-CoA:3-ketoacid coenzyme A transferase, mitochondrial
Tb927.10.3520	8.42777	949	protease regulatory ATPase subunit 4
Tb927.8.4280	8.42725	950	nuclear transport factor 2, putative
Tb927.10.2980	8.42567	951	proteasome regulatory non-ATPase subunit 11
Tb927.10.3030	8.42567	952	proteasome regulatory non-ATPase subunit 11
Tb927.10.14770	8.42409	953	Associated kinase of Tb14-3-3
Tb927.11.13920	8.42377	954	kinesin-II 85 Kd subunit, putative
Tb927.7.2500	8.42271	955	proteasome regulatory ATPase subunit 1
Tb927.11.9130	8.42251	956	Replication factor A protein 1
Tb927.6.3100	8.42133	957	Intraflagellar transport complex B protein 46 C terminal, putative
Tb927.10.14990	8.41966	958	intraflagellar transport protein 80
Tb927.3.5090	8.4193	959	tryparedoxin 2, putative
Tb927.10.14010	8.41753	960	tubulin cofactor C domain-containing protein RP2
Tb927.11.15150	8.41742	961	1-acyl-sn-glycerol-3-phosphate acyltransferase, putative
Tb927.10.830	8.41712	962	adenylate kinase, putative
Tb927.10.11760	8.41582	963	pumilio/PUF RNA binding protein 6
Tb927.10.15180	8.41552	964	nucleosome assembly protein, putative
Tb927.5.1660	8.41547	965	pyruvate dehydrogenase phosphatase, putative
Tb927.9.1520	8.41543	966	hypothetical protein, conserved
Tb927.10.5670	8.41466	967	N-acetyltransferase subunit Nat1, putative
Tb927.9.9820	8.41373	968	glyceraldehyde-3-phosphate dehydrogenase, putative
Tb927.11.10240	8.41281	969	ATP-dependent protease subunit HslV
Tb927.10.560	8.41242	970	40S ribosomal proteins S11, putative
Tb927.10.5940	8.41234	971	NEK family Serine/threonine-protein kinase, putative
Tb927.10.1430	8.40936	972	hypothetical protein, conserved
Tb927.8.5250	8.40864	973	delta-coat protein, putative
Tb927.4.1930	8.40692	974	eukaryotic translation initiation factor 3 subunit g
Tb927.10.200	8.40646	975	vacuolar ATP synthase, putative
Tb927.3.5370	8.40457	976	hypothetical protein, conserved
Tb11.02.5420	8.40442	977	NADPH-cytochrome p450 reductase, putative
Tb11.02.5420b	8.40442	978	NADPH-cytochrome p450 reductase, putative
Tb927.3.2310	8.40094	979	parkin coregulated gene protein
Tb927.11.8060	8.40079	980	SNARE associated Golgi protein, putative
Tb927.6.2090	8.40027	981	pdz domain containing protein, putative
Tb927.11.16810	8.39915	982	dynein light intermediate chain D1bLIC, putative
Tb11.v5.0837	8.39912	983	importin beta-1 subunit, putative
Tb927.10.2900	8.39912	984	importin beta-1 subunit, putative
Tb11.v5.0768	8.39682	985	aspartyl aminopeptidase, putative
Tb927.3.3410	8.39682	986	aspartyl aminopeptidase, putative
Tb927.11.17840	8.39523	987	retrotransposon hot spot protein (RHS), degenerate
Tb927.5.160	8.39523	988	retrotransposon hot spot protein (RHS, pseudogene), putative
Tb927.10.9250	8.39416	989	adenylyl cyclase-associated protein, putative
Tb927.4.590	8.39286	990	PQQ-like domain/Protein of unknown function (DUF1620), putative
Tb927.1.3200	8.39058	991	Suppressor of G2 allele of SKP1, putative
Tb927.11.3030	8.38941	992	phosphoribosylpyrophosphate synthetase, putative
Tb927.3.1030	8.38926	993	RNA-binding protein
Tb927.2.560	8.3892	994	retrotransposon hot spot protein 4 (RHS4), putative
Tb927.9.3770	8.38888	995	hypothetical protein, conserved
Tb927.9.6130	8.38817	996	calmodulin, putative
Tb927.3.780	8.38498	997	proteasome alpha 7 subunit
Tb927.8.5880	8.3847	998	eukaryotic translation initiation factor 1A, putative
Tb927.9.11100	8.38323	999	cAMP-dependent protein kinase catalytic subunit 1
Tb927.5.2850	8.38147	1000	radial spoke protein RSP2, putative
Tb927.8.1590	8.38098	1001	ubiquitin-protein ligase, putative
Tb927.9.8450	8.37893	1002	UMP/CMP kinase
Tb927.11.11460	8.3772	1003	Mitochondrial import receptor subunit ATOM69
Tb927.2.6050	8.37718	1004	beta prime COP protein
Tb927.7.4290	8.37651	1005	Nuclear distribution protein C homolog
Tb927.6.2060	8.37585	1006	histidyl-tRNA synthetase
Tb08.27P2.160	8.37533	1007	expression site-associated gene 3 (ESAG3), degenerate
Tb08.27P2.520	8.37533	1008	expression site-associated gene 3 (ESAG3), degenerate
Tb10.v4.0147	8.37533	1009	variant surface glycoprotein (VSG, pseudogene), putative
Tb10.v4.0255	8.37533	1010	expression site-associated gene 3 (ESAG3, pseudogene), putative
Tb11.0220	8.37533	1011	expression site-associated gene 3 (ESAG3), degenerate
Tb11.0700	8.37533	1012	expression site-associated gene 3 (ESAG3), degenerate
Tb11.57.0050	8.37533	1013	expression site-associated gene 3 (ESAG3), frameshifted and degenerate
Tb927.11.18800	8.37533	1014	expression site-associated gene 3 (ESAG3) protein, putative
Tb927.11.19120	8.37533	1015	expression site-associated gene 3 (ESAG3) protein, putative (pseudogene)
Tb927.11.19900	8.37533	1016	expression site-associated gene 3 (ESAG3), degenerate and frameshifted
Tb927.11.20150	8.37533	1017	expression site-associated gene 3 (ESAG3), frameshifted and degenerate
Tb927.11.20560	8.37533	1018	expression site-associated gene 3 (ESAG3, pseudogene), putative
Tb927.3.160	8.37533	1019	expression site-associated gene 3 (ESAG3), degenerate
Tb927.3.430	8.37533	1020	expression site-associated gene 3 (ESAG3), truncated
Tb927.11.6160	8.37396	1021	eukaryotic release factor 3, putative
Tb927.11.4900	8.37395	1022	WD40/YVTN repeat-like-containing protein
Tb927.11.3770	8.37231	1023	Dpy-30 motif containing protein, putative
Tb927.10.8170	8.37224	1024	Nucleoporin NUP144
Tb927.10.9740	8.37196	1025	Regulatory particle triple-A ATPase subunit 6
Tb927.11.12210	8.37191	1026	Domain of unknown function (DUF4586), putative
Tb927.11.4910	8.37181	1027	predicted ankyrin repeat family protein
Tb927.11.13280	8.3709	1028	Guide RNA binding protein 25
Tb927.2.1560	8.37068	1029	peptidyl-prolyl cis-trans isomerase, putative
Tb927.2.1680	8.37068	1030	peptidyl-prolyl cis-trans isomerase, putative
Tb05.5K5.40	8.36947	1031	hypothetical protein, conserved
Tb927.5.4390	8.36947	1032	hypothetical protein, conserved
Tb927.10.14160	8.36842	1033	Aquaglyceroporin 3
Tb11.v5.0214	8.36798	1034	retrotransposon hot spot (RHS) protein, putative
Tb927.5.295b	8.36798	1035	retrotransposon hotspot (RHS) protein 1
Tb927.11.8950	8.3669	1036	leucine rich repeat
Tb927.9.7550	8.36272	1037	adenylosuccinate lyase, putative
Tb927.11.9890	8.36202	1038	signal recognition particle receptor alpha subunit, putative
Tb927.9.11050	8.36195	1039	4E-interacting protein, putative
Tb11.v5.0681	8.36164	1040	hypothetical protein, conserved
Tb927.8.3870	8.36164	1041	Nucleolar protein 127
Tb927.8.4400	8.35926	1042	Outer dynein arm docking complex protein 1, putative
Tb927.10.12410	8.35904	1043	hypothetical protein, conserved
Tb11.v5.0875	8.35818	1044	hypothetical protein, conserved
Tb927.10.1490	8.35818	1045	Temperature dependent protein affecting M2 dsRNA replication, putative
Tb927.11.13520	8.35724	1046	hypothetical protein, conserved
Tb927.10.11930	8.35723	1047	beta-D-hydroxybutyrate dehydrogenase
Tb927.2.5800	8.35602	1048	sedoheptulose-1,7-bisphosphatase
Tb927.11.4920	8.35524	1049	hypothetical protein, conserved
Tb927.10.8780	8.35481	1050	AAA domain containing protein, putative
Tb927.11.1330	8.35444	1051	Stress responsive A/B Barrel Domain, putative
Tb927.8.3690	8.35433	1052	isocitrate dehydrogenase [NADP], mitochondrial precursor, putative
Tb927.3.4630	8.35406	1053	UDP-glucose:glycoprotein glucosyltransferase, putative
Tb927.9.2010	8.35289	1054	kynureninase, putative
Tb927.11.10025	8.35147	1055	60S ribosomal protein L29, putative
Tb927.11.10030	8.35147	1056	60S ribosomal protein L29, putative
Tb927.11.6330	8.35116	1057	6-phosphogluconolactonase
Tb927.11.9610	8.35034	1058	eukaryotic translation initiation factor 3 subunit i
Tb927.8.4890	8.34827	1059	pol-associated gene 1
Tb927.10.170	8.34758	1060	pseudouridine synthase, Cbf5p
Tb11.v5.0275	8.34725	1061	major vault protein, putative
Tb927.10.6310	8.34725	1062	major vault protein, putative
Tb927.11.6610	8.34705	1063	hypothetical protein, conserved
Tb927.10.8540	8.3466	1064	chaperone protein DnaJ, putative
Tb927.7.3560	8.34658	1065	Component of motile flagella 7
Tb927.10.2490	8.34597	1066	glucose-6-phosphate 1-dehydrogenase
Tb927.2.3780	8.34548	1067	translation initiation factor IF-2, putative
Tb927.4.4690	8.34463	1068	hypothetical protein, conserved
Tb927.5.1100	8.34335	1069	peroxisome targeting signal 1 receptor
Tb927.10.1400	8.34192	1070	hypoxanthine-guanine phosphoribosyltransferase
Tb927.10.1470	8.34192	1071	hypoxanthine-guanine phosphoribosyltransferase
Tb927.11.2540	8.34169	1072	hypothetical protein, conserved
Tb927.5.1880	8.34149	1073	inhibitor of serine peptidase (ISP), putative
Tb927.11.7900	8.339	1074	mitochondrial RNA binding protein 16
Tb927.4.1330	8.33867	1075	DNA topoisomerase IB, large subunit
Tb927.11.2400	8.33827	1076	Flabarin-like protein
Tb927.5.1470	8.33732	1077	NADH-cytochrome b5 reductase, putative
Tb927.9.8720	8.33635	1078	fructose-1,6-bisphosphatase
Tb927.4.3810	8.33531	1079	DNA-directed RNA polymerase II subunit 2, putative
Tb927.10.2810	8.3348	1080	hypothetical protein, conserved
Tb927.10.15720	8.33209	1081	proteasome regulatory non-ATP-ase subunit 9
Tb927.5.1900	8.33136	1082	Outer dynein arm docking complex protein 1, putative
Tb927.10.2380	8.32785	1083	Tetratricopeptide repeat, putative
Tb11.v5.0162	8.32768	1084	proteasome beta 6 subunit
Tb927.7.4790	8.32768	1085	proteasome beta 6 subunit
Tb927.3.5550	8.32763	1086	intraflagellar transport protein 27
Tb927.5.3560	8.32559	1087	vesicle-associated membrane protein, putative
Tb927.5.2890	8.32276	1088	AAA domain (dynein-related subfamily)/von Willebrand factor type A domain containing protein, putative
Tb927.10.14510	8.32169	1089	root hair defective 3 GTP-binding protein (RHD3), putative
Tb11.v5.0777	8.31994	1090	paraflagellar rod protein, putative
Tb927.2.4330	8.31994	1091	paraflagellar rod protein 5, putative
Tb927.10.2560	8.31935	1092	mitochondrial malate dehydrogenase
Tb11.v5.0822	8.31901	1093	ATP synthase, putative
Tb927.10.730	8.31901	1094	ATP synthase, putative
Tb927.11.12680	8.31854	1095	prefoldin subunit 2, putative
Tb11.v5.0608	8.31586	1096	DNA-directed RNA polymerase III largest subunit, putative
Tb11.v5.0609	8.31586	1097	DNA-directed RNA polymerase III largest subunit, putative
Tb927.10.2780	8.31586	1098	DNA-directed RNA polymerase III subunit C1
Tb11.v5.0584	8.31504	1099	hypothetical protein, conserved
Tb927.3.3180	8.31504	1100	Nucleoporin NUP98
Tb11.v5.1063	8.31433	1101	hypothetical protein, conserved
Tb927.10.14620	8.31433	1102	hypothetical protein, conserved
Tb927.10.14740	8.31433	1103	hypothetical protein, conserved
Tb927.2.450	8.31379	1104	retrotransposon hot spot protein 4 (RHS4), putative
Tb927.11.14590	8.31315	1105	G5-interacting protein
Tb927.4.2240	8.31312	1106	Aminotransferase class IV, putative
Tb927.11.6500	8.31253	1107	40S ribosomal protein S21, putative
Tb927.11.6510	8.31253	1108	40S ribosomal protein S21, putative
Tb927.8.5330	8.31203	1109	tyrosyl/methionyl-tRNA synthetase, putative
Tb927.8.2250	8.31063	1110	Fungal tRNA ligase phosphodiesterase domain containing protein, putative
Tb927.11.2570	8.31031	1111	hypothetical protein, conserved
Tb927.3.4040	8.31019	1112	Ankyrin repeats (3 copies), putative
Tb927.7.5540	8.30965	1113	2,4-dienoyl-coa reductase-like protein
Tb927.11.11590	8.30795	1114	Eukaryotic translation initiation factor 3 subunit E
Tb927.9.6920	8.30621	1115	hypothetical protein, conserved
Tb927.11.7780	8.30594	1116	Mitochondrial import receptor subunit ATOM46
Tb927.11.2670	8.3043	1117	Nucleoporin NUP59
Tb927.5.1710	8.30372	1118	ATP synthase F(0) complex subunit B, mitochondrial, putative
Tb927.1.4490	8.30302	1119	acetyltransferase, putative
Tb927.8.4370	8.3029	1120	hypothetical protein, conserved
Tb927.8.5760	8.30134	1121	Ankyrin repeats (many copies)/Alpha/beta hydrolase family, putative
Tb927.9.13610	8.30113	1122	helicase, putative
Tb927.2.4810	8.3006	1123	Component of motile flagella 5
Tb11.v5.0630	8.3005	1124	SUMO-interacting motif-containing protein
Tb927.4.2600	8.3005	1125	SUMO-interacting motif-containing protein
Tb927.6.1080	8.29881	1126	hydroxyacylglutathione hydrolase, putative
Tb927.5.2320	8.29621	1127	Mak10 subunit, NatC N(alpha)-terminal acetyltransferase, putative
Tb927.7.2100	8.29421	1128	GMP synthase [glutamine-hydrolysing]
Tb11.v5.0575	8.293	1129	Coiled-coil domain-containing protein 40 homolog (fragment)
Tb927.10.11250	8.293	1130	Coiled-coil domain-containing protein 40 homolog
Tb927.4.4490	8.29298	1131	multidrug resistance protein E
Tb927.5.550	8.29266	1132	V-type proton ATPase subunit D, putative
Tb927.3.3610	8.29237	1133	peroxisomal targeting signal 2 receptor, putative
Tb927.6.3050	8.29139	1134	Aldehyde dehydrogenase 3, putative
Tb927.11.3220	8.29032	1135	metacaspase
Tb927.1.710	8.28674	1136	phosphoglycerate kinase
Tb927.2.1210	8.28602	1137	retrotransposon hot spot protein 4 (RHS4), putative
Tb11.v5.0689	8.28564	1138	NOT2 / NOT3 / NOT5 family, putative
Tb927.6.850	8.28564	1139	ccr4-not transcription complex subunit 2
Tb927.4.1920	8.28547	1140	GPI transamidase subunit 16, putative
Tb927.3.4840	8.28546	1141	ubiquitin carboxyl-terminal hydrolase, putative
Tb927.9.5100	8.28429	1142	cAMP-specific phosphodiesterase
Tb927.4.360	8.28382	1143	1,2-Dihydroxy-3-keto-5-methylthiopentene dioxygenase, putative
Tb927.10.1970	8.28359	1144	CHAT domain containing protein, putative
Tb927.8.7020	8.28307	1145	peptidase, putative
Tb11.v5.0616	8.28077	1146	paraflagellar rod protein, putative
Tb927.7.6970	8.28077	1147	paraflagellar rod protein, putative
Tb927.5.1260	8.28027	1148	Sulfate transporter N-terminal domain with GLY motif/Sulfate transporter family, putative
Tb927.11.5180	8.28014	1149	hypothetical protein, conserved
Tb927.10.10880	8.27983	1150	ATP-binding cassette sub-family F member 1, putative
Tb927.11.3710	8.27892	1151	hypothetical protein, conserved
Tb927.6.2860	8.27886	1152	WD domain, G-beta repeat, putative
Tb927.7.5660	8.27763	1153	Outer dynein arm docking complex protein 2, putative
Tb927.5.2410	8.27606	1154	kinesin, putative
Tb927.8.3060	8.27502	1155	metallo-peptidase, Clan MF, Family M17
Tb927.11.5300	8.27497	1156	Kinesin-13 3, putative
Tb927.7.940	8.2743	1157	protein kinase C substrate protein, heavy chain, putative
Tb927.4.1850	8.27192	1158	hypothetical protein, conserved
Tb927.10.240	8.26949	1159	peroxin 14, putative
Tb927.11.11080	8.2689	1160	Nucleoporin NUP149
Tb927.11.14900	8.26769	1161	coatomer subunit epsilon
Tb927.11.7470	8.2676	1162	hypothetical protein, conserved
Tb927.6.4520	8.26744	1163	Tumour suppressor, Mitostatin, putative
Tb927.11.1710	8.26379	1164	guide RNA-binding protein of 21 kDa
Tb11.v5.0897	8.26356	1165	hypothetical protein, conserved
Tb927.10.13200	8.26356	1166	kinetoplast ribosomal PPR-repeat containing protein 4
Tb927.6.1660	8.2635	1167	hypothetical protein, conserved
Tb927.4.1540	8.26299	1168	NAD dependent epimerase/dehydratase family, putative
Tb927.10.6940	8.26145	1169	Dipeptidyl-peptidase 8-like, putative
Tb927.10.6970	8.26145	1170	serine peptidase, Clan SC, Family S9B
Tb927.2.5760	8.26118	1171	Flagellar Member 8
Tb927.2.380	8.26078	1172	retrotransposon hot spot protein 2 (RHS2), putative
Tb927.9.13440	8.26003	1173	Flagellar Member 5
Tb927.8.1960	8.25972	1174	CCR4-NOT transcription complex subunit 11
Tb927.11.10510	8.25864	1175	ubiquinone biosynthesis methyltransferase, putative
Tb927.8.5850	8.25787	1176	hypothetical protein, conserved
Tb927.3.2490	8.25744	1177	hypothetical protein, conserved
Tb11.v5.0612	8.25737	1178	MYND finger, putative
Tb927.7.7070	8.25737	1179	MYND finger, putative
Tb927.5.1700	8.25663	1180	replication Factor A 28 kDa subunit, putative
Tb927.10.15530	8.25602	1181	ABC transport system ATP-binding protein, putative
Tb927.5.1930	8.25461	1182	signal peptidase subunit, putative
Tb927.4.4130	8.25239	1183	Flagellar-associated protein 59, putative
Tb927.9.8410	8.25075	1184	chaperone protein DnaJ, putative
Tb927.10.14000	8.25013	1185	aconitase
Tb927.10.3200	8.24931	1186	U2 splicing auxiliary factor, putative
Tb927.10.180	8.2493	1187	ATP synthase F1 subunit gamma protein, putative
Tb927.1.3310	8.2475	1188	hypothetical protein, conserved
Tb11.v5.0172	8.24734	1189	hypothetical protein, conserved
Tb927.7.4910	8.24734	1190	hypothetical protein, conserved
Tb927.8.4640	8.24708	1191	Component of motile flagella 19
Tb927.8.900	8.24706	1192	splicing factor TSR1
Tb927.10.4980	8.24659	1193	ubiquitin-like protein DSK2, putative
Tb927.5.3170	8.2459	1194	ribose-phosphate pyrophosphokinase, putative
Tb927.11.14950	8.24587	1195	zinc finger protein 2
Tb927.7.3040	8.2443	1196	F-box and WD40 domain containing protein
Tb927.10.4610	8.2439	1197	dolicholphosphate-mannose synthase, putative
Tb927.4.3620	8.24145	1198	serine threonine-protein phosphatase PP1, putative
Tb927.11.12230	8.24069	1199	ATP-dependent protease ATPase subunit HslU2
Tb927.6.4610	8.239	1200	Ankyrin repeats (3 copies), putative
Tb927.10.7690	8.23846	1201	Component of motile flagella 4
Tb11.v5.0432	8.23709	1202	calpain-like cysteine peptidase, putative
Tb11.v5.0702	8.23709	1203	calpain-like cysteine peptidase, putative
Tb11.v5.1010	8.23709	1204	variant surface glycoprotein (VSG), putative
Tb927.11.1130	8.23709	1205	calpain-like cysteine peptidase, putative
Tb927.7.190	8.23693	1206	thimet oligopeptidase, putative
Tb11.v5.0596	8.2361	1207	serine/threonine protein kinase, putative
Tb927.10.4940	8.2361	1208	Nuclear Dbf2-related kinase
Tb927.11.11210	8.23552	1209	paraflagellar rod component, putative
Tb927.3.3830	8.23544	1210	hypothetical protein, conserved
Tb11.v5.0200	8.23539	1211	proteasome beta 5 subunit, putative
Tb927.10.6080	8.23539	1212	proteasome subunit beta type-5, putative
Tb927.8.2000	8.23519	1213	cyclophilin, putative
Tb927.6.640	8.23489	1214	ApaH-like phosphatase ALPH1
Tb927.10.14390	8.23429	1215	FACT complex subunit POB3
Tb927.6.1520	8.23119	1216	Aquaglyceroporin 1
Tb927.11.16030	8.23115	1217	proteasome regulatory non-ATP-ase subunit 7
Tb927.5.3220	8.23014	1218	signal peptidase type I, putative
Tb927.6.2280	8.22935	1219	prefoldin subunit, putative
Tb927.6.2340	8.22935	1220	prefoldin subunit, putative
Tb927.4.410	8.22906	1221	CAF 40
Tb927.10.1630	8.22854	1222	atp-binding cassette sub-family e member 1
Tb927.3.1900	8.22635	1223	conserved protein, unknown function
Tb927.5.1140	8.22555	1224	choline/ethanolamine kinase
Tb927.10.2880	8.22467	1225	Voltage-dependent calcium channel subunit, putative
Tb927.7.4460	8.22357	1226	von Willebrand factor type A domain containing protein, putative
Tb927.7.5340	8.22355	1227	cAMP response protein 3
Tb927.7.1690	8.22314	1228	Silent information regulator 2 related protein 1
Tb927.4.430	8.22245	1229	proteasome beta 7 subunit
Tb927.3.2890	8.22217	1230	radial spoke protein RSP10, putative
Tb927.6.3940	8.22149	1231	Autophagy-related protein 27, putative
Tb11.v5.0354	8.22108	1232	TPR repeat, putative
Tb11.v5.0355	8.22108	1233	TPR repeat, putative
Tb927.11.9910	8.22108	1234	Domain of unknown function (DUF3846)/TPR repeat, putative
Tb927.9.14430	8.22083	1235	Casein kinase II
Tb927.11.1420	8.22074	1236	hypothetical protein, conserved
Tb11.v5.0246	8.22042	1237	eukaryotic translation initiation factor 6, putative
Tb927.10.5300	8.22042	1238	eukaryotic translation initiation factor 6 (eIF-6), putative
Tb927.8.2820	8.21977	1239	hypothetical protein, conserved
Tb927.5.2780	8.21813	1240	mitochondrial DNA polymerase beta
Tb927.9.9670	8.21811	1241	proteasome alpha 1 subunit, putative
Tb927.11.6530	8.21801	1242	hypothetical protein, conserved
Tb927.10.7060	8.21456	1243	Nucleoporin NUP96
Tb927.9.15070	8.21407	1244	hypothetical protein, conserved
Tb927.8.7970	8.21402	1245	hypothetical protein
Tb927.11.4880	8.21371	1246	Calmodulin-binding, putative
Tb927.11.16890	8.21296	1247	Tetratricopeptide-like helical domain containing protein
Tb927.10.14240	8.21226	1248	N-myristoyltransferase
Tb927.3.1920	8.20998	1249	General negative regulator of transcription subunit 5
Tb927.9.2900	8.20959	1250	U3 small nucleolar RNA-associated protein 10, putative
Tb927.11.16970	8.20957	1251	protein phosphatase 4, putative
Tb927.11.5510	8.20919	1252	dynein light chain p28, axonemal, putative
Tb927.8.6940	8.20851	1253	hypothetical protein, conserved
Tb927.6.4650	8.20834	1254	UV excision repair RAD23 protein, putative
Tb927.10.14170	8.20743	1255	aquaglyceroporin 2
Tb927.4.3890	8.20655	1256	ATP-dependent RNA helicase, putative
Tb927.2.820	8.20638	1257	retrotransposon hot spot protein 1 (RHS1), interrupted
Tb927.3.5540	8.20343	1258	dynein intermediate chain WDRD34, putative
Tb927.5.2190	8.20326	1259	META domain/Domain of unknown function (DUF1935), putative
Tb927.5.2220	8.20326	1260	META domain/Domain of unknown function (DUF1935), putative
Tb927.5.2250	8.20326	1261	META domain/Domain of unknown function (DUF1935), putative
Tb927.10.4710	8.20112	1262	proteasome subunit beta type-2, putative
Tb927.3.860	8.20063	1263	Acyl carrier protein, mitochondrial
Tb927.5.1730	8.20042	1264	Ecotin-like protein
Tb927.11.6390	8.20033	1265	START domain containing protein, putative
Tb927.11.15870	8.19972	1266	hypothetical protein, conserved
Tb927.7.3450	8.1997	1267	protein I/6
Tb05.5K5.420	8.19743	1268	variant surface glycoprotein (VSG, pseudogene), putative
Tb09.v4.0033	8.19743	1269	expression site-associated gene 3 (ESAG3), fragment
Tb11.1140	8.19743	1270	expression site-associated gene 3 (ESAG3), degenerate
Tb927.5.4860	8.19743	1271	expression site-associated gene 3 (ESAG3), degenerate
Tb927.3.3900	8.19716	1272	carnitine O-palmitoyltransferase II, putative
Tb927.10.13110	8.19613	1273	Outer arm dynein light chain 7
Tb927.10.15000	8.1952	1274	hypothetical protein, conserved
Tb927.7.3920	8.19441	1275	hypothetical protein, conserved
Tb927.4.660	8.19421	1276	hypothetical protein, conserved
Tb927.9.10790	8.19368	1277	hypothetical protein
Tb927.11.11550	8.19322	1278	DNA topoisomerase II alpha, putative
Tb11.v5.0527	8.1932	1279	WD domain, G-beta repeat, putative
Tb927.10.16110	8.1932	1280	component of motile flagella 1
Tb927.2.3800	8.19252	1281	guide RNA associated protein 1
Tb927.8.3790	8.19185	1282	paraflagellar rod component, putative
Tb927.5.3970	8.19163	1283	adenylate kinase, putative
Tb927.10.14040	8.191	1284	vacuolar ATP synthase subunit c, putative
Tb927.9.9840	8.18995	1285	lipoic acid containing carrier protein, putative
Tb927.11.5400	8.18974	1286	signal recognition particle 54 kDa
Tb927.8.2050	8.18967	1287	GDP-mannose pyrophosphorylase
Tb927.7.3250	8.18936	1288	expression site-associated gene 6 (ESAG6) protein, putative
Tb927.7.3260	8.18936	1289	expression site-associated gene 7 (ESAG7) protein, putative
Tb927.11.3360	8.18849	1290	Component of motile flagella 22
Tb927.6.2210	8.18818	1291	hypothetical protein, conserved
Tb927.6.2230	8.18791	1292	RGG protein
Tb927.3.5310	8.18767	1293	paraflagellar rod protein
Tb927.1.3260	8.18677	1294	hypothetical protein, conserved
Tb927.2.3270	8.18389	1295	65 kDa invariant surface glycoprotein
Tb927.4.470	8.18314	1296	snoRNP protein GAR1, putative
Tb927.11.13670	8.18218	1297	hypothetical protein, conserved
Tb927.7.2400	8.18162	1298	tyrosyl-tRNA synthetase, putative
Tb11.v5.0195	8.17992	1299	STAG domain containing protein, putative
Tb927.10.6010	8.17992	1300	Cohesin subunit SCC3, putative
Tb927.4.1020	8.17709	1301	serine-palmitoyl-CoA transferase, putative
Tb927.3.5010	8.17683	1302	hypothetical protein, conserved
Tb927.8.1570	8.17515	1303	Uncharacterised protein family (UPF0172), putative
Tb927.11.5680	8.17372	1304	dynein light chain 1, axonemal
Tb927.4.3320	8.17313	1305	uracil phosphoribosyltransferase, putative
Tb927.8.1210	8.17208	1306	hypothetical protein, conserved
Tb927.3.1200	8.17202	1307	hypothetical protein, conserved
Tb927.10.8240	8.17144	1308	hypothetical protein, conserved
Tb927.11.8370	8.16884	1309	Nucleus and spindle associated protein 1
Tb927.11.4740	8.16855	1310	paraflagellar rod component, putative
Tb927.3.1670	8.16799	1311	hypothetical protein, conserved
Tb927.9.12070	8.1679	1312	hypothetical protein, conserved
Tb10.v4.0045	8.16745	1313	prohibitin, putative
Tb927.10.4310	8.16745	1314	prohibitin 2, putative
Tb927.11.15240	8.16562	1315	Ras-related protein RAB2B, putative
Tb927.10.12940	8.16549	1316	predicted zinc finger protein
Tb927.11.7707	8.16435	1317	Tctex-1 family, putative
Tb927.11.7740	8.16435	1318	dynein light chain, putative
Tb927.8.7040	8.16403	1319	hypothetical protein, conserved
Tb927.10.14320	8.16275	1320	Flagellum attachment zone protein 9
Tb927.8.5380	8.16265	1321	ubiquitin fold modifier protein, putative
Tb927.10.9430	8.16221	1322	phosphoribosylpyrophosphate synthetase, putative
Tb927.11.12780	8.16221	1323	ribonucleoside-diphosphate reductase small chain, putative
Tb927.11.12790	8.16221	1324	ribonucleoside-diphosphate reductase small chain
Tb927.11.12800	8.16221	1325	ribonucleoside-diphosphate reductase small chain
Tb927.11.12810	8.16221	1326	ribonucleoside-diphosphate reductase small chain
Tb927.11.12820	8.16221	1327	ribonucleoside-diphosphate reductase small chain
Tb927.11.2230	8.16181	1328	carnitine O-acetyltransferase, putative
Tb927.1.4280	8.16175	1329	hypothetical protein, conserved
Tb927.11.4360	8.15938	1330	Protein of unknown function (DUF1014), putative
Tb927.11.10070	8.15877	1331	Bromodomain, putative
Tb927.10.8720	8.15866	1332	CCR4-NOT transcription complex subunit 10, putative
Tb927.11.3970	8.15823	1333	hypothetical protein, conserved
Tb927.10.9440	8.15768	1334	NADH dehydrogenase
Tb927.10.8030	8.15633	1335	Mitochondrial ATP synthase subunit 5
Tb11.v5.0171	8.15503	1336	5'-3' exonuclease XRNA, putative
Tb927.7.4900	8.15503	1337	5'-3' exoribonuclease A
Tb927.9.11850	8.15442	1338	structural maintenance of chromosome 1, putative
Tb927.11.12540	8.15431	1339	leucine-rich repeat protein (LRRP), putative
Tb927.11.9720	8.15418	1340	40S ribosomal protein S27, putative
Tb927.7.4070	8.15304	1341	cysteine peptidase, Clan CA, family C2, putative
Tb927.10.6640	8.15123	1342	transmembrane emp24 domain-containing protein
Tb927.3.3330	8.151	1343	heat shock protein 20, putative
Tb927.9.9450	8.15079	1344	zinc finger protein family member, putative
Tb11.v5.0331	8.15067	1345	THT1 - hexose transporter, putative
Tb11.v5.0332	8.15067	1346	THT2A - glucose transporter, putative
Tb11.v5.0333	8.15067	1347	THT1 - hexose transporter, putative, fragment
Tb927.10.8490	8.15067	1348	glucose transporter, putative
Tb927.10.8500	8.15067	1349	glucose transporter, putative
Tb927.10.8510	8.15067	1350	glucose transporter, putative
Tb927.10.8520	8.15067	1351	glucose transporter, putative
Tb927.10.8530	8.15067	1352	glucose transporter 2A
Tb927.4.5310	8.15062	1353	Repressor of differentiation kinase 2
Tb927.10.14950	8.15045	1354	Zinc finger CCCH domain-containing protein 40
Tb927.4.3790	8.14973	1355	ubiquitin carboxyl-terminal hydrolase, putative
Tb927.11.14220	8.14883	1356	Regulator of ESAG9-1
Tb11.v5.0399	8.14681	1357	hypothetical protein, conserved
Tb927.10.9650	8.14681	1358	Nucleoporin NUP152
Tb927.7.570	8.14477	1359	prefoldin, putative
Tb927.4.4040	8.14466	1360	hypothetical protein, conserved
Tb927.2.2120	8.14465	1361	Serine/threonine-protein kinase NEK22, putative
Tb927.7.5210	8.14247	1362	Putative Phosphatase/Protein of unknown function DUF89, putative
Tb927.4.4450	8.14163	1363	adenylyl cyclase
Tb927.11.15420	8.14074	1364	eukaryotic translation initiation factor 3 subunit k
Tb927.9.9940	8.14045	1365	parkin coregulated gene protein
Tb927.7.6260	8.1398	1366	TPR repeat, putative
Tb927.8.1860	8.13969	1367	pitrilysin-like metalloprotease
Tb927.11.2270	8.13968	1368	inner dynein arm I1 intermediate chain, axonemal
Tb927.8.760	8.13959	1369	nucleolar RNA-binding protein
Tb927.11.3300	8.13842	1370	Spindle assembly abnormal 4
Tb927.11.3280	8.13794	1371	Kinesin-13 5, putative
Tb927.9.10400	8.13788	1372	hypothetical protein, conserved
Tb927.8.7990	8.13784	1373	Thioredoxin-like/Protein of unknown function (DUF3638)/Protein of unknown function (DUF3645), putative
Tb927.6.2250	8.13628	1374	rac serine-threonine kinase, putative
Tb10.v4.0033	8.13383	1375	pumillo RNA binding protein PUF1
Tb11.v5.0767	8.13383	1376	pumillo RNA binding protein PUF1, putative
Tb927.10.4430	8.13383	1377	pumillo RNA binding protein PUF1
Tb927.6.4710	8.13374	1378	calmodulin, putative
Tb927.3.4880	8.13359	1379	nucleosome assembly protein (NAP), putative
Tb927.7.5480	8.13183	1380	dihydrofolate reductase-thymidylate synthase
Tb927.11.1150	8.13153	1381	radial spoke protein 3
Tb927.10.2270	8.13118	1382	vacuolar protein sorting-associated protein 35, putative
Tb927.8.7490	8.13001	1383	symplekin
Tb10.v4.0044	8.12984	1384	hypothetical protein, conserved
Tb927.10.4320	8.12984	1385	hypothetical protein, conserved
Tb927.8.570	8.12961	1386	proteasome regulatory non-ATP-ase subunit 10
Tb927.4.2110	8.12955	1387	protein phosphatase 2C, putative
Tb927.5.3510	8.12861	1388	structural maintenance of chromosome 3 , putative
Tb927.9.12730	8.12778	1389	chaperone protein DnaJ, putative
Tb927.5.2930	8.12725	1390	Mitochondrial ATP synthase subunit, putative
Tb927.11.2750	8.12687	1391	Present in the outer mitochondrial membrane proteome 12
Tb927.10.15590	8.12684	1392	macrophage infectivity potentiator, precursor, putative
Tb927.9.15090	8.1266	1393	cytosolic coat protein, putative
Tb927.3.290	8.12627	1394	expression site-associated gene 3 (ESAG3), degenerate
Tb11.v5.0185	8.12462	1395	hypothetical protein, conserved
Tb927.7.5050	8.12462	1396	hypothetical protein, conserved
Tb927.7.1310	8.12412	1397	hypothetical protein, conserved
Tb11.v5.0783	8.12394	1398	methionine aminopeptidase 2, putative
Tb927.10.1420	8.12394	1399	metallo-peptidase, Clan MG, Family M24
Tb927.10.13800	8.12387	1400	hypothetical protein, conserved
Tb927.11.3660	8.12344	1401	dynein light chain Tctex-type, putative
Tb927.9.10890	8.12316	1402	Regulatory subunit of type II PKA R-subunit, putative
Tb927.11.10200	8.12308	1403	hypothetical protein, conserved
Tb927.2.4090	8.12245	1404	signal recognition particle receptor beta subunit, putative
Tb11.v5.0624	8.1223	1405	retrotransposon hot spot protein (PHS), putative
Tb927.11.2520	8.1212	1406	UDP-n-acetylglucosamine pyrophosphorylase
Tb927.8.6580	8.12118	1407	Succinate dehydrogenase [ubiquinone] flavoprotein subunit, mitochondrial
Tb11.v5.0390	8.12114	1408	serine/threonine protein phosphatase 2A regulatory subunit, putative
Tb927.1.1380	8.12114	1409	serine/threonine protein phosphatase 2A regulatory subunit, putative
Tb927.10.790	8.12034	1410	vesicle-associated membrane protein, putative
Tb927.8.4060	8.12016	1411	Flagellum adhesion protein 2, putative
Tb927.11.13360	8.11878	1412	AAA ATPase, putative
Tb927.11.1400	8.11815	1413	hypothetical protein, conserved
Tb927.11.8380	8.11799	1414	NADPH--cytochrome P450 reductase, putative
Tb927.11.14200	8.11682	1415	ubiquitin-conjugating enzyme CDC34
Tb927.10.14530	8.1167	1416	19S proteasome non-atpase subunit 8
Tb927.6.1470	8.11642	1417	hypothetical protein, conserved
Tb927.9.5520	8.11628	1418	ubiquitin carboxyl-terminal hydrolase, putative
Tb927.11.6130	8.11624	1419	SKP1-like protein
Tb927.8.4610	8.11558	1420	Ras-related protein RabX1
Tb927.1.3110	8.11515	1421	soluble N-ethylmaleimide sensitive factor (NSF) attachment protein, putative
Tb927.11.14330	8.11391	1422	HECT-domain (ubiquitin-transferase), putative
Tb927.8.8280	8.11318	1423	hypothetical protein, conserved
Tb927.5.3210	8.11303	1424	small ubiquitin-related modifier
Tb927.9.9870	8.11299	1425	Kinesin-13 6, putative
Tb927.6.620	8.11257	1426	hypothetical protein, conserved
Tb927.10.7420	8.11248	1427	bromodomain factor 2 protein, putative
Tb927.11.2490	8.11245	1428	Unc104-like kinesin, putative
Tb927.11.14210	8.11233	1429	conserved protein
Tb927.5.4150	8.1116	1430	hypothetical protein, conserved
Tb927.4.1680	8.1113	1431	ZFP family member, putative
Tb11.v5.0742	8.11102	1432	proteasome beta-1 subunit, putative
Tb927.6.1260	8.11102	1433	proteasome beta-1 subunit, putative
Tb927.8.820	8.11074	1434	VID27 cytoplasmic protein, putative
Tb927.8.3840	8.11023	1435	hypothetical protein, conserved
Tb927.11.4320	8.11014	1436	Uncharacterized ACR, COG1678, putative
Tb927.10.5450	8.11011	1437	ISWI complex protein
Tb927.5.580	8.10949	1438	prefoldin subunit, putative
Tb927.11.3510	8.10884	1439	hypothetical protein, conserved
Tb927.5.950	8.10863	1440	monothiol glutaredoxin, putative
Tb927.8.4220	8.10622	1441	hypothetical protein, conserved
Tb927.9.1380	8.10483	1442	hypothetical protein, conserved
Tb927.2.1810	8.10465	1443	chromatin-remodeling complex atpase chain iswi
Tb927.8.1670	8.10452	1444	Serine/threonine-protein kinase NEK14, putative
Tb927.10.3280	8.10406	1445	60S ribosomal proteins L38, putative
Tb927.10.13950	8.10393	1446	tubulin-specific chaperone, putative
Tb927.8.1500	8.10343	1447	hypothetical protein, conserved
Tb927.11.8310	8.1034	1448	class I transcription factor A, subunit 4
Tb927.3.2420	8.10156	1449	Microsomal signal peptidase 12 kDa subunit (SPC12), putative
Tb927.9.7000	8.10018	1450	methyltransferase domain containing protein, putative
Tb927.5.780	8.1	1451	hypothetical protein, conserved
Tb927.9.10830	8.09868	1452	metal dependent 5'-nucleotidase
Tb927.6.4990	8.09802	1453	mitochondrial ATP synthase delta chain
Tb05.5K5.210	8.09723	1454	hypothetical protein
Tb927.5.4570	8.09723	1455	Flagellum adhesion protein 3
Tb927.10.15360	8.09678	1456	hypothetical protein, conserved
Tb927.7.6440	8.0966	1457	vesicle transport v-SNARE protein, putative
Tb927.10.1890	8.09621	1458	cysteine peptidase, Clan CA, family C2, putative
Tb927.7.2120	8.09606	1459	hypothetical protein, conserved
Tb927.10.7110	8.09536	1460	Myo-inositol 1-phosphate synthase
Tb927.8.5510	8.09511	1461	apurinic/apyrimidinic endonuclease, putative
Tb927.10.10030	8.09463	1462	hypothetical protein, conserved
Tb927.8.7270	8.09189	1463	Endoplasmic Reticulum-Golgi Intermediate Compartment (ERGIC)/Endoplasmic reticulum vesicle transporter, putative
Tb11.v5.0863	8.0915	1464	hypothetical protein, conserved
Tb927.8.4660	8.0915	1465	hypothetical protein, conserved
Tb927.8.2860	8.09087	1466	hypothetical protein, conserved
Tb927.7.6640	8.09035	1467	hypothetical protein, conserved
Tb927.11.14140	8.08974	1468	ethanolamine-phosphate cytidylyltransferase
Tb927.8.4810	8.08791	1469	prohibitin 1
Tb11.v5.0256	8.08768	1470	proteasome beta 3 subunit, putative
Tb927.11.7270	8.08768	1471	proteasome beta 3 subunit, putative
Tb927.8.1840	8.08721	1472	Sec7 domain containing protein, putative
Tb927.9.16490	8.08629	1473	variant surface glycoprotein (VSG), putative
Tb927.9.9630	8.08584	1474	TPR repeat/Tetratricopeptide repeat, putative
Tb927.10.5880	8.08548	1475	Proteophosphoglycan, putative
Tb927.1.4050	8.08457	1476	ser/thr protein phosphatase, putative
Tb927.7.2300	8.0839	1477	Nucleoporin NUP132
Tb927.9.4520	8.08376	1478	Mitochondrial-processing peptidase subunit beta
Tb927.11.8770	8.08265	1479	ATP-dependent RNA helicase FAL1, putative
Tb11.v5.0791	8.08217	1480	ABC transporter, putative
Tb927.10.3170	8.08217	1481	ABC transporter, putative
Tb927.8.6980	8.08115	1482	Flagellum attachment zone protein 14
Tb927.11.4800	8.08059	1483	clathrin coat assembly protein, putative
Tb927.11.10090	8.07941	1484	hypothetical protein, conserved
Tb927.6.4970	8.0786	1485	serine/arginine-rich protein specific kinase SRPK, putative
Tb11.v5.0208	8.07743	1486	invariant surface glycoprotein, putative
Tb927.5.310	8.07743	1487	invariant surface glycoprotein, putative
Tb927.8.3550	8.07711	1488	mitogen-activated protein kinase 3, putative
Tb927.2.5240	8.07369	1489	pre-mRNA splicing factor 19
Tb927.7.6980	8.07348	1490	Mono-functional DNA-alkylating methyl methanesulfonate N-term/CPSF A subunit region, putative
Tb927.2.5150	8.07199	1491	TPR-repeat protein, putative
Tb927.1.2230	8.07148	1492	small myristoylated protein 1-1
Tb11.v5.0826	8.07081	1493	expression site-associated gene (ESAG) protein, putative
Tb927.7.6860	8.07081	1494	expression site-associated gene 5 (ESAG5) protein, putative
Tb927.6.2720	8.06792	1495	calcium-binding protein, putative
Tb927.6.2690	8.06714	1496	ubiquitin carboxyl-terminal hydrolase, putative
Tb927.7.6610	8.06619	1497	hypothetical protein, conserved
Tb927.11.6280	8.06429	1498	pyruvate phosphate dikinase
Tb927.9.1980	8.06391	1499	hypothetical protein, conserved
Tb11.v5.0228	8.06357	1500	75 kDa invariant surface glycoprotein, putative
Tb927.5.390	8.06357	1501	75 kDa invariant surface glycoprotein, putative
Tb927.10.9890	8.06306	1502	hypothetical protein, conserved
Tb927.11.1370	8.06279	1503	Dithiol glutaredoxin 1
Tb927.3.4970	8.06261	1504	hypothetical protein, conserved
Tb927.11.14430	8.06247	1505	proteasome regulatory non-ATP-ase subunit
Tb927.11.5230	8.06244	1506	hypothetical protein, conserved
Tb927.9.9660	8.06231	1507	Mitochondrial import receptor subunit ATOM40
Tb927.10.11590	8.06186	1508	nicotinate phosphoribosyltransferase, putative
Tb927.11.16160	8.06091	1509	ATP binding protein-like protein
Tb927.10.7680	8.06056	1510	GTPase activating protein, putative
Tb927.6.600	8.05853	1511	ccr4-not transcription complex subunit
Tb927.11.10560	8.05733	1512	eukaryotic translation initiation factor 4 gamma 4
Tb927.8.8120	8.05677	1513	hypothetical protein, conserved
Tb927.6.3640	8.05559	1514	zinc finger of C3HC4-type, RING/B-box zinc finger, putative
Tb927.6.4800	8.05545	1515	hypothetical protein, conserved
Tb927.10.14810	8.05528	1516	multiprotein-bridging factor 1, putative
Tb927.11.9440	8.05385	1517	Component of motile flagella 63
Tb927.5.1680	8.05286	1518	hypothetical protein, conserved
Tb927.8.7650	8.0522	1519	amino acid transporter, putative
Tb927.8.7670	8.0522	1520	amino acid transporter, putative
Tb927.8.7690	8.0522	1521	amino acid transporter (pseudogene), putative
Tb927.11.6890	8.05143	1522	DNA repair and recombination helicase protein PIF1
Tb927.7.1430	8.05058	1523	leucine-rich repeat protein (LRRP), putative
Tb927.10.7350	8.05024	1524	hypothetical protein, conserved
Tb927.11.4680	8.05014	1525	SURF1 family, putative
Tb927.10.4690	8.05007	1526	dynein light chain, putative
Tb927.11.2260	8.0496	1527	Eukaryotic translation initiation factor 4E-1
Tb927.4.2880	8.04886	1528	Nucleoporin NUP225
Tb927.7.760	8.0485	1529	hypothetical protein, conserved
Tb927.7.1910	8.04809	1530	pyridoxal phosphate containing glycine decarboxylase, putative
Tb927.6.1500	8.0478	1531	alkyl-dihydroxyacetone phosphate synthase
Tb927.11.14460	8.04756	1532	ADP-ribosylation factor GTPase activating protein 1, putative
Tb927.9.6460	8.04685	1533	hypothetical protein, conserved
Tb927.11.15030	8.04636	1534	small GTPase
Tb11.v5.0773	8.04622	1535	hypothetical protein, conserved
Tb927.10.9700	8.04622	1536	Flagellum attachment zone protein 22
Tb927.10.12330	8.04614	1537	zinc finger protein family member, putative
Tb927.11.5040	8.04593	1538	leucine-rich repeat protein (LRRP), putative
Tb927.3.3200	8.04557	1539	Domain of unknown function (DUF4586), putative
Tb927.5.2290	8.04454	1540	ATP-dependent RNA helicase, putative
Tb08.27P2.400	8.04453	1541	expression site-associated gene 3 (ESAG3), degenerate
Tb927.11.19470	8.04453	1542	expression site-associated gene 3 (ESAG3), frameshifted and degenerate
Tb927.6.4740	8.04404	1543	importin-alpha re-exporter protein, putative
Tb927.11.14730	8.04322	1544	Metalloprotease M41 FtsH, putative
Tb927.6.1730	8.04279	1545	hypothetical protein, conserved
Tb927.5.3830	8.04221	1546	dihydroorotate dehydrogenase (fumarate)
Tb927.8.390	8.04218	1547	expression site-associated gene 3 (ESAG3), degenerate
Tb10.v4.0248	8.04193	1548	hypothetical protein
Tb927.10.6920	8.04193	1549	hypothetical protein
Tb927.11.8090	8.04189	1550	protein phosphatase 1, putative
Tb927.9.1880	8.03955	1551	WD domain, G-beta repeat, putative
Tb927.2.470	8.03825	1552	retrotransposon hot spot protein 4 (RHS4), putative
Tb927.9.3280	8.03791	1553	exopolyphosphatase
Tb927.3.5660	8.03551	1554	UDP-GlcNAc:alpha3-D-mannoside beta-1,2-N-acetylglucosaminyltransferase I
Tb927.11.8260	8.03506	1555	carbonic anhydrase-like protein
Tb927.9.7180	8.03332	1556	adenosine monophosphate deaminase, putative
Tb927.11.15760	8.03317	1557	GPI transamidase subunit Tta1
Tb927.4.1740	8.03306	1558	Component of motile flagella 41
Tb927.1.3300	8.03222	1559	Myotubularin-related protein, putative
Tb927.8.7170	8.03081	1560	inositol polyphosphate 1-phosphatase, putative
Tb927.5.890	8.03059	1561	oligosaccharyl transferase subunit, putative
Tb927.8.4870	8.03015	1562	Component of motile flagella 6
Tb927.10.7440	8.02968	1563	ATP-dependent RNA helicase MTR4
Tb927.8.6440	8.02779	1564	RNA-binding protein, putative
Tb927.6.3870	8.02713	1565	RNA-binding protein, putative
Tb927.9.12170	8.02669	1566	leucine-rich repeat protein (LRRP), putative
Tb11.v5.0234	8.02653	1567	ADP-ribosylation factor-like protein, putative
Tb927.10.5230	8.02653	1568	ADP-ribosylation factor-like protein 13, putative
Tb927.10.2950	8.02554	1569	hypothetical protein, conserved
Tb11.v5.0740	8.02535	1570	hypothetical protein, conserved
Tb927.5.1690	8.02535	1571	hypothetical protein, conserved
Tb927.10.2620	8.02509	1572	CS domain containing protein, putative
Tb927.7.900	8.0237	1573	hypothetical protein, conserved
Tb927.6.1950	8.02348	1574	N-acetyltransferase B complex (NatB) non catalytic subunit, putative
Tb927.7.4020	8.02048	1575	protein phosphatase 2C, putative
Tb927.11.2950	8.02039	1576	Nucleoporin NUP89
Tb927.2.4930	8.02033	1577	esterase, putative
Tb927.6.930	8.02032	1578	metacaspase MCA3
Tb927.11.5140	8.01946	1579	ubiquitin carboxyl-terminal hydrolase, putative
Tb927.9.14080	8.01915	1580	vesicle-associated membrane protein, putative
Tb927.9.12320	8.01885	1581	cystathione gamma lyase, putative
Tb927.3.4190	8.01882	1582	endosomal integral membrane protein, putative
Tb11.v5.0480	8.01723	1583	DNA-directed RNA polymerase, alpha subunit, putative
Tb927.10.15370	8.01723	1584	DNA-directed RNA polymerases I and III subunit RPAC1, putative
Tb927.7.6290	8.01651	1585	kinesin, putative
Tb11.0260	8.01588	1586	variant surface glycoprotein (VSG, pseudogene), putative
Tb927.11.19190	8.01588	1587	variant surface glycoprotein (VSG, pseudogene), putative
Tb927.9.3400	8.01474	1588	endo-beta-N-acetylglucosaminidase, putative
Tb927.4.4910	8.01414	1589	3,2-trans-enoyl-CoA isomerase, mitochondrial precursor, putative
Tb927.11.9470	8.01319	1590	ADP-ribosylation factor GTPase activating protein, putative
Tb927.11.6230	8.01265	1591	protein transport protein SEC61 subunit alpha, putative
Tb927.10.10280	8.01119	1592	microtubule-associated protein, putative
Tb927.9.1600	8.00957	1593	hypothetical protein, conserved
Tb927.10.2290	8.00836	1594	chaperone protein DnaJ, putative
Tb927.8.5580	8.00674	1595	N-terminal region of Chorein, a TM vesicle-mediated sorter/Integral peroxisomal membrane peroxin, putative
Tb927.10.8000	8.00665	1596	hypothetical protein, conserved
Tb927.9.11230	8.00479	1597	calmodulin-like protein, putative
Tb927.10.14610	8.00416	1598	leucine-rich repeat protein (LRRP), putative
Tb927.6.3290	8.00326	1599	intraflagellar transport protein 20
Tb927.4.2840	8.00181	1600	hypothetical protein, conserved
Tb927.2.4850	8.00102	1601	Phosducin, putative
Tb927.9.2590	8.00099	1602	hypothetical protein, conserved
Tb927.3.3170	8.00071	1603	SUMO-interacting motif-containing protein
Tb927.10.13860	8.00055	1604	GPI-anchor transamidase subunit 8 (GPI8)
Tb927.11.8030	7.99942	1605	hypothetical protein, conserved
Tb927.10.15350	7.99924	1606	histone H3 variant V
Tb927.11.15040	7.9991	1607	Chaperonin HSP60, mitochondrial
Tb927.5.1360	7.99718	1608	nucleoside 2-deoxyribosyltransferase
Tb927.11.10430	7.99644	1609	hypothetical protein, conserved
Tb927.9.6530	7.9962	1610	hypothetical protein
Tb927.11.10990	7.99547	1611	methylthioribose-1-phosphate isomerase, putative
Tb927.6.4090	7.99512	1612	chaperonin HSP60, mitochondrial precursor, putative
Tb927.3.2950	7.99477	1613	ribonuclease inhibitor- like protein
Tb927.5.3250	7.99408	1614	hypothetical protein, conserved
Tb11.v5.0697	7.99403	1615	Xaa-Pro aminopeptidase, putative
Tb927.3.2090	7.99403	1616	Xaa-Pro aminopeptidase, putative
Tb927.8.1560	7.99364	1617	hypothetical protein, conserved
Tb927.11.3290	7.9936	1618	Tripartite attachment complex protein 166
Tb11.v5.0387	7.99235	1619	cell-division control protein 2 homolog 6, putative
Tb927.11.1180	7.99235	1620	cdc2-related kinase 6, putative
Tb927.7.7000	7.99228	1621	hook complex protein, conserved
Tb927.3.4540	7.99161	1622	NOL1/NOP2/sun family, putative
Tb927.7.2700	7.99049	1623	NADH-cytochrome b5 reductase, putative
Tb927.11.11290	7.99026	1624	heat shock protein 70, putative
Tb927.1.2120	7.98779	1625	Calpain-like protein CALP1.3
Tb927.7.1060	7.98701	1626	ISWI complex protein
Tb11.v5.0218	7.98682	1627	hypothetical protein, conserved
Tb927.5.500	7.98682	1628	hypothetical protein, conserved
Tb927.8.1540	7.98681	1629	hypothetical protein, conserved
Tb927.7.2790	7.98613	1630	Component of motile flagella 10
Tb927.6.3630	7.98568	1631	sphingosine 1-phosphate lyase, putative
Tb927.9.5410	7.98477	1632	hypothetical protein, conserved
Tb927.11.4130	7.98473	1633	ubiquitin-like protein, putative
Tb927.9.11480	7.98469	1634	Enriched in surface-labeled proteome protein 9
Tb927.9.2075	7.9835	1635	hypothetical protein
Tb927.11.12410	7.98293	1636	kinetoplastid kinetochore protein 10
Tb927.11.370	7.98234	1637	repressor activator protein 1
Tb927.9.18120	7.98218	1638	variant surface glycoprotein (VSG, pseudogene), putative
Tb927.11.630	7.98199	1639	RNA polymerase I second largest subunit
Tb927.10.10340	7.98137	1640	structural maintenance of chromosome 2, putative
Tb927.10.12660	7.98084	1641	pumilio/PUF RNA binding protein 2
Tb11.v5.0723	7.98078	1642	DNA-directed rna polymerase I largest subunit, putative
Tb927.8.5090	7.98078	1643	DNA-directed RNA polymerase I largest subunit
Tb927.5.2620	7.97984	1644	hypothetical protein, conserved
Tb927.10.8080	7.97909	1645	Uncharacterized conserved protein (DUF2042), putative
Tb927.9.13320	7.97676	1646	hypothetical protein, conserved
Tb11.v5.0734	7.97534	1647	multidrug resistance-associated protein, putative
Tb927.4.2510	7.97534	1648	multidrug resistance-associated protein, putative
Tb927.11.7150	7.97518	1649	NGG1 interacting factor 3-like
Tb11.v5.0486	7.97502	1650	katanin, putative
Tb927.10.1210	7.97502	1651	katanin, putative
Tb927.10.3500	7.97358	1652	splicing factor u2af 65 kda subunit
Tb927.9.4080	7.97354	1653	Stumpy formation signalling pathway protein, putative
Tb11.v5.0639	7.97331	1654	hypothetical protein, conserved
Tb927.5.1230	7.97331	1655	hypothetical protein, conserved
Tb927.6.3090	7.9733	1656	microtubule associated protein xmap215
Tb927.11.500	7.97326	1657	RNA-binding protein, UBP1
Tb927.11.510	7.97326	1658	RNA-binding protein, UBP2
Tb927.7.4390	7.97124	1659	threonine synthase, putative
Tb927.8.2200	7.97076	1660	terbinafine resistance locus protein (yip1), putative
Tb11.v5.0342	7.96946	1661	chaperone protein DnaJ, putative
Tb927.10.5040	7.96946	1662	chaperone protein DnaJ, putative
Tb11.v5.0807	7.96926	1663	ribonuclease, putative
Tb927.9.13510	7.96926	1664	Poly(A)-specific ribonuclease PARN-3
Tb927.8.1440	7.9692	1665	maoC-like dehydratase, putative
Tb927.11.11850	7.96913	1666	splicing factor 3B subunit 1, putative
Tb927.10.4040	7.96904	1667	3-keto-dihydrosphingosine reductase
Tb927.10.13960	7.96832	1668	paralyzed flagella protein 20
Tb927.11.4420	7.96784	1669	hypothetical protein, conserved
Tb927.11.16400	7.96652	1670	kinetoplast-associated protein 3, putative
Tb927.7.470	7.96623	1671	Enriched in surface-labeled proteome protein 14
Tb11.1240	7.96537	1672	methionine aminopeptidase, type I, putative
Tb11.v5.0998	7.96537	1673	methionine aminopeptidase, putative
Tb927.10.15270	7.96537	1674	metallo- peptidase, Clan MG, Family M24
Tb11.v5.0665	7.96515	1675	hypothetical protein, conserved
Tb927.9.12990	7.96515	1676	hypothetical protein, conserved
Tb11.v5.0258	7.96508	1677	Sperm tail/Sperm tail C-terminal domain containing protein, putative
Tb927.11.7240	7.96508	1678	nexin-dynein regulatory complex 2
Tb927.7.2640	7.96443	1679	cytoskeleton associated protein, putative
Tb927.10.2470	7.964	1680	Cleft lip and palate transmembrane protein 1 (CLPTM1), putative
Tb927.11.11770	7.96328	1681	Eukaryotic translation initiation factor 4E-3
Tb927.6.3670	7.96322	1682	paraflagellar rod component, putative
Tb927.7.7250	7.96172	1683	Ankyrin repeats (3 copies), putative
Tb927.11.16480	7.96089	1684	enoyl-CoA hydratase/isomerase family protein, putative
Tb11.v5.0659	7.96043	1685	Eukaryotic translation initiation factor 4 gamma 3, putative
Tb927.8.4820	7.96043	1686	eukaryotic translation initiation factor 4 gamma 3
Tb927.3.1740	7.96021	1687	hypothetical protein, conserved
Tb927.9.3820	7.95987	1688	syntaxin, putative
Tb927.4.920	7.95948	1689	TPR repeat, putative
Tb927.10.4900	7.95947	1690	TPR-repeat-containing chaperone protein DNAJ, putative
Tb927.6.2460	7.9594	1691	ubiquitin fusion degradation protein 2, putative
Tb927.11.5050	7.95914	1692	fumarate hydratase, class I
Tb927.10.10010	7.95883	1693	mRNA turnover protein 4 homolog, putative
Tb927.10.1070	7.95813	1694	cdc2-related kinase 1
Tb927.11.1680	7.95807	1695	vesicular-fusion protein SEC18, putative
Tb927.6.4550	7.95799	1696	hypothetical protein, conserved
Tb11.v5.0731	7.95672	1697	65 kDa invariant surface glycoprotein, putative
Tb927.9.14470	7.9566	1698	ubiquitin carboxyl-terminal hydrolase, putative
Tb927.11.3870	7.95608	1699	katanin, putative
Tb927.9.3580	7.95599	1700	hypothetical protein, conserved
Tb927.10.1250	7.95528	1701	Aminoacyl-tRNA editing domain containing protein, putative
Tb927.10.3640	7.95473	1702	nuclear transmembrane protein, putative
Tb927.11.5910	7.95379	1703	WASH complex subunit 7, N-terminal/WASH complex subunit 7/WASH complex subunit 7, C-terminal, putative
Tb927.1.990	7.95245	1704	Enkuring domain-containig protein
Tb11.v5.0696	7.95209	1705	TerD domain containing protein, putative
Tb927.4.5000	7.95209	1706	TerD domain containing protein, putative
Tb927.8.7420	7.95209	1707	TerD domain containing protein, putative
Tb927.8.1740	7.95201	1708	Mitochondrial import inner membrane translocase subunit TIM62
Tb927.6.5010	7.95191	1709	hypothetical protein, conserved
Tb927.9.9810	7.95187	1710	hypothetical protein, conserved
Tb927.10.14520	7.95129	1711	Basal body protein
Tb927.11.14560	7.95128	1712	Cleavage and polyadenylation specificity factor CPSF160, putative
Tb927.10.5520	7.95069	1713	AmmeMemoRadiSam system protein B, putative
Tb927.7.210	7.95044	1714	Proline dehydrogenase, mitochondrial
Tb927.8.7720	7.95017	1715	hypothetical protein, conserved
Tb927.10.9870	7.94886	1716	Component of motile flagella 12
Tb927.10.5020	7.94836	1717	Eukaryotic translation initiation factor 4E type 5
Tb927.2.4060	7.94692	1718	Dynein intermediate chain 138
Tb927.9.11110	7.945	1719	U5 snRNA-associated splicing factor
Tb927.2.4520	7.94464	1720	hypothetical protein, conserved
Tb927.8.6920	7.94463	1721	hypothetical protein, conserved
Tb927.10.8640	7.94443	1722	Galactose oxidase, central domain containing protein, putative
Tb927.6.5030	7.944	1723	Component of motile flagella protein 46
Tb927.10.6630	7.94338	1724	ATP-dependent RNA helicase DBP2A, putative
Tb927.8.6200	7.94247	1725	tubulin folding cofactor D, putative
Tb927.2.5810	7.9419	1726	Holliday-junction resolvase-like of SPT6/SH2 domain containing protein, putative
Tb927.3.3850	7.94007	1727	COPII coat assembly protein sec16
Tb927.11.6430	7.93981	1728	hypothetical protein, conserved
Tb927.9.11330	7.93938	1729	proteasome beta 2 subunit, putative
Tb927.3.4270	7.93913	1730	hypothetical protein, conserved
Tb927.4.2760	7.93907	1731	Protein of unknown function (DUF3808), putative
Tb927.6.4210	7.93818	1732	aldehyde dehydrogenase, putative
Tb927.8.610	7.93737	1733	hypothetical protein, conserved
Tb927.9.13490	7.93654	1734	metallo-peptidase, Clan MG, Family M24
Tb927.4.3840	7.93517	1735	nucleolar protein, putative
Tb927.4.3400	7.93413	1736	hypothetical protein, conserved
Tb927.3.3540	7.93343	1737	Nucleoporin NUP53b
Tb927.7.2590	7.93222	1738	prefoldin, putative
Tb927.8.7950	7.93178	1739	Flagellar Member 4
Tb927.5.2140	7.93145	1740	regulator of nonsense transcripts 1
Tb927.1.5000	7.93142	1741	hypothetical protein, conserved
Tb927.10.6670	7.93001	1742	dynein light chain, putative
Tb927.7.2260	7.92915	1743	SEP domain containing protein, putative
Tb927.8.5970	7.92854	1744	Cullin 5, putative
Tb11.v5.0621	7.92828	1745	hypothetical protein, conserved
Tb927.9.14240	7.92828	1746	Nucleoporin NUP82
Tb927.3.5500	7.92799	1747	DNA-directed RNA polymerase II subunit 3, putative
Tb927.7.700	7.92778	1748	Nucleolar protein 74
Tb927.10.12360	7.92663	1749	hypothetical protein, conserved
Tb11.v5.0530	7.92614	1750	BSD domain containing protein, putative
Tb927.9.3630	7.92614	1751	BSD domain containing protein, putative
Tb927.5.3350	7.92612	1752	iron superoxide dismutase A, mitochondrial
Tb927.8.2290	7.9258	1753	hypothetical protein, conserved
Tb927.9.1350	7.92571	1754	hypothetical protein, conserved
Tb927.9.5460	7.92563	1755	Eukaryotic translation initiation factor 4 gamma 2
Tb927.11.9040	7.92507	1756	conserved protein
Tb927.3.5350	7.92404	1757	hypothetical protein, conserved
Tb927.8.4770	7.92379	1758	small GTP-binding protein Rab18
Tb927.1.4410	7.92299	1759	SUMO-interacting motif-containing protein
Tb927.4.380	7.92272	1760	WD domain, G-beta repeat, putative
Tb927.11.2790	7.92259	1761	Solute carrier (proton/amino acid symporter), TRAMD3 or PAT1, putative
Tb927.11.6420	7.92232	1762	hypothetical protein, conserved
Tb927.9.15000	7.92128	1763	proteasome complex subunit Rpn13 ubiquitin receptor, putative
Tb927.11.8230	7.92112	1764	hypothetical protein, conserved
Tb927.9.12700	7.92076	1765	phospholipase A1, putative
Tb927.1.4690	7.91931	1766	Protein arginine N-methyltransferase 1 catalytic subunit
Tb927.6.1920	7.91806	1767	hypothetical protein, conserved
Tb927.7.3120	7.91757	1768	small nuclear ribonucleoprotein SmD1
Tb927.7.5160	7.91707	1769	deoxyuridine triphosphatase, putative
Tb927.11.2250	7.91666	1770	conserved protein, unknown function
Tb927.3.2440	7.91653	1771	AGC essential kinase 1
Tb11.v5.0572	7.91616	1772	RAD50 DNA repair-like protein, putative
Tb11.v5.0573	7.91616	1773	RAD50 DNA repair-like protein, putative
Tb927.11.8210	7.91616	1774	RAD50 DNA repair-like protein
Tb927.3.3820	7.91328	1775	hypothetical protein, conserved
Tb927.11.13270	7.91216	1776	hypothetical protein, conserved
Tb927.9.15050	7.9116	1777	nexin-dynein regulatory complex 4
Tb927.8.1290	7.91108	1778	SUMO-interacting motif-containing protein
Tb11.v5.0154	7.91105	1779	WD domain, G-beta repeat, putative
Tb11.v5.0427	7.911	1780	peroxisome assembly protein, putative
Tb927.10.15850	7.911	1781	Peroxisome biogenesis factor 12
Tb927.11.15930	7.91017	1782	Sybindin-like family, putative
Tb927.8.1790	7.91017	1783	hypothetical protein, conserved
Tb927.3.4980	7.9087	1784	hypothetical protein, conserved, frameshift
Tb927.6.2940	7.90805	1785	phosphopantothenoylcysteine decarboxylase, putative
Tb927.9.2760	7.90803	1786	EB1-like C-terminal motif containing protein, putative
Tb927.9.5440	7.90803	1787	actin, putative
Tb927.2.4110	7.9072	1788	Mitochondrial-processing peptidase subunit alpha
Tb927.10.15660	7.9071	1789	hypothetical protein, conserved
Tb927.9.10570	7.90659	1790	predicted zinc finger protein
Tb927.8.5230	7.90624	1791	peptidyl-prolyl cis-trans isomerase, putative
Tb11.v5.0752	7.90608	1792	expression site-associated gene 3 (ESAG3) protein, putative
Tb927.5.5230	7.90608	1793	expression site-associated gene (ESAG, pseudogene), putative
Tb927.5.3120	7.90607	1794	eukaryotic translation initiation factor 2 beta subunit, putative
Tb927.10.14880	7.90591	1795	centrosomal protein of 104 kDa
Tb927.5.1940	7.90536	1796	hypothetical protein, conserved
Tb927.5.2530	7.90466	1797	RNA cytidine acetyltransferase
Tb927.10.2940	7.90461	1798	Soluble NSF attachment protein, SNAP, putative
Tb927.11.800	7.90319	1799	prefoldin subunit, putative
Tb927.8.6450	7.90268	1800	inhibitor of cysteine peptidase
Tb927.8.7820	7.90162	1801	'Cold-shock' DNA-binding domain containing protein, putative
Tb927.6.5080	7.90128	1802	Protein of unknown function (DUF3808), putative
Tb927.11.12560	7.90114	1803	hypothetical protein
Tb927.11.1820	7.90053	1804	translation initiation factor eIF2B delta subunit, putative
Tb927.10.3010	7.8999	1805	hook complex protein, conserved
Tb927.1.4180	7.89975	1806	leucine-rich repeat protein (LRRP), putative
Tb11.v5.0232	7.89963	1807	hypothetical protein, conserved
Tb927.10.5250	7.89963	1808	zinc finger protein family member, putative
Tb927.10.12030	7.89948	1809	hypothetical protein, conserved
Tb927.9.9520	7.89944	1810	zinc finger protein family member, putative
Tb927.9.1960	7.89933	1811	nitrilase, putative
Tb927.4.4310	7.899	1812	Nucleoporin NUP64
Tb927.4.1720	7.89893	1813	Nucleoside diphosphate kinase 3
Tb927.7.180	7.89888	1814	Trypanosomal VSG domain containing protein, putative
Tb927.11.12690	7.89869	1815	hypothetical protein, conserved
Tb927.1.2210	7.8986	1816	nucleosome assembly protein (NAP), putative
Tb927.10.5400	7.8975	1817	hypothetical protein, conserved
Tb11.v5.0733	7.8967	1818	dynein heavy chain, cytosolic, putative
Tb927.7.3160	7.8967	1819	Cytoplasmic dynein 1 heavy chain (DYNC1H1), putative
Tb927.11.6050	7.89631	1820	Flagellar-associated PapD-like, putative
Tb927.8.3520	7.89464	1821	hypothetical protein, conserved
Tb927.10.13670	7.89386	1822	serine/threonine protein phosphatase 5
Tb927.2.240	7.89354	1823	retrotransposon hot spot protein 5 (RHS5), putative
Tb927.5.1280	7.89317	1824	alanine racemase, putative
Tb927.4.2920	7.89281	1825	hypothetical protein, conserved
Tb927.9.11940	7.89156	1826	replication factor A protein 3, putative
Tb927.9.5890	7.89151	1827	solanesyl-diphosphate synthase, putative
Tb11.v5.0271	7.89138	1828	trypanin, putative
Tb927.10.6350	7.89138	1829	trypanin
Tb927.7.6340	7.89116	1830	hypothetical protein, conserved
Tb927.8.2380	7.89079	1831	ABC transporter, putative
Tb927.10.8060	7.88993	1832	SET domain containing protein, putative
Tb927.11.10620	7.88968	1833	hypothetical protein, conserved
Tb927.11.2770	7.88924	1834	hypothetical protein, conserved
Tb927.11.16740	7.88873	1835	chaperone protein DnaJ, putative
Tb11.v5.0707	7.88856	1836	hypothetical protein, conserved
Tb927.10.8650	7.88856	1837	ran binding protein, putative
Tb927.9.11140	7.8882	1838	hypothetical protein, conserved
Tb927.3.2475	7.888	1839	hypothetical protein
Tb927.11.11140	7.88701	1840	hypothetical protein
Tb927.4.2350	7.8868	1841	twinfilin
Tb927.2.4130	7.88633	1842	enoyl-CoA hydratase/Enoyl-CoA isomerase/3-hydroxyacyl-CoA dehydrogenase, putative
Tb927.9.8190	7.88615	1843	hypothetical protein, conserved
Tb927.4.1230	7.88609	1844	hypothetical protein
Tb927.8.990	7.88552	1845	RNA-binding protein 33 (RNA-binding motif protein 33)
Tb927.3.1990	7.88521	1846	Tetratricopeptide repeat, putative
Tb927.4.2260	7.88447	1847	centrin-1
Tb927.11.6250	7.88384	1848	Mitochondrial ATP synthase subunit, putative
Tb11.v5.0782	7.88266	1849	hypothetical protein, conserved
Tb927.2.3180	7.88266	1850	kinetoplast polyadenylation/uridylation factor 1
Tb927.4.4360	7.88259	1851	monoglyceride lipase, putative
Tb927.10.10830	7.88175	1852	RGG-containing protein 2
Tb927.8.5830	7.88116	1853	SMP-30/Gluconolaconase/LRE-like region, putative
Tb927.9.1970	7.88099	1854	syntaxin binding protein 1, putative
Tb927.11.13870	7.88061	1855	uncharacterized protein, PH0010 family/AmmeMemoRadiSam system protein A, putative
Tb927.7.5560	7.88001	1856	glucosamine-fructose-6-phosphate aminotransferase, putative
Tb927.7.2740	7.88	1857	hypothetical protein, conserved
Tb927.8.3950	7.87851	1858	hypothetical protein, conserved
Tb927.5.2720	7.87677	1859	zinc finger protein ZPR1
Tb927.8.2550	7.87528	1860	mitochondrial DNA primase
Tb11.v5.0821	7.87423	1861	receptor-type adenylate cyclase GRESAG 4, putative
Tb927.8.7940	7.87423	1862	receptor-type adenylate cyclase GRESAG 4, putative
Tb927.8.1710	7.87413	1863	protein phosphatase 2A, regulatory subunit B, putative
Tb927.8.3470	7.87395	1864	Vesicle transport v-SNARE protein N-terminus, putative
Tb927.9.15490	7.87268	1865	ADP-ribosylation factor GTPase activating protein, putative
Tb927.11.2140	7.8725	1866	cyclic nucleotide-binding domain containing protein, putative
Tb927.8.6330	7.87193	1867	WD domain, G-beta repeat/PFU (PLAA family ubiquitin binding), putative
Tb11.v5.0626	7.87141	1868	protein kinase, putative
Tb927.10.14800	7.87141	1869	mitogen-activated protein kinase 9, putative
Tb927.9.1770	7.87057	1870	Zn-finger in Ran binding protein and others/SPRY domain/HECT-domain (ubiquitin-transferase), putative
Tb927.5.3650	7.87041	1871	hypothetical protein, conserved
Tb927.4.4370	7.86985	1872	hypothetical protein, conserved
Tb927.11.330	7.86878	1873	Myosin-like protein 1
Tb927.11.14290	7.86763	1874	vacuolar sorting protein, putative
Tb927.10.5790	7.86739	1875	hypothetical protein, conserved
Tb927.3.5580	7.86738	1876	tryptophanyl-tRNA synthetase
Tb927.10.9330	7.8673	1877	hypothetical protein, conserved
Tb11.v5.0216	7.86709	1878	invariant surface glycoprotein, putative
Tb927.5.309b	7.86709	1879	invariant surface glycoprotein, putative
Tb927.11.10800	7.86676	1880	Domain of unknown function (DUF4496), putative
Tb927.1.860	7.86673	1881	transmembrane protein, putative
Tb11.v5.0502	7.86636	1882	hypothetical protein, conserved
Tb927.10.3920	7.86636	1883	hypothetical protein, conserved
Tb927.10.3900	7.86602	1884	CAMK/CAMKL family protein kinase, putative
Tb927.11.1960	7.86571	1885	leucine-rich repeat protein (LRRP), putative
Tb927.10.1830	7.86535	1886	syntaxin, putative
Tb927.11.8050	7.86491	1887	Sas10/Utp3/C1D family/Sas10 C-terminal domain containing protein, putative
Tb927.11.15230	7.86471	1888	cytosolic coat protein, putative
Tb927.10.6780	7.8643	1889	vacuolar protein sorting-associated protein 45, putative
Tb927.11.1110	7.86326	1890	calpain, putative
Tb11.v5.0819	7.86312	1891	kinesin, putative
Tb927.9.15470	7.86312	1892	kinesin, putative
Tb927.7.2390	7.86225	1893	Tripartite attachment complex protein 102
Tb927.4.2280	7.86217	1894	hypothetical protein, conserved
Tb927.7.3880	7.86198	1895	Basal body protein
Tb927.7.280	7.86156	1896	cyclophilin-type peptidyl-prolyl cis-trans isomerase, putative
Tb927.8.1080	7.86072	1897	centrin, putative
Tb927.7.7410	7.86021	1898	Trans-2-enoyl-ACP reductase 2, putative
Tb11.v5.0812	7.86017	1899	signal recognition particle protein, putative
Tb927.10.15520	7.86017	1900	signal recognition particle protein, putative
Tb11.v5.0444	7.85968	1901	hypothetical protein, conserved
Tb927.7.6670	7.85968	1902	hypothetical protein, conserved
Tb927.3.3280	7.85849	1903	vacuolar protein sorting-associated protein 4, putative
Tb927.7.3420	7.85848	1904	peptidyl-prolyl cis-trans isomerase, putative
Tb927.3.5420	7.85822	1905	protein transport protein Sec24
Tb927.1.2190	7.85807	1906	Raptor N-terminal CASPase like domain containing protein, putative
Tb927.10.9640	7.85796	1907	hypothetical protein, conserved
Tb927.7.6460	7.85769	1908	Defective in exine formation 1 homolog, putative
Tb927.10.14570	7.85694	1909	kinesin motor domain containing protein, putative
Tb11.v5.0749	7.8569	1910	structural maintenance of chromosome 4, putative
Tb927.10.740	7.8569	1911	structural maintenance of chromosome 4, putative
Tb927.3.4820	7.85651	1912	acyltransferase, putative
Tb927.8.3410	7.85561	1913	Inositol hexakisphosphate, putative
Tb927.10.7280	7.85552	1914	pre-mRNA splicing factor ATP-dependent RNA helicase, putative
Tb927.11.6920	7.85459	1915	hypothetical protein, conserved
Tb927.9.6450	7.85444	1916	peroxisomal membrane protein (Pex16), putative
Tb927.6.2760	7.85322	1917	hypothetical protein, conserved
Tb927.3.2220	7.85255	1918	eukaryotic translation initiation factor 3 subunit j
Tb11.02.5080b	7.85248	1919	Endoplasmic Reticulum-Golgi Intermediate Compartment (ERGIC)/Endoplasmic reticulum vesicle transporter, putative
Tb927.11.7213	7.85248	1920	Endoplasmic Reticulum-Golgi Intermediate Compartment (ERGIC)/Endoplasmic reticulum vesicle transporter, putative
Tb927.8.3660	7.85212	1921	protein transport protein SEC23
Tb927.10.3570	7.85202	1922	RNA editing exonuclease 2
Tb927.1.5110	7.85149	1923	expression site-associated gene 11 (ESAG11) protein, putative
Tb927.3.1210	7.85088	1924	protein transport protein Sec24
Tb927.11.13130	7.85047	1925	membrane-bound acid phosphatase 1 precursor
Tb927.7.6280	7.84969	1926	Domain of unknown function (DUF3508), putative
Tb927.11.4030	7.84802	1927	hypothetical protein, conserved
Tb927.10.9910	7.84769	1928	PSP1 C-terminal conserved region, putative
Tb927.6.1640	7.84703	1929	single strand-specific nuclease, putative
Tb927.6.1650	7.84703	1930	single strand-specific nuclease, putative
Tb927.1.3000	7.84702	1931	amidohydrolase, putative
Tb927.11.14970	7.84679	1932	hypothetical protein, conserved
Tb927.6.1870	7.84661	1933	Eukaryotic translation initiation factor 4E-4
Tb927.4.2700	7.84635	1934	Hydroxymethylglutaryl-CoA lyase, mitochondrial, putative
Tb927.10.9800	7.84541	1935	60S ribosomal protein L22
Tb927.8.3800	7.84496	1936	guanosine diphosphatase, putative
Tb927.11.4660	7.8442	1937	Kinesin-13 2
Tb927.2.1170	7.84412	1938	retrotransposon hot spot protein 5 (RHS5), putative
Tb927.5.520	7.8431	1939	stomatin-like protein, putative
Tb927.3.910	7.84295	1940	tubulin gamma chain
Tb927.9.4200	7.84278	1941	fatty acyl CoA synthetase 2
Tb927.11.8120	7.84207	1942	protein transport protein SEC13, putative
Tb927.7.1100	7.84195	1943	hypothetical protein, conserved
Tb927.5.2270	7.84106	1944	Component of motile flagella 44
Tb927.7.1420	7.8405	1945	hypothetical protein, conserved
Tb11.v5.0356	7.84017	1946	cytidine triphosphate synthase, putative
Tb927.1.1240	7.84017	1947	cytidine triphosphate synthase, putative
Tb927.4.1890	7.83932	1948	hypothetical protein, conserved
Tb927.10.4000	7.83881	1949	methylglutaconyl-CoA hydratase, mitochondrial precursor, putative
Tb927.8.5780	7.83746	1950	phosphatase of regenerating liver-type phosphatase, putative
Tb11.v5.0687	7.83632	1951	Pescadillo N-terminus/BRCA1 C Terminus (BRCT) domain containing protein, putative
Tb927.9.8200	7.83632	1952	Pescadillo N-terminus/BRCA1 C Terminus (BRCT) domain containing protein, putative
Tb927.11.14780	7.8357	1953	phosphomannose isomerase
Tb927.11.6790	7.8353	1954	Nucleolar protein 89
Tb927.9.3970	7.83492	1955	nicotinamidase, putative
Tb927.9.4040	7.83492	1956	nicotinamidase, putative
Tb927.6.3890	7.83478	1957	replication factor C, subunit 2, putative
Tb927.7.2660	7.83451	1958	zinc finger protein family member, putative
Tb927.10.7020	7.83439	1959	acid phosphatase, putative
Tb927.5.3260	7.83429	1960	WD domain, G-beta repeat, putative
Tb927.2.2970	7.83352	1961	mitochondrial carrier protein
Tb927.9.10530	7.83349	1962	Flagellum attachment zone protein 4
Tb927.8.1750	7.833	1963	Fe-S cluster assembly protein DRE2
Tb927.1.720	7.83272	1964	phosphoglycerate kinase
Tb927.11.15750	7.83203	1965	AMP deaminase, putative
Tb927.7.880	7.8319	1966	RNA-binding protein, putative
Tb927.11.10780	7.83174	1967	Voltage-dependent anion channel, putative
Tb927.11.10330	7.83111	1968	regulator of chromosome condensation 1-like protein
Tb927.9.12300	7.8311	1969	replication factor C, subunit 3, putative
Tb927.6.1320	7.83081	1970	cyclophilin-type peptidyl-prolyl cis-trans isomerase, putative
Tb927.6.1340	7.83081	1971	cyclophilin-type peptidyl-prolyl cis-trans isomerase, putative
Tb927.6.1360	7.83081	1972	cyclophilin-type peptidyl-prolyl cis-trans isomerase, putative
Tb927.6.1380	7.83081	1973	cyclophilin-type peptidyl-prolyl cis-trans isomerase, putative
Tb927.6.1400	7.83081	1974	cyclophilin-type peptidyl-prolyl cis-trans isomerase, putative
Tb927.11.3880	7.82978	1975	actin, putative
Tb927.10.520	7.82946	1976	Mitochondrial ATP synthase subunit, putative
Tb927.5.2960	7.82923	1977	phosphoribosylpyrophosphate synthetase, putative
Tb927.10.5010	7.82906	1978	Elongation factor G1, mitochondrial, putative
Tb927.7.7030	7.82856	1979	zinc-finger of a C2HC-type, putative
Tb927.11.15190	7.82848	1980	Domain of unknown function (DUF4200), putative
Tb927.10.15440	7.82796	1981	hypothetical protein, conserved
Tb927.10.10320	7.82753	1982	dynein light chain Tctex-type, putative
Tb927.7.5490	7.82743	1983	protein arginine n-methyltransferase 7
Tb927.10.3760	7.82663	1984	vacuolar ATP synthase subunit d, putative
Tb927.9.7080	7.82524	1985	hypothetical protein, conserved
Tb927.8.4460	7.82387	1986	Domain of Unknown Function (DUF1042), putative
Tb927.11.13300	7.82327	1987	Intraflagellar transport protein 25
Tb927.11.10900	7.82168	1988	Component of motile flagella 9
Tb927.8.2620	7.82135	1989	SUMO-interacting motif-containing protein
Tb927.10.4010	7.82082	1990	hypothetical protein, conserved
Tb927.9.12900	7.81966	1991	RNA polymerase-associated protein LEO1, putative
Tb927.11.4000	7.81954	1992	hypothetical protein, conserved
Tb927.7.7240	7.81828	1993	leucine-rich repeat protein (LRRP), putative
Tb927.10.13180	7.81817	1994	Nrap protein, putative
Tb927.7.1790	7.81804	1995	Adenine phosphoribosyltransferase, putative
Tb927.7.5230	7.81725	1996	lanosterol synthase
Tb927.3.2050	7.81713	1997	Minicircle replication factor 172
Tb927.10.5630	7.81632	1998	hypothetical protein, conserved
[truncated: 9,706 more rows]
