# Supplementary material for: Proteomic identification of the UDP-GlcNAc: PI α1–6 GlcNAc-transferase subunits of the glycosylphosphatidylinositol biosynthetic pathway of Trypanosoma brucei
Source: PLoS One. 2021 Mar 18;16(3):e0244699. doi: 10.1371/journal.pone.0244699 (PMC7971885; doi:10.1371/journal.pone.0244699)
Supplement: S2 File — (XLSX) [file pone.0244699.s004.xlsx]

## Sheet: Dataset
S2 File: Label free quantitiaive proteomics data.
Digitonin lysates of BSF Trypanosoma brucei TbGPI3-3Myc expressing and wild type cells were immunoprecipitated with anti-Myc agarose beads. Proteins eluted from the beads were fractionated by SDS-PAGE, analyzed by LC-MS/MS and the data processed by MaxQuant.
Proteins	Majority protein TrytripDB IDs	TritrypDB Protein Descriptions	Unique Peptide Counts	Unique Sequence Coverage [%]	Mol. weight [kDa]	Sequence length	Sequence lengths	-log10FDR	Signed-Rank	Experiment Rank of proteins (From this study)	BSF Intensity Rank	Rank Filter	Protein Descriptions (In this paper)
Tb11.v5.0765.1-p1;Tb927.2.1780:mRNA-p1	Tb11.v5.0765.1-p1;Tb927.2.1780:mRNA-p1	N-acetylglucosaminyl-phosphatidylinositol biosynthetic protein, putative	30;30	57.2	48.542	428	428;455	2	661.405	1	6474	12.6604	TbGPI3
Tb927.5.3680:mRNA-p1	Tb927.5.3680:mRNA-p1	GPI-GlcNAc transferase complex, PIG-H component, putative	8	46.5	28.818	256	256	2	441.432	2	7038	11.7809	TbGPI15
Tb927.10.10110:mRNA-p1	Tb927.10.10110:mRNA-p1	PIG-P, putative	5	48	16.504	148	148	2	341.436	3	6185	11.0096	TbGPI19
Tb927.10.6140:mRNA-p1;Tb11.v5.0206.1-p1	Tb927.10.6140:mRNA-p1;Tb11.v5.0206.1-p1	phosphatidylinositolN- acetylglucosaminyltransferase subunit c, putative	7;7	30.4	38.507	342	342;342	2	225.351	4	6798	10.7309	TbGPI2
Tb927.3.4570:mRNA-p1	Tb927.3.4570:mRNA-p1	N-acetylglucosamyl transferase component GPI1, putative	22	34.8	81.461	729	729	1.92082	191.344	5	5285	10.0458	TbGPI1
Tb927.3.2480:mRNA-p1	Tb927.3.2480:mRNA-p1	Arv1-like family, putative	7	26.6	28.745	252	252	1.92082	172.719	6	7149	10.2186	TbArv1
Tb927.2.2460:mRNA-p1	Tb927.2.2460:mRNA-p1	ubiquitin-conjugating enzyme E2, putative	3	16.7	22.569	198	198	1.66898	107.118	7	2538	8.50212	UbCE
Tb927.4.780:mRNA-p1	Tb927.4.780:mRNA-p1	Phosphatidylinositol N-acetylglucosaminyltransferase subunit Y, putative	2	18.8	10.089	85	85	1.60206	97.8685	8	7149	9.80353	TbERI1
Tb927.11.10770:mRNA-p1	Tb927.11.10770:mRNA-p1	VHS domain containing protein, putative	9	23.4	48.943	458	458	1.27303	74.9098	9	3255	8.49852	VHS domain containing protein, putative
Tb927.11.3660:mRNA-p1	Tb927.11.3660:mRNA-p1	dynein light chain Tctex-type, putative	2	36.2	13.273	116	116	1.27303	72.9847	10	1401	7.13031	dynein light chain Tctex-type, putative
Tb927.7.6230:mRNA-p1	Tb927.7.6230:mRNA-p1	ADP-ribosylation factor, putative	4	33.7	20.714	190	190	0.889107	50.767	11	2398	7.76818	ADP-ribosylation factor, putative
Tb927.8.7410:mRNA-p1;Tb927.4.5010:mRNA-p1	Tb927.8.7410:mRNA-p1;Tb927.4.5010:mRNA-p1	calreticulin, putative	7;7	14.7	45.021	395	395;395	0.798139	43.7325	12	112	3.22239	calreticulin, putative
Tb927.10.10130:mRNA-p1	Tb927.10.10130:mRNA-p1	mitochondrial RNA binding complex 1 subunit	4	10.6	61.046	545	545	0.73919	40.835	13	3042	7.87036	mitochondrial RNA binding complex 1 subunit
Tb927.9.11480:mRNA-p1	Tb927.9.11480:mRNA-p1	Enriched in surface-labeled proteome protein 9	9	25.3	62.474	561	561	0.73919	40.8002	14	1634	6.86684	Enriched in surface-labeled proteome protein 9
Tb927.7.3920:mRNA-p1	Tb927.7.3920:mRNA-p1	hypothetical protein, conserved	6	33.1	36.085	320	320	0.73919	40.4706	15	1275	6.40939	hypothetical protein, conserved
Tb927.10.640:mRNA-p1	Tb927.10.640:mRNA-p1	arginine N-methyltransferase, type II	6	9.9	86.74	784	784	0.73919	40.4209	16	6462	8.65777	arginine N-methyltransferase, type II
Tb927.6.2050:mRNA-p1	Tb927.6.2050:mRNA-p1	ribosome biogenesis regulatory protein (RRS1), putative	5	35.2	24.654	213	213	0.73919	38.4545	17	3594	7.72391	ribosome biogenesis regulatory protein (RRS1), putative
Tb927.4.1950:mRNA-p1	Tb927.4.1950:mRNA-p1	NADPH-dependent diflavin oxidoreductase 1	6	16.2	68.998	610	610	0.73919	38.1274	18	2405	7.0619	NADPH-dependent diflavin oxidoreductase 1
Tb927.7.3560:mRNA-p1	Tb927.7.3560:mRNA-p1	Component of motile flagella 7	7	4.9	199.21	1760	1760	0.567785	32.273	19	1065	5.80871	Component of motile flagella 7
Tb927.10.13730:mRNA-p1	Tb927.10.13730:mRNA-p1	60S ribosomal protein L7, putative	5	21.5	34.502	298	298	0.567785	32.0448	20	3208	7.32553	60S ribosomal protein L7, putative
Tb927.8.1450:mRNA-p1	Tb927.8.1450:mRNA-p1	hypothetical protein, conserved	6	17.2	53.349	477	477	0.567785	31.6121	21	4797	7.8356	hypothetical protein, conserved
Tb927.10.9260:mRNA-p1	Tb927.10.9260:mRNA-p1	hypothetical protein, conserved	4	23.8	35.617	324	324	0.567785	30.9776	22	3430	7.28456	hypothetical protein, conserved
Tb927.5.4410:mRNA-p1;Tb05.5K5.60:mRNA-p1	Tb927.5.4410:mRNA-p1;Tb05.5K5.60:mRNA-p1	hypothetical protein, conserved	5;5	36.7	23.593	218	218;218	0.391849	26.1308	23	4089	7.47397	hypothetical protein, conserved
Tb927.11.10810:mRNA-p1	Tb927.11.10810:mRNA-p1	pumillio/PUF RNA binding protein 11	20	31.4	94.498	846	846	0.391656	25.6793	24	4187	7.44674	pumillio/PUF RNA binding protein 11
Tb927.10.5300:mRNA-p1;Tb11.v5.0246.1-p1	Tb927.10.5300:mRNA-p1;Tb11.v5.0246.1-p1	eukaryotic translation initiation factor 6 (eIF-6), putative	6;6	45.6	26.925	248	248;248	0.391656	25.5418	25	1238	5.62994	eukaryotic translation initiation factor 6 (eIF-6), putative
Tb927.10.6020:mRNA-p1	Tb927.10.6020:mRNA-p1	hypothetical protein, conserved	2	17.4	18.564	178	178	0.382758	24.8166	26	2505	6.59016	hypothetical protein, conserved
Tb927.9.7670:mRNA-p1	Tb927.9.7670:mRNA-p1	hypothetical protein, conserved	5	35.3	26.419	235	235	0.382758	24.7188	27	2645	6.61416	hypothetical protein, conserved
Tb927.7.270:mRNA-p1	Tb927.7.270:mRNA-p1	Ribosome production factor 2 homolog	15	45.7	41.798	370	370	0.281324	22.2289	28	2122	6.24385	Ribosome production factor 2 homolog
Tb927.11.10030:mRNA-p1;Tb927.11.10025:mRNA-p1	Tb927.11.10030:mRNA-p1;Tb927.11.10025:mRNA-p1	60S ribosomal protein L29, putative	5;5	53.5	8.2224	71	71;71	0.24177	21.2166	29	1056	5.18641	60S ribosomal protein L29, putative
Tb927.11.2570:mRNA-p1	Tb927.11.2570:mRNA-p1	hypothetical protein, conserved	8	19	63.115	573	573	0.24177	21.1657	30	1111	5.21075	hypothetical protein, conserved
Tb927.10.11800:mRNA-p1	Tb927.10.11800:mRNA-p1	Axonemal inner arm dynein light chain, putative	8	26.3	42.092	373	373	0.24177	20.944	31	2173	6.13128	Axonemal inner arm dynein light chain, putative
Tb927.11.10000:mRNA-p1	Tb927.11.10000:mRNA-p1	Charged multivesicular body protein 3, putative	5	32	25.146	219	219	0.24177	20.4559	32	5767	7.49361	Charged multivesicular body protein 3, putative
Tb927.8.5860:mRNA-p1	Tb927.8.5860:mRNA-p1	mitochondrial ribosomal protein L17	2	13.3	35.06	301	301	0.24177	20.4202	33	6059	7.52047	mitochondrial ribosomal protein L17
Tb927.11.900:mRNA-p1	Tb927.11.900:mRNA-p1	isocitrate dehydrogenase, putative	11	32.9	46.77	413	413	0.239668	19.927	34	344	3.3388	isocitrate dehydrogenase, putative
Tb927.2.2390:mRNA-p1	Tb927.2.2390:mRNA-p1	hypothetical protein, conserved	6	48.4	16.796	161	161	0.239668	19.75	35	3349	6.58023	hypothetical protein, conserved
Tb927.10.15310:mRNA-p1;REV__Tb927.10.2600:mRNA-p1	Tb927.10.15310:mRNA-p1	hypothetical protein, conserved	8;1	23.5	47.654	451	451;584	0.239668	19.6783	36	2472	6.10154	hypothetical protein, conserved
Tb927.10.5840:mRNA-p1	Tb927.10.5840:mRNA-p1	translation elongation factor 1-beta, putative	6	46.8	21.959	201	201	0.239668	19.6667	37	324	3.1304	translation elongation factor 1-beta, putative
Tb927.10.11330:mRNA-p1	Tb927.10.11330:mRNA-p1	EF-hand domain pair, putative	3	14	25.083	228	228	0.239668	19.4307	38	4067	6.74182	EF-hand domain pair, putative
Tb927.7.4670:mRNA-p1;Tb11.v5.0152.1-p1	Tb927.7.4670:mRNA-p1;Tb11.v5.0152.1-p1	ribosomal RNA processing protein 4	5;4	22.9	32.715	301	301;330	0.239668	19.2055	39	3572	6.51711	ribosomal RNA processing protein 4
Tb927.10.3560:mRNA-p1	Tb927.10.3560:mRNA-p1	arginine N-methyltransferase, putative	7	21.9	42.121	389	389	0.238448	18.5827	40	922	4.52669	arginine N-methyltransferase, putative
Tb927.11.3930:mRNA-p1	Tb927.11.3930:mRNA-p1	hypothetical protein, conserved	4	14.7	44.141	395	395	0.238448	18.5496	41	5473	7.06056	hypothetical protein, conserved
Tb927.11.14390:mRNA-p1	Tb927.11.14390:mRNA-p1	hypothetical protein, conserved	2	11.3	29.643	265	265	0.238448	18.5393	42	4164	6.63144	hypothetical protein, conserved
Tb927.8.8120:mRNA-p1	Tb927.8.8120:mRNA-p1	hypothetical protein, conserved	2	11.2	30.085	268	268	0.238448	18.3768	43	1513	5.13693	hypothetical protein, conserved
Tb927.10.7710:mRNA-p1	Tb927.10.7710:mRNA-p1	40S ribosomal protein S8, putative	5	18.8	29.838	260	260	0.238448	17.9416	44	4390	6.64057	40S ribosomal protein S8, putative
Tb927.10.5540:mRNA-p1	Tb927.10.5540:mRNA-p1	hypothetical protein, conserved	7	28.8	30.445	271	271	0.238448	17.7074	45	4144	6.52496	hypothetical protein, conserved
Tb927.7.6360:mRNA-p1	Tb927.7.6360:mRNA-p1	histone H2A variant Z	3	30.7	18.667	179	179	0.238448	17.6918	46	805	4.12928	histone H2A variant Z
Tb927.6.3050:mRNA-p1	Tb927.6.3050:mRNA-p1	Aldehyde dehydrogenase 3, putative	13	36.6	59.689	543	543	0.238448	17.2953	47	1134	4.59262	Aldehyde dehydrogenase 3, putative
Tb927.3.720:mRNA-p1	Tb927.3.720:mRNA-p1	zinc finger protein 3	3	43.1	14.168	130	130	0.232073	16.9834	48	2803	5.86779	zinc finger protein 3
Tb927.5.860:mRNA-p1	Tb927.5.860:mRNA-p1	Selenoprotein T, putative	4	18.1	28.792	259	259	0.232073	16.8262	49	4834	6.62429	Selenoprotein T, putative
Tb927.11.6460:mRNA-p1	Tb927.11.6460:mRNA-p1	hypothetical protein, conserved	18	27.8	107.35	954	954	0.232073	16.8077	50	537	3.42492	hypothetical protein, conserved
Tb927.6.840:mRNA-p1	Tb927.6.840:mRNA-p1	hypothetical protein, conserved	9	34.2	38.157	351	351	0.216346	16.2236	51	2141	5.39164	hypothetical protein, conserved
Tb927.7.5250:mRNA-p1	Tb927.7.5250:mRNA-p1	hypothetical protein, conserved	6	10.5	75.855	730	730	0.216346	16.2077	52	5957	6.83993	hypothetical protein, conserved
Tb927.8.4480:mRNA-p1	Tb927.8.4480:mRNA-p1	hypothetical protein, conserved	3	23.9	28.604	264	264	0.216346	16.1695	53	3646	6.10418	hypothetical protein, conserved
Tb927.7.2160:mRNA-p1	Tb927.7.2160:mRNA-p1	hypothetical protein, conserved	5	21.1	37.233	341	341	0.216346	15.9074	54	3463	6.00292	hypothetical protein, conserved
Tb927.1.3030:mRNA-p1	Tb927.1.3030:mRNA-p1	KREL2	4	20.2	47.576	416	416	0.209398	15.592	55	3926	6.15748	KREL2
Tb927.6.3940:mRNA-p1	Tb927.6.3940:mRNA-p1	Autophagy-related protein 27, putative	4	25.3	39.208	364	364	0.193095	15.1576	56	1231	4.45826	Autophagy-related protein 27, putative
Tb927.6.1610:mRNA-p1	Tb927.6.1610:mRNA-p1	ribosomal RNA adenine dimethylase family protein, conserved	6	23.5	38.752	344	344	0.190737	15.0075	57	4458	6.28929	ribosomal RNA adenine dimethylase family protein, conserved
Tb927.11.4980:mRNA-p1	Tb927.11.4980:mRNA-p1	ATP-dependent DEAD/H RNA helicase, putative	9	21.5	65.274	601	601	0.190737	14.9658	58	2696	5.53862	ATP-dependent DEAD/H RNA helicase, putative
Tb927.9.14430:mRNA-p1	Tb927.9.14430:mRNA-p1	Casein kinase II	7	26.9	41.017	349	349	0.190737	14.9577	59	1235	4.38765	Casein kinase II
Tb927.7.3120:mRNA-p1	Tb927.7.3120:mRNA-p1	small nuclear ribonucleoprotein SmD1	2	30.2	11.713	106	106	0.187535	14.595	60	1768	4.88101	small nuclear ribonucleoprotein SmD1
Tb927.10.8920:mRNA-p1	Tb927.10.8920:mRNA-p1	ras-like small GTPase, putative	6	23.9	38.395	339	339	0.153279	13.9975	61	2864	5.55308	ras-like small GTPase, putative
Tb927.1.2730:mRNA-p1	Tb927.1.2730:mRNA-p1	conserved protein, unknown function	8	33.3	38.735	354	354	0.153279	13.931	62	3028	5.60995	conserved protein, unknown function
Tb927.5.3190:mRNA-p1	Tb927.5.3190:mRNA-p1	hypothetical protein, conserved	8	42.3	23.192	208	208	0.153279	13.865	63	2786	5.4667	hypothetical protein, conserved
Tb927.3.4840:mRNA-p1	Tb927.3.4840:mRNA-p1	ubiquitin carboxyl-terminal hydrolase, putative	9	14.2	81.752	731	731	0.153279	13.726	64	1141	4.15608	ubiquitin carboxyl-terminal hydrolase, putative
Tb927.6.3070:mRNA-p1	Tb927.6.3070:mRNA-p1	hypothetical protein, conserved	4	15.7	38.437	337	337	0.153279	13.6583	65	4022	5.95133	hypothetical protein, conserved
Tb927.11.3830:mRNA-p1	Tb927.11.3830:mRNA-p1	hypothetical protein, conserved	6	30.8	39.063	354	354	0.153279	13.6547	66	2845	5.42982	hypothetical protein, conserved
Tb927.7.3750:mRNA-p1	Tb927.7.3750:mRNA-p1	TFIIF-stimulated CTD phosphatase, putative	3	23.2	22.571	198	198	0.153279	13.4289	67	2893	5.43226	TFIIF-stimulated CTD phosphatase, putative
Tb927.6.4500:mRNA-p1	Tb927.6.4500:mRNA-p1	conserved repeat domain containing protein, putative	6	36.9	22.705	203	203	0.153279	13.3536	68	639	3.23221	conserved repeat domain containing protein, putative
Tb927.9.7180:mRNA-p1	Tb927.9.7180:mRNA-p1	adenosine monophosphate deaminase, putative	9	5.6	189.71	1690	1690	0.153279	13.3325	69	1556	4.4951	adenosine monophosphate deaminase, putative
Tb927.5.940:mRNA-p1	Tb927.5.940:mRNA-p1	NADH-dependent fumarate reductase, putative	5	7.4	87.388	811	811	0.153279	13.166	70	2190	4.96743	NADH-dependent fumarate reductase, putative
Tb927.10.2540:mRNA-p1	Tb927.10.2540:mRNA-p1	adenylate kinase, putative	3	18.8	25.656	229	229	0.153279	13.1505	71	4064	5.83894	adenylate kinase, putative
Tb927.3.3440:mRNA-p1	Tb927.3.3440:mRNA-p1	phytanoyl-CoA dioxygenase (PhyH), putative	3	9.6	39.176	345	345	0.153279	13.0313	72	4491	5.9629	phytanoyl-CoA dioxygenase (PhyH), putative
Tb927.10.15430:mRNA-p1	Tb927.10.15430:mRNA-p1	Ankyrin repeats (3 copies), putative	4	8.5	59.61	554	554	0.153279	13.0041	73	3074	5.39608	Ankyrin repeats (3 copies), putative
Tb927.3.1140:mRNA-p1	Tb927.3.1140:mRNA-p1	Surp module, putative	2	9.2	43.463	390	390	0.153279	12.9717	74	2759	5.22048	Surp module, putative
Tb927.8.3020:mRNA-p1	Tb927.8.3020:mRNA-p1	hypothetical protein, conserved	3	7.1	66.012	603	603	0.153279	12.8454	75	3673	5.61392	hypothetical protein, conserved
Tb927.3.3250:mRNA-p1	Tb927.3.3250:mRNA-p1	hypothetical protein, conserved	4	14.6	36.333	336	336	0.153279	12.7368	76	3051	5.32714	hypothetical protein, conserved
Tb927.10.8200:mRNA-p1	Tb927.10.8200:mRNA-p1	Ribosomal protein L1p/L10e family, putative	10	54.6	30.838	269	269	0.153279	12.7222	77	2086	4.75974	Ribosomal protein L1p/L10e family, putative
Tb927.5.600:mRNA-p1	Tb927.5.600:mRNA-p1	hypothetical protein, conserved	3	39.4	14.37	127	127	0.153279	12.7004	78	5501	6.14008	hypothetical protein, conserved
Tb927.3.2110:mRNA-p1;Tb927.10.8050:mRNA-p1;Tb927.4.820:mRNA-p1;Tb11.v5.0513.1-p1;Tb927.10.14270:mRNA-p1	Tb927.3.2110:mRNA-p1	Mitochondrial import inner membrane translocase subunit TIM50	6;1;1;1;1	14.7	47.205	423	423;266;381;466;677	0.153279	12.276	79	2547	5.0108	Mitochondrial import inner membrane translocase subunit TIM50
Tb927.7.3580:mRNA-p1	Tb927.7.3580:mRNA-p1	Serine/threonine-protein kinase NEK11, putative	4	7.7	66.54	596	596	0.153279	12.2234	80	5179	6.01653	Serine/threonine-protein kinase NEK11, putative
Tb927.11.11380:mRNA-p1	Tb927.11.11380:mRNA-p1	SUMO-interacting motif-containing protein	2	6	61.504	550	550	0.153279	12.1757	81	2267	4.80672	SUMO-interacting motif-containing protein
Tb927.10.7580:mRNA-p1	Tb927.10.7580:mRNA-p1	hypothetical protein, conserved	12	13.9	111.59	1010	1010	0.153279	12.138	82	3867	5.55945	hypothetical protein, conserved
Tb927.10.3010:mRNA-p1	Tb927.10.3010:mRNA-p1	hook complex protein, conserved	8	8.3	133.39	1223	1223	0.153279	12.0631	83	1805	4.44274	hook complex protein, conserved
Tb927.11.11980:mRNA-p1;Tb927.11.11975:mRNA-p1;Tb927.11.11965:mRNA-p1	Tb927.11.11980:mRNA-p1;Tb927.11.11975:mRNA-p1;Tb927.11.11965:mRNA-p1	cytoskeleton-associated protein 15	3;3;3	30.6	14.091	121	121;121;121	0.153279	11.9836	84	215	1.35588	cytoskeleton-associated protein 15
Tb927.3.5130:mRNA-p1	Tb927.3.5130:mRNA-p1	exonuclease, putative	7	22.5	44.197	378	378	0.153279	11.9336	85	4037	5.56968	exonuclease, putative
Tb927.11.9820:mRNA-p1	Tb927.11.9820:mRNA-p1	TZ ciliopathy protein (tectonic), putative	6	11.8	64.425	583	583	0.153279	11.8115	86	7149	6.37726	TZ ciliopathy protein (tectonic), putative
Tb927.5.770:mRNA-p1	Tb927.5.770:mRNA-p1	hypothetical protein, conserved	5	12.8	76.378	726	726	0.153279	11.7617	87	6509	6.22528	hypothetical protein, conserved
Tb927.10.12390:mRNA-p1	Tb927.10.12390:mRNA-p1	hypothetical protein, conserved	3	15.1	29.658	258	258	0.153279	11.6844	88	2739	4.96	hypothetical protein, conserved
Tb927.11.8970:mRNA-p1	Tb927.11.8970:mRNA-p1	ribose 5-phosphate isomerase, putative	7	56.1	16.957	155	155	0.153279	11.677	89	192	1.10923	ribose 5-phosphate isomerase, putative
Tb927.8.3010:mRNA-p1	Tb927.8.3010:mRNA-p1	hook complex protein, conserved	13	21.6	82.184	737	737	0.153279	11.5998	90	2635	4.87173	hook complex protein, conserved
Tb927.4.2230:mRNA-p1	Tb927.4.2230:mRNA-p1	dolichyl-P-Man:GDP-Man1GlcNAc2-PP-dolichyl alpha-1,3-mannosyltransferase, putative	3	8.8	57.013	509	509	0.153279	11.586	91	3271	5.16772	dolichyl-P-Man:GDP-Man1GlcNAc2-PP-dolichyl alpha-1,3-mannosyltransferase, putative
Tb927.10.9780:mRNA-p1	Tb927.10.9780:mRNA-p1	ATP-dependent DEAD/H RNA helicase, putative	12	18.6	97.494	878	878	0.153279	11.39	92	3549	5.26963	ATP-dependent DEAD/H RNA helicase, putative
Tb927.10.5310:mRNA-p1;Tb11.v5.0245.1-p1	Tb927.10.5310:mRNA-p1;Tb11.v5.0245.1-p1	SNF1-related protein kinases, putative	16;16	25.2	80.619	729	729;729	0.153279	11.2701	93	3211	5.10965	SNF1-related protein kinases, putative
Tb927.2.3180:mRNA-p1;Tb11.v5.0782.1-p1	Tb927.2.3180:mRNA-p1;Tb11.v5.0782.1-p1	kinetoplast polyadenylation/uridylation factor 1	14;11	16.9	114.38	1003	1003;724	0.153279	11.2147	94	1850	4.29872	kinetoplast polyadenylation/uridylation factor 1
Tb927.8.3550:mRNA-p1	Tb927.8.3550:mRNA-p1	mitogen-activated protein kinase 3, putative	15	47.7	42.672	371	371	0.153279	11.171	95	1488	3.9693	mitogen-activated protein kinase 3, putative
Tb927.10.9100:mRNA-p1;Tb11.v5.0680.1-p1	Tb927.10.9100:mRNA-p1;Tb11.v5.0680.1-p1	hypothetical protein, conserved	9;8	14.2	82.591	747	747;767	0.153279	11.1458	96	5861	5.93197	hypothetical protein, conserved
Tb927.6.3610:mRNA-p1	Tb927.6.3610:mRNA-p1	SET domain containing protein, putative	8	29.9	38.967	345	345	0.153279	11.1391	97	2669	4.78217	SET domain containing protein, putative
Tb927.8.6760:mRNA-p1;Tb927.8.6750:mRNA-p1	Tb927.8.6760:mRNA-p1;Tb927.8.6750:mRNA-p1	translationally-controlled tumor protein homolog, putative	3;2	30	19.35	170	170;170	0.153279	11.0474	98	818	3.06125	translationally-controlled tumor protein homolog, putative
Tb927.1.3110:mRNA-p1	Tb927.1.3110:mRNA-p1	soluble N-ethylmaleimide sensitive factor (NSF) attachment protein, putative	16	56.2	32.136	281	281	0.153279	10.9655	99	1421	3.84333	soluble N-ethylmaleimide sensitive factor (NSF) attachment protein, putative
Tb927.8.4450:mRNA-p1	Tb927.8.4450:mRNA-p1	RNA-binding protein, putative	9	22.9	47.214	428	428	0.142848	10.6908	100	2143	4.42156	RNA-binding protein, putative
Tb927.10.14330:mRNA-p1	Tb927.10.14330:mRNA-p1	Utp14 protein, putative	29	32.7	115.95	1040	1040	0.142312	10.623	101	3686	5.18963	Utp14 protein, putative
Tb927.10.11150:mRNA-p1	Tb927.10.11150:mRNA-p1	hypothetical protein, conserved	4	28.3	25.436	226	226	0.142312	10.6011	102	2639	4.69335	hypothetical protein, conserved
Tb927.10.15300:mRNA-p1;Tb11.v5.0515.1-p1	Tb927.10.15300:mRNA-p1;Tb11.v5.0515.1-p1	Calcium/calmodulin-dependent protein kinase kinase, putative	10;6	14.6	124.79	1154	1154;755	0.142312	10.5522	103	6026	5.87048	Calcium/calmodulin-dependent protein kinase kinase, putative
Tb927.10.920:mRNA-p1	Tb927.10.920:mRNA-p1	Ribosomal protein L1p/L10e family, putative	6	24.6	32.531	297	297	0.142312	10.5351	104	3625	5.12333	Ribosomal protein L1p/L10e family, putative
Tb927.5.1990.1:mRNA-p1;Tb927.5.1990.2:mRNA-p1	Tb927.5.1990.1:mRNA-p1;Tb927.5.1990.2:mRNA-p1	hypothetical protein, conserved	10;9	51.5	30.865	264	264;334	0.142312	10.4875	105	4849	5.52923	hypothetical protein, conserved
Tb927.10.1260:mRNA-p1	Tb927.10.1260:mRNA-p1	aspartyl-tRNA synthetase, putative	4	7.4	60.842	541	541	0.142312	10.4823	106	5232	5.62523	aspartyl-tRNA synthetase, putative
Tb927.11.7020:mRNA-p1	Tb927.11.7020:mRNA-p1	proteasome alpha 7 subunit, putative	5	36.8	27.865	247	247	0.142312	10.4461	107	657	2.61828	proteasome alpha 7 subunit, putative
Tb927.11.7740:mRNA-p1;Tb927.11.7707:mRNA-p1	Tb927.11.7740:mRNA-p1;Tb927.11.7707:mRNA-p1	dynein light chain, putative	3;3	29.6	13.077	115	115;125	0.142312	10.4256	108	1318	3.60925	dynein light chain, putative
Tb927.6.3760:mRNA-p1	Tb927.6.3760:mRNA-p1	kinetoplastid kinetochore protein 15	5	25.1	36.051	338	338	0.142312	10.395	109	5831	5.74134	kinetoplastid kinetochore protein 15
Tb927.11.540.1-p1;Tb927.11.540.2-p1	Tb927.11.540.1-p1;Tb927.11.540.2-p1	ABC transporter, mitochondrial, putative	7;7	13.4	72.968	665	665;691	0.142312	10.3615	110	2310	4.39232	ABC transporter, mitochondrial, putative
Tb11.v5.0524.1-p1;Tb927.1.790:mRNA-p1	Tb11.v5.0524.1-p1;Tb927.1.790:mRNA-p1	hypothetical protein, conserved	4;4	12.7	60.47	557	557;801	0.142312	10.3107	111	4409	5.31182	hypothetical protein, conserved
Tb927.10.2260:mRNA-p1	Tb927.10.2260:mRNA-p1	Ubiquitin family, putative	3	5.5	86.188	784	784	0.142312	10.3025	112	3201	4.83695	Ubiquitin family, putative
Tb927.6.2320:mRNA-p1;Tb927.6.2260:mRNA-p1	Tb927.6.2320:mRNA-p1;Tb927.6.2260:mRNA-p1	hypothetical protein, conserved	6;6	39.9	20.146	188	188;188	0.142312	10.2939	113	2814	4.63823	hypothetical protein, conserved
Tb927.11.9670:mRNA-p1	Tb927.11.9670:mRNA-p1	aminomethyltransferase, mitochondrial, putative	10	35.5	41.142	375	375	0.142312	10.2238	114	2192	4.26514	aminomethyltransferase, mitochondrial, putative
Tb927.11.4190:mRNA-p1	Tb927.11.4190:mRNA-p1	Metallopeptidase family M24, putative	8	19.9	59.057	538	538	0.142312	10.0881	115	2452	4.41425	Metallopeptidase family M24, putative
Tb927.10.14680:mRNA-p1	Tb927.10.14680:mRNA-p1	ribosome biogenesis protein, putative	8	29	35.673	307	307	0.142312	10.0833	116	2414	4.37923	ribosome biogenesis protein, putative
Tb927.5.1080:mRNA-p1	Tb927.5.1080:mRNA-p1	RNA-binding protein, putative	7	30	26.869	237	237	0.142312	10.0084	117	4660	5.31575	RNA-binding protein, putative
Tb927.6.2340:mRNA-p1;Tb927.6.2280:mRNA-p1	Tb927.6.2340:mRNA-p1;Tb927.6.2280:mRNA-p1	prefoldin subunit, putative	12;12	66.9	16.282	139	139;139	0.142312	9.9792	118	1220	3.37002	prefoldin subunit, putative
Tb927.11.7800:mRNA-p1	Tb927.11.7800:mRNA-p1	hypothetical protein, conserved	3	14.6	26.793	239	239	0.142312	9.94478	119	3792	4.99393	hypothetical protein, conserved
Tb927.11.13060:mRNA-p1	Tb927.11.13060:mRNA-p1	translation-associated element 2, putative	19	20	121.32	1100	1100	0.142312	9.86988	120	2961	4.62498	translation-associated element 2, putative
Tb927.3.2830:mRNA-p1	Tb927.3.2830:mRNA-p1	brix domain containing protein, putative	4	14.8	41.62	364	364	0.142312	9.77506	121	4604	5.24981	brix domain containing protein, putative
Tb927.11.11260:mRNA-p1	Tb927.11.11260:mRNA-p1	hypothetical protein, conserved	3	12.6	49.478	446	446	0.142312	9.75256	122	2455	4.33077	hypothetical protein, conserved
Tb927.3.4800:mRNA-p1	Tb927.3.4800:mRNA-p1	hypothetical protein, conserved	13	26	69.268	619	619	0.142312	9.72731	123	2646	4.42708	hypothetical protein, conserved
Tb927.6.4340:mRNA-p1	Tb927.6.4340:mRNA-p1	U6 snRNA-associated Sm-like protein LSm5p	4	46.2	12.791	117	117	0.142312	9.7146	124	2713	4.45148	U6 snRNA-associated Sm-like protein LSm5p
Tb927.5.1590:mRNA-p1	Tb927.5.1590:mRNA-p1	hypothetical protein, conserved	2	12.6	28.263	254	254	0.142312	9.705	125	4810	5.26604	hypothetical protein, conserved
Tb927.11.12310:mRNA-p1	Tb927.11.12310:mRNA-p1	cdc2-related kinase 12	23	38.1	84.57	769	769	0.142312	9.54922	126	4761	5.23977	cdc2-related kinase 12
Tb927.8.4690:mRNA-p1	Tb927.8.4690:mRNA-p1	hypothetical protein, conserved	6	66.1	13.31	124	124	0.142312	9.50599	127	4016	4.98286	hypothetical protein, conserved
Tb927.11.3790:mRNA-p1	Tb927.11.3790:mRNA-p1	hypothetical protein, conserved	15	57.5	32.372	292	292	0.142312	9.49991	128	2037	3.99223	hypothetical protein, conserved
Tb927.9.10680:mRNA-p1	Tb927.9.10680:mRNA-p1	RNA polymerase III RPC4, putative	4	17.5	35.455	326	326	0.142312	9.40342	129	4247	5.041	RNA polymerase III RPC4, putative
Tb927.9.13070:mRNA-p1	Tb927.9.13070:mRNA-p1	Heat shock factor binding 1 domain-containing protein	3	57.3	9.2493	82	82	0.142312	9.39723	130	514	1.98326	Heat shock factor binding 1 domain-containing protein
Tb927.9.3680:mRNA-p1	Tb927.9.3680:mRNA-p1	hypothetical protein, conserved	25	19.7	151.5	1366	1366	0.142312	9.39087	131	3046	4.53928	hypothetical protein, conserved
Tb927.11.8310:mRNA-p1	Tb927.11.8310:mRNA-p1	class I transcription factor A, subunit 4	9	33.5	42.733	388	388	0.142312	9.27571	132	1448	3.45545	class I transcription factor A, subunit 4
Tb11.v5.0620.1-p1	Tb11.v5.0620.1-p1	COG4 transport protein, putative	3	6.8	61.282	555	555	0.142312	9.26188	133	5882	5.46681	COG4 transport protein, putative
Tb927.5.530:mRNA-p1	Tb927.5.530:mRNA-p1	hypothetical protein, conserved	16	24.4	71.4	661	661	0.141457	9.13175	134	3843	4.84193	hypothetical protein, conserved
Tb927.3.3540:mRNA-p1	Tb927.3.3540:mRNA-p1	Nucleoporin NUP53b	7	27.6	52.878	511	511	0.141457	9.09901	135	1737	3.68557	Nucleoporin NUP53b
Tb927.11.7570:mRNA-p1	Tb927.11.7570:mRNA-p1	ATP-grasp domain containing protein, putative	8	12.6	81.262	725	725	0.141457	9.07967	136	3146	4.53184	ATP-grasp domain containing protein, putative
Tb927.5.2930:mRNA-p1	Tb927.5.2930:mRNA-p1	Mitochondrial ATP synthase subunit, putative	23	48.6	43.308	370	370	0.141457	9.07713	137	1390	3.34284	Mitochondrial ATP synthase subunit, putative
Tb927.10.15020:mRNA-p1;Tb11.v5.0633.1-p1	Tb927.10.15020:mRNA-p1;Tb11.v5.0633.1-p1	CMGC/DYRK protein kinase, putative	7;4	7.8	120.49	1095	1095;923	0.141457	9.01047	138	5153	5.22267	CMGC/DYRK protein kinase, putative
Tb927.8.4890:mRNA-p1	Tb927.8.4890:mRNA-p1	pol-associated gene 1	9	23.1	49.202	442	442	0.141066	8.94305	139	1059	2.92955	pol-associated gene 1
Tb927.7.1580:mRNA-p1	Tb927.7.1580:mRNA-p1	Vps52 / Sac2 family, putative	3	5.3	99.649	891	891	0.134683	8.83951	140	2126	3.92464	Vps52 / Sac2 family, putative
Tb927.2.3020:mRNA-p1	Tb927.2.3020:mRNA-p1	Component of motile flagella 76	12	13.6	118.83	1032	1032	0.134683	8.83002	141	2573	4.18968	Component of motile flagella 76
Tb11.v5.0507.1-p1;Tb927.10.15470:mRNA-p1	Tb11.v5.0507.1-p1;Tb927.10.15470:mRNA-p1	hypothetical protein, conserved	4;3	14.1	54.241	481	481;481	0.134683	8.82813	142	4208	4.88917	hypothetical protein, conserved
Tb927.4.2630:mRNA-p1	Tb927.4.2630:mRNA-p1	ATP-dependent DEAD/H RNA helicase, putative	12	17.3	94.94	843	843	0.134683	8.80372	143	3503	4.6145	ATP-dependent DEAD/H RNA helicase, putative
Tb927.6.3780:mRNA-p1	Tb927.6.3780:mRNA-p1	E3 ubiquitin-protein ligase, putative	4	10.9	54.783	479	479	0.134683	8.79326	144	3078	4.41785	E3 ubiquitin-protein ligase, putative
Tb927.11.13930:mRNA-p1	Tb927.11.13930:mRNA-p1	U3 small nucleolar ribonucleoprotein protein IMP3, putative	2	11.9	26.668	226	226	0.134683	8.784	145	4974	5.10028	U3 small nucleolar ribonucleoprotein protein IMP3, putative
Tb927.7.7170:mRNA-p1	Tb927.7.7170:mRNA-p1	CYC2-like cyclin, putative	2	4.1	78.963	724	724	0.134683	8.76212	146	6895	5.56151	CYC2-like cyclin, putative
Tb927.8.5680:mRNA-p1	Tb927.8.5680:mRNA-p1	Pyridoxal-dependent decarboxylase conserved domain containing protein, putative	5	8.9	66.873	607	607	0.134683	8.74618	147	5220	5.15016	Pyridoxal-dependent decarboxylase conserved domain containing protein, putative
Tb927.10.4130:mRNA-p1	Tb927.10.4130:mRNA-p1	NADH-ubiquinone oxidoreductase B13 subunit	3	15.5	31.032	265	265	0.134683	8.67433	148	5441	5.2002	NADH-ubiquinone oxidoreductase B13 subunit
Tb927.11.10390:mRNA-p1	Tb927.11.10390:mRNA-p1	hypothetical protein, conserved	4	6.9	85.626	770	770	0.134683	8.67246	149	5869	5.29973	hypothetical protein, conserved
Tb927.9.7210:mRNA-p1	Tb927.9.7210:mRNA-p1	mitochondrial exoribonuclease DSS-1	3	6.5	83.345	743	743	0.134683	8.63858	150	5507	5.19823	mitochondrial exoribonuclease DSS-1
Tb927.11.1560:mRNA-p1	Tb927.11.1560:mRNA-p1	1,2-Dihydroxy-3-keto-5-methylthiopentene dioxygenase, putative	5	16.6	37.611	331	331	0.134683	8.63776	151	723	2.25945	1,2-Dihydroxy-3-keto-5-methylthiopentene dioxygenase, putative
Tb927.8.8140:mRNA-p1	Tb927.8.8140:mRNA-p1	small GTP-binding rab protein, putative	6	13.6	68.285	632	632	0.134683	8.63285	152	2670	4.1347	small GTP-binding rab protein, putative
Tb927.10.4860:mRNA-p1	Tb927.10.4860:mRNA-p1	hypothetical protein, conserved	2	15.8	41.604	392	392	0.134683	8.4981	153	4748	4.95572	hypothetical protein, conserved
Tb927.11.10820:mRNA-p1	Tb927.11.10820:mRNA-p1	Casein kinase II subunit beta, putative	3	14.3	33.52	294	294	0.134683	8.47817	154	2615	4.08581	Casein kinase II subunit beta, putative
Tb927.5.2980:mRNA-p1	Tb927.5.2980:mRNA-p1	Exocyst complex component Sec3, putative	22	26.5	121.3	1081	1081	0.134683	8.47204	155	3112	4.3275	Exocyst complex component Sec3, putative
Tb927.10.6410:mRNA-p1	Tb927.10.6410:mRNA-p1	DNA mismatch repair protein MSH6, putative	14	16.4	110.32	997	997	0.134683	8.47077	156	3894	4.64163	DNA mismatch repair protein MSH6, putative
Tb927.7.1080:mRNA-p1	Tb927.7.1080:mRNA-p1	hypothetical protein, conserved	9	35.8	40.968	360	360	0.134683	8.37014	157	3516	4.4851	hypothetical protein, conserved
Tb927.11.8890:mRNA-p1	Tb927.11.8890:mRNA-p1	DNA-dependent RNA polymerases, putative	2	25.4	14.851	134	134	0.134683	8.27819	158	2446	3.95243	DNA-dependent RNA polymerases, putative
Tb927.9.7170:mRNA-p1	Tb927.9.7170:mRNA-p1	Mitochondrial ribosomal protein L47	5	14.2	53.98	471	471	0.13444	8.21168	159	4489	4.8193	Mitochondrial ribosomal protein L47
Tb927.9.11870:mRNA-p1	Tb927.9.11870:mRNA-p1	zinc finger protein, putative	6	30.5	31.314	285	285	0.13444	8.20256	160	3474	4.44045	zinc finger protein, putative
Tb927.11.3980:mRNA-p1	Tb927.11.3980:mRNA-p1	metallo-peptidase, Clan ME, Family M16	7	21.4	57.037	518	518	0.13444	8.19524	161	5871	5.18847	metallo-peptidase, Clan ME, Family M16
Tb927.1.4680:mRNA-p1	Tb927.1.4680:mRNA-p1	Kinetochore interacting protein 6	4	15.7	37.287	331	331	0.13444	8.14326	162	3432	4.40498	Kinetochore interacting protein 6
Tb927.3.3870:mRNA-p1	Tb927.3.3870:mRNA-p1	lipase domain protein, putative	2	1.8	138.19	1232	1232	0.13444	8.13496	163	4026	4.6264	lipase domain protein, putative
Tb927.7.7360:mRNA-p1	Tb927.7.7360:mRNA-p1	cdc2-related kinase 2	4	14.2	39.238	345	345	0.13444	8.11688	164	5204	4.98785	cdc2-related kinase 2
Tb927.10.2790:mRNA-p1	Tb927.10.2790:mRNA-p1	Conserved oligomeric complex COG6, putative	6	6.2	115.48	1068	1068	0.13444	8.11454	165	3193	4.27437	Conserved oligomeric complex COG6, putative
Tb927.10.600:mRNA-p1	Tb927.10.600:mRNA-p1	Mitochondrial ribosomal protein L29	6	16.8	62.775	541	541	0.13444	8.10247	166	4127	4.63584	Mitochondrial ribosomal protein L29
Tb927.8.1080:mRNA-p1	Tb927.8.1080:mRNA-p1	centrin, putative	2	26	21.791	196	196	0.13444	8.06611	167	1897	3.5058	centrin, putative
Tb11.v5.0268.1-p1;Tb927.7.4550:mRNA-p1;REV__Tb927.10.4170:mRNA-p1	Tb11.v5.0268.1-p1;Tb927.7.4550:mRNA-p1;REV__Tb927.10.4170:mRNA-p1	60S ribosomal protein-like, putative	2;2;1	25.1	19.423	183	183;183;2539	0.13444	8.02632	168	2903	4.11101	60S ribosomal protein-like, putative
Tb927.11.1700:mRNA-p1	Tb927.11.1700:mRNA-p1	hypothetical protein, conserved	4	9.5	61.63	570	570	0.13444	7.99655	169	2210	3.70895	hypothetical protein, conserved
Tb927.8.5970:mRNA-p1	Tb927.8.5970:mRNA-p1	Cullin 5, putative	4	7.1	84.834	742	742	0.13444	7.99496	170	1744	3.35879	Cullin 5, putative
Tb927.8.3890:mRNA-p1;Tb927.8.3900:mRNA-p1;Tb927.8.3880.1:mRNA-p1;Tb927.8.3880.2:mRNA-p1	Tb927.8.3890:mRNA-p1;Tb927.8.3900:mRNA-p1;Tb927.8.3880.1:mRNA-p1;Tb927.8.3880.2:mRNA-p1	hypothetical protein, conserved	5;5;3;3	14.8	35.627	325	325;370;241;303	0.13444	7.98717	171	3652	4.41662	hypothetical protein, conserved
Tb927.7.670:mRNA-p1	Tb927.7.670:mRNA-p1	hypothetical protein, conserved	3	4.7	89.064	825	825	0.13444	7.96443	172	7149	5.37726	hypothetical protein, conserved
Tb927.10.15800:mRNA-p1	Tb927.10.15800:mRNA-p1	actin related protein 2, putative	13	39.2	45.024	400	400	0.13444	7.93308	173	4681	4.75797	actin related protein 2, putative
Tb927.11.3280:mRNA-p1	Tb927.11.3280:mRNA-p1	Kinesin-13 5, putative	34	49.1	80.07	719	719	0.13444	7.92029	174	1371	2.97807	Kinesin-13 5, putative
Tb927.7.6980:mRNA-p1	Tb927.7.6980:mRNA-p1	Mono-functional DNA-alkylating methyl methanesulfonate N-term/CPSF A subunit region, putative	10	5.1	194.95	1834	1834	0.13444	7.87997	175	1490	3.08989	Mono-functional DNA-alkylating methyl methanesulfonate N-term/CPSF A subunit region, putative
Tb927.6.1720:mRNA-p1	Tb927.6.1720:mRNA-p1	hypothetical protein, conserved	5	6.7	82.444	764	764	0.13444	7.81616	176	2926	4.05528	hypothetical protein, conserved
Tb927.9.12750:mRNA-p1	Tb927.9.12750:mRNA-p1	hypothetical protein, conserved	6	20.7	38.624	343	343	0.13444	7.71931	177	5521	4.96311	hypothetical protein, conserved
Tb927.6.710:mRNA-p1	Tb927.6.710:mRNA-p1	dephospho-CoA kinase, putative	5	27	26.854	241	241	0.131955	7.66771	178	2057	3.53059	dephospho-CoA kinase, putative
Tb927.8.5290:mRNA-p1	Tb927.8.5290:mRNA-p1	WW domain containing protein, putative	10	22.4	67.435	617	617	0.12313	7.54218	179	2246	3.64933	WW domain containing protein, putative
Tb927.8.600:mRNA-p1	Tb927.8.600:mRNA-p1	Bucentaur or craniofacial development, putative	3	16.2	33.648	303	303	0.12313	7.53934	180	5451	4.92045	Bucentaur or craniofacial development, putative
Tb927.4.3840:mRNA-p1	Tb927.4.3840:mRNA-p1	nucleolar protein, putative	6	14	65.107	579	579	0.12313	7.53839	181	1735	3.26087	nucleolar protein, putative
Tb927.10.10160:mRNA-p1	Tb927.10.10160:mRNA-p1	Pentatricopeptide repeat protein (PPR), putative	2	14.9	31.781	288	288	0.12313	7.53373	182	3969	4.44677	Pentatricopeptide repeat protein (PPR), putative
Tb927.8.6390:mRNA-p1	Tb927.8.6390:mRNA-p1	lysophospholipase, putative	9	45	30.092	280	280	0.12313	7.48039	183	259	0.501108	lysophospholipase, putative
Tb927.10.14380:mRNA-p1	Tb927.10.14380:mRNA-p1	Hsp70 protein, putative	11	16.1	92.77	861	861	0.12313	7.45778	184	2506	3.76761	Hsp70 protein, putative
Tb927.9.14280:mRNA-p1	Tb927.9.14280:mRNA-p1	hypothetical protein, conserved	29	18.7	186.85	1708	1708	0.12313	7.42509	185	5392	4.86522	hypothetical protein, conserved
Tb927.10.7030:mRNA-p1	Tb927.10.7030:mRNA-p1	hypothetical protein, conserved	3	16.8	30.363	268	268	0.12313	7.42175	186	6630	5.15563	hypothetical protein, conserved
Tb927.6.4760:mRNA-p1	Tb927.6.4760:mRNA-p1	T-complex protein 11, putative	6	8.6	89.074	794	794	0.12313	7.41742	187	2099	3.48859	T-complex protein 11, putative
Tb927.8.6440:mRNA-p1	Tb927.8.6440:mRNA-p1	RNA-binding protein, putative	5	34.8	20.37	184	184	0.12313	7.39554	188	1564	3.05644	RNA-binding protein, putative
Tb927.3.1010:mRNA-p1	Tb927.3.1010:mRNA-p1	hypothetical protein, conserved	5	13.7	64.339	600	600	0.12313	7.37797	189	341	0.851386	hypothetical protein, conserved
Tb927.6.2470:mRNA-p1	Tb927.6.2470:mRNA-p1	hypothetical protein, conserved	6	12.8	54.648	492	492	0.12313	7.36484	190	7072	5.21805	hypothetical protein, conserved
Tb927.11.4010:mRNA-p1;Tb11.v5.0888.1-p1	Tb927.11.4010:mRNA-p1;Tb11.v5.0888.1-p1	hypothetical protein, conserved	5;3	4.8	127.42	1144	1144;519	0.12313	7.361	191	3847	4.33209	hypothetical protein, conserved
Tb927.6.2170:mRNA-p1	Tb927.6.2170:mRNA-p1	co-chaperone GrpE, putative	7	32.4	23.877	222	222	0.12313	7.35076	192	856	2.1565	co-chaperone GrpE, putative
Tb927.2.5860:mRNA-p1	Tb927.2.5860:mRNA-p1	hypothetical protein, conserved	6	17.4	133.74	1242	1242	0.12313	7.30379	193	7149	5.21107	hypothetical protein, conserved
Tb927.11.1050:mRNA-p1	Tb927.11.1050:mRNA-p1	ribosome production factor 1, putative	5	17.2	39.646	331	331	0.12313	7.26874	194	4025	4.37486	ribosome production factor 1, putative
Tb927.11.16340:mRNA-p1	Tb927.11.16340:mRNA-p1	Importin-beta N-terminal domain/HEAT-like repeat, putative	3	2.8	124.85	1149	1149	0.12313	7.23667	195	3085	3.98372	Importin-beta N-terminal domain/HEAT-like repeat, putative
Tb927.10.4600:mRNA-p1;Tb11.v5.0422.1-p1	Tb927.10.4600:mRNA-p1;Tb11.v5.0422.1-p1	predicted SET domain protein	6;6	14.9	51.527	457	457;466	0.12313	7.23615	196	3119	3.99216	predicted SET domain protein
Tb927.10.2120:mRNA-p1	Tb927.10.2120:mRNA-p1	U1 small nuclear ribonucleoprotein C, putative	2	16	21.782	194	194	0.12313	7.22896	197	5865	4.89586	U1 small nuclear ribonucleoprotein C, putative
Tb927.11.1400:mRNA-p1	Tb927.11.1400:mRNA-p1	hypothetical protein, conserved	9	11.5	94.046	845	845	0.12313	7.15513	198	1413	2.83519	hypothetical protein, conserved
Tb927.7.5300:mRNA-p1	Tb927.7.5300:mRNA-p1	C2 domain/Ankyrin repeats (3 copies), putative	4	7.6	73.05	708	708	0.12313	7.12832	199	3243	4.02649	C2 domain/Ankyrin repeats (3 copies), putative
Tb927.8.4160:mRNA-p1	Tb927.8.4160:mRNA-p1	hypothetical protein, conserved	10	9.6	135.52	1245	1245	0.12313	7.04928	200	3073	3.94158	hypothetical protein, conserved
Tb927.11.15460:mRNA-p1	Tb927.11.15460:mRNA-p1	ATP-dependent DEAD/H RNA helicase, putative	4	10.3	80.604	725	725	0.12313	7.03577	201	4197	4.38409	ATP-dependent DEAD/H RNA helicase, putative
Tb927.10.6260:mRNA-p1;Tb11.v5.0279.1-p1	Tb927.10.6260:mRNA-p1;Tb11.v5.0279.1-p1	ATP-dependent DEAD/H RNA helicase, putative	13;9	29	68.678	604	604;370	0.121312	6.98558	202	2689	3.73464	ATP-dependent DEAD/H RNA helicase, putative
Tb927.10.4900:mRNA-p1	Tb927.10.4900:mRNA-p1	TPR-repeat-containing chaperone protein DNAJ, putative	24	50.7	55.927	499	499	0.120142	6.9513	203	1690	3.05747	TPR-repeat-containing chaperone protein DNAJ, putative
Tb927.8.4290:mRNA-p1	Tb927.8.4290:mRNA-p1	Ribosome biogenesis protein Nop16, putative	2	13.1	22.468	191	191	0.118096	6.90677	204	5126	4.65119	Ribosome biogenesis protein Nop16, putative
Tb927.11.10620:mRNA-p1	Tb927.11.10620:mRNA-p1	hypothetical protein, conserved	3	18.3	22.449	191	191	0.116935	6.87556	205	1833	3.16051	hypothetical protein, conserved
Tb927.9.7650:mRNA-p1	Tb927.9.7650:mRNA-p1	ADP-ribosylation factor, putative	2	19.6	21.294	189	189	0.116935	6.87185	206	3753	4.18733	ADP-ribosylation factor, putative
Tb927.8.8330:mRNA-p1;Tb927.4.3950:mRNA-p1	Tb927.8.8330:mRNA-p1	cysteine peptidase, putative	20;5	25.8	98.456	888	888;853	0.113154	6.80035	207	167	-0.309783	cysteine peptidase, putative
Tb927.10.930:mRNA-p1	Tb927.10.930:mRNA-p1	hypothetical protein, conserved	3	6.5	68.584	645	645	0.111697	6.76461	208	4252	4.35349	hypothetical protein, conserved
Tb927.11.10740:mRNA-p1	Tb927.11.10740:mRNA-p1	vacuolar sorting-associated protein-like, putative	3	17	25.189	218	218	0.111624	6.74029	209	4363	4.38375	vacuolar sorting-associated protein-like, putative
Tb927.11.14960:mRNA-p1	Tb927.11.14960:mRNA-p1	pumilio/PUF RNA binding protein 7, putative	22	36.1	78.663	704	704	0.111624	6.73513	210	2139	3.34848	pumilio/PUF RNA binding protein 7, putative
Tb927.9.10140:mRNA-p1	Tb927.9.10140:mRNA-p1	Uncharacterised conserved protein, putative	4	6.2	91.822	821	821	0.111624	6.7146	211	5557	4.71899	Uncharacterised conserved protein, putative
Tb927.9.4300:mRNA-p1	Tb927.9.4300:mRNA-p1	PRP3, putative	15	39.3	63.234	560	560	0.111624	6.70686	212	3885	4.19578	PRP3, putative
Tb927.9.3640:mRNA-p1	Tb927.9.3640:mRNA-p1	LSU ribosomal protein, mitochondrial, putative	2	10.1	22.632	198	198	0.111624	6.67194	213	4964	4.54258	LSU ribosomal protein, mitochondrial, putative
Tb927.6.2020:mRNA-p1	Tb927.6.2020:mRNA-p1	Bardet-Biedl syndrome 2 protein	8	12.2	81.2	745	745	0.111624	6.65389	214	3814	4.15562	Bardet-Biedl syndrome 2 protein
Tb927.6.4160.2:mRNA-p1;Tb927.6.4160.1:mRNA-p1	Tb927.6.4160.2:mRNA-p1;Tb927.6.4160.1:mRNA-p1	hypothetical protein, conserved	4;3	16.9	38.955	362	362;296	0.111624	6.64589	215	7113	5.04805	hypothetical protein, conserved
Tb927.11.16890:mRNA-p1	Tb927.11.16890:mRNA-p1	Tetratricopeptide-like helical domain containing protein	11	7.8	228.84	2059	2059	0.111624	6.64465	216	1247	2.52936	Tetratricopeptide-like helical domain containing protein
Tb927.4.2130:mRNA-p1	Tb927.4.2130:mRNA-p1	hypothetical protein, conserved	2	8.8	34.796	318	318	0.111624	6.61534	217	4732	4.44668	hypothetical protein, conserved
Tb927.4.1340:mRNA-p1	Tb927.4.1340:mRNA-p1	cleavage and polyadenylation specificity factor subunit, putative	12	20.6	85.313	770	770	0.111624	6.60805	218	2050	3.23322	cleavage and polyadenylation specificity factor subunit, putative
Tb927.10.9420:mRNA-p1	Tb927.10.9420:mRNA-p1	mitochondrial chaperone BCS1, putative	6	13	59.563	532	532	0.111624	6.58403	219	5223	4.57588	mitochondrial chaperone BCS1, putative
Tb927.11.3100:mRNA-p1	Tb927.11.3100:mRNA-p1	Present in the outer mitochondrial membrane proteome 13	7	22.9	39.598	362	362	0.111624	6.55512	220	4879	4.47101	Present in the outer mitochondrial membrane proteome 13
Tb927.10.15950:mRNA-p1;Tb11.v5.0305.1-p1	Tb927.10.15950:mRNA-p1;Tb11.v5.0305.1-p1	TATA-box-binding protein	4;4	19.1	28.822	262	262;262	0.111624	6.54172	221	5459	4.62652	TATA-box-binding protein
Tb927.11.4550:mRNA-p1	Tb927.11.4550:mRNA-p1	Domain of unknown function (DUF4200), putative	7	25.8	35.629	299	299	0.111624	6.53383	222	2297	3.37112	Domain of unknown function (DUF4200), putative
Tb927.11.4040:mRNA-p1	Tb927.11.4040:mRNA-p1	hypothetical protein, conserved	3	15.2	29.916	276	276	0.111624	6.47979	223	6372	4.83663	hypothetical protein, conserved
Tb927.7.3070:mRNA-p1	Tb927.7.3070:mRNA-p1	UAA transporter family, putative	4	7.8	54.85	498	498	0.111624	6.47259	224	3257	3.86197	UAA transporter family, putative
Tb927.9.5680:mRNA-p1	Tb927.9.5680:mRNA-p1	inositol/phosphatidylinositol phosphatase, putative	7	9.3	87.964	784	784	0.111624	6.45882	225	3353	3.89746	inositol/phosphatidylinositol phosphatase, putative
Tb927.11.4700:mRNA-p1	Tb927.11.4700:mRNA-p1	prostaglandin f synthase	4	21	30.992	276	276	0.111624	6.41163	226	371	0.715096	prostaglandin f synthase
Tb927.5.1860:mRNA-p1	Tb927.5.1860:mRNA-p1	hypothetical protein, conserved	3	11.4	55.437	509	509	0.111624	6.40878	227	3940	4.11743	hypothetical protein, conserved
Tb927.1.4520:mRNA-p1	Tb927.1.4520:mRNA-p1	Zinc finger, C3HC4 type (RING finger), putative	6	9.4	83.438	731	731	0.111624	6.40863	228	5291	4.53643	Zinc finger, C3HC4 type (RING finger), putative
Tb927.9.9310:mRNA-p1	Tb927.9.9310:mRNA-p1	hypothetical protein, conserved	5	5.7	106.49	966	966	0.102087	6.25954	229	2593	3.5012	hypothetical protein, conserved
Tb927.1.3880:mRNA-p1	Tb927.1.3880:mRNA-p1	Fusaric acid resistance protein-like, putative	15	13.7	188.01	1737	1737	0.101538	6.23833	230	5386	4.54951	Fusaric acid resistance protein-like, putative
Tb927.11.6810:mRNA-p1;Tb11.v5.0901.1-p1	Tb927.11.6810:mRNA-p1	tubulin-tyrsoine ligase-like protein, putative	15;4	18.5	108.44	980	980;266	0.101538	6.23727	231	2262	3.29163	tubulin-tyrsoine ligase-like protein, putative
Tb927.10.8730:mRNA-p1	Tb927.10.8730:mRNA-p1	ABC1 family, putative	3	9.3	60.62	529	529	0.101308	6.20184	232	2633	3.50451	ABC1 family, putative
Tb927.5.3450:mRNA-p1	Tb927.5.3450:mRNA-p1	eukaryotic translation initiation factor eIF2A, putative	4	8.5	57.992	527	527	0.100464	6.17784	233	802	1.78327	eukaryotic translation initiation factor eIF2A, putative
Tb927.11.7550:mRNA-p1	Tb927.11.7550:mRNA-p1	hypothetical protein, conserved	3	17.6	24.504	221	221	0.100464	6.17571	234	2958	3.66004	hypothetical protein, conserved
Tb927.8.5520:mRNA-p1	Tb927.8.5520:mRNA-p1	hypothetical protein, conserved	4	26.1	19.535	184	184	0.100464	6.1738	235	3844	4.03188	hypothetical protein, conserved
Tb927.4.1330:mRNA-p1	Tb927.4.1330:mRNA-p1	DNA topoisomerase IB, large subunit	22	35.5	79.257	696	696	0.100464	6.17118	236	1075	2.18748	DNA topoisomerase IB, large subunit
Tb927.1.1980:mRNA-p1	Tb927.1.1980:mRNA-p1	protein transport protein YIF1, putative	4	15.3	34.251	300	300	0.100464	6.14614	237	6338	4.74107	protein transport protein YIF1, putative
Tb927.10.15940:mRNA-p1;Tb11.v5.0304.1-p1	Tb927.10.15940:mRNA-p1;Tb11.v5.0304.1-p1	cation transporter, putative	14;11	26.8	51.354	471	471;366	0.100464	6.14031	238	3624	3.92855	cation transporter, putative
Tb927.11.15000:mRNA-p1	Tb927.11.15000:mRNA-p1	survival of motor neuron (SMN)-like protein	4	38.9	17.026	157	157	0.100464	6.10387	239	3037	3.66756	survival of motor neuron (SMN)-like protein
Tb927.7.4060:mRNA-p1;Tb927.7.4070:mRNA-p1	Tb927.7.4060:mRNA-p1;Tb927.7.4070:mRNA-p1	cysteine peptidase, Clan CA, family C2, putative	3;2	35.7	12.873	115	115;120	0.100464	6.10104	240	347	0.531901	cysteine peptidase, Clan CA, family C2, putative
Tb927.9.12710:mRNA-p1	Tb927.9.12710:mRNA-p1	hypothetical protein, conserved	6	23.1	44.783	394	394	0.0990106	6.04342	241	5744	4.57495	hypothetical protein, conserved
Tb927.10.10590:mRNA-p1;Tb927.10.10580:mRNA-p1;Tb927.10.10570:mRNA-p1;Tb927.10.10560:mRNA-p1;Tb927.10.10550:mRNA-p1;Tb927.10.10540:mRNA-p1;Tb927.10.10530:mRNA-p1;Tb927.10.10520:mRNA-p1;Tb927.10.10510:mRNA-p1;Tb927.10.10500:mRNA-p1;Tb927.10.10490:mRNA-p1;Tb927.10.10480:mRNA-p1;Tb927.10.10470:mRNA-p1;Tb927.10.10460:mRNA-p1;Tb927.10.10445:mRNA-p1	Tb927.10.10590:mRNA-p1;Tb927.10.10580:mRNA-p1;Tb927.10.10570:mRNA-p1;Tb927.10.10560:mRNA-p1;Tb927.10.10550:mRNA-p1;Tb927.10.10540:mRNA-p1;Tb927.10.10530:mRNA-p1;Tb927.10.10520:mRNA-p1;Tb927.10.10510:mRNA-p1;Tb927.10.10500:mRNA-p1;Tb927.10.10490:mRNA-p1;Tb927.10.10480:mRNA-p1;Tb927.10.10470:mRNA-p1;Tb927.10.10460:mRNA-p1;Tb927.10.10445:mRNA-p1	histone H2B, putative	8;8;8;8;8;8;8;8;8;8;8;8;8;8;8	58.9	12.569	112	112;112;112;112;112;112;112;112;112;112;112;112;112;112;112	0.0979209	6.01735	242	103	-1.23236	histone H2B, putative
Tb927.3.3300:mRNA-p1	Tb927.3.3300:mRNA-p1	Flagellum attachment zone protein 19	17	27.8	89.197	814	814	0.0979209	6.00995	243	534	1.13588	Flagellum attachment zone protein 19
Tb927.11.5590:mRNA-p1	Tb927.11.5590:mRNA-p1	Anaphase-promoting complex-associated protein AP1	17	29.4	82.5	749	749	0.0979209	6.00669	244	2716	3.47653	Anaphase-promoting complex-associated protein AP1
Tb927.9.6650:mRNA-p1	Tb927.9.6650:mRNA-p1	tRNA synthetases class II (A)/Threonyl and Alanyl tRNA synthetase second additional domain containing protein, putative	17	38.9	52.057	468	468	0.0979209	5.99739	245	3468	3.82325	tRNA synthetases class II (A)/Threonyl and Alanyl tRNA synthetase second additional domain containing protein, putative
Tb927.4.3420:mRNA-p1	Tb927.4.3420:mRNA-p1	wee1-like protein kinase	3	5.8	66.217	603	603	0.0979209	5.95284	246	5252	4.41614	wee1-like protein kinase
Tb927.9.7230:mRNA-p1	Tb927.9.7230:mRNA-p1	ADP-ribosylation factor-like protein, putative	2	13.5	21.093	193	193	0.0958798	5.91128	247	2569	3.37862	ADP-ribosylation factor-like protein, putative
Tb927.10.3430:mRNA-p1	Tb927.10.3430:mRNA-p1	hypothetical protein, conserved	2	4.1	68.706	617	617	0.0958798	5.89802	248	5159	4.37868	hypothetical protein, conserved
Tb927.3.4120:mRNA-p1	Tb927.3.4120:mRNA-p1	hypothetical protein, conserved	4	8.4	73.301	677	677	0.0904814	5.83167	249	3887	3.96444	hypothetical protein, conserved
Tb927.7.1460:mRNA-p1	Tb927.7.1460:mRNA-p1	hypothetical protein, conserved	3	2.9	106.23	968	968	0.0904814	5.82657	250	4000	4	hypothetical protein, conserved
Tb927.6.5000:mRNA-p1	Tb927.6.5000:mRNA-p1	Protein of unknown function (DUF773), putative	5	12.4	44.275	394	394	0.0904814	5.82274	251	2469	3.29817	Protein of unknown function (DUF773), putative
Tb927.8.1570:mRNA-p1	Tb927.8.1570:mRNA-p1	Uncharacterised protein family (UPF0172), putative	5	27.9	28.825	272	272	0.0904814	5.80831	252	1303	2.37034	Uncharacterised protein family (UPF0172), putative
Tb927.11.6820:mRNA-p1;Tb11.v5.0900.1-p1	Tb927.11.6820:mRNA-p1;Tb11.v5.0900.1-p1	hypothetical protein, conserved	2;1	6.8	51.6	473	473;333	0.0904814	5.77015	253	2377	3.23193	hypothetical protein, conserved
Tb927.11.3350:mRNA-p1	Tb927.11.3350:mRNA-p1	phospholipid-transporting ATPase 1-like protein, putative	9	12.3	126.55	1128	1128	0.0899362	5.74933	254	2631	3.37271	phospholipid-transporting ATPase 1-like protein, putative
Tb927.10.9840:mRNA-p1	Tb927.10.9840:mRNA-p1	chaperone protein DnaJ, putative	4	19.1	29.823	262	262	0.0899362	5.73356	255	2197	3.10697	chaperone protein DnaJ, putative
Tb927.7.5210:mRNA-p1	Tb927.7.5210:mRNA-p1	Putative Phosphatase/Protein of unknown function DUF89, putative	21	27.6	100.48	898	898	0.0899362	5.7292	256	1362	2.41151	Putative Phosphatase/Protein of unknown function DUF89, putative
Tb927.4.1440:mRNA-p1	Tb927.4.1440:mRNA-p1	probable rRNA maturation factor YbeY, putative	2	19	23.261	205	205	0.0891036	5.69728	257	6284	4.61184	probable rRNA maturation factor YbeY, putative
Tb927.3.3800.2:mRNA-p1;Tb927.3.3800.1:mRNA-p1	Tb927.3.3800.2:mRNA-p1;Tb927.3.3800.1:mRNA-p1	hypothetical protein, conserved	6;5	7.1	110.12	1024	1024;915	0.0891036	5.68102	258	4178	4.01737	hypothetical protein, conserved
Tb927.10.11870:mRNA-p1	Tb927.10.11870:mRNA-p1	mitochondrial RNA binding protein	6	20.3	34.683	310	310	0.0876185	5.65296	259	3418	3.72213	mitochondrial RNA binding protein
Tb927.9.4290:mRNA-p1	Tb927.9.4290:mRNA-p1	hypothetical protein, conserved	5	26.8	27.771	250	250	0.0873688	5.63557	260	3950	3.92527	hypothetical protein, conserved
Tb927.7.190:mRNA-p1	Tb927.7.190:mRNA-p1	thimet oligopeptidase, putative	14	19.3	77.472	685	685	0.0873688	5.63178	261	1206	2.20811	thimet oligopeptidase, putative
Tb927.10.5400:mRNA-p1	Tb927.10.5400:mRNA-p1	hypothetical protein, conserved	8	20.4	63.396	574	574	0.081304	5.54711	262	1817	2.79392	hypothetical protein, conserved
Tb927.11.530:mRNA-p1	Tb927.11.530:mRNA-p1	RNA-binding protein, putative	7	38	22.331	200	200	0.0803467	5.52455	263	2781	3.40247	RNA-binding protein, putative
Tb927.8.7170:mRNA-p1	Tb927.8.7170:mRNA-p1	inositol polyphosphate 1-phosphatase, putative	6	19.2	42.081	390	390	0.0803467	5.52446	264	1560	2.56294	inositol polyphosphate 1-phosphatase, putative
Tb927.3.4140:mRNA-p1	Tb927.3.4140:mRNA-p1	hypothetical protein, conserved	7	16.2	61.891	561	561	0.0803467	5.51333	265	2712	3.35529	hypothetical protein, conserved
Tb927.4.4050:mRNA-p1	Tb927.4.4050:mRNA-p1	glycosomal transporter (GAT1)	4	6.7	76.05	683	683	0.0803467	5.49369	266	4347	4.03052	glycosomal transporter (GAT1)
Tb927.3.2430:mRNA-p1	Tb927.3.2430:mRNA-p1	Alsin, putative	6	9.3	103.07	920	920	0.0803467	5.47193	267	4788	4.16451	Alsin, putative
Tb927.9.10230:mRNA-p1	Tb927.9.10230:mRNA-p1	Co-chaperone protein P23	3	20.2	18.769	168	168	0.0797305	5.45309	268	471	0.813494	Co-chaperone protein P23
Tb927.8.8050:mRNA-p1	Tb927.8.8050:mRNA-p1	Nucleoporin NUP75	3	7.3	74.823	739	739	0.0797305	5.44072	269	4092	3.92713	Nucleoporin NUP75
Tb927.3.3460:mRNA-p1	Tb927.3.3460:mRNA-p1	succinate dehydrogenase flavoprotein subunit, putative	7	16.6	53.228	483	483	0.0797305	5.42647	270	2388	3.14477	succinate dehydrogenase flavoprotein subunit, putative
Tb927.10.13980:mRNA-p1	Tb927.10.13980:mRNA-p1	btb/poz domain containing protein, putative	3	15.9	23.794	208	208	0.0797305	5.42418	271	3374	3.6381	btb/poz domain containing protein, putative
Tb927.2.1140:pseudogenic_transcript-p1	Tb927.2.1140:pseudogenic_transcript-p1	retrotransposon hot spot protein 3 (RHS3), interrupted	2	7.1	37.92	340	340	0.0797305	5.41727	272	3198	3.55549	retrotransposon hot spot protein 3 (RHS3), interrupted
Tb927.7.1360:mRNA-p1	Tb927.7.1360:mRNA-p1	hypothetical protein, conserved	15	39.9	41.946	366	366	0.0797305	5.41176	273	4109	3.91181	hypothetical protein, conserved
Tb927.9.2580:mRNA-p1	Tb927.9.2580:mRNA-p1	deoxyhypusine hydroxylase, putative	9	34.7	35.134	317	317	0.0797305	5.38536	274	2683	3.2916	deoxyhypusine hydroxylase, putative
Tb927.8.6630:mRNA-p1	Tb927.8.6630:mRNA-p1	hypothetical protein	2	11.8	22.696	212	212	0.0797305	5.379	275	7149	4.70024	hypothetical protein
Tb927.11.14410:mRNA-p1	Tb927.11.14410:mRNA-p1	Ankyrin repeats (3 copies), putative	3	9.9	59.582	527	527	0.0797305	5.35885	276	4699	4.08961	Ankyrin repeats (3 copies), putative
Tb927.6.2690:mRNA-p1	Tb927.6.2690:mRNA-p1	ubiquitin carboxyl-terminal hydrolase, putative	11	18	70.409	639	639	0.0797305	5.35067	277	1496	2.43315	ubiquitin carboxyl-terminal hydrolase, putative
Tb927.4.470:mRNA-p1	Tb927.4.470:mRNA-p1	snoRNP protein GAR1, putative	4	31.9	21.783	229	229	0.0747189	5.27311	278	1296	2.22091	snoRNP protein GAR1, putative
Tb927.11.12110:mRNA-p1	Tb927.11.12110:mRNA-p1	RNA helicase, putative	22	20.6	143.09	1299	1299	0.0747189	5.26946	279	2664	3.25526	RNA helicase, putative
Tb927.10.8960:mRNA-p1	Tb927.10.8960:mRNA-p1	hypothetical protein, conserved	5	23.2	26.87	237	237	0.0736936	5.23428	280	3799	3.76212	hypothetical protein, conserved
Tb927.9.11260:mRNA-p1	Tb927.9.11260:mRNA-p1	nucleoside diphosphate kinase, putative	2	11.7	37.106	334	334	0.0736473	5.21852	281	2171	2.94972	nucleoside diphosphate kinase, putative
Tb927.10.6900:mRNA-p1;Tb10.v4.0246:mRNA-p1	Tb927.10.6900:mRNA-p1;Tb10.v4.0246:mRNA-p1	base J-associated glucosyltransferase	4;4	10.7	71.799	655	655;655	0.0736473	5.21564	282	3529	3.64549	base J-associated glucosyltransferase
Tb927.9.5210:mRNA-p1	Tb927.9.5210:mRNA-p1	glutaminyl-tRNA synthetase, putative	16	28.1	67.278	577	577	0.0736473	5.21103	283	751	1.40801	glutaminyl-tRNA synthetase, putative
Tb927.11.8120:mRNA-p1	Tb927.11.8120:mRNA-p1	protein transport protein SEC13, putative	5	27.5	35.125	327	327	0.0736473	5.2067	284	1942	2.77358	protein transport protein SEC13, putative
Tb927.8.4930:mRNA-p1	Tb927.8.4930:mRNA-p1	hypothetical protein, conserved	4	23.3	33.895	305	305	0.0736473	5.20038	285	4227	3.8906	hypothetical protein, conserved
Tb927.7.1330:mRNA-p1	Tb927.7.1330:mRNA-p1	hypothetical protein, conserved	8	24.8	39.755	355	355	0.0736473	5.18857	286	2003	2.80808	hypothetical protein, conserved
Tb927.10.7310:mRNA-p1	Tb927.10.7310:mRNA-p1	terminal uridylyltransferase 3, putative	9	18.1	91.991	827	827	0.0736473	5.18569	287	4183	3.86542	terminal uridylyltransferase 3, putative
Tb927.11.10210:mRNA-p1	Tb927.11.10210:mRNA-p1	hypothetical protein, conserved	4	4.5	107.26	960	960	0.0718244	5.11429	288	4531	3.97569	hypothetical protein, conserved
Tb927.4.1140:mRNA-p1	Tb927.4.1140:mRNA-p1	phosphatidylinositol 4-kinase, putative	2	5.9	65.934	581	581	0.068995	5.07924	289	4659	4.01088	phosphatidylinositol 4-kinase, putative
Tb927.3.1030:mRNA-p1	Tb927.3.1030:mRNA-p1	RNA-binding protein	18	57.4	39.272	357	357	0.068593	5.0625	290	993	1.77574	RNA-binding protein
Tb927.4.1270:mRNA-p1	Tb927.4.1270:mRNA-p1	ruvB-like DNA helicase, putative	38	77.3	49.905	459	459	0.0644424	5.01809	291	546	0.907882	ruvB-like DNA helicase, putative
Tb927.11.9980:mRNA-p1	Tb927.11.9980:mRNA-p1	2-oxoglutarate dehydrogenase E1 component, putative	42	51	112.95	1005	1005	0.0632601	4.9991	292	539	0.884317	2-oxoglutarate dehydrogenase E1 component, putative
Tb927.5.1340:mRNA-p1;Tb11.v5.0884.1-p1	Tb927.5.1340:mRNA-p1	pre-mRNA splicing factor, putative	6;2	8.3	92.191	820	820;581	0.0632601	4.99429	293	449	0.615815	pre-mRNA splicing factor, putative
Tb927.9.8290:mRNA-p1	Tb927.9.8290:mRNA-p1	mitochondrial ribosomal protein l30	4	28.4	25.114	218	218	0.0632601	4.9891	294	5001	4.08833	mitochondrial ribosomal protein l30
Tb11.v5.0412.1-p1	Tb11.v5.0412.1-p1	hypothetical protein, conserved	2	2.5	89.646	803	803	0.0632601	4.98777	295	4476	3.92342	hypothetical protein, conserved
Tb927.10.6160:mRNA-p1	Tb927.10.6160:mRNA-p1	Sec34-like family, putative	9	17.2	81.54	731	731	0.0632601	4.9559	296	2982	3.33261	Sec34-like family, putative
Tb927.11.16210:mRNA-p1	Tb927.11.16210:mRNA-p1	cAMP response protein 1, putative	2	5.2	81.39	705	705	0.0632601	4.94505	297	5905	4.3134	cAMP response protein 1, putative
Tb927.9.6450:mRNA-p1	Tb927.9.6450:mRNA-p1	peroxisomal membrane protein (Pex16), putative	2	8.4	50.126	453	453	0.0632601	4.93696	298	1916	2.68471	peroxisomal membrane protein (Pex16), putative
Tb927.5.2790:mRNA-p1	Tb927.5.2790:mRNA-p1	mitochondrial DNA polymerase beta-PAK	21	30.1	87.228	813	813	0.0632601	4.93479	299	2896	3.27584	mitochondrial DNA polymerase beta-PAK
Tb927.10.8210:mRNA-p1	Tb927.10.8210:mRNA-p1	KREPA2	2	11.2	62.912	587	587	0.0632601	4.92705	300	3296	3.45768	KREPA2
Tb927.11.850:mRNA-p1	Tb927.11.850:mRNA-p1	Atypical serine/threonine protein kinase BUD32, putative	7	43.5	27.013	246	246	0.0632601	4.90965	301	3398	3.49685	Atypical serine/threonine protein kinase BUD32, putative
Tb927.8.6660:mRNA-p1	Tb927.8.6660:mRNA-p1	paraflagellar rod component, putative	6	13.5	69.055	607	607	0.0632601	4.89302	302	223	-0.437505	paraflagellar rod component, putative
Tb927.11.3120:mRNA-p1	Tb927.11.3120:mRNA-p1	nucleolar GTP-binding protein 1	19	33.4	74.753	655	655	0.0632601	4.88286	303	2595	3.09834	nucleolar GTP-binding protein 1
Tb927.11.4660:mRNA-p1	Tb927.11.4660:mRNA-p1	Kinesin-13 2	6	8.6	76.989	690	690	0.0632601	4.86623	304	1937	2.67168	Kinesin-13 2
Tb927.7.5230:mRNA-p1	Tb927.7.5230:mRNA-p1	lanosterol synthase	8	10.6	103.03	906	906	0.0632601	4.86346	305	1996	2.71023	lanosterol synthase
Tb927.10.11990:mRNA-p1	Tb927.10.11990:mRNA-p1	60S ribosome subunit biogenesis protein NIP7, putative	5	22.3	23.952	215	215	0.0632601	4.86079	306	5039	4.04153	60S ribosome subunit biogenesis protein NIP7, putative
Tb927.8.7720:mRNA-p1	Tb927.8.7720:mRNA-p1	hypothetical protein, conserved	7	32.4	24.902	225	225	0.0632601	4.85572	307	1715	2.4819	hypothetical protein, conserved
Tb927.8.4670:mRNA-p1	Tb927.8.4670:mRNA-p1	hypothetical protein, conserved	3	8.1	66.898	581	581	0.0632601	4.84243	308	7149	4.53674	hypothetical protein, conserved
Tb927.6.5110:mRNA-p1	Tb927.6.5110:mRNA-p1	damage-specific DNA binding protein, putative	18	17.7	138.21	1270	1270	0.0632601	4.83721	309	2542	3.04029	damage-specific DNA binding protein, putative
Tb927.11.8770:mRNA-p1	Tb927.11.8770:mRNA-p1	ATP-dependent RNA helicase FAL1, putative	6	17.2	45.516	401	401	0.0632601	4.82586	310	1479	2.25428	ATP-dependent RNA helicase FAL1, putative
Tb927.11.2110:mRNA-p1	Tb927.11.2110:mRNA-p1	Snf7, putative	7	34.6	24.813	214	214	0.0632601	4.81909	311	2734	3.13603	Snf7, putative
Tb927.7.3490:mRNA-p1	Tb927.7.3490:mRNA-p1	synaptojanin, putative	41	57.6	91.731	820	820	0.0632601	4.80363	312	2761	3.14557	synaptojanin, putative
Tb927.10.6630:mRNA-p1	Tb927.10.6630:mRNA-p1	ATP-dependent RNA helicase DBP2A, putative	26	48.6	64.082	568	568	0.0632601	4.80267	313	1724	2.46153	ATP-dependent RNA helicase DBP2A, putative
Tb927.10.3380:mRNA-p1;Tb927.10.3370:mRNA-p1	Tb927.10.3380:mRNA-p1;Tb927.10.3370:mRNA-p1	60S acidic ribosomal protein P2, putative	6;6	64	11.535	114	114;114	0.0632601	4.77045	314	422	0.426478	60S acidic ribosomal protein P2, putative
Tb927.3.640:mRNA-p1	Tb927.3.640:mRNA-p1	hypothetical protein, conserved	2	10.8	32.723	296	296	0.0632601	4.76736	315	2385	2.92057	hypothetical protein, conserved
Tb927.10.6970:mRNA-p1;Tb927.10.6940:mRNA-p1	Tb927.10.6970:mRNA-p1;Tb927.10.6940:mRNA-p1	serine peptidase, Clan SC, Family S9B	19;19	27.8	93.683	850	850;850	0.0632601	4.76221	316	1170	1.88851	serine peptidase, Clan SC, Family S9B
Tb927.11.16100:mRNA-p1	Tb927.11.16100:mRNA-p1	ubiquitin carboxyl-terminal hydrolase, putative	9	9	131.25	1184	1184	0.0632601	4.75027	317	2442	2.94551	ubiquitin carboxyl-terminal hydrolase, putative
Tb927.7.4450:mRNA-p1	Tb927.7.4450:mRNA-p1	SUMO-interacting motif-containing protein	26	27.7	113.23	996	996	0.0632601	4.74613	318	2779	3.12747	SUMO-interacting motif-containing protein
Tb927.3.5520:mRNA-p1;REV__Tb927.11.5400:mRNA-p1	Tb927.3.5520:mRNA-p1	26S proteasome regulatory non-ATPase subunit	47;1	54.2	99.897	911	911;487	0.0632601	4.73389	319	724	1.18243	26S proteasome regulatory non-ATPase subunit
Tb927.10.7570:mRNA-p1;Tb11.v5.0774.1-p1	Tb927.10.7570:mRNA-p1;Tb11.v5.0774.1-p1	dihydrolipoamide acetyltransferase E2 subunit, putative	10;5	31.7	48.107	451	451;197	0.0632601	4.7035	320	691	1.11061	dihydrolipoamide acetyltransferase E2 subunit, putative
Tb927.9.1700:mRNA-p1	Tb927.9.1700:mRNA-p1	btb/poz domain containing protein, putative	7	15	67.667	601	601	0.0632601	4.68193	321	2747	3.09721	btb/poz domain containing protein, putative
Tb927.10.1630:mRNA-p1	Tb927.10.1630:mRNA-p1	atp-binding cassette sub-family e member 1	9	14.9	71.078	631	631	0.0632601	4.67465	322	1222	1.92411	atp-binding cassette sub-family e member 1
Tb927.11.2040:mRNA-p1	Tb927.11.2040:mRNA-p1	STE/STE11 serine/threonine-protein kinase, putative	10	15	80.668	751	751	0.0632601	4.67072	323	3958	3.61517	STE/STE11 serine/threonine-protein kinase, putative
Tb927.11.4810:mRNA-p1	Tb927.11.4810:mRNA-p1	hypothetical protein, conserved	3	14.4	19.431	174	174	0.0594636	4.61651	324	3402	3.39232	hypothetical protein, conserved
Tb927.8.910:mRNA-p1	Tb927.8.910:mRNA-p1	hypothetical protein, conserved	4	16.6	50.195	465	465	0.0594636	4.61562	325	3683	3.50237	hypothetical protein, conserved
Tb927.6.1440:mRNA-p1	Tb927.6.1440:mRNA-p1	LSU ribosomal protein, mitochondrial, putative	10	41.5	29.996	258	258	0.0594636	4.60072	326	4856	3.89682	LSU ribosomal protein, mitochondrial, putative
Tb927.8.2770:mRNA-p1;Tb11.v5.0808.1-p1	Tb927.8.2770:mRNA-p1	inositol 1,4,5-trisphosphate receptor	14;1	5.4	342.48	3099	3099;660	0.0587719	4.57943	327	7149	4.45038	inositol 1,4,5-trisphosphate receptor
Tb927.5.2640:mRNA-p1	Tb927.5.2640:mRNA-p1	nicotinamide/nicotinic acid mononucleotide adenylyltransferase	2	10.1	31.244	277	277	0.0579919	4.56371	328	3373	3.36226	nicotinamide/nicotinic acid mononucleotide adenylyltransferase
Tb927.9.5590:mRNA-p1	Tb927.9.5590:mRNA-p1	DNA topoisomerase ii	31	30.7	137.56	1221	1221	0.0571688	4.5456	329	2259	2.77952	DNA topoisomerase ii
Tb927.9.13350:mRNA-p1	Tb927.9.13350:mRNA-p1	hypothetical protein, conserved	11	44.8	38.589	337	337	0.0566687	4.53292	330	4710	3.83519	hypothetical protein, conserved
Tb927.5.3020:mRNA-p1	Tb927.5.3020:mRNA-p1	hypothetical protein, conserved	5	18.3	45.935	420	420	0.0560852	4.51708	331	4517	3.77046	hypothetical protein, conserved
Tb927.4.3560:mRNA-p1;Tb927.4.3610:mRNA-p1	Tb927.4.3560:mRNA-p1;Tb927.4.3610:mRNA-p1	protein phoshatase 1, putative	3;2	11	36.828	326	326;209	0.0560852	4.50909	332	2844	3.09867	protein phoshatase 1, putative
Tb927.10.1320:mRNA-p1	Tb927.10.1320:mRNA-p1	hypothetical protein, conserved	13	22.9	77.89	715	715	0.0560852	4.50271	333	2708	3.02363	hypothetical protein, conserved
Tb927.5.4560:mRNA-p1;Tb11.v5.0409.1-p1;Tb05.5K5.200:mRNA-p1	Tb927.5.4560:mRNA-p1;Tb11.v5.0409.1-p1;Tb05.5K5.200:mRNA-p1	guanine deaminase, putative	18;18;18	45.5	55.321	516	516;516;516	0.0560852	4.49611	334	706	1.07982	guanine deaminase, putative
Tb927.10.11600:mRNA-p1;Tb11.v5.0856.1-p1	Tb927.10.11600:mRNA-p1	hypothetical protein, conserved	7;1	14	66.002	599	599;214	0.0560852	4.49316	335	4679	3.80397	hypothetical protein, conserved
Tb927.8.4140:mRNA-p1	Tb927.8.4140:mRNA-p1	Anaphase-promoting complex-associated protein AP3	9	23.5	45.78	404	404	0.0560852	4.48306	336	6546	4.28408	Anaphase-promoting complex-associated protein AP3
Tb927.8.5650:mRNA-p1	Tb927.8.5650:mRNA-p1	hypothetical protein, conserved	9	12.6	103.11	914	914	0.0560852	4.4745	337	3466	3.36245	hypothetical protein, conserved
Tb927.9.13050:mRNA-p1	Tb927.9.13050:mRNA-p1	hypothetical protein, conserved	3	3.1	135.48	1244	1244	0.0560852	4.45968	338	3410	3.33468	hypothetical protein, conserved
Tb927.7.2400:mRNA-p1	Tb927.7.2400:mRNA-p1	tyrosyl-tRNA synthetase, putative	3	8.2	45.797	425	425	0.0560852	4.454	339	1298	1.93693	tyrosyl-tRNA synthetase, putative
Tb927.11.6720:mRNA-p1	Tb927.11.6720:mRNA-p1	mRNA cap guanine-N7 methyltransferase, putative	11	14.4	117.56	1057	1057	0.0560852	4.4502	340	3807	3.48505	mRNA cap guanine-N7 methyltransferase, putative
Tb927.10.11660:mRNA-p1	Tb927.10.11660:mRNA-p1	hypothetical protein, conserved	8	26.5	50.098	453	453	0.0560852	4.44121	341	2965	3.12019	hypothetical protein, conserved
Tb927.8.1980:mRNA-p1	Tb927.8.1980:mRNA-p1	Beta propeller protein 1	2	5.7	53.365	477	477	0.0560852	4.44081	342	2217	2.69654	Beta propeller protein 1
Tb927.3.1910:mRNA-p1	Tb927.3.1910:mRNA-p1	Histone RNA hairpin-binding protein RNA-binding domain containing protein, putative	17	39.9	63.506	591	591	0.0560852	4.43982	343	4306	3.65007	Histone RNA hairpin-binding protein RNA-binding domain containing protein, putative
Tb927.11.940:mRNA-p1	Tb927.11.940:mRNA-p1	KREPB5	5	16.5	43.464	382	382	0.0560852	4.41188	344	4666	3.76171	KREPB5
Tb927.10.15250:mRNA-p1;Tb11.v5.0996.1-p1;Tb11.1220:mRNA-p1	Tb927.10.15250:mRNA-p1;Tb11.v5.0996.1-p1;Tb11.1220:mRNA-p1	paraflagellar rod component, putative	10;10;10	25.4	57.813	485	485;485;485	0.0560852	4.3934	345	627	0.861869	paraflagellar rod component, putative
Tb927.8.3630:mRNA-p1;Tb927.8.3650:mRNA-p1;Tb927.8.3620:mRNA-p1;Tb11.v5.0766.1-p1	Tb927.8.3630:mRNA-p1;Tb927.8.3650:mRNA-p1;Tb927.8.3620:mRNA-p1;Tb11.v5.0766.1-p1	folate transporter, putative	8;6;6;5	17.2	69.808	632	632;632;632;387	0.055774	4.37773	346	2600	2.90967	folate transporter, putative
Tb927.5.840:mRNA-p1	Tb927.5.840:mRNA-p1	Nucleolar protein 111	6	10.3	111.5	994	994	0.0551917	4.36332	347	3626	3.38537	Nucleolar protein 111
Tb927.4.710:mRNA-p1	Tb927.4.710:mRNA-p1	hypothetical protein, conserved	7	30.3	30.465	274	274	0.050693	4.32097	348	6222	4.16022	hypothetical protein, conserved
Tb927.11.1090:mRNA-p1;Tb927.11.1100:mRNA-p1;Tb11.v5.1038.1-p1;Tb11.v5.0702.1-p1	Tb927.11.1090:mRNA-p1;Tb927.11.1100:mRNA-p1;Tb11.v5.1038.1-p1	calpain-like protein, putative	2;2;0;0	0.4	658.93	5837	5837;1096;1576;730	0.050693	4.31312	349	163	-1.09836	calpain-like protein, putative
Tb927.4.2720:mRNA-p1;Tb11.v5.0842.1-p1	Tb927.4.2720:mRNA-p1;Tb11.v5.0842.1-p1	ATP dependent DEAD-box helicase	13;13	19.1	83.637	739	739;912	0.050693	4.31224	350	6527	4.22099	ATP dependent DEAD-box helicase
Tb927.8.5380:mRNA-p1	Tb927.8.5380:mRNA-p1	ubiquitin fold modifier protein, putative	3	46.4	10.47	97	97	0.050693	4.30448	351	1321	1.91209	ubiquitin fold modifier protein, putative
Tb927.11.3410:mRNA-p1	Tb927.11.3410:mRNA-p1	hypothetical protein, conserved	4	4.9	117.69	1056	1056	0.050693	4.29787	352	6818	4.2757	hypothetical protein, conserved
Tb927.10.9870:mRNA-p1	Tb927.10.9870:mRNA-p1	Component of motile flagella 12	16	60.8	29.794	265	265	0.0506246	4.27542	353	1716	2.28131	Component of motile flagella 12
Tb927.10.4470:mRNA-p1;Tb10.v4.0037:mRNA-p1	Tb927.10.4470:mRNA-p1;Tb10.v4.0037:mRNA-p1	hypothetical protein, conserved	3;3	3.7	115.54	1051	1051;1121	0.0506246	4.27303	354	4396	3.63437	hypothetical protein, conserved
Tb927.7.6890:mRNA-p1	Tb927.7.6890:mRNA-p1	methyltransferase domain containing protein, putative	7	37.8	28.794	254	254	0.0506246	4.26388	355	910	1.35805	methyltransferase domain containing protein, putative
Tb927.8.4580:mRNA-p1	Tb927.8.4580:mRNA-p1	Basal body protein	36	63.4	58.084	483	483	0.0506246	4.2636	356	752	1.07886	Basal body protein
Tb927.11.4880:mRNA-p1	Tb927.11.4880:mRNA-p1	Calmodulin-binding, putative	10	47.8	30.214	274	274	0.0506246	4.25421	357	1246	1.80331	Calmodulin-binding, putative
Tb927.10.8230:mRNA-p1;Tb11.v5.0668.1-p1	Tb927.10.8230:mRNA-p1;Tb11.v5.0668.1-p1	protein disulfide isomerase 2	23;23	38.2	55.579	497	497;497	0.0506246	4.23389	358	110	-1.70246	protein disulfide isomerase 2
Tb927.10.9890:mRNA-p1;Tb11.v5.0458.1-p1	Tb927.10.9890:mRNA-p1	hypothetical protein, conserved	24;4	37.5	97.192	871	871;209	0.0506246	4.22657	359	1502	2.06483	hypothetical protein, conserved
Tb927.9.12890:mRNA-p1	Tb927.9.12890:mRNA-p1	hypothetical protein, conserved	3	26.4	16.341	140	140	0.050527	4.20841	360	4193	3.54191	hypothetical protein, conserved
Tb927.5.3920:mRNA-p1	Tb927.5.3920:mRNA-p1	Peroxisome biogenesis factor 6	13	18.4	106.05	982	982	0.0494648	4.19014	361	2150	2.57427	Peroxisome biogenesis factor 6
Tb927.6.2140:mRNA-p1	Tb927.6.2140:mRNA-p1	hypothetical protein, conserved	9	44.9	28.771	267	267	0.0494648	4.1805	362	2235	2.62621	hypothetical protein, conserved
Tb927.10.14910:mRNA-p1	Tb927.10.14910:mRNA-p1	Sarcalumenin, putative	21	40	59.421	517	517	0.0494648	4.17981	363	2792	2.94326	Sarcalumenin, putative
Tb927.5.4260:mRNA-p1;Tb927.5.4250:mRNA-p1;Tb927.5.4240:mRNA-p1;Tb927.5.4230:mRNA-p1;Tb927.5.4220:mRNA-p1;Tb927.5.4210:mRNA-p1;Tb927.5.4200:mRNA-p1;Tb927.5.4190:mRNA-p1;Tb927.5.4180:mRNA-p1;Tb927.5.4170:mRNA-p1	Tb927.5.4260:mRNA-p1;Tb927.5.4250:mRNA-p1;Tb927.5.4240:mRNA-p1;Tb927.5.4230:mRNA-p1;Tb927.5.4220:mRNA-p1;Tb927.5.4210:mRNA-p1;Tb927.5.4200:mRNA-p1;Tb927.5.4190:mRNA-p1;Tb927.5.4180:mRNA-p1;Tb927.5.4170:mRNA-p1	histone H4, putative	7;7;7;7;7;7;7;7;7;7	41	11.142	100	100;100;100;100;100;100;100;100;100;100	0.0494648	4.16674	364	88	-2.04836	histone H4, putative
Tb927.1.4650:mRNA-p1	Tb927.1.4650:mRNA-p1	cyclin-like F-box protein 2	4	17.2	52.284	476	476	0.0494648	4.15464	365	4238	3.53742	cyclin-like F-box protein 2
Tb927.4.360:mRNA-p1	Tb927.4.360:mRNA-p1	1,2-Dihydroxy-3-keto-5-methylthiopentene dioxygenase, putative	4	17.1	33.47	280	280	0.0473819	4.13138	366	1143	1.64291	1,2-Dihydroxy-3-keto-5-methylthiopentene dioxygenase, putative
Tb927.8.5050:mRNA-p1	Tb927.8.5050:mRNA-p1	OTU-like cysteine protease, putative	18	34.7	80.96	746	746	0.0467043	4.11644	367	2073	2.49787	OTU-like cysteine protease, putative
Tb927.11.9400:mRNA-p1	Tb927.11.9400:mRNA-p1	hypothetical protein, conserved	8	12.9	95.905	887	887	0.0467043	4.10881	368	684	0.894291	hypothetical protein, conserved
Tb927.11.10430:mRNA-p1	Tb927.11.10430:mRNA-p1	hypothetical protein, conserved	14	29.6	63.675	568	568	0.0452752	4.08719	369	1609	2.12447	hypothetical protein, conserved
Tb927.11.10130:mRNA-p1	Tb927.11.10130:mRNA-p1	hypothetical protein, conserved	3	11.1	34.304	324	324	0.0452752	4.08682	370	4826	3.70523	hypothetical protein, conserved
Tb927.10.7670:mRNA-p1	Tb927.10.7670:mRNA-p1	Protein of unknown function (DUF2962), putative	3	14	27.443	242	242	0.0432027	4.0547	371	3833	3.36898	Protein of unknown function (DUF2962), putative
Tb927.5.800:mRNA-p1;Tb927.5.790:mRNA-p1	Tb927.5.800:mRNA-p1;Tb927.5.790:mRNA-p1	casein kinase I, isoform 2	16;9	45.5	38.374	332	332;330	0.0432027	4.05345	372	601	0.692062	casein kinase I, isoform 2
Tb927.11.9050:mRNA-p1	Tb927.11.9050:mRNA-p1	p21-C-terminal region-binding protein, putative	4	15.6	44.583	397	397	0.0432027	4.0528	373	2258	2.5978	p21-C-terminal region-binding protein, putative
Tb927.11.4030:mRNA-p1	Tb927.11.4030:mRNA-p1	hypothetical protein, conserved	41	29.1	183.2	1673	1673	0.0432027	4.03667	374	1927	2.36525	hypothetical protein, conserved
Tb927.7.6290:mRNA-p1	Tb927.7.6290:mRNA-p1	kinesin, putative	2	2.4	96.951	891	891	0.0432027	4.03549	375	1585	2.07952	kinesin, putative
Tb927.11.10330:mRNA-p1	Tb927.11.10330:mRNA-p1	regulator of chromosome condensation 1-like protein	7	13.5	70.392	646	646	0.0432027	4.03473	376	1968	2.38793	regulator of chromosome condensation 1-like protein
Tb927.7.4440:mRNA-p1	Tb927.7.4440:mRNA-p1	NAD dependent epimerase/dehydratase family, putative	4	24.7	31.573	292	292	0.0432027	4.02975	377	2930	2.95826	NAD dependent epimerase/dehydratase family, putative
Tb927.11.7150:mRNA-p1	Tb927.11.7150:mRNA-p1	NGG1 interacting factor 3-like	9	45.2	30.459	281	281	0.0432027	4.02017	378	1649	2.12513	NGG1 interacting factor 3-like
Tb927.10.12100:mRNA-p1	Tb927.10.12100:mRNA-p1	RNA-binding protein 7B	2	12.1	13.219	116	116	0.0432027	4.01317	379	4314	3.50876	RNA-binding protein 7B
Tb927.5.1000:mRNA-p1	Tb927.5.1000:mRNA-p1	ubiquitin-conjugating enzyme E2, putative	7	54.1	16.766	148	148	0.0432027	4.01154	380	542	0.512293	ubiquitin-conjugating enzyme E2, putative
Tb927.8.6060:mRNA-p1	Tb927.8.6060:mRNA-p1	2-amino-3-ketobutyrate coenzyme A ligase	22	69.3	43.734	404	404	0.0432027	4.00869	381	370	-0.0422657	2-amino-3-ketobutyrate coenzyme A ligase
Tb927.10.3080:mRNA-p1	Tb927.10.3080:mRNA-p1	methionine biosynthetic protein, putative	3	7.1	44.444	394	394	0.0432027	3.99615	382	3532	3.20884	methionine biosynthetic protein, putative
Tb927.11.11610:mRNA-p1	Tb927.11.11610:mRNA-p1	Cactus-binding C-terminus of cactin protein, putative	10	24.5	64.588	572	572	0.0432027	3.99436	383	3775	3.30106	Cactus-binding C-terminus of cactin protein, putative
Tb927.7.2650:mRNA-p1;Tb927.7.2640:mRNA-p1	Tb927.7.2650:mRNA-p1	hypothetical protein, conserved	9;4	20.3	62.171	537	537;453	0.0432027	3.99368	384	198	-0.955606	hypothetical protein, conserved
Tb927.10.4440:mRNA-p1;Tb10.v4.0034:mRNA-p1	Tb927.10.4440:mRNA-p1;Tb10.v4.0034:mRNA-p1	predicted SAP domain protein	7;7	37.6	30.902	287	287;287	0.0432027	3.99167	385	4566	3.568	predicted SAP domain protein
Tb927.8.2580:mRNA-p1	Tb927.8.2580:mRNA-p1	exocyst complex component Sec10, putative	23	24.7	123.04	1098	1098	0.0432027	3.99047	386	4708	3.60844	exocyst complex component Sec10, putative
Tb927.3.4550:mRNA-p1	Tb927.3.4550:mRNA-p1	kinetoplast ribosomal PPR-repeat containing protein 6	10	22.8	74.839	675	675	0.0432027	3.9858	387	5485	3.82509	kinetoplast ribosomal PPR-repeat containing protein 6
Tb927.9.6560:mRNA-p1	Tb927.9.6560:mRNA-p1	NAK family pseudokinase, putative	27	35.8	80.198	726	726	0.0432027	3.98269	388	562	0.534513	NAK family pseudokinase, putative
Tb927.4.1530:mRNA-p1	Tb927.4.1530:mRNA-p1	hypothetical protein, conserved	6	7.4	109	970	970	0.0432027	3.98036	389	6436	4.04832	hypothetical protein, conserved
Tb927.4.2500:mRNA-p1	Tb927.4.2500:mRNA-p1	eukaryotic translation initiation factor 2-alpha kinase 2	7	10.1	111.92	1008	1008	0.0432027	3.97508	390	2900	2.89451	eukaryotic translation initiation factor 2-alpha kinase 2
Tb927.10.390:mRNA-p1	Tb927.10.390:mRNA-p1	DUF2407 ubiquitin-like domain containing protein, putative	4	47	16.343	149	149	0.0432027	3.96457	391	738	0.916452	DUF2407 ubiquitin-like domain containing protein, putative
Tb927.10.10340:mRNA-p1;Tb11.v5.0811.1-p1	Tb927.10.10340:mRNA-p1;Tb11.v5.0811.1-p1	structural maintenance of chromosome 2, putative	35;26	29.8	134	1175	1175;816	0.0432027	3.95531	392	1640	2.06477	structural maintenance of chromosome 2, putative
Tb927.10.1700:mRNA-p1	Tb927.10.1700:mRNA-p1	hypothetical protein, conserved	10	24	54.832	495	495	0.0432027	3.94797	393	7149	4.18514	hypothetical protein, conserved
Tb927.1.5000:mRNA-p1	Tb927.1.5000:mRNA-p1	hypothetical protein, conserved	4	22.1	30.458	271	271	0.0432027	3.93059	394	1741	2.14365	hypothetical protein, conserved
Tb927.8.1210:mRNA-p1	Tb927.8.1210:mRNA-p1	hypothetical protein, conserved	13	55.2	77.786	686	686	0.0432027	3.92321	395	1306	1.72523	hypothetical protein, conserved
Tb927.11.340:mRNA-p1	Tb927.11.340:mRNA-p1	hypothetical protein, conserved	3	5	79.394	713	713	0.0432027	3.92195	396	6991	4.14193	hypothetical protein, conserved
Tb927.9.12310:mRNA-p1	Tb927.9.12310:mRNA-p1	hypothetical protein, conserved	7	10.2	100.76	865	865	0.0432027	3.91875	397	6534	4.04076	hypothetical protein, conserved
Tb927.11.11720:mRNA-p1	Tb927.11.11720:mRNA-p1	FG-GAP repeat protein, putative	4	12.1	68.206	622	622	0.0432027	3.91831	398	2644	2.73188	FG-GAP repeat protein, putative
Tb927.7.1060:mRNA-p1	Tb927.7.1060:mRNA-p1	ISWI complex protein	9	23.3	53.733	494	494	0.0432027	3.91771	399	1626	2.02687	ISWI complex protein
Tb927.11.11220:mRNA-p1	Tb927.11.11220:mRNA-p1	dynein heavy chain, putative	31	8.2	480.25	4242	4242	0.0432027	3.90913	400	565	0.498251	dynein heavy chain, putative
Tb927.11.3260:mRNA-p1	Tb927.11.3260:mRNA-p1	mitochondrial DNA polymerase I protein D, putative	8	5.4	182.88	1629	1629	0.0432027	3.90747	401	3740	3.22136	mitochondrial DNA polymerase I protein D, putative
Tb927.2.5870:mRNA-p1	Tb927.2.5870:mRNA-p1	hypothetical protein, conserved	18	21	170.48	1588	1588	0.0432027	3.90595	402	3769	3.22891	hypothetical protein, conserved
Tb927.11.880:mRNA-p1	Tb927.11.880:mRNA-p1	cyclophilin a	9	67.2	18.717	177	177	0.0432027	3.89889	403	127	-1.66595	cyclophilin a
Tb927.7.1920:mRNA-p1	Tb927.7.1920:mRNA-p1	paraflagellar rod component, putative	10	25.2	59.271	543	543	0.0432027	3.89655	404	863	1.09501	paraflagellar rod component, putative
Tb927.3.4680:mRNA-p1	Tb927.3.4680:mRNA-p1	RAB GDP dissociation inhibitor alpha, putative	7	27	49.396	445	445	0.0432027	3.89359	405	595	0.554968	RAB GDP dissociation inhibitor alpha, putative
Tb927.9.4370:mRNA-p1	Tb927.9.4370:mRNA-p1	GTPase activating protein, putative	16	14	155.19	1397	1397	0.0432027	3.87932	406	2592	2.67451	GTPase activating protein, putative
Tb927.6.3160:mRNA-p1	Tb927.6.3160:mRNA-p1	splicing factor 3a, putative	11	33.6	61.529	542	542	0.0432027	3.86979	407	2821	2.79311	splicing factor 3a, putative
Tb927.11.5600:mRNA-p1	Tb927.11.5600:mRNA-p1	Archaic Translocase of outer membrane 14 kDa subunit	2	26.1	13.577	119	119	0.0432027	3.86928	408	2278	2.48113	Archaic Translocase of outer membrane 14 kDa subunit
Tb927.10.11180:mRNA-p1	Tb927.10.11180:mRNA-p1	Ubiquitin-like modifier-activating enzyme ATG7, putative	17	28.2	83.425	754	754	0.0432027	3.85456	409	3378	3.046	Ubiquitin-like modifier-activating enzyme ATG7, putative
Tb927.9.9810:mRNA-p1	Tb927.9.9810:mRNA-p1	hypothetical protein, conserved	2	12.5	16.882	152	152	0.0432027	3.85454	410	1710	2.0603	hypothetical protein, conserved
Tb927.10.4460:mRNA-p1;Tb10.v4.0036:mRNA-p1	Tb927.10.4460:mRNA-p1;Tb10.v4.0036:mRNA-p1	leucine carboxyl methyltransferase, putative	4;4	16	34.221	300	300;300	0.0432027	3.84346	411	2778	2.75684	leucine carboxyl methyltransferase, putative
Tb927.1.240:pseudogenic_transcript-p1	Tb927.1.240:pseudogenic_transcript-p1	retrotransposon hot spot protein (RHS, pseudogene), putative	2	0.5	283.49	2572	2572	0.0432027	3.84019	412	2522	2.61385	retrotransposon hot spot protein (RHS, pseudogene), putative
Tb927.9.10880:mRNA-p1	Tb927.9.10880:mRNA-p1	hypothetical protein, conserved	2	13.8	26.878	240	240	0.0432027	3.83121	413	5379	3.70312	hypothetical protein, conserved
Tb927.9.5350:mRNA-p1	Tb927.9.5350:mRNA-p1	actin related protein 3, putative	12	44.7	47.363	416	416	0.0432027	3.81367	414	4934	3.57506	actin related protein 3, putative
Tb927.10.5870:mRNA-p1	Tb927.10.5870:mRNA-p1	Flagellum attachment zone protein 25	9	25.4	49.467	456	456	0.0432027	3.8038	415	2214	2.41547	Flagellum attachment zone protein 25
Tb927.11.3240:mRNA-p1	Tb927.11.3240:mRNA-p1	T-complex protein 1, zeta subunit, putative	32	64.7	59.579	544	544	0.0432027	3.79687	416	282	-0.560888	T-complex protein 1, zeta subunit, putative
Tb927.8.6230:mRNA-p1	Tb927.8.6230:mRNA-p1	hypothetical protein, conserved	5	14.3	37.268	329	329	0.0432027	3.77738	417	2125	2.34934	hypothetical protein, conserved
Tb927.5.4080:mRNA-p1	Tb927.5.4080:mRNA-p1	hypothetical protein, conserved	3	7.9	58.167	533	533	0.0432027	3.77425	418	5103	3.60977	hypothetical protein, conserved
Tb11.v5.0697.1-p1;Tb927.3.2090:mRNA-p1	Tb11.v5.0697.1-p1;Tb927.3.2090:mRNA-p1	Xaa-Pro aminopeptidase, putative	2;2	6.4	68.035	610	610;615	0.0432027	3.77288	419	1615	1.94651	Xaa-Pro aminopeptidase, putative
Tb927.3.5580:mRNA-p1	Tb927.3.5580:mRNA-p1	tryptophanyl-tRNA synthetase	10	26.5	44.246	389	389	0.0432027	3.74919	420	1876	2.1592	tryptophanyl-tRNA synthetase
Tb927.1.1960:mRNA-p1	Tb927.1.1960:mRNA-p1	chaperone protein DnaJ, putative	7	11.9	75.71	658	658	0.0432027	3.74355	421	2999	2.83259	chaperone protein DnaJ, putative
Tb927.9.8200:mRNA-p1;Tb11.v5.0687.1-p1	Tb927.9.8200:mRNA-p1;Tb11.v5.0687.1-p1	Pescadillo N-terminus/BRCA1 C Terminus (BRCT) domain containing protein, putative	18;17	30.5	76.419	658	658;576	0.0432027	3.73349	422	1952	2.20964	Pescadillo N-terminus/BRCA1 C Terminus (BRCT) domain containing protein, putative
Tb927.7.3010:mRNA-p1	Tb927.7.3010:mRNA-p1	Nitrogen permease regulator 2, putative	3	5.6	82.719	746	746	0.0432027	3.71977	423	6569	3.95694	Nitrogen permease regulator 2, putative
Tb927.3.2710:mRNA-p1	Tb927.3.2710:mRNA-p1	6-phosphofructo-2-kinase 2	4	5.4	110.79	1023	1023	0.0432027	3.70266	424	6957	4.03633	6-phosphofructo-2-kinase 2
Tb927.11.11340:mRNA-p1;Tb11.v5.1036.1-p1	Tb927.11.11340:mRNA-p1	gamma-tubulin complex component 3	4;1	5.9	87.877	782	782;349	0.0432027	3.69689	425	3310	2.9613	gamma-tubulin complex component 3
Tb927.9.14070:mRNA-p1	Tb927.9.14070:mRNA-p1	short-chain dehydrogenase, putative	4	9.7	51.103	463	463	0.0432027	3.68291	426	3267	2.93904	short-chain dehydrogenase, putative
Tb927.11.11430:mRNA-p1	Tb927.11.11430:mRNA-p1	cullin 1, putative	12	18	91.936	805	805	0.0432027	3.67675	427	2415	2.49972	cullin 1, putative
Tb927.9.15060:mRNA-p1	Tb927.9.15060:mRNA-p1	rRNA processing protein, putative	6	32.7	28.483	251	251	0.0432027	3.67611	428	2520	2.55774	rRNA processing protein, putative
Tb927.8.6530:mRNA-p1	Tb927.8.6530:mRNA-p1	SET domain containing protein, putative	2	8.6	41.897	372	372	0.0432027	3.66978	429	6463	3.91315	SET domain containing protein, putative
Tb927.11.2750:mRNA-p1	Tb927.11.2750:mRNA-p1	Present in the outer mitochondrial membrane proteome 12	7	40.6	52.991	473	473	0.0432027	3.65724	430	1391	1.69371	Present in the outer mitochondrial membrane proteome 12
Tb927.9.9450:mRNA-p1	Tb927.9.9450:mRNA-p1	zinc finger protein family member, putative	23	31.5	114.75	1030	1030	0.0432027	3.6555	431	1344	1.64077	zinc finger protein family member, putative
Tb927.1.2990:mRNA-p1	Tb927.1.2990:mRNA-p1	kinetoplast ribosomal PPR-repeat containing protein 2	42	47.4	115.95	1024	1024	0.0432027	3.65265	432	5330	3.62503	kinetoplast ribosomal PPR-repeat containing protein 2
Tb927.6.3600:mRNA-p1	Tb927.6.3600:mRNA-p1	LSU ribosomal protein, mitochondrial, putative	5	13.9	49.213	439	439	0.0432027	3.63672	433	6250	3.85142	LSU ribosomal protein, mitochondrial, putative
Tb927.7.7460:mRNA-p1	Tb927.7.7460:mRNA-p1	hypothetical protein, conserved	16	82.8	22.358	192	192	0.0432027	3.63545	434	575	0.405867	hypothetical protein, conserved
Tb927.10.12430:mRNA-p1	Tb927.10.12430:mRNA-p1	Noc2p family, putative	5	8.3	73.017	649	649	0.0432027	3.63531	435	2737	2.65351	Noc2p family, putative
Tb927.11.9080:mRNA-p1	Tb927.11.9080:mRNA-p1	Nucleolar protein 136	12	13.1	136.27	1216	1216	0.0432027	3.63177	436	3384	2.95633	Nucleolar protein 136
Tb927.5.2620:mRNA-p1	Tb927.5.2620:mRNA-p1	hypothetical protein, conserved	12	40	48.704	452	452	0.0432027	3.62515	437	1644	1.91151	hypothetical protein, conserved
Tb927.2.6100:mRNA-p1	Tb927.2.6100:mRNA-p1	hypothetical protein, conserved	8	24.2	53.279	487	487	0.0432027	3.60166	438	2963	2.75806	hypothetical protein, conserved
Tb927.11.7560:mRNA-p1	Tb927.11.7560:mRNA-p1	Component of motile flagella 15	29	61	67.695	629	629	0.0432027	3.59762	439	433	-0.0198539	Component of motile flagella 15
Tb927.6.4610:mRNA-p1	Tb927.6.4610:mRNA-p1	Ankyrin repeats (3 copies), putative	6	16.2	46.439	413	413	0.0432027	3.59588	440	1200	1.44746	Ankyrin repeats (3 copies), putative
Tb927.8.3560:mRNA-p1	Tb927.8.3560:mRNA-p1	DNA repair and recombination helicase protein PIF5	23	37.5	102.46	928	928	0.0432027	3.58711	441	728	0.72316	DNA repair and recombination helicase protein PIF5
Tb927.10.10330:mRNA-p1	Tb927.10.10330:mRNA-p1	Anaphase-promoting complex subunit CDC27	11	32.9	62.877	557	557	0.0432027	3.57299	442	3752	3.08554	Anaphase-promoting complex subunit CDC27
Tb927.1.4760:mRNA-p1	Tb927.1.4760:mRNA-p1	Vacuolar sorting protein 39 domain 1/Vacuolar sorting protein 39 domain 2, putative	30	33	114.71	1028	1028	0.0432027	3.57111	443	2838	2.6795	Vacuolar sorting protein 39 domain 1/Vacuolar sorting protein 39 domain 2, putative
Tb927.9.7110:mRNA-p1	Tb927.9.7110:mRNA-p1	GRAM domain containing protein, putative	23	74.6	32.572	295	295	0.0432027	3.55538	444	461	0.0542071	GRAM domain containing protein, putative
Tb927.7.3130:mRNA-p1	Tb927.7.3130:mRNA-p1	Transition Zone Protein 103 kDa	13	16	102.83	956	956	0.0432027	3.54174	445	4712	3.40446	Transition Zone Protein 103 kDa
Tb927.3.1820:mRNA-p1	Tb927.3.1820:mRNA-p1	mitochondrial RNA binding complex 1 subunit	4	20.4	30.237	289	289	0.0401576	3.49904	446	2025	2.18281	mitochondrial RNA binding complex 1 subunit
Tb927.11.1840:mRNA-p1;Tb11.1380.1-p1	Tb927.11.1840:mRNA-p1;Tb11.1380.1-p1	hypothetical protein, conserved	12;12	36.3	45.633	399	399;399	0.0401576	3.49789	447	248	-0.849935	hypothetical protein, conserved
Tb927.4.2140:mRNA-p1	Tb927.4.2140:mRNA-p1	Component of motile flagella 8	10	10.2	114.76	1000	1000	0.0398861	3.48522	448	2168	2.27479	Component of motile flagella 8
Tb927.1.600:mRNA-p1;Tb927.1.580:mRNA-p1	Tb927.1.600:mRNA-p1;Tb927.1.580:mRNA-p1	phosphate-repressible phosphate permease, putative	2;1	6.2	54.7	515	515;516	0.0391108	3.47403	449	7126	3.98831	phosphate-repressible phosphate permease, putative
Tb927.2.560:mRNA-p1	Tb927.2.560:mRNA-p1	retrotransposon hot spot protein 4 (RHS4), putative	6	5.8	95.911	845	845	0.0391108	3.46893	450	994	1.14332	retrotransposon hot spot protein 4 (RHS4), putative
Tb927.4.2340:mRNA-p1	Tb927.4.2340:mRNA-p1	hypothetical protein, conserved	13	34.2	57.282	512	512	0.0391108	3.46788	451	2404	2.41424	hypothetical protein, conserved
Tb11.02.5430b.1-p1;Tb11.02.5430:mRNA-p1	Tb11.02.5430b.1-p1;Tb11.02.5430:mRNA-p1	hypothetical protein, conserved	5;5	14.9	44.407	410	410;410	0.0391108	3.4666	452	3914	3.11425	hypothetical protein, conserved
Tb927.11.13180:mRNA-p1	Tb927.11.13180:mRNA-p1	Present in the outer mitochondrial membrane proteome 10	12	35.5	61.21	560	560	0.0391108	3.46329	453	931	1.03927	Present in the outer mitochondrial membrane proteome 10
Tb927.1.3910:mRNA-p1	Tb927.1.3910:mRNA-p1	Anaphase-promoting complex subunit CDC23	23	29.5	99.782	907	907	0.0391108	3.46048	454	3479	2.93791	Anaphase-promoting complex subunit CDC23
Tb927.11.3940:mRNA-p1	Tb927.11.3940:mRNA-p1	hypothetical protein, conserved	3	10	36.265	321	321	0.0391108	3.46004	455	5555	3.60985	hypothetical protein, conserved
Tb927.11.16640:mRNA-p1	Tb927.11.16640:mRNA-p1	Uncharacterised protein family UPF0564, putative	24	31.5	87.372	775	775	0.0391108	3.45869	456	4484	3.29768	Uncharacterised protein family UPF0564, putative
Tb927.8.6850:mRNA-p1	Tb927.8.6850:mRNA-p1	Zinc finger, C3HC4 type (RING finger)/EF-hand domain pair, putative	2	8.7	32.389	286	286	0.0391108	3.44541	457	3834	3.06858	Zinc finger, C3HC4 type (RING finger)/EF-hand domain pair, putative
Tb927.10.3680:mRNA-p1	Tb927.10.3680:mRNA-p1	hypothetical protein, conserved	2	11.8	31.824	288	288	0.0391108	3.4347	458	4940	3.43109	hypothetical protein, conserved
Tb927.11.9510:mRNA-p1	Tb927.11.9510:mRNA-p1	nucleic acid binding protein, putative	5	12.4	56.606	516	516	0.0391108	3.42887	459	3543	2.94841	nucleic acid binding protein, putative
Tb927.6.3710:mRNA-p1	Tb927.6.3710:mRNA-p1	hypothetical protein, conserved	5	10.6	78.289	718	718	0.0391108	3.41182	460	4438	3.2702	hypothetical protein, conserved
Tb927.11.4690:mRNA-p1	Tb927.11.4690:mRNA-p1	mitochondrial DNA polymerase I protein B	23	20.3	158.71	1404	1404	0.0391108	3.40615	461	3558	2.94823	mitochondrial DNA polymerase I protein B
Tb927.10.8710:mRNA-p1	Tb927.10.8710:mRNA-p1	centrin-3	14	80	18.801	165	165	0.0391108	3.40507	462	2400	2.37707	centrin-3
Tb927.3.5450:mRNA-p1	Tb927.3.5450:mRNA-p1	Basal body protein	11	18.8	95.977	899	899	0.038935	3.38228	463	3047	2.71831	Basal body protein
Tb927.11.8430:mRNA-p1	Tb927.11.8430:mRNA-p1	hypothetical protein, conserved	3	27.6	28.556	261	261	0.038935	3.37976	464	3313	2.83594	hypothetical protein, conserved
Tb927.1.3950:mRNA-p1	Tb927.1.3950:mRNA-p1	alanine aminotransferase	12	32.7	55.704	504	504	0.0354528	3.34927	465	429	-0.116253	alanine aminotransferase
Tb927.9.3760:mRNA-p1	Tb927.9.3760:mRNA-p1	Nucleoporin GLE2	13	55.9	38.351	349	349	0.0352926	3.34296	466	2085	2.16165	Nucleoporin GLE2
Tb927.7.2470:mRNA-p1	Tb927.7.2470:mRNA-p1	GTPase activating protein, putative	7	11.8	80.855	718	718	0.0352926	3.33855	467	4793	3.35943	GTPase activating protein, putative
Tb927.9.12720:mRNA-p1	Tb927.9.12720:mRNA-p1	Ribonuclease D	3	13.6	42.982	390	390	0.0345913	3.32696	468	5927	3.66272	Ribonuclease D
Tb927.9.12360:mRNA-p1	Tb927.9.12360:mRNA-p1	RNA-binding protein, putative	6	10.7	61.658	560	560	0.0316665	3.30279	469	2429	2.3727	RNA-binding protein, putative
Tb927.9.3400:mRNA-p1	Tb927.9.3400:mRNA-p1	endo-beta-N-acetylglucosaminidase, putative	22	27.9	115.9	1051	1051	0.0309524	3.29202	470	1588	1.75648	endo-beta-N-acetylglucosaminidase, putative
Tb927.11.5290:mRNA-p1	Tb927.11.5290:mRNA-p1	mitochondrial carrier protein	7	24.5	29.883	282	282	0.029588	3.27715	471	2134	2.17976	mitochondrial carrier protein
Tb927.10.8560:mRNA-p1	Tb927.10.8560:mRNA-p1	small GTPase, putative	2	8	24.28	226	226	0.029588	3.27501	472	4263	3.17501	small GTPase, putative
Tb927.10.1560:mRNA-p1	Tb927.10.1560:mRNA-p1	Nucleolar protein 91	16	22.4	91.596	827	827	0.029588	3.27425	473	168	-1.49338	Nucleolar protein 91
Tb927.3.2860:mRNA-p1	Tb927.3.2860:mRNA-p1	hypothetical protein, conserved	6	32.7	34.04	300	300	0.029588	3.27171	474	4673	3.30139	hypothetical protein, conserved
Tb927.9.15470:mRNA-p1;Tb11.v5.0819.1-p1	Tb927.9.15470:mRNA-p1	kinesin, putative	16;4	29.8	74.614	681	681;259	0.029588	3.26954	475	1892	1.99391	kinesin, putative
Tb927.1.2550:mRNA-p1;Tb927.1.2530:mRNA-p1;Tb927.1.2510:mRNA-p1;Tb927.1.2490:mRNA-p1;Tb927.1.2470:mRNA-p1;Tb927.1.2450:mRNA-p1;Tb927.1.2430:mRNA-p1	Tb927.1.2550:mRNA-p1;Tb927.1.2530:mRNA-p1;Tb927.1.2510:mRNA-p1;Tb927.1.2490:mRNA-p1;Tb927.1.2470:mRNA-p1;Tb927.1.2450:mRNA-p1;Tb927.1.2430:mRNA-p1	histone H3, putative	6;6;6;6;6;6;6	36.1	14.75	133	133;133;133;133;133;133;133	0.029588	3.26926	476	180	-1.40296	histone H3, putative
Tb927.11.16850:mRNA-p1	Tb927.11.16850:mRNA-p1	Golgi transport complex subunit 5, putative	6	7.6	97.188	881	881	0.029588	3.26878	477	5363	3.49098	Golgi transport complex subunit 5, putative
Tb927.10.9190.1:mRNA-p1;Tb927.10.9190.2:mRNA-p1	Tb927.10.9190.1:mRNA-p1;Tb927.10.9190.2:mRNA-p1	isoleucyl-tRNA synthetase, putative	36;35	32.5	123.47	1077	1077;1143	0.029588	3.25864	478	641	0.423314	isoleucyl-tRNA synthetase, putative
Tb927.10.6190:mRNA-p1	Tb927.10.6190:mRNA-p1	aldehyde dehydrogenase, putative	4	13.1	54.033	503	503	0.029588	3.25694	479	6447	3.75053	aldehyde dehydrogenase, putative
Tb927.3.1290:mRNA-p1	Tb927.3.1290:mRNA-p1	cullin 4B, putative	10	14.4	105.84	947	947	0.029588	3.25177	480	2424	2.33628	cullin 4B, putative
Tb927.10.7680:mRNA-p1	Tb927.10.7680:mRNA-p1	GTPase activating protein, putative	18	36.8	60.165	530	530	0.029588	3.2457	481	1510	1.65044	GTPase activating protein, putative
Tb927.11.9270:mRNA-p1	Tb927.11.9270:mRNA-p1	differentiation inhibitory kinase	3	3.6	96.779	858	858	0.029588	3.22918	482	3469	2.84741	differentiation inhibitory kinase
Tb927.11.4800:mRNA-p1	Tb927.11.4800:mRNA-p1	clathrin coat assembly protein, putative	24	47	54.924	492	492	0.029588	3.22075	483	1483	1.61842	clathrin coat assembly protein, putative
Tb927.10.2780:mRNA-p1;Tb11.v5.0608.1-p1;Tb11.v5.0609.1-p1	Tb927.10.2780:mRNA-p1	DNA-directed RNA polymerase III subunit C1	27;10;4	18.2	170.29	1530	1530;543;398	0.029588	3.21219	484	1098	1.1818	DNA-directed RNA polymerase III subunit C1
Tb927.8.1680:mRNA-p1	Tb927.8.1680:mRNA-p1	kinetoplastid kinetochore protein 12	3	14	23.036	200	200	0.0283207	3.1919	485	5455	3.49152	kinetoplastid kinetochore protein 12
Tb927.11.7350:mRNA-p1	Tb927.11.7350:mRNA-p1	Histone H2B variant V	4	32.9	15.786	143	143	0.0283207	3.18756	486	793	0.706365	Histone H2B variant V
Tb927.11.14200:mRNA-p1	Tb927.11.14200:mRNA-p1	ubiquitin-conjugating enzyme E2, putative	5	27.1	28.163	247	247	0.0270524	3.1721	487	1415	1.53881	ubiquitin-conjugating enzyme E2, putative
Tb927.11.2470:mRNA-p1	Tb927.11.2470:mRNA-p1	metallo-peptidase, Clan MF, Family M17	16	41.9	60.585	565	565	0.0270524	3.17035	488	561	0.20112	metallo-peptidase, Clan MF, Family M17
Tb927.11.11650:mRNA-p1	Tb927.11.11650:mRNA-p1	Centrosomal protein of 164 kDa, putative	15	19.1	111.17	1006	1006	0.0270524	3.16661	489	4858	3.31246	Centrosomal protein of 164 kDa, putative
Tb927.9.10920:mRNA-p1	Tb927.9.10920:mRNA-p1	kinetoplastid kinetochore protein 3	13	13.1	118.15	1058	1058	0.0270524	3.16175	490	2277	2.21628	kinetoplastid kinetochore protein 3
Tb927.6.2840:mRNA-p1	Tb927.6.2840:mRNA-p1	Serine/threonine-protein kinase RIO2, putative	34	57.3	54.931	478	478	0.0255298	3.13931	491	4254	3.11503	Serine/threonine-protein kinase RIO2, putative
Tb927.3.5190:mRNA-p1	Tb927.3.5190:mRNA-p1	hypothetical protein, conserved	2	9.5	41.094	358	358	0.0241594	3.1264	492	6550	3.73476	hypothetical protein, conserved
Tb927.11.10600:mRNA-p1	Tb927.11.10600:mRNA-p1	hypothetical protein, conserved	4	16.6	42.461	362	362	0.0241594	3.12283	493	7034	3.83469	hypothetical protein, conserved
Tb927.6.3690:mRNA-p1	Tb927.6.3690:mRNA-p1	pre-mRNA cleavage complex II Clp1-like, conserved	10	31	46.047	423	423	0.0241594	3.12181	494	3856	2.96452	pre-mRNA cleavage complex II Clp1-like, conserved
Tb927.4.4280:mRNA-p1;Tb927.4.4260:mRNA-p1;Tb927.4.4240:mRNA-p1	Tb927.4.4280:mRNA-p1;Tb927.4.4260:mRNA-p1;Tb927.4.4240:mRNA-p1	hypothetical protein, conserved	9;9;9	30.6	36.212	330	330;330;330	0.0241594	3.12139	495	940	0.925232	hypothetical protein, conserved
Tb927.3.4000:mRNA-p1	Tb927.3.4000:mRNA-p1	clathrin coat assembly protein ap19, putative	4	33.3	18.409	159	159	0.0241594	3.11935	496	2045	2.04369	clathrin coat assembly protein ap19, putative
Tb927.10.1540:mRNA-p1	Tb927.10.1540:mRNA-p1	zinc finger protein family member, putative	6	15.6	60.136	564	564	0.0241594	3.10599	497	3395	2.77209	zinc finger protein family member, putative
Tb927.2.3990:mRNA-p1	Tb927.2.3990:mRNA-p1	GRIP-related Arf-binding domain containing protein, putative	49	49.7	115.86	1058	1058	0.0241594	3.10506	498	2434	2.28911	GRIP-related Arf-binding domain containing protein, putative
Tb927.4.2800:mRNA-p1	Tb927.4.2800:mRNA-p1	R3H-associated N-terminal domain containing protein, putative	3	7.8	54.283	486	486	0.0241594	3.09181	499	7149	3.84063	R3H-associated N-terminal domain containing protein, putative
Tb927.1.190:pseudogenic_transcript-p1	Tb927.1.190:pseudogenic_transcript-p1	retrotransposon hot spot protein (RHS, pseudogene), putative	11	15.7	94.659	830	830	0.0238702	3.08402	500	718	0.522056	retrotransposon hot spot protein (RHS, pseudogene), putative
Tb927.7.5490:mRNA-p1	Tb927.7.5490:mRNA-p1	protein arginine n-methyltransferase 7	5	20.3	44.026	390	390	0.0217099	3.06551	501	1983	1.9848	protein arginine n-methyltransferase 7
Tb927.6.4090:mRNA-p1	Tb927.6.4090:mRNA-p1	chaperonin HSP60, mitochondrial precursor, putative	14	34	58.37	541	541	0.0207932	3.05284	502	1612	1.68309	chaperonin HSP60, mitochondrial precursor, putative
Tb927.7.2170:mRNA-p1	Tb927.7.2170:mRNA-p1	Nucleolar protein 168	36	27.5	168.67	1481	1481	0.019692	3.04154	503	2012	2	Nucleolar protein 168
Tb927.3.3830:mRNA-p1	Tb927.3.3830:mRNA-p1	hypothetical protein, conserved	11	42.3	42.628	378	378	0.019692	3.04113	504	1210	1.26351	hypothetical protein, conserved
Tb927.6.4390:mRNA-p1	Tb927.6.4390:mRNA-p1	kinesin, putative	75	58.4	125.9	1111	1111	0.019692	3.0396	505	904	0.840039	kinesin, putative
Tb927.11.7190.1-p1	Tb927.11.7190.1-p1	hypothetical protein	4	17.8	24.904	219	219	0.019692	3.03205	506	4513	3.15688	hypothetical protein
Tb927.2.380:mRNA-p1	Tb927.2.380:mRNA-p1	retrotransposon hot spot protein 2 (RHS2), putative	7	7	90.713	789	789	0.019692	3.02747	507	1172	1.20891	retrotransposon hot spot protein 2 (RHS2), putative
Tb927.9.5320:mRNA-p1	Tb927.9.5320:mRNA-p1	nucleolar RNA binding protein, putative	30	67.7	46.864	427	427	0.019692	3.02312	508	499	-0.0257887	nucleolar RNA binding protein, putative
Tb927.11.7080:mRNA-p1;Tb927.11.7060:mRNA-p1	Tb927.11.7080:mRNA-p1;Tb927.11.7060:mRNA-p1	acidocalcisomal pyrophosphatase	8;7	26.6	47.296	414	414;414	0.019692	3.02239	509	590	0.213049	acidocalcisomal pyrophosphatase
Tb927.10.13180:mRNA-p1	Tb927.10.13180:mRNA-p1	Nrap protein, putative	27	28.4	136.67	1236	1236	0.019692	3.01586	510	1994	1.9671	Nrap protein, putative
Tb927.2.1810:mRNA-p1	Tb927.2.1810:mRNA-p1	chromatin-remodeling complex atpase chain iswi	16	13.8	132.76	1160	1160	0.019692	3.00411	511	1443	1.49768	chromatin-remodeling complex atpase chain iswi
Tb927.8.4560:mRNA-p1	Tb927.8.4560:mRNA-p1	hypothetical protein, conserved	9	9.4	138.57	1258	1258	0.0191017	2.99057	512	5020	3.29347	hypothetical protein, conserved
Tb927.8.1950:mRNA-p1	Tb927.8.1950:mRNA-p1	hypothetical protein, conserved	24	39.9	78.766	710	710	0.0191017	2.98966	513	2292	2.15958	hypothetical protein, conserved
Tb927.8.2600:mRNA-p1	Tb927.8.2600:mRNA-p1	WD domain, G-beta repeat/BING4CT (NUC141) domain containing protein, putative	11	25.1	73.024	646	646	0.0191017	2.98398	514	3093	2.58917	WD domain, G-beta repeat/BING4CT (NUC141) domain containing protein, putative
Tb927.11.6170:mRNA-p1	Tb927.11.6170:mRNA-p1	protein transport protein SEC31, putative	25	29.7	131.1	1231	1231	0.0191017	2.9788	515	806	0.646207	protein transport protein SEC31, putative
Tb927.2.3340:mRNA-p1	Tb927.2.3340:mRNA-p1	hypothetical protein	2	17.7	23.403	215	215	0.0191017	2.97736	516	2925	2.50299	hypothetical protein
Tb927.10.8720:mRNA-p1	Tb927.10.8720:mRNA-p1	CCR4-NOT transcription complex subunit 10, putative	12	29.5	61.501	555	555	0.0191017	2.97539	517	1332	1.36536	CCR4-NOT transcription complex subunit 10, putative
Tb927.9.2470:mRNA-p1;Tb927.9.2490:mRNA-p1	Tb927.9.2470:mRNA-p1;Tb927.9.2490:mRNA-p1	nucleolar protein	23;16	35.5	86.202	760	760;579	0.0191017	2.97439	518	134	-1.95072	nucleolar protein
Tb927.10.9040:mRNA-p1;Tb11.v5.0509.1-p1	Tb927.10.9040:mRNA-p1	hypothetical protein, conserved	5;2	3.5	168.22	1540	1540;418	0.0191017	2.97293	519	5801	3.4825	hypothetical protein, conserved
Tb927.9.11220:mRNA-p1	Tb927.9.11220:mRNA-p1	tRNA import complex component, putative	15	41.3	41.551	356	356	0.0191017	2.97205	520	2320	2.15754	tRNA import complex component, putative
Tb927.7.4570:mRNA-p1;Tb11.v5.0270.1-p1	Tb927.7.4570:mRNA-p1;Tb11.v5.0270.1-p1	inosine-guanine nucleoside hydrolase	7;7	19.6	39.39	357	357;357	0.0191017	2.96172	521	391	-0.414115	inosine-guanine nucleoside hydrolase
Tb927.7.3290:mRNA-p1	Tb927.7.3290:mRNA-p1	WD domain, G-beta repeat, putative	4	15.3	40.159	373	373	0.0191017	2.95358	522	2857	2.45238	WD domain, G-beta repeat, putative
Tb927.11.3770:mRNA-p1	Tb927.11.3770:mRNA-p1	Dpy-30 motif containing protein, putative	9	48.9	28.969	262	262	0.0191017	2.9519	523	1023	0.967923	Dpy-30 motif containing protein, putative
Tb927.7.2790:mRNA-p1	Tb927.7.2790:mRNA-p1	Component of motile flagella 10	6	12.7	79.302	701	701	0.0191017	2.95079	524	1630	1.63723	Component of motile flagella 10
Tb927.4.3760:mRNA-p1	Tb927.4.3760:mRNA-p1	hypothetical protein	6	18.2	45.069	401	401	0.0191017	2.93543	525	6070	3.53131	hypothetical protein
Tb927.10.6220:mRNA-p1	Tb927.10.6220:mRNA-p1	5-3 exoribonuclease D	14	24.3	90.941	801	801	0.0191017	2.9353	526	2953	2.48905	5-3 exoribonuclease D
Tb927.6.4300:mRNA-p1;Tb927.6.4280:mRNA-p1	Tb927.6.4300:mRNA-p1;Tb927.6.4280:mRNA-p1	glyceraldehyde 3-phosphate dehydrogenase, glycosomal	42;42	89.1	39.047	359	359;359	0.0191017	2.93167	527	15	-5.13477	glyceraldehyde 3-phosphate dehydrogenase, glycosomal
Tb927.7.740:mRNA-p1	Tb927.7.740:mRNA-p1	chaperone protein DnaJ, putative	3	9	61.973	547	547	0.0191017	2.92625	528	4988	3.23985	chaperone protein DnaJ, putative
Tb927.11.11170:mRNA-p1	Tb927.11.11170:mRNA-p1	hypothetical protein, conserved	3	26.3	19.424	171	171	0.0191017	2.92361	529	3460	2.70943	hypothetical protein, conserved
Tb927.10.620:mRNA-p1	Tb927.10.620:mRNA-p1	hypothetical protein, conserved	3	10.3	60.742	534	534	0.0191017	2.91748	530	5604	3.40239	hypothetical protein, conserved
Tb927.10.11450:mRNA-p1	Tb927.10.11450:mRNA-p1	TFIIF-stimulated CTD phosphatase, putative	18	35.8	79.214	729	729	0.0191017	2.91578	531	3862	2.86256	TFIIF-stimulated CTD phosphatase, putative
Tb927.11.9320:mRNA-p1	Tb927.11.9320:mRNA-p1	hypothetical protein, conserved	4	25.1	23.715	211	211	0.0191017	2.90634	532	3504	2.7195	hypothetical protein, conserved
Tb927.9.4000:mRNA-p1;Tb927.9.3930:mRNA-p1	Tb927.9.4000:mRNA-p1;Tb927.9.3930:mRNA-p1	hypothetical protein, conserved	2;2	9.4	38.3	361	361;361	0.0191017	2.90358	533	2194	2.04136	hypothetical protein, conserved
Tb927.9.7520:mRNA-p1	Tb927.9.7520:mRNA-p1	hypothetical protein, conserved	26	70.5	38.016	346	346	0.0191017	2.89573	534	220	-1.27934	hypothetical protein, conserved
Tb927.11.2250:mRNA-p1	Tb927.11.2250:mRNA-p1	conserved protein, unknown function	14	58.1	26.94	241	241	0.0191017	2.89122	535	1770	1.72614	conserved protein, unknown function
Tb927.8.2120:mRNA-p1	Tb927.8.2120:mRNA-p1	hypothetical protein, conserved	4	14.5	39.406	366	366	0.0191017	2.88701	536	2196	2.03457	hypothetical protein, conserved
Tb927.7.930:mRNA-p1	Tb927.7.930:mRNA-p1	zinc finger CCCH domain containing protein 17	5	18.8	46.178	410	410	0.0191017	2.87744	537	2640	2.29754	zinc finger CCCH domain containing protein 17
Tb927.8.4190:mRNA-p1	Tb927.8.4190:mRNA-p1	hypothetical protein, conserved	2	10	26.02	231	231	0.0191017	2.87668	538	2911	2.43584	hypothetical protein, conserved
Tb927.11.3300:mRNA-p1	Tb927.11.3300:mRNA-p1	Spindle assembly abnormal 4	30	34.9	107.86	932	932	0.0191017	2.87193	539	1370	1.34582	Spindle assembly abnormal 4
Tb927.11.5490:mRNA-p1	Tb927.11.5490:mRNA-p1	Polyphosphoinositide phosphatase, putative	19	14.7	174.36	1560	1560	0.0191017	2.86956	540	6682	3.62925	Polyphosphoinositide phosphatase, putative
Tb927.11.10570:mRNA-p1	Tb927.11.10570:mRNA-p1	LSU ribosomal protein, mitochondrial, putative	2	7.8	39.513	333	333	0.0191017	2.86873	541	4952	3.19431	LSU ribosomal protein, mitochondrial, putative
Tb927.11.6280:mRNA-p1	Tb927.11.6280:mRNA-p1	pyruvate phosphate dikinase	11	15.2	100.45	913	913	0.0191017	2.86746	542	1498	1.46667	pyruvate phosphate dikinase
Tb927.10.5690:mRNA-p1	Tb927.10.5690:mRNA-p1	procyclin-associated gene 2 (PAG2) protein, putative	6	15.8	43.075	387	387	0.0191017	2.86706	543	4475	3.04286	procyclin-associated gene 2 (PAG2) protein, putative
Tb927.6.640:mRNA-p1	Tb927.6.640:mRNA-p1	ApaH-like phosphatase ALPH1	22	37.1	79.106	734	734	0.0191017	2.86389	544	1214	1.15809	ApaH-like phosphatase ALPH1
Tb927.4.4090:mRNA-p1	Tb927.4.4090:mRNA-p1	hypothetical protein, conserved	4	15.2	35.549	329	329	0.0191017	2.85837	545	4806	3.14051	hypothetical protein, conserved
Tb927.11.16540:mRNA-p1	Tb927.11.16540:mRNA-p1	Roadblock/LC7 domain containing protein, putative	2	26.5	10.913	98	98	0.0191017	2.85763	546	2000	1.87303	Roadblock/LC7 domain containing protein, putative
Tb927.4.3410:mRNA-p1	Tb927.4.3410:mRNA-p1	selenoprotein, putative	5	8.3	85.794	779	779	0.0191017	2.85208	547	4366	2.9967	selenoprotein, putative
Tb927.10.810:mRNA-p1	Tb927.10.810:mRNA-p1	Pentatricopeptide repeat protein (PPR), putative	7	19.6	67.488	603	603	0.0191017	2.84965	548	2655	2.27646	Pentatricopeptide repeat protein (PPR), putative
Tb927.3.4390:mRNA-p1	Tb927.3.4390:mRNA-p1	dihydrolipoamide dehydrogenase	9	22.2	55.839	505	505	0.0191017	2.84171	549	2962	2.43169	dihydrolipoamide dehydrogenase
Tb927.9.6510:mRNA-p1	Tb927.9.6510:mRNA-p1	Mitochondrial SSU ribosomal protein, putative	10	18.5	75.135	666	666	0.0191017	2.84088	550	5810	3.40103	Mitochondrial SSU ribosomal protein, putative
Tb927.11.7210:mRNA-p1;Tb11.02.5050b.1-p1	Tb927.11.7210:mRNA-p1;Tb11.02.5050b.1-p1	eukaryotic translation initiation factor 2-alpha kinase 1, putative	8;5	8.8	137.63	1236	1236;933	0.0191017	2.84075	551	3706	2.74974	eukaryotic translation initiation factor 2-alpha kinase 1, putative
Tb11.v5.0553.1-p1	Tb11.v5.0553.1-p1	ubiquitin hydrolase, putative	5	15.9	60.133	536	536	0.0191017	2.84007	552	4686	3.08562	ubiquitin hydrolase, putative
Tb927.7.1790:mRNA-p1	Tb927.7.1790:mRNA-p1	Adenine phosphoribosyltransferase, putative	4	24.8	25.624	230	230	0.0191017	2.83974	553	1995	1.85104	Adenine phosphoribosyltransferase, putative
Tb927.8.7980:mRNA-p1;Tb927.4.4380:mRNA-p1	Tb927.8.7980:mRNA-p1;Tb927.4.4380:mRNA-p1	Pyrophosphate-energized vacuolar membrane proton pump 2, putative	16;16	24.9	86.003	826	826;826	0.0191017	2.8356	554	549	-0.0130798	Pyrophosphate-energized vacuolar membrane proton pump 2, putative
Tb927.7.6340:mRNA-p1	Tb927.7.6340:mRNA-p1	hypothetical protein, conserved	8	24.7	48.093	442	442	0.0191017	2.83442	555	1830	1.72128	hypothetical protein, conserved
Tb927.8.8180:mRNA-p1;Tb927.4.4150:mRNA-p1	Tb927.8.8180:mRNA-p1;Tb927.4.4150:mRNA-p1	mitochondrial RNA binding complex 1 subunit	7;7	7.9	103.45	934	934;934	0.0191017	2.83221	556	3158	2.50585	mitochondrial RNA binding complex 1 subunit
Tb927.11.715:mRNA-p1;Tb927.11.18680:mRNA-p1;Tb11.0845:mRNA-p1	Tb927.11.715:mRNA-p1;Tb927.11.18680:mRNA-p1;Tb11.0845:mRNA-p1	dynein light chain LC8, putative	4;4;4	51.1	10.429	90	90;90;90	0.0191017	2.82744	557	397	-0.488538	dynein light chain LC8, putative
Tb927.11.3130:mRNA-p1	Tb927.11.3130:mRNA-p1	glycosomal transporter (GAT2)	5	13.7	71.266	641	641	0.0191017	2.82682	558	2418	2.11548	glycosomal transporter (GAT2)
Tb927.6.2850:mRNA-p1	Tb927.6.2850:mRNA-p1	ESAG8-associated protein, putative	6	14.6	61.928	560	560	0.0191017	2.82163	559	5535	3.30766	ESAG8-associated protein, putative
Tb927.10.3340:mRNA-p1;Tb11.v5.1022.1-p1	Tb927.10.3340:mRNA-p1;Tb11.v5.1022.1-p1	CMGC/MAPK protein kinase, putative	8;8	13	98.706	891	891;891	0.0191017	2.81785	560	3099	2.4683	CMGC/MAPK protein kinase, putative
Tb927.9.8000:mRNA-p1	Tb927.9.8000:mRNA-p1	ubiquitin-protein ligase, putative	4	24	17.132	150	150	0.0191017	2.78124	561	788	0.490195	ubiquitin-protein ligase, putative
Tb927.11.890:mRNA-p1	Tb927.11.890:mRNA-p1	hypothetical protein, conserved	3	2.7	135.77	1222	1222	0.0191017	2.77724	562	7149	3.6691	hypothetical protein, conserved
Tb927.10.5640:mRNA-p1	Tb927.10.5640:mRNA-p1	Gem-associated protein 2, putative	11	22.8	55.428	495	495	0.0191017	2.77353	563	3534	2.6501	Gem-associated protein 2, putative
Tb927.10.9000:mRNA-p1	Tb927.10.9000:mRNA-p1	hypothetical protein, conserved	5	4	181.55	1641	1641	0.0191017	2.76876	564	4553	3.01305	hypothetical protein, conserved
Tb927.6.3670:mRNA-p1	Tb927.6.3670:mRNA-p1	paraflagellar rod component, putative	56	19.4	359.21	3222	3222	0.0191017	2.76181	565	1682	1.57385	paraflagellar rod component, putative
Tb927.3.1670:mRNA-p1	Tb927.3.1670:mRNA-p1	hypothetical protein, conserved	3	3.7	112.56	1027	1027	0.0191017	2.7602	566	1311	1.21179	hypothetical protein, conserved
Tb927.9.6320:mRNA-p1;Tb11.v5.0828.1-p1	Tb927.9.6320:mRNA-p1;Tb11.v5.0828.1-p1	hypothetical protein, conserved	11;10	50.2	31.904	291	291;294	0.0191017	2.75958	567	3787	2.73963	hypothetical protein, conserved
Tb927.11.3850:mRNA-p1	Tb927.11.3850:mRNA-p1	AMP deaminase, putative	18	12.1	175.55	1558	1558	0.0191017	2.75548	568	3654	2.68551	AMP deaminase, putative
Tb927.10.1620:mRNA-p1;Tb11.v5.0643.1-p1	Tb927.10.1620:mRNA-p1;Tb11.v5.0643.1-p1	phosphoserine/threonine/tyrosine-binding protein, putative	11;10	29.7	59.944	555	555;469	0.0191017	2.74982	569	2565	2.17246	phosphoserine/threonine/tyrosine-binding protein, putative
Tb927.10.13290:mRNA-p1	Tb927.10.13290:mRNA-p1	ethanolamine phosphotransferase (EPT)	2	6.8	45.283	412	412	0.0191017	2.74314	570	2534	2.15238	ethanolamine phosphotransferase (EPT)
Tb927.11.1230:mRNA-p1	Tb927.11.1230:mRNA-p1	hypothetical protein, conserved	2	5.1	53.366	448	448	0.0191017	2.74176	571	2047	1.84195	hypothetical protein, conserved
Tb927.10.10390:mRNA-p1	Tb927.10.10390:mRNA-p1	trypanothione reductase	8	20.3	53.156	492	492	0.0191017	2.74112	572	460	-0.314381	trypanothione reductase
Tb927.2.5890:mRNA-p1	Tb927.2.5890:mRNA-p1	hypothetical protein, conserved	4	10.2	51.13	452	452	0.0191017	2.73032	573	5428	3.24381	hypothetical protein, conserved
Tb927.10.2040:mRNA-p1	Tb927.10.2040:mRNA-p1	STE group serine/threonine-protein kinase, putative	10	15.2	93.874	873	873	0.0191017	2.72832	574	2621	2.19099	STE group serine/threonine-protein kinase, putative
Tb927.7.4710:mRNA-p1	Tb927.7.4710:mRNA-p1	Mitochondrial ribosomal protein L46	3	11.5	33.994	296	296	0.0191017	2.72561	575	4729	3.0399	Mitochondrial ribosomal protein L46
Tb927.10.13990:mRNA-p1	Tb927.10.13990:mRNA-p1	Pentatricopeptide repeat protein (PPR), putative	12	46.8	39.633	361	361	0.0191017	2.72295	576	5509	3.25765	Pentatricopeptide repeat protein (PPR), putative
Tb927.5.1780:mRNA-p1	Tb927.5.1780:mRNA-p1	hypothetical protein, conserved	8	25.3	48.192	467	467	0.0191017	2.72158	577	3972	2.78322	hypothetical protein, conserved
Tb927.1.1100:mRNA-p1	Tb927.1.1100:mRNA-p1	Basal body protein	46	56.2	108.81	970	970	0.0191017	2.7201	578	4633	3.00281	Basal body protein
Tb927.10.12720:mRNA-p1	Tb927.10.12720:mRNA-p1	hypothetical protein, conserved	33	35.5	104.64	902	902	0.0191017	2.71996	579	2521	2.12236	hypothetical protein, conserved
Tb927.10.8980:mRNA-p1	Tb927.10.8980:mRNA-p1	hypothetical protein, conserved	8	42.6	17.598	169	169	0.0191017	2.71249	580	676	0.22097	hypothetical protein, conserved
Tb927.7.4760:mRNA-p1;Tb11.v5.0159.1-p1	Tb927.7.4760:mRNA-p1;Tb11.v5.0159.1-p1	hypothetical protein, conserved	4;3	13.7	58.815	539	539;493	0.0191017	2.70113	581	2375	2.03132	hypothetical protein, conserved
Tb927.9.7760:mRNA-p1	Tb927.9.7760:mRNA-p1	DENN (AEX-3) domain containing protein, putative	20	27.2	100.23	923	923	0.0191017	2.7007	582	3582	2.62167	DENN (AEX-3) domain containing protein, putative
Tb927.10.13880:mRNA-p1	Tb927.10.13880:mRNA-p1	hypothetical protein, conserved	8	8.7	120.87	1086	1086	0.0191017	2.69703	583	3417	2.55116	hypothetical protein, conserved
Tb927.10.8950:mRNA-p1;Tb927.10.8970:mRNA-p1	Tb927.10.8950:mRNA-p1;Tb927.10.8970:mRNA-p1	kinetoplast-associated protein 4 isoform 1	5;5	23.8	14.183	126	126;127	0.0191017	2.69264	584	2517	2.10766	kinetoplast-associated protein 4 isoform 1
Tb11.v5.0831.1-p1;Tb927.3.3400:mRNA-p1	Tb11.v5.0831.1-p1;Tb927.3.3400:mRNA-p1	kinesin motor domain containing protein, putative	4;3	8.5	63.759	578	578;578	0.0191017	2.69253	585	6030	3.36565	kinesin motor domain containing protein, putative
Tb927.11.13300:mRNA-p1	Tb927.11.13300:mRNA-p1	Intraflagellar transport protein 25 homolog, putative	2	14.7	16.922	156	156	0.0191017	2.69218	586	1987	1.76162	Intraflagellar transport protein 25 homolog, putative
Tb927.10.2520:mRNA-p1	Tb927.10.2520:mRNA-p1	PrimPol-like protein 2	3	4.6	81.851	732	732	0.0191017	2.68818	587	3980	2.76134	PrimPol-like protein 2
Tb927.10.510:mRNA-p1;Tb11.v5.0374.1-p1	Tb927.10.510:mRNA-p1;Tb11.v5.0374.1-p1	Present in the outer mitochondrial membrane proteome 19	7;6	27.8	37.06	334	334;334	0.0191017	2.68091	588	2289	1.96083	Present in the outer mitochondrial membrane proteome 19
Tb927.5.2770:mRNA-p1	Tb927.5.2770:mRNA-p1	SET domain containing protein, putative	13	42.8	46.514	407	407	0.0191017	2.6787	589	2172	1.88268	SET domain containing protein, putative
Tb927.9.5520:mRNA-p1	Tb927.9.5520:mRNA-p1	ubiquitin carboxyl-terminal hydrolase, putative	17	15.1	151.16	1342	1342	0.0191017	2.67811	590	1418	1.26507	ubiquitin carboxyl-terminal hydrolase, putative
Tb927.10.1690:mRNA-p1	Tb927.10.1690:mRNA-p1	cytosolic Fe-S cluster assembly factor NBP35, putative	4	19.2	33.284	312	312	0.0191017	2.67695	591	4093	2.79193	cytosolic Fe-S cluster assembly factor NBP35, putative
Tb927.4.5200:mRNA-p1	Tb927.4.5200:mRNA-p1	Nucleoporin NUP62	9	14.5	62.475	641	641	0.0191017	2.66624	592	2169	1.87336	Nucleoporin NUP62
Tb927.10.7280:mRNA-p1;Tb927.5.1150:mRNA-p1	Tb927.10.7280:mRNA-p1	pre-mRNA splicing factor ATP-dependent RNA helicase, putative	38;1	37.8	121.24	1062	1062;722	0.0191017	2.66523	593	1914	1.69049	pre-mRNA splicing factor ATP-dependent RNA helicase, putative
Tb927.11.3840:mRNA-p1	Tb927.11.3840:mRNA-p1	hypothetical protein, conserved	5	12.3	51.411	462	462	0.0191017	2.66364	594	4534	2.93225	hypothetical protein, conserved
Tb927.3.2170:mRNA-p1	Tb927.3.2170:mRNA-p1	translation elongation factor EF-2, putative	14	17.2	98.562	890	890	0.0191017	2.66244	595	3487	2.55102	translation elongation factor EF-2, putative
Tb927.4.2890:mRNA-p1	Tb927.4.2890:mRNA-p1	hypothetical protein, conserved	12	26.3	68.748	631	631	0.0191017	2.65871	596	3697	2.63297	hypothetical protein, conserved
Tb927.9.13990:mRNA-p1	Tb927.9.13990:mRNA-p1	RNA-binding protein, putative	21	59.7	34.618	305	305	0.0191017	2.65705	597	480	-0.314697	RNA-binding protein, putative
Tb927.11.810:mRNA-p1	Tb927.11.810:mRNA-p1	hypothetical protein, conserved	28	39.9	86.684	796	796	0.0191017	2.65147	598	2114	1.82176	hypothetical protein, conserved
Tb927.9.7250:mRNA-p1	Tb927.9.7250:mRNA-p1	hypothetical protein, conserved	3	29.5	20.911	183	183	0.0191017	2.6455	599	4368	2.86634	hypothetical protein, conserved
Tb927.11.14100:mRNA-p1	Tb927.11.14100:mRNA-p1	Double RNA-binding domain containing protein 4	20	50.1	54.707	505	505	0.0191017	2.64549	600	745	0.312278	Double RNA-binding domain containing protein 4
Tb927.8.2820:mRNA-p1	Tb927.8.2820:mRNA-p1	hypothetical protein, conserved	11	35.7	141.11	1292	1292	0.0191017	2.64234	601	1239	1.04374	hypothetical protein, conserved
Tb927.4.5110:mRNA-p1	Tb927.4.5110:mRNA-p1	kinetoplastid kinetochore protein 8	6	25.3	44.568	399	399	0.0191017	2.63952	602	3932	2.70743	kinetoplastid kinetochore protein 8
Tb927.5.1910:mRNA-p1	Tb927.5.1910:mRNA-p1	hypothetical protein, conserved	8	8.5	126.97	1167	1167	0.0191017	2.63797	603	5237	3.11851	hypothetical protein, conserved
Tb927.7.3170:mRNA-p1	Tb927.7.3170:mRNA-p1	Beta-lactamase superfamily domain containing protein, putative	4	14.6	43.185	391	391	0.0191017	2.63216	604	2827	2.22665	Beta-lactamase superfamily domain containing protein, putative
Tb927.11.16830:mRNA-p1	Tb927.11.16830:mRNA-p1	Rab-like 5, small G protein	14	76.3	24.466	219	219	0.0191017	2.6287	605	777	0.360979	Rab-like 5, small G protein
Tb927.10.5680:mRNA-p1	Tb927.10.5680:mRNA-p1	procyclin-associated gene 1 (PAG1) protein, putative	3	11.2	44.022	394	394	0.0191017	2.62779	606	3855	2.66934	procyclin-associated gene 1 (PAG1) protein, putative
Tb927.2.2720:mRNA-p1	Tb927.2.2720:mRNA-p1	STE/STE7 protein kinase, putative	3	2.5	162.18	1501	1501	0.0191017	2.62514	607	4985	3.03783	STE/STE7 protein kinase, putative
Tb927.11.10280:mRNA-p1	Tb927.11.10280:mRNA-p1	metallo-peptidase, Clan MC, Family M14, putative	6	8.2	131.16	1192	1192	0.0191017	2.62367	608	4174	2.77929	metallo-peptidase, Clan MC, Family M14, putative
Tb11.1810b.1-p1;Tb11.1810.1-p1	Tb11.1810b.1-p1;Tb11.1810.1-p1	retrotransposon hot spot protein (RHS, pseudogene), putative	2;2	7.9	29.007	254	254;254	0.0191017	2.62062	609			retrotransposon hot spot protein (RHS, pseudogene), putative
Tb927.9.8250:mRNA-p1	Tb927.9.8250:mRNA-p1	atypical dual specificity phosphatase, putative	4	12.8	47.009	431	431	0.0191017	2.61938	610	5963	3.28916	atypical dual specificity phosphatase, putative
Tb927.10.10380:mRNA-p1	Tb927.10.10380:mRNA-p1	ATP-dependent DEAD/H RNA helicase, putative	4	9.8	56.623	520	520	0.0191017	2.61284	611	3852	2.65636	ATP-dependent DEAD/H RNA helicase, putative
Tb927.4.1600:mRNA-p1	Tb927.4.1600:mRNA-p1	AAA domain containing protein, putative	7	32.9	27.063	234	234	0.0191017	2.60575	612	2441	1.99587	AAA domain containing protein, putative
Tb927.8.4400:mRNA-p1	Tb927.8.4400:mRNA-p1	Outer dynein arm docking complex protein 1, putative	5	10.8	75.932	668	668	0.0191017	2.59735	613	1042	0.765396	Outer dynein arm docking complex protein 1, putative
Tb927.5.1690:mRNA-p1;Tb11.v5.0740.1-p1	Tb927.5.1690:mRNA-p1	hypothetical protein, conserved	15;3	42.4	51.619	462	462;368	0.0191017	2.5933	614	1571	1.35537	hypothetical protein, conserved
Tb927.9.3440:mRNA-p1	Tb927.9.3440:mRNA-p1	cyclophilin type peptidyl-prolyl cis-trans isomerase, putative	3	12.6	35.78	318	318	0.0191017	2.59159	615	2007	1.70638	cyclophilin type peptidyl-prolyl cis-trans isomerase, putative
Tb927.11.13380:mRNA-p1	Tb927.11.13380:mRNA-p1	ATP-dependent helicase, putative	51	28.2	223.56	2026	2026	0.0191017	2.58563	616	2328	1.91809	ATP-dependent helicase, putative
Tb927.8.6330:mRNA-p1	Tb927.8.6330:mRNA-p1	WD domain, G-beta repeat/PFU (PLAA family ubiquitin binding), putative	12	17.3	94.632	886	886	0.0191017	2.58165	617	1867	1.59738	WD domain, G-beta repeat/PFU (PLAA family ubiquitin binding), putative
Tb927.11.7390:mRNA-p1	Tb927.11.7390:mRNA-p1	NADH-ubiquinone oxidoreductase complex I, 21 kDa subunit, putative	3	14.6	34.924	295	295	0.0191017	2.57913	618	5895	3.25381	NADH-ubiquinone oxidoreductase complex I, 21 kDa subunit, putative
Tb927.8.1940:mRNA-p1	Tb927.8.1940:mRNA-p1	endosomal integral membrane protein, putative	2	4.6	70.463	628	628	0.0191017	2.57203	619	2272	1.87595	endosomal integral membrane protein, putative
Tb11.v5.1026.1-p1;Tb927.11.14600:mRNA-p1	Tb11.v5.1026.1-p1;Tb927.11.14600:mRNA-p1	procyclin-associated gene 2-like protein, putative	4;3	12.7	44.593	403	403;403	0.0191017	2.56666	620	6719	3.43791	procyclin-associated gene 2-like protein, putative
Tb927.10.2910:mRNA-p1	Tb927.10.2910:mRNA-p1	splicing factor PTSR1 interacting protein	6	21.2	43.652	378	378	0.0191017	2.5538	621	3195	2.36315	splicing factor PTSR1 interacting protein
Tb927.6.3790:mRNA-p1	Tb927.6.3790:mRNA-p1	valosin-containing protein homolog, putative	24	37.9	85.626	795	795	0.0191017	2.55255	622	4411	2.82612	valosin-containing protein homolog, putative
Tb10.v4.0052:mRNA-p1;Tb927.10.10360:mRNA-p1;Tb10.v4.0053:mRNA-p1	Tb10.v4.0052:mRNA-p1;Tb927.10.10360:mRNA-p1;Tb10.v4.0053:mRNA-p1	microtubule-associated protein 2	3;3;3	39.3	561.21	4880	4880;3198;4119	0.0191017	2.55048	623	63	-3.30581	microtubule-associated protein 2
Tb927.6.2190:mRNA-p1	Tb927.6.2190:mRNA-p1	hypothetical protein, conserved	3	15	31.531	287	287	0.0191017	2.54876	624	4464	2.83872	hypothetical protein, conserved
Tb927.9.2050:mRNA-p1	Tb927.9.2050:mRNA-p1	membrane protein YIP1, putative	6	22.8	46.169	416	416	0.0191017	2.54591	625	3082	2.30194	membrane protein YIP1, putative
Tb927.3.4060:mRNA-p1	Tb927.3.4060:mRNA-p1	asparagine synthetase domain-containing protein 1	6	8.6	92.385	856	856	0.0191017	2.54325	626	5177	3.04788	asparagine synthetase domain-containing protein 1
Tb927.10.420:mRNA-p1	Tb927.10.420:mRNA-p1	Exocyst complex component EXO99	6	7.9	99.073	909	909	0.0191017	2.54072	627	4170	2.73351	Exocyst complex component EXO99
Tb927.11.2510:mRNA-p1	Tb927.11.2510:mRNA-p1	NUC173 domain containing protein, putative	28	25.4	145.69	1292	1292	0.0191017	2.53666	628	3238	2.36627	NUC173 domain containing protein, putative
Tb927.10.15540:mRNA-p1;Tb11.v5.0651.1-p1	Tb927.10.15540:mRNA-p1;Tb11.v5.0651.1-p1	predicted VPS53-like domain protein	28;20	40.4	93.63	835	835;656	0.0191017	2.5366	629	3147	2.32285	predicted VPS53-like domain protein
Tb11.1790.1-p1;Tb927.2.720:pseudogenic_transcript-p1;Tb927.11.17840:pseudogenic_transcript-p1;Tb927.5.160:pseudogenic_transcript-p1	Tb11.1790.1-p1	retrotransposon hot spot protein (RHS, pseudogene), putative	2;0;0;0	2.5	77.705	684	684;145;96;173	0.0191017	2.53318	630			retrotransposon hot spot protein (RHS, pseudogene), putative
Tb927.5.1390:mRNA-p1	Tb927.5.1390:mRNA-p1	64 kDa invariant surface glycoprotein	3	9.2	46.842	434	434	0.0191017	2.52938	631	4214	2.73948	64 kDa invariant surface glycoprotein
Tb927.11.700:mRNA-p1;Tb11.0860:mRNA-p1	Tb927.11.700:mRNA-p1;Tb11.0860:mRNA-p1	hypothetical protein, conserved	9;6	33	38.697	355	355;294	0.0191017	2.5222	632	5756	3.18707	hypothetical protein, conserved
Tb927.11.3220:mRNA-p1	Tb927.11.3220:mRNA-p1	metacaspase	6	18.8	40.18	372	372	0.0191017	2.51895	633	1135	0.842415	metacaspase
Tb927.6.4590.2:mRNA-p1;Tb927.6.4590.1:mRNA-p1;Tb11.v5.0810.1-p1	Tb927.6.4590.2:mRNA-p1;Tb927.6.4590.1:mRNA-p1;Tb11.v5.0810.1-p1	glutamyl-tRNA synthetase, putative	19;19;17	30.6	68.931	607	607;581;471	0.0191017	2.50975	634	594	-0.0940199	glutamyl-tRNA synthetase, putative
Tb927.6.5030:mRNA-p1	Tb927.6.5030:mRNA-p1	Component of motile flagella protein 46	3	7.6	64.845	552	552	0.0191017	2.50831	635	1723	1.44009	Component of motile flagella protein 46
Tb927.9.14480:mRNA-p1	Tb927.9.14480:mRNA-p1	dynein-associated protein, putative	4	65.3	11.13	98	98	0.0191017	2.50131	636	854	0.425209	dynein-associated protein, putative
Tb927.8.1270:mRNA-p1	Tb927.8.1270:mRNA-p1	Nucleolar protein 54	15	34.2	53.545	486	486	0.0191017	2.498	637	2801	2.13658	Nucleolar protein 54
Tb927.9.8160:mRNA-p1	Tb927.9.8160:mRNA-p1	chaperone protein DnaJ, putative	4	8.8	47.83	430	430	0.0191017	2.49447	638	2952	2.21006	chaperone protein DnaJ, putative
Tb927.6.2000:mRNA-p1	Tb927.6.2000:mRNA-p1	spliceosome-associated protein, putative	15	57.7	50.03	456	456	0.0191017	2.49086	639	3017	2.23923	spliceosome-associated protein, putative
Tb927.3.4790:mRNA-p1;Tb927.3.4750:mRNA-p1	Tb927.3.4790:mRNA-p1;Tb927.3.4750:mRNA-p1	Aminopeptidase M1, putative	32;32	40.3	97.251	871	871;871	0.0191017	2.48422	640	731	0.1918	Aminopeptidase M1, putative
Tb927.10.5140:mRNA-p1	Tb927.10.5140:mRNA-p1	Mitogen-activated protein kinase 6	26	64.3	49.74	442	442	0.0191017	2.47788	641	897	0.484784	Mitogen-activated protein kinase 6
Tb927.10.8590:mRNA-p1	Tb927.10.8590:mRNA-p1	flagellum transition zone component	5	36.3	134.45	1278	1278	0.0191017	2.4766	642	3372	2.39296	flagellum transition zone component
Tb927.3.980:mRNA-p1	Tb927.3.980:mRNA-p1	hypothetical protein, conserved	5	8.6	78.463	700	700	0.0191017	2.47644	643	2014	1.64717	hypothetical protein, conserved
Tb927.5.2400:mRNA-p1	Tb927.5.2400:mRNA-p1	Peptidase C19, ubiquitin carboxyl-terminal hydrolase, putative	7	10.5	108.26	986	986	0.0191017	2.47266	644	3892	2.59538	Peptidase C19, ubiquitin carboxyl-terminal hydrolase, putative
Tb927.11.5270:mRNA-p1	Tb927.11.5270:mRNA-p1	ubiquitin carboxyl-terminal hydrolase, putative	5	6.3	85.624	765	765	0.0191017	2.47221	645	3562	2.46532	ubiquitin carboxyl-terminal hydrolase, putative
Tb927.11.10650:mRNA-p1	Tb927.11.10650:mRNA-p1	Adaptor protein complex AP-3 subunit beta-3	5	6.2	100.36	918	918	0.0191017	2.46936	646	3691	2.51441	Adaptor protein complex AP-3 subunit beta-3
Tb927.9.8570:mRNA-p1	Tb927.9.8570:mRNA-p1	COPI associated protein, putative	2	10.4	16.987	154	154	0.0191017	2.46165	647	6478	3.32371	COPI associated protein, putative
Tb927.10.13610:mRNA-p1	Tb927.10.13610:mRNA-p1	zinc-finger of a C2HC-type/Double zinc ribbon, putative	6	14.8	78.791	732	732	0.0191017	2.46032	648	2402	1.89017	zinc-finger of a C2HC-type/Double zinc ribbon, putative
Tb927.6.1470:mRNA-p1	Tb927.6.1470:mRNA-p1	hypothetical protein, conserved	10	26.9	27.521	223	223	0.0191017	2.45526	649	1417	1.12655	hypothetical protein, conserved
Tb927.11.8790:mRNA-p1	Tb927.11.8790:mRNA-p1	target SNARE, putative	6	22	35.541	318	318	0.0191017	2.44594	650	2299	1.82249	target SNARE, putative
Tb927.11.12630:mRNA-p1	Tb927.11.12630:mRNA-p1	hypothetical protein, conserved	3	7.2	57.121	526	526	0.0191017	2.44574	651	2889	2.14984	hypothetical protein, conserved
Tb927.8.1140:mRNA-p1	Tb927.8.1140:mRNA-p1	hypothetical protein, conserved	4	23.6	38.292	351	351	0.0191017	2.44466	652	2800	2.10248	hypothetical protein, conserved
Tb927.7.6950:mRNA-p1	Tb927.7.6950:mRNA-p1	hypothetical protein, conserved	7	12.4	90.421	820	820	0.0191017	2.4444	653	3161	2.27523	hypothetical protein, conserved
Tb927.10.12490:mRNA-p1	Tb927.10.12490:mRNA-p1	kinesin, putative	15	16.6	127.09	1132	1132	0.0191017	2.44397	654	2677	2.03325	kinesin, putative
Tb927.6.670:mRNA-p1	Tb927.6.670:mRNA-p1	exosome complex component RRP45	2	6.6	38.808	363	363	0.0191017	2.44315	655	3982	2.60393	exosome complex component RRP45
Tb927.7.1050:mRNA-p1;Tb927.7.1040:mRNA-p1	Tb927.7.1050:mRNA-p1;Tb927.7.1040:mRNA-p1	40S ribosomal protein S16, putative	16;16	60.4	16.998	149	149;149	0.0191017	2.44134	656	369	-0.830075	40S ribosomal protein S16, putative
Tb927.3.3820:mRNA-p1	Tb927.3.3820:mRNA-p1	hypothetical protein, conserved	3	10.6	45.231	406	406	0.0191017	2.43943	657	1775	1.43385	hypothetical protein, conserved
Tb927.11.4460:mRNA-p1	Tb927.11.4460:mRNA-p1	ALBA-Domain Protein	6	40	14.038	125	125	0.0191017	2.43487	658	551	-0.256035	ALBA-Domain Protein
Tb927.11.710:mRNA-p1;Tb11.0850:mRNA-p1	Tb927.11.710:mRNA-p1;Tb11.0850:mRNA-p1	SCAMP family, putative	3;2	12.2	44.208	401	401;349	0.0191017	2.43067	659	3300	2.32412	SCAMP family, putative
Tb927.10.6820:mRNA-p1	Tb927.10.6820:mRNA-p1	hypothetical protein, conserved	4	11.8	34.82	314	314	0.0191017	2.43023	660	3350	2.34362	hypothetical protein, conserved
Tb927.6.5130:mRNA-p1;Tb927.6.5120:mRNA-p1	Tb927.6.5130:mRNA-p1;Tb927.6.5120:mRNA-p1	60S acidic ribosomal protein P2, putative	9;9	52.3	10.444	107	107;107	0.0191017	2.42878	661	475	-0.476723	60S acidic ribosomal protein P2, putative
Tb927.8.7970:mRNA-p1	Tb927.8.7970:mRNA-p1	hypothetical protein	10	23.9	53.211	494	494	0.0191017	2.4269	662	1245	0.911243	hypothetical protein
Tb927.8.6640:mRNA-p1	Tb927.8.6640:mRNA-p1	Male sterility protein, putative	4	11.4	67.498	604	604	0.0191017	2.42232	663	2147	1.69524	Male sterility protein, putative
Tb927.10.6800:mRNA-p1	Tb927.10.6800:mRNA-p1	developmentally regulated GTP-binding protein, putative	10	32.9	41.267	368	368	0.0191017	2.42129	664	787	0.24518	developmentally regulated GTP-binding protein, putative
Tb927.9.9630:mRNA-p1	Tb927.9.9630:mRNA-p1	TPR repeat/Tetratricopeptide repeat, putative	4	12.1	38.92	355	355	0.0191017	2.41565	665	1474	1.14831	TPR repeat/Tetratricopeptide repeat, putative
Tb927.10.6350:mRNA-p1;Tb11.v5.0271.1-p1	Tb927.10.6350:mRNA-p1;Tb11.v5.0271.1-p1	trypanin	6;6	17	53.923	453	453;453	0.0191017	2.41456	666	1829	1.45746	trypanin
Tb927.2.3400:mRNA-p1	Tb927.2.3400:mRNA-p1	hypothetical protein, conserved	13	40.1	36.602	334	334	0.0191017	2.41362	667	3714	2.47722	hypothetical protein, conserved
Tb927.8.5940:mRNA-p1	Tb927.8.5940:mRNA-p1	hypothetical protein, conserved	3	7.8	54.878	472	472	0.0191017	2.41315	668	2849	2.09254	hypothetical protein, conserved
Tb927.10.7110:mRNA-p1	Tb927.10.7110:mRNA-p1	Myo-inositol 1-phosphate synthase	5	15.7	58.274	528	528	0.0191017	2.40921	669	1460	1.12589	Myo-inositol 1-phosphate synthase
Tb11.v5.0895.1-p1;Tb927.9.12340:mRNA-p1	Tb11.v5.0895.1-p1;Tb927.9.12340:mRNA-p1	hypothetical protein, conserved	7;7	14.5	63.762	574	574;681	0.0191017	2.39873	670	3616	2.43216	hypothetical protein, conserved
Tb927.10.3640:mRNA-p1	Tb927.10.3640:mRNA-p1	nuclear transmembrane protein, putative	5	16.5	31.534	284	284	0.0191017	2.38939	671	1702	1.34285	nuclear transmembrane protein, putative
Tb927.11.7920:mRNA-p1	Tb927.11.7920:mRNA-p1	SUMO-interacting motif-containing protein	5	15.7	47.989	414	414	0.0191017	2.38623	672	6807	3.34049	SUMO-interacting motif-containing protein
Tb927.7.7320:mRNA-p1	Tb927.7.7320:mRNA-p1	hypothetical protein, conserved	6	13.9	80.512	718	718	0.0191017	2.38462	673	2562	1.92859	hypothetical protein, conserved
Tb927.11.4530:mRNA-p1	Tb927.11.4530:mRNA-p1	N-acetyltransferase subunit ARD1	3	21.3	27.484	239	239	0.0191017	2.38451	674	2627	1.9626	N-acetyltransferase subunit ARD1
Tb927.9.7770:mRNA-p1	Tb927.9.7770:mRNA-p1	spermidine synthase	3	14.4	32.926	298	298	0.0191017	2.37731	675	286	-1.23887	spermidine synthase
Tb927.4.4790:mRNA-p1	Tb927.4.4790:mRNA-p1	hypothetical protein, conserved	3	18.4	25.244	228	228	0.0191017	2.37352	676	5275	2.96408	hypothetical protein, conserved
Tb927.11.2600:mRNA-p1	Tb927.11.2600:mRNA-p1	hypothetical protein, conserved	15	22.1	99.524	926	926	0.0191017	2.37193	677	2136	1.65768	hypothetical protein, conserved
Tb927.8.6210:mRNA-p1	Tb927.8.6210:mRNA-p1	phosphatidylinositol 3-kinase, putative	18	23.7	106.22	949	949	0.0191017	2.37042	678	4319	2.67134	phosphatidylinositol 3-kinase, putative
Tb927.6.4250:mRNA-p1	Tb927.6.4250:mRNA-p1	hypothetical protein, conserved	2	8.9	24.919	236	236	0.0191017	2.36554	679	2603	1.93869	hypothetical protein, conserved
Tb927.4.2070:mRNA-p1;Tb11.v5.0410.1-p1;Tb11.v5.0881.1-p1	Tb927.4.2070:mRNA-p1;Tb11.v5.0410.1-p1;Tb11.v5.0881.1-p1	antigenic protein, putative	17;11;9	49.6	511.32	4455	4455;1729;615	0.0191017	2.36379	680	184	-1.88583	antigenic protein, putative
Tb927.8.8020:mRNA-p1	Tb927.8.8020:mRNA-p1	monoglyceride lipase, putative	3	9.2	35.221	314	314	0.0191017	2.36011	681	2955	2.11743	monoglyceride lipase, putative
Tb927.7.6480:mRNA-p1	Tb927.7.6480:mRNA-p1	hypothetical protein, conserved	4	7.5	82.97	760	760	0.0191017	2.3521	682	5429	2.99284	hypothetical protein, conserved
Tb927.6.2880:mRNA-p1	Tb927.6.2880:mRNA-p1	kinesin, putative	29	31.2	122.12	1085	1085	0.0191017	2.34981	683	2111	1.62797	kinesin, putative
Tb927.1.2570:mRNA-p1	Tb927.1.2570:mRNA-p1	coatomer beta subunit	43	51.5	110.05	982	982	0.0191017	2.34899	684	673	-0.0233898	coatomer beta subunit
Tb927.7.5310:mRNA-p1	Tb927.7.5310:mRNA-p1	YEATS family, putative	5	8.9	72.641	662	662	0.0191017	2.34127	685	4056	2.56588	YEATS family, putative
Tb927.3.3670:mRNA-p1	Tb927.3.3670:mRNA-p1	Triple RNA binding domain protein 3	12	23.8	66.931	623	623	0.0191017	2.34045	686	2347	1.77454	Triple RNA binding domain protein 3
Tb927.1.720:mRNA-p1	Tb927.1.720:mRNA-p1	phosphoglycerate kinase	7	19.3	55.747	509	509	0.0191017	2.33898	687	1964	1.51541	phosphoglycerate kinase
Tb927.11.10200:mRNA-p1	Tb927.11.10200:mRNA-p1	hypothetical protein, conserved	4	10.4	53.432	490	490	0.0191017	2.33181	688	1403	1.02803	hypothetical protein, conserved
Tb927.9.13470:mRNA-p1	Tb927.9.13470:mRNA-p1	hypothetical protein, conserved	5	5.8	85.828	780	780	0.0191017	2.33059	689	4135	2.58531	hypothetical protein, conserved
Tb927.1.2770:mRNA-p1	Tb927.1.2770:mRNA-p1	hypothetical protein, conserved	4	16.1	45.913	403	403	0.0191017	2.32262	690	6384	3.20979	hypothetical protein, conserved
Tb927.5.390:mRNA-p1;Tb11.v5.0228.1-p1	Tb927.5.390:mRNA-p1;Tb11.v5.0228.1-p1	75 kDa invariant surface glycoprotein, putative	5;5	9.4	57.736	522	522;523	0.0191017	2.31665	691	1501	1.11917	75 kDa invariant surface glycoprotein, putative
Tb927.5.3600.1:mRNA-p1;Tb927.5.3600.2:mRNA-p1	Tb927.5.3600.1:mRNA-p1;Tb927.5.3600.2:mRNA-p1	ATP-dependent DEAD/H RNA helicase, putative	7;7	9.6	90.212	820	820;948	0.0191017	2.315	692	2869	2.0517	ATP-dependent DEAD/H RNA helicase, putative
Tb927.9.1400:mRNA-p1	Tb927.9.1400:mRNA-p1	kynurenine 3-monooxygenase, putative	3	12.5	51.432	456	456	0.0191017	2.31411	693	6163	3.15271	kynurenine 3-monooxygenase, putative
Tb927.10.9830:mRNA-p1	Tb927.10.9830:mRNA-p1	Mitochondrial ATP synthase subunit, putative	3	26.8	17.194	157	157	0.0191017	2.31119	694	2006	1.53131	Mitochondrial ATP synthase subunit, putative
Tb11.v5.0849.1-p1	Tb11.v5.0849.1-p1	kinesin motor domain containing protein, putative	3	4.4	88.312	803	803	0.0191017	2.29517	695	7149	3.36266	kinesin motor domain containing protein, putative
Tb927.6.2460:mRNA-p1	Tb927.6.2460:mRNA-p1	ubiquitin fusion degradation protein 2, putative	28	33.1	112.63	999	999	0.0191017	2.28972	696	1691	1.28072	ubiquitin fusion degradation protein 2, putative
Tb927.8.3470:mRNA-p1	Tb927.8.3470:mRNA-p1	Vesicle transport v-SNARE protein N-terminus, putative	3	14.1	26.369	234	234	0.0191017	2.28589	697	1864	1.41917	Vesicle transport v-SNARE protein N-terminus, putative
Tb927.3.3790:mRNA-p1;Tb927.3.3770:mRNA-p1;Tb11.v5.0741.1-p1	Tb927.3.3790:mRNA-p1;Tb927.3.3770:mRNA-p1;Tb11.v5.0741.1-p1	hypothetical protein, conserved	10;10;10	56.6	31.661	286	286;286;286	0.0191017	2.28418	698	513	-0.444268	hypothetical protein, conserved
Tb927.7.5530:mRNA-p1	Tb927.7.5530:mRNA-p1	hypothetical protein, conserved	6	17.9	42.241	380	380	0.0191017	2.28207	699	2860	2.03265	hypothetical protein, conserved
Tb927.7.6470:mRNA-p1	Tb927.7.6470:mRNA-p1	metallo-peptidase, Clan MK, Family M67	5	21.2	40.215	372	372	0.0191017	2.2761	700	3727	2.41259	metallo-peptidase, Clan MK, Family M67
Tb11.01.2730.1-p1	Tb11.01.2730.1-p1	hypothetical protein, conserved	29	28.4	311.9	2823	2823	0.0191017	2.27577	701	2152	1.61819	hypothetical protein, conserved
Tb927.8.4940:mRNA-p1	Tb927.8.4940:mRNA-p1	hypothetical protein, conserved	3	8	61.058	550	550	0.0191017	2.27444	702	3712	2.40265	hypothetical protein, conserved
Tb927.11.2640:mRNA-p1	Tb927.11.2640:mRNA-p1	Nucleolar protein 53	10	24.9	53.387	486	486	0.0191017	2.27379	703	3704	2.39749	Nucleolar protein 53
Tb927.11.10780:mRNA-p1	Tb927.11.10780:mRNA-p1	Voltage-dependent anion channel, putative	14	57.3	30.902	279	279	0.0191017	2.26415	704	1967	1.48235	Voltage-dependent anion channel, putative
Tb927.11.11860:mRNA-p1	Tb927.11.11860:mRNA-p1	leucine-rich repeat protein (LRRP), putative	6	11.8	77.501	697	697	0.0191017	2.25847	705	2883	2.03188	leucine-rich repeat protein (LRRP), putative
Tb927.5.950:mRNA-p1	Tb927.5.950:mRNA-p1	monothiol glutaredoxin, putative	9	33.3	24.515	222	222	0.0191017	2.25793	706	1440	1.02833	monothiol glutaredoxin, putative
Tb927.7.5500:mRNA-p1	Tb927.7.5500:mRNA-p1	hypothetical protein, conserved	14	14.6	131.56	1178	1178	0.0191017	2.25663	707	7076	3.32315	hypothetical protein, conserved
Tb927.2.1330:pseudogenic_transcript-p1	Tb927.2.1330:pseudogenic_transcript-p1	retrotransposon hot spot protein 6 (RHS6), degenerate	3	6.1	65.638	602	602	0.0191017	2.25606	708	2208	1.64092	retrotransposon hot spot protein 6 (RHS6), degenerate
Tb927.1.2670:mRNA-p1	Tb927.1.2670:mRNA-p1	paralyzed flagella 16	5	15	56.126	513	513	0.0191017	2.25434	709	477	-0.571796	paralyzed flagella 16
Tb927.7.1220:mRNA-p1	Tb927.7.1220:mRNA-p1	hypothetical protein, conserved	18	20.9	117.94	1074	1074	0.0191017	2.25008	710	3645	2.36003	hypothetical protein, conserved
Tb927.4.3020:mRNA-p1;Tb11.v5.0965.1-p1	Tb927.4.3020:mRNA-p1;Tb11.v5.0965.1-p1	ATP-dependent DEAH-box RNA helicase, putative	5;5	3.9	159.21	1440	1440;1440	0.0191017	2.24439	711	5612	2.98059	ATP-dependent DEAH-box RNA helicase, putative
Tb927.10.5030:mRNA-p1;Tb927.7.3680:mRNA-p1	Tb927.10.5030:mRNA-p1;Tb927.7.3680:mRNA-p1	ubiquitin/ribosomal protein S27a, putative	5;5	27.2	16.705	151	151;153	0.0191017	2.24165	712	816	0.196692	ubiquitin/ribosomal protein S27a, putative
Tb927.4.3810:mRNA-p1	Tb927.4.3810:mRNA-p1	DNA-directed RNA polymerase II subunit 2, putative	42	42	134.59	1190	1190	0.0191017	2.23775	713	1079	0.597721	DNA-directed RNA polymerase II subunit 2, putative
Tb927.3.2050:mRNA-p1	Tb927.3.2050:mRNA-p1	Minicircle replication factor 172	68	46.9	172.41	1572	1572	0.0191017	2.23508	714	1997	1.48384	Minicircle replication factor 172
Tb927.9.4190:mRNA-p1	Tb927.9.4190:mRNA-p1	fatty acyl CoA syntetase 1	21	34.5	78.959	698	698	0.0191017	2.22809	715	838	0.229007	fatty acyl CoA syntetase 1
Tb927.10.8930:mRNA-p1	Tb927.10.8930:mRNA-p1	paraflagellar rod component, putative	5	9.2	80.014	710	710	0.0191017	2.2104	716	825	0.204435	paraflagellar rod component, putative
Tb927.7.660:mRNA-p1	Tb927.7.660:mRNA-p1	Cupin-like domain containing protein, putative	2	4.7	52.795	466	466	0.0191017	2.21033	717	3638	2.3431	Cupin-like domain containing protein, putative
Tb927.2.5030:mRNA-p1	Tb927.2.5030:mRNA-p1	transcription elongation factor SPT5, putative	6	11.7	79.801	715	715	0.0191017	2.20889	718	2180	1.60227	transcription elongation factor SPT5, putative
Tb927.9.7540:mRNA-p1	Tb927.9.7540:mRNA-p1	cysteine peptidase, Clan CA, family C2, putative	15	23	95.448	856	856	0.0191017	2.20655	719	2108	1.55181	cysteine peptidase, Clan CA, family C2, putative
Tb927.4.840:mRNA-p1	Tb927.4.840:mRNA-p1	Histidine kinase-, DNA gyrase B-, and HSP90-like ATPase, putative	4	10.9	45.618	412	412	0.0191017	2.20305	720	4161	2.53086	Histidine kinase-, DNA gyrase B-, and HSP90-like ATPase, putative
Tb927.8.6360:mRNA-p1	Tb927.8.6360:mRNA-p1	SPRY domain containing protein, putative	26	41.3	97.741	899	899	0.0191017	2.1946	721	3585	2.3139	SPRY domain containing protein, putative
Tb927.9.9780:mRNA-p1	Tb927.9.9780:mRNA-p1	peptidyl-prolyl cis-trans isomerase (cyclophilin- 40), putative	6	17.5	38.095	354	354	0.0191017	2.18679	722	722	0	peptidyl-prolyl cis-trans isomerase (cyclophilin- 40), putative
Tb927.6.950:mRNA-p1	Tb927.6.950:mRNA-p1	cysteinyl-tRNA synthetase, putative	22	27.8	89.376	785	785	0.0191017	2.18233	723	675	-0.0991081	cysteinyl-tRNA synthetase, putative
Tb927.10.5670:mRNA-p1	Tb927.10.5670:mRNA-p1	N-acetyltransferase subunit Nat1, putative	27	36.6	82.189	711	711	0.0190291	2.17896	724	967	0.417526	N-acetyltransferase subunit Nat1, putative
Tb927.7.5290:mRNA-p1	Tb927.7.5290:mRNA-p1	hypothetical protein, conserved	5	7.2	81.281	746	746	0.0190291	2.17861	725	3106	2.099	hypothetical protein, conserved
Tb927.11.7590:mRNA-p1;Tb11.v5.0801.1-p1	Tb927.11.7590:mRNA-p1	hypothetical protein, conserved	18;1	20	110.17	974	974;91	0.0190291	2.17823	726	5221	2.84628	hypothetical protein, conserved
Tb927.4.4320:mRNA-p1	Tb927.4.4320:mRNA-p1	divalent cation tolerance protein, putative	3	38.8	12.973	116	116	0.0190291	2.17561	727	3387	2.21998	divalent cation tolerance protein, putative
Tb927.6.2360:mRNA-p1;Tb927.6.2300:mRNA-p1	Tb927.6.2360:mRNA-p1;Tb927.6.2300:mRNA-p1	adenosine kinase, putative	15;14	50.4	37.958	345	345;345	0.0190291	2.17118	728	381	-0.934147	adenosine kinase, putative
Tb927.1.2580:mRNA-p1	Tb927.1.2580:mRNA-p1	exosome-associated protein 1	6	20.2	42.635	397	397	0.0190291	2.17057	729	3090	2.08362	exosome-associated protein 1
Tb927.4.870:mRNA-p1	Tb927.4.870:mRNA-p1	dynein heavy chain, putative	36	8.4	527.12	4599	4599	0.0190291	2.16246	730	603	-0.275738	dynein heavy chain, putative
Tb927.10.3970:mRNA-p1	Tb927.10.3970:mRNA-p1	hypothetical protein, conserved	3	10.5	55.386	516	516	0.0190291	2.16208	731	3179	2.12063	hypothetical protein, conserved
Tb927.3.2470:mRNA-p1	Tb927.3.2470:mRNA-p1	Pumilio homology domain family member 8	13	26.2	69.055	604	604	0.0190291	2.15671	732	2681	1.87286	Pumilio homology domain family member 8
Tb927.3.1210:mRNA-p1	Tb927.3.1210:mRNA-p1	protein transport protein Sec24	29	34.2	108.19	973	973	0.0190291	2.15557	733	1924	1.39222	protein transport protein Sec24
Tb927.5.4400:mRNA-p1;Tb05.5K5.50:mRNA-p1	Tb927.5.4400:mRNA-p1;Tb05.5K5.50:mRNA-p1	hypothetical protein, conserved	2;2	9	47.23	432	432;432	0.0190291	2.15471	734	2291	1.64213	hypothetical protein, conserved
Tb05.5K5.110:mRNA-p1;Tb927.5.4460:mRNA-p1;Tb11.v5.0866.1-p1	Tb05.5K5.110:mRNA-p1;Tb927.5.4460:mRNA-p1;Tb11.v5.0866.1-p1	major vault protein, putative	97;97;55	81.9	94.06	838	838;838;519	0.0190291	2.15327	735	618	-0.250137	major vault protein, putative
Tb927.3.2150:mRNA-p1	Tb927.3.2150:mRNA-p1	protein phosphatase 2C, putative	4	15.2	40.009	362	362	0.0190291	2.1528	736	4128	2.48767	protein phosphatase 2C, putative
Tb927.9.4210:mRNA-p1;Tb11.v5.0561.1-p1	Tb927.9.4210:mRNA-p1;Tb11.v5.0561.1-p1	fatty acyl CoA synthetase 3	3;2	6	77.853	702	702;403	0.0190291	2.15275	737	244	-1.59478	fatty acyl CoA synthetase 3
Tb927.10.13320:mRNA-p1	Tb927.10.13320:mRNA-p1	DNA-directed RNA polymerase II/III subunit, putative	5	37.4	25.21	219	219	0.0190291	2.1522	738	2430	1.71926	DNA-directed RNA polymerase II/III subunit, putative
Tb927.11.9550:mRNA-p1	Tb927.11.9550:mRNA-p1	replication factor C, subunit 4, putative	21	68	37.586	341	341	0.0190291	2.15156	739	2137	1.53194	replication factor C, subunit 4, putative
Tb927.1.2750:mRNA-p1	Tb927.1.2750:mRNA-p1	hypothetical protein, conserved	8	52.4	18.698	168	168	0.0190291	2.15044	740	635	-0.220769	hypothetical protein, conserved
Tb927.10.4200:mRNA-p1	Tb927.10.4200:mRNA-p1	hypothetical protein, conserved	42	43.2	99.871	864	864	0.0190291	2.14957	741	4893	2.72317	hypothetical protein, conserved
Tb927.11.1750:mRNA-p1	Tb927.11.1750:mRNA-p1	hypothetical protein, conserved	10	35.5	34.911	327	327	0.0190291	2.14193	742	3072	2.04969	hypothetical protein, conserved
Tb927.10.14950:mRNA-p1	Tb927.10.14950:mRNA-p1	Zinc finger CCCH domain-containing protein 40	21	71.1	46.194	432	432	0.0190291	2.14041	743	1354	0.865794	Zinc finger CCCH domain-containing protein 40
Tb927.7.3820:mRNA-p1	Tb927.7.3820:mRNA-p1	hypothetical protein, conserved	9	17	71.793	696	696	0.0190291	2.13831	744	2346	1.65683	hypothetical protein, conserved
Tb927.6.2710:mRNA-p1	Tb927.6.2710:mRNA-p1	hypothetical protein, conserved	11	18.3	85.616	761	761	0.0190291	2.13757	745	3176	2.0919	hypothetical protein, conserved
Tb927.3.3900:mRNA-p1	Tb927.3.3900:mRNA-p1	carnitine O-palmitoyltransferase II, putative	23	46.2	67.395	621	621	0.0190291	2.12782	746	1272	0.769851	carnitine O-palmitoyltransferase II, putative
Tb927.7.800:mRNA-p1	Tb927.7.800:mRNA-p1	mitochondrial RNA binding complex 1 subunit	4	7.4	60.484	543	543	0.0190291	2.12151	747	4721	2.65991	mitochondrial RNA binding complex 1 subunit
Tb927.1.4180:mRNA-p1	Tb927.1.4180:mRNA-p1	leucine-rich repeat protein (LRRP), putative	3	5.2	81.988	744	744	0.0190291	2.12011	748	1806	1.27169	leucine-rich repeat protein (LRRP), putative
Tb927.6.1770:mRNA-p1	Tb927.6.1770:mRNA-p1	kinesin, putative	18	37.7	69.409	628	628	0.0190291	2.11944	749	801	0.0968365	kinesin, putative
Tb927.7.6640:mRNA-p1	Tb927.7.6640:mRNA-p1	hypothetical protein, conserved	7	5.9	172.49	1617	1617	0.0190291	2.11535	750	1467	0.967906	hypothetical protein, conserved
Tb927.7.3830:mRNA-p1;Tb11.v5.0493.1-p1	Tb927.7.3830:mRNA-p1;Tb11.v5.0493.1-p1	kinesin K39, putative	66;52	81.9	206.48	1803	1803;1343	0.0190291	2.11479	751	4084	2.4431	kinesin K39, putative
Tb927.11.14210:mRNA-p1	Tb927.11.14210:mRNA-p1	conserved protein	5	3.8	160.13	1456	1456	0.0190291	2.1098	752	1429	0.926201	conserved protein
Tb927.11.3030:mRNA-p1	Tb927.11.3030:mRNA-p1	phosphoribosylpyrophosphate synthetase, putative	13	51.7	39.402	356	356	0.0190291	2.10259	753	992	0.39769	phosphoribosylpyrophosphate synthetase, putative
Tb927.3.5340:mRNA-p1	Tb927.3.5340:mRNA-p1	Hsc70-interacting protein (Hip), putative	11	32.8	42.028	384	384	0.0190291	2.10001	754	812	0.106915	Hsc70-interacting protein (Hip), putative
Tb927.7.4100:mRNA-p1	Tb927.7.4100:mRNA-p1	Domain of unknown function (DUF4201), putative	4	9.2	56.72	500	500	0.0174484	2.08249	755	2162	1.51782	Domain of unknown function (DUF4201), putative
Tb927.2.3480:mRNA-p1	Tb927.2.3480:mRNA-p1	transcription elongation factor s-II, putative	7	26.2	42.597	381	381	0.0174484	2.08197	756	3542	2.22811	transcription elongation factor s-II, putative
Tb927.9.1600:mRNA-p1	Tb927.9.1600:mRNA-p1	hypothetical protein, conserved	22	20.4	182.2	1605	1605	0.0172947	2.0768	757	1593	1.07338	hypothetical protein, conserved
Tb927.10.11260:mRNA-p1	Tb927.10.11260:mRNA-p1	SSU ribosomal protein, mitochondrial, putative	7	44.9	22.384	187	187	0.0172947	2.07671	758	6905	3.18737	SSU ribosomal protein, mitochondrial, putative
Tb927.11.15450:mRNA-p1	Tb927.11.15450:mRNA-p1	Basal body protein	61	81.5	269.62	2293	2293	0.0164865	2.06755	759	4114	2.43837	Basal body protein
Tb927.10.11400:mRNA-p1	Tb927.10.11400:mRNA-p1	WD domain, G-beta repeat, putative	3	10.3	52.726	505	505	0.0164865	2.06536	760	3045	2.00237	WD domain, G-beta repeat, putative
Tb927.6.4270:mRNA-p1	Tb927.6.4270:mRNA-p1	hypothetical protein, conserved	6	43.2	27.15	236	236	0.0164053	2.06204	761	6921	3.18501	hypothetical protein, conserved
Tb927.9.2390:mRNA-p1	Tb927.9.2390:mRNA-p1	hypothetical protein, conserved	3	17.2	22.31	198	198	0.0164053	2.0611	762	3640	2.25608	hypothetical protein, conserved
Tb927.3.4260:mRNA-p1	Tb927.3.4260:mRNA-p1	Acetyl-CoA hydrolase	14	50.3	41.306	368	368	0.0164053	2.05727	763	3593	2.23543	Acetyl-CoA hydrolase
Tb927.11.11010:mRNA-p1	Tb927.11.11010:mRNA-p1	hypothetical protein, conserved	25	64.4	41.653	348	348	0.0164053	2.05714	764	353	-1.1139	hypothetical protein, conserved
Tb927.11.1210:mRNA-p1	Tb927.11.1210:mRNA-p1	Domain of unknown function (DUF4470)/Domain of unknown function (DUF4471), putative	9	20.1	64.79	563	563	0.0164053	2.05656	765	3203	2.06589	Domain of unknown function (DUF4470)/Domain of unknown function (DUF4471), putative
Tb927.11.5650:mRNA-p1	Tb927.11.5650:mRNA-p1	replication factor C, subunit 1, putative	23	54.9	65.046	587	587	0.0164053	2.05643	766	2063	1.42933	replication factor C, subunit 1, putative
Tb927.9.15490:mRNA-p1	Tb927.9.15490:mRNA-p1	ADP-ribosylation factor GTPase activating protein, putative	5	16.7	45.724	413	413	0.0164053	2.05601	767	1865	1.28188	ADP-ribosylation factor GTPase activating protein, putative
Tb927.7.7300:mRNA-p1	Tb927.7.7300:mRNA-p1	ATP-dependent DEAD/H RNA helicase, putative	8	10.1	108.79	1016	1016	0.0164053	2.05324	768	3009	1.97011	ATP-dependent DEAD/H RNA helicase, putative
Tb927.7.1610:mRNA-p1	Tb927.7.1610:mRNA-p1	6-phosphofructo-2-kinase/fructose-2,6-biphosphatase, putative	4	9	72.906	653	653	0.0164053	2.05169	769	6076	2.98207	6-phosphofructo-2-kinase/fructose-2,6-biphosphatase, putative
Tb927.10.3090:mRNA-p1	Tb927.10.3090:mRNA-p1	hypothetical protein, conserved	2	3	94.961	833	833	0.0164053	2.04912	770	3186	2.04882	hypothetical protein, conserved
Tb927.11.5500:mRNA-p1	Tb927.11.5500:mRNA-p1	Mitochondrial SSU ribosomal protein, putative	13	16.1	94.96	812	812	0.0164053	2.04594	771	5178	2.74759	Mitochondrial SSU ribosomal protein, putative
Tb927.9.3460:mRNA-p1	Tb927.9.3460:mRNA-p1	zinc finger protein family member, putative	9	13.7	87.94	796	796	0.0164053	2.04475	772	5748	2.89639	zinc finger protein family member, putative
Tb927.11.13860:mRNA-p1	Tb927.11.13860:mRNA-p1	hypothetical protein, conserved	2	14	29.725	265	265	0.0164053	2.04252	773	3776	2.28832	hypothetical protein, conserved
Tb927.8.4840:mRNA-p1	Tb927.8.4840:mRNA-p1	kinesin, putative	15	17.1	112.38	1014	1014	0.0164053	2.03958	774	5307	2.77749	kinesin, putative
Tb927.10.3030:mRNA-p1;Tb927.10.2980:mRNA-p1	Tb927.10.3030:mRNA-p1;Tb927.10.2980:mRNA-p1	proteasome regulatory non-ATPase subunit 11	24;24	74.8	33.847	305	305;305	0.0164053	2.03739	775	952	0.296765	proteasome regulatory non-ATPase subunit 11
Tb927.6.1830:mRNA-p1	Tb927.6.1830:mRNA-p1	Cleavage stimulation factor subunit 50, putative	15	46.2	49.927	442	442	0.0164053	2.02416	776	2828	1.86565	Cleavage stimulation factor subunit 50, putative
Tb927.8.5230:mRNA-p1	Tb927.8.5230:mRNA-p1	peptidyl-prolyl cis-trans isomerase, putative	2	17.7	30.645	282	282	0.0164053	2.02272	777	1791	1.20478	peptidyl-prolyl cis-trans isomerase, putative
Tb927.7.4420:mRNA-p1	Tb927.7.4420:mRNA-p1	proteasome alpha 3 subunit, putative	5	20.3	32.154	286	286	0.0156617	2.01306	778	798	0.0366186	proteasome alpha 3 subunit, putative
Tb927.7.240:mRNA-p1;Tb927.7.230:mRNA-p1	Tb927.7.240:mRNA-p1;Tb927.7.230:mRNA-p1	40S ribosomal protein S33, putative	5;5	57.3	11.17	103	103;103	0.0155177	2.00982	779	671	-0.215311	40S ribosomal protein S33, putative
Tb927.10.12970:mRNA-p1	Tb927.10.12970:mRNA-p1	AN1-like zinc finger, putative	2	8.6	33.08	303	303	0.0155177	2.00977	780	3535	2.18016	AN1-like zinc finger, putative
Tb927.11.1070:mRNA-p1	Tb927.11.1070:mRNA-p1	glycosomal transporter (GAT3), putative	44	61.3	75.51	684	684	0.0155177	2.00789	781	2195	1.49083	glycosomal transporter (GAT3), putative
Tb927.4.5040:mRNA-p1	Tb927.4.5040:mRNA-p1	dihydrolipoamide dehydrogenase	9	18.4	63.448	581	581	0.0155177	2.0045	782	3191	2.02877	dihydrolipoamide dehydrogenase
Tb927.3.1280:mRNA-p1	Tb927.3.1280:mRNA-p1	NPL4 family, putative	2	6.1	45.907	408	408	0.0155177	2.00407	783	2276	1.53942	NPL4 family, putative
Tb927.10.3210:mRNA-p1	Tb927.10.3210:mRNA-p1	delta-1-pyrroline-5-carboxylate dehydrogenase, putative	25	50.4	62.036	561	561	0.0155177	1.99821	784	194	-2.0148	delta-1-pyrroline-5-carboxylate dehydrogenase, putative
Tb927.3.4230:mRNA-p1	Tb927.3.4230:mRNA-p1	serine peptidase, clan SB, family S8-like protein	15	13.2	151.32	1388	1388	0.0155177	1.99686	785	2572	1.71213	serine peptidase, clan SB, family S8-like protein
Tb927.11.5040:mRNA-p1	Tb927.11.5040:mRNA-p1	leucine-rich repeat protein (LRRP), putative	6	18.9	48.562	440	440	0.0155177	1.99612	786	1538	0.968454	leucine-rich repeat protein (LRRP), putative
Tb927.8.3690:mRNA-p1	Tb927.8.3690:mRNA-p1	isocitrate dehydrogenase [NADP], mitochondrial precursor, putative	25	60	48.565	437	437	0.0155177	1.98988	787	1052	0.418699	isocitrate dehydrogenase [NADP], mitochondrial precursor, putative
Tb927.11.16410:mRNA-p1	Tb927.11.16410:mRNA-p1	enolase, putative	4	12.8	55.68	507	507	0.0155177	1.98738	788	3127	1.98851	enolase, putative
Tb927.8.2620:mRNA-p1	Tb927.8.2620:mRNA-p1	SUMO-interacting motif-containing protein	22	32.3	92.699	834	834	0.0155177	1.98488	789	1989	1.33395	SUMO-interacting motif-containing protein
Tb927.7.1600:mRNA-p1	Tb927.7.1600:mRNA-p1	C-1-tetrahydrofolate synthase, cytoplasmic, putative	9	37.2	31.931	298	298	0.0148476	1.97834	790	4162	2.39735	C-1-tetrahydrofolate synthase, cytoplasmic, putative
Tb927.3.3050:mRNA-p1;Tb11.v5.0690.1-p1	Tb927.3.3050:mRNA-p1;Tb11.v5.0690.1-p1	kinetoplast ribosomal PPR-repeat containing protein 20	4;2	4.2	112.04	1011	1011;401	0.0148476	1.97708	791	6978	3.14106	kinetoplast ribosomal PPR-repeat containing protein 20
Tb927.10.9820:mRNA-p1;Tb11.v5.0565.1-p1	Tb927.10.9820:mRNA-p1;Tb11.v5.0565.1-p1	mitochondrial intermediate peptidase	8;6	18.1	76.732	675	675;539	0.0148476	1.97478	792	2796	1.81979	mitochondrial intermediate peptidase
Tb927.10.6240:mRNA-p1	Tb927.10.6240:mRNA-p1	ras-like small GTPase, putative	3	11.7	44.026	403	403	0.0133581	1.96372	793	4568	2.52617	ras-like small GTPase, putative
Tb927.9.12990:mRNA-p1;Tb11.v5.0665.1-p1	Tb927.9.12990:mRNA-p1	hypothetical protein, conserved	9;1	7.6	143.91	1281	1281;368	0.0132238	1.96021	794	1676	1.07781	hypothetical protein, conserved
Tb927.11.8350:mRNA-p1	Tb927.11.8350:mRNA-p1	katanin p60 ATPase containing subunit A, putative	13	30.7	62.457	554	554	0.0132238	1.9597	795	3265	2.03806	katanin p60 ATPase containing subunit A, putative
Tb927.8.2250:mRNA-p1	Tb927.8.2250:mRNA-p1	Fungal tRNA ligase phosphodiesterase domain containing protein, putative	2	4.6	94.039	847	847	0.0130582	1.95465	796	1110	0.479719	Fungal tRNA ligase phosphodiesterase domain containing protein, putative
Tb927.8.610:mRNA-p1	Tb927.8.610:mRNA-p1	hypothetical protein, conserved	21	28.3	96.194	881	881	0.0130582	1.95409	797	1733	1.12062	hypothetical protein, conserved
Tb927.4.4600:mRNA-p1	Tb927.4.4600:mRNA-p1	mitochondrial ribosomal protein l43	8	38.5	31.248	260	260	0.0130582	1.95296	798	5074	2.66866	mitochondrial ribosomal protein l43
Tb927.3.3110:mRNA-p1	Tb927.3.3110:mRNA-p1	Condensin complex subunit 3, putative	15	18.6	118.8	1061	1061	0.0130582	1.94815	799	2799	1.80864	Condensin complex subunit 3, putative
Tb927.5.2100:mRNA-p1	Tb927.5.2100:mRNA-p1	RNA-binding protein, putative	14	42.2	49.665	465	465	0.0119854	1.93945	800	4212	2.39643	RNA-binding protein, putative
Tb927.7.4390:mRNA-p1	Tb927.7.4390:mRNA-p1	threonine synthase, putative	7	13	73.873	675	675	0.0115481	1.93467	801	1659	1.05044	threonine synthase, putative
Tb927.11.12050:mRNA-p1	Tb927.11.12050:mRNA-p1	hypothetical protein, conserved	21	38.5	71.792	621	621	0.0115481	1.93436	802	3583	2.15949	hypothetical protein, conserved
Tb927.4.1760:mRNA-p1	Tb927.4.1760:mRNA-p1	hypothetical protein, conserved	2	22.9	17.442	157	157	0.0115481	1.93196	803	5419	2.75455	hypothetical protein, conserved
Tb927.11.16140:mRNA-p1	Tb927.11.16140:mRNA-p1	DNA replication licensing factor MCM7	10	15	81.263	731	731	0.0115481	1.92972	804	5191	2.69075	DNA replication licensing factor MCM7
Tb927.10.12890:mRNA-p1	Tb927.10.12890:mRNA-p1	bifunctional aminoacyl-tRNA synthetase, putative	38	53.8	80.555	715	715	0.0115481	1.9261	805	492	-0.71033	bifunctional aminoacyl-tRNA synthetase, putative
Tb927.8.2460:mRNA-p1	Tb927.8.2460:mRNA-p1	hypothetical protein, conserved	3	18	30.901	284	284	0.0113786	1.9211	806	2038	1.3383	hypothetical protein, conserved
Tb927.11.6510:mRNA-p1;Tb927.11.6500:mRNA-p1	Tb927.11.6510:mRNA-p1;Tb927.11.6500:mRNA-p1	40S ribosomal protein S21, putative	5;5	30.9	21.118	194	194;196	0.0113786	1.91967	807	1108	0.457317	40S ribosomal protein S21, putative
Tb927.7.4130:mRNA-p1	Tb927.7.4130:mRNA-p1	hypothetical protein, conserved	14	35.9	269.38	2408	2408	0.0113786	1.91959	808	5375	2.73384	hypothetical protein, conserved
Tb927.8.6840:mRNA-p1	Tb927.8.6840:mRNA-p1	mismatch repair protein MLH1	8	10	95.739	887	887	0.0113786	1.91891	809	5082	2.65118	mismatch repair protein MLH1
Tb927.3.4270:mRNA-p1	Tb927.3.4270:mRNA-p1	hypothetical protein, conserved	16	24.6	99.496	916	916	0.0113786	1.91667	810	1730	1.09478	hypothetical protein, conserved
Tb927.3.5240:mRNA-p1	Tb927.3.5240:mRNA-p1	kinetoplast ribosomal PPR-repeat containing protein 8	4	11.2	66.655	581	581	0.0113786	1.91274	811	4802	2.56586	kinetoplast ribosomal PPR-repeat containing protein 8
Tb927.2.2940:mRNA-p1	Tb927.2.2940:mRNA-p1	hypothetical protein, conserved	11	61.5	32.208	299	299	0.0113786	1.91167	812	4111	2.33994	hypothetical protein, conserved
Tb927.9.3630:mRNA-p1;Tb11.v5.0530.1-p1	Tb927.9.3630:mRNA-p1;Tb11.v5.0530.1-p1	BSD domain containing protein, putative	4;3	9.9	61.829	553	553;553	0.0113786	1.91098	813	1751	1.10685	BSD domain containing protein, putative
Tb927.10.2110:mRNA-p1;Tb927.10.2100:mRNA-p1;Tb927.10.2090:mRNA-p1;Tb11.v5.1046.1-p1	Tb927.10.2110:mRNA-p1;Tb927.10.2100:mRNA-p1;Tb927.10.2090:mRNA-p1;Tb11.v5.1046.1-p1	elongation factor 1-alpha	56;56;56;56	86.2	49.105	449	449;449;449;449	0.0113786	1.90823	814	19	-5.42096	elongation factor 1-alpha
Tb927.8.5250:mRNA-p1	Tb927.8.5250:mRNA-p1	delta-coat protein, putative	23	52.7	57.33	531	531	0.0113786	1.90486	815	973	0.25564	delta-coat protein, putative
Tb927.10.15210:mRNA-p1	Tb927.10.15210:mRNA-p1	nuclear cap binding complex subunit CBP30	7	38.1	30.191	270	270	0.0113786	1.89929	816	2984	1.87061	nuclear cap binding complex subunit CBP30
Tb927.9.1780:mRNA-p1	Tb927.9.1780:mRNA-p1	sec1 family transport protein, putative	5	10.8	69.022	627	627	0.0113786	1.89666	817	2369	1.53587	sec1 family transport protein, putative
Tb927.7.2120:mRNA-p1	Tb927.7.2120:mRNA-p1	hypothetical protein, conserved	10	41.2	46.084	415	415	0.0113786	1.89474	818	1459	0.834807	hypothetical protein, conserved
Tb927.7.6790:mRNA-p1	Tb927.7.6790:mRNA-p1	hypothetical protein, conserved	5	12.5	58.772	537	537	0.0113786	1.8936	819	3584	2.12964	hypothetical protein, conserved
Tb927.9.15330:mRNA-p1	Tb927.9.15330:mRNA-p1	U3 small nucleolar RNA-associated protein 6, putative	3	3.8	100.03	897	897	0.0113786	1.89232	820	4654	2.50478	U3 small nucleolar RNA-associated protein 6, putative
Tb927.10.13540:mRNA-p1	Tb927.10.13540:mRNA-p1	RNA-binding protein, putative	8	41.1	40.16	367	367	0.0113786	1.89126	821	3481	2.08405	RNA-binding protein, putative
Tb927.5.3030:mRNA-p1	Tb927.5.3030:mRNA-p1	Intraflagellar transport protein 121	80	63.4	140.63	1260	1260	0.0113786	1.88782	822	891	0.116287	Intraflagellar transport protein 121
Tb927.3.2190:mRNA-p1	Tb927.3.2190:mRNA-p1	Capping enzyme RNA triphosphatase 1	5	24.5	29.326	253	253	0.0113786	1.88596	823	2818	1.77571	Capping enzyme RNA triphosphatase 1
Tb927.6.2860:mRNA-p1	Tb927.6.2860:mRNA-p1	WD domain, G-beta repeat, putative	13	30.8	48.966	455	455	0.0113786	1.88173	824	1152	0.483424	WD domain, G-beta repeat, putative
Tb927.11.2610:mRNA-p1	Tb927.11.2610:mRNA-p1	hypothetical protein, conserved	33	70.5	50.887	461	461	0.0113786	1.88151	825	130	-2.66588	hypothetical protein, conserved
Tb927.4.4490:mRNA-p1	Tb927.4.4490:mRNA-p1	multidrug resistance protein E	34	21.5	193.8	1759	1759	0.0113786	1.87962	826	1131	0.453385	multidrug resistance protein E
Tb927.10.8180:mRNA-p1	Tb927.10.8180:mRNA-p1	hypothetical protein, conserved	4	5.3	128.52	1203	1203	0.0113786	1.87947	827	3719	2.16896	hypothetical protein, conserved
Tb927.10.13450:mRNA-p1	Tb927.10.13450:mRNA-p1	hypothetical protein, conserved	2	5.5	67.206	600	600	0.0113786	1.87503	828	2061	1.31564	hypothetical protein, conserved
Tb927.11.4450:mRNA-p1	Tb927.11.4450:mRNA-p1	ALBA-Domain Protein	9	68.4	12.757	117	117	0.0113786	1.87408	829	399	-1.05498	ALBA-Domain Protein
Tb927.5.3010:mRNA-p1;Tb11.v5.0691.1-p1	Tb927.5.3010:mRNA-p1;Tb11.v5.0691.1-p1	MRB1 complex subunit MRB3010	4;2	8.3	57.748	516	516;352	0.0113786	1.87379	830	3062	1.88329	MRB1 complex subunit MRB3010
Tb927.11.8410:mRNA-p1	Tb927.11.8410:mRNA-p1	hypothetical protein, conserved	5	8.3	78.051	678	678	0.0113786	1.87046	831	4119	2.30937	hypothetical protein, conserved
Tb927.11.9710:mRNA-p1;Tb927.10.13500:mRNA-p1	Tb927.11.9710:mRNA-p1;Tb927.10.13500:mRNA-p1	60S ribosomal protein L10a, putative	26;26	73.4	24.597	214	214;214	0.0113786	1.86323	832	329	-1.3385	60S ribosomal protein L10a, putative
Tb927.3.1590:mRNA-p1	Tb927.3.1590:mRNA-p1	mitochondrial RNA binding complex 1 subunit	34	60	72.678	668	668	0.0113786	1.86286	833	870	0.0626989	mitochondrial RNA binding complex 1 subunit
Tb927.1.4420:mRNA-p1	Tb927.1.4420:mRNA-p1	ABC transporter, putative	8	11.1	104.68	945	945	0.0113786	1.86144	834	3826	2.19772	ABC transporter, putative
Tb927.7.5180:mRNA-p1;Tb927.7.5170:mRNA-p1	Tb927.7.5180:mRNA-p1;Tb927.7.5170:mRNA-p1	60S ribosomal protein L23a, putative	16;16	65.9	18.17	164	164;164	0.0113786	1.86085	835	373	-1.1626	60S ribosomal protein L23a, putative
Tb927.8.5490:mRNA-p1	Tb927.8.5490:mRNA-p1	Nucleolar protein,Nop52, putative	4	9.1	71.722	623	623	0.0113786	1.85621	836	3086	1.88416	Nucleolar protein,Nop52, putative
Tb927.5.2530:mRNA-p1	Tb927.5.2530:mRNA-p1	RNA cytidine acetyltransferase	29	36.2	114.91	1039	1039	0.0113786	1.8547	837	1797	1.10229	RNA cytidine acetyltransferase
Tb927.3.3150:mRNA-p1	Tb927.3.3150:mRNA-p1	hypothetical protein, conserved	3	5.6	87.471	785	785	0.0113786	1.85418	838	2698	1.68687	hypothetical protein, conserved
Tb927.11.14430:mRNA-p1	Tb927.11.14430:mRNA-p1	proteasome regulatory non-ATP-ase subunit	10	41.6	31.281	274	274	0.0113786	1.85175	839	1505	0.843021	proteasome regulatory non-ATP-ase subunit
Tb927.3.1740:mRNA-p1	Tb927.3.1740:mRNA-p1	hypothetical protein, conserved	8	12.3	76.97	683	683	0.0113786	1.85167	840	1687	1.006	hypothetical protein, conserved
Tb927.9.13280:mRNA-p1	Tb927.9.13280:mRNA-p1	Double RNA binding domain protein 9	6	18.4	47.47	429	429	0.0113786	1.85153	841	3684	2.1311	Double RNA binding domain protein 9
Tb927.6.3090:mRNA-p1	Tb927.6.3090:mRNA-p1	microtubule associated protein xmap215	11	6.8	179.07	1621	1621	0.0113786	1.85024	842	1656	0.975811	microtubule associated protein xmap215
Tb927.10.3540:mRNA-p1	Tb927.10.3540:mRNA-p1	hypothetical protein, conserved	4	20.4	24.291	226	226	0.0113786	1.84867	843	2454	1.54153	hypothetical protein, conserved
Tb927.6.930:mRNA-p1;Tb927.6.940:mRNA-p1	Tb927.6.930:mRNA-p1;Tb927.6.940:mRNA-p1	metacaspase MCA3	6;5	29.1	38.738	357	357;347	0.0113786	1.84622	844	1578	0.902782	metacaspase MCA3
Tb927.11.3870:mRNA-p1	Tb927.11.3870:mRNA-p1	katanin, putative	4	9.7	61.578	567	567	0.0113786	1.84269	845	1699	1.00766	katanin, putative
Tb927.7.5410:mRNA-p1;Tb927.7.5430:mRNA-p1	Tb927.7.5410:mRNA-p1;Tb927.7.5430:mRNA-p1	hypothetical protein, conserved	13;12	16	98.859	906	906;906	0.0113786	1.84189	846	3906	2.20696	hypothetical protein, conserved
Tb927.8.2390:mRNA-p1	Tb927.8.2390:mRNA-p1	hypothetical protein, conserved	35	28.2	163.24	1465	1465	0.0113786	1.83919	847	4909	2.535	hypothetical protein, conserved
Tb927.10.170:mRNA-p1	Tb927.10.170:mRNA-p1	pseudouridine synthase, Cbf5p	12	34.2	48.285	427	427	0.0113786	1.83777	848	1060	0.321928	pseudouridine synthase, Cbf5p
Tb927.10.14790:mRNA-p1	Tb927.10.14790:mRNA-p1	metallo-peptidase, Clan MG, Family M24	8	21.5	42.69	382	382	0.0113786	1.83714	849	605	-0.488829	metallo-peptidase, Clan MG, Family M24
Tb927.11.1110.1-p1	Tb927.11.1110.1-p1	calpain, putative	3	2.6	171.46	1520	1520	0.0113786	1.83586	850	1890	1.15285	calpain, putative
Tb927.11.6910:mRNA-p1	Tb927.11.6910:mRNA-p1	hypothetical protein, conserved	2	2.9	100.11	916	916	0.0113786	1.83231	851	6079	2.8366	hypothetical protein, conserved
Tb927.6.5010:mRNA-p1	Tb927.6.5010:mRNA-p1	hypothetical protein, conserved	12	39.6	40.797	384	384	0.0113786	1.83092	852	1709	1.00423	hypothetical protein, conserved
Tb927.9.11830:mRNA-p1	Tb927.9.11830:mRNA-p1	hypothetical protein, conserved	7	16.2	71.506	653	653	0.0113786	1.83072	853	6167	2.85395	hypothetical protein, conserved
Tb927.6.3020:mRNA-p1	Tb927.6.3020:mRNA-p1	hypothetical protein, conserved	2	9.7	32.217	288	288	0.0113786	1.83048	854	3103	1.86136	hypothetical protein, conserved
Tb927.8.3820:mRNA-p1	Tb927.8.3820:mRNA-p1	conserved protein, unknown function	3	21.8	34.81	339	339	0.0113786	1.82603	855	3397	1.99026	conserved protein, unknown function
Tb927.11.2620:mRNA-p1	Tb927.11.2620:mRNA-p1	hypothetical protein, conserved	3	5.8	68.718	621	621	0.0113786	1.82462	856	4123	2.26801	hypothetical protein, conserved
Tb927.9.5150:mRNA-p1	Tb927.9.5150:mRNA-p1	ribosomal protein S6, putative	5	46.8	13.572	126	126	0.0113786	1.82404	857	651	-0.396638	ribosomal protein S6, putative
Tb927.11.11725:mRNA-p1;Tb927.11.11475:mRNA-p1	Tb927.11.11725:mRNA-p1;Tb927.11.11475:mRNA-p1	ribosomal protein S14p/S29e	6;6	66.7	6.7299	57	57;57	0.0113786	1.82069	858	578	-0.569908	ribosomal protein S14p/S29e
Tb927.8.2210:mRNA-p1	Tb927.8.2210:mRNA-p1	pteridine reductase 1	6	40.3	28.47	268	268	0.0113786	1.81807	859	2249	1.38855	pteridine reductase 1
Tb927.11.7510:mRNA-p1;Tb927.11.7460:mRNA-p1	Tb927.11.7510:mRNA-p1;Tb927.11.7460:mRNA-p1	luminal binding protein 1 (BiP), putative	66;66	71.2	71.434	653	653;653	0.0113786	1.81682	860	43	-4.32193	luminal binding protein 1 (BiP), putative
Tb927.10.11520:mRNA-p1	Tb927.10.11520:mRNA-p1	mitochondrial import inner membrane translocase subunit tim13	4	36.8	13.421	117	117	0.0113786	1.81619	861	3283	1.93093	mitochondrial import inner membrane translocase subunit tim13
Tb927.10.5450:mRNA-p1	Tb927.10.5450:mRNA-p1	ISWI complex protein	19	21.5	107.29	957	957	0.0113786	1.80962	862	1437	0.7373	ISWI complex protein
Tb927.9.6040:mRNA-p1	Tb927.9.6040:mRNA-p1	E1-like ubiquitin-activating enzyme, putative	2	9.8	42.021	387	387	0.0113786	1.80742	863	2879	1.73814	E1-like ubiquitin-activating enzyme, putative
Tb927.8.1600.1:mRNA-p1;Tb927.8.1600.2:mRNA-p1	Tb927.8.1600.1:mRNA-p1;Tb927.8.1600.2:mRNA-p1	lysyl-tRNA synthetase, putative	17;16	29.3	66.786	584	584;660	0.0113786	1.80529	864	6221	2.84804	lysyl-tRNA synthetase, putative
Tb927.11.10540:mRNA-p1	Tb927.11.10540:mRNA-p1	hypothetical protein, conserved	14	20.8	99.443	855	855	0.0113786	1.79742	865	630	-0.457348	hypothetical protein, conserved
Tb927.1.3070:mRNA-p1	Tb927.1.3070:mRNA-p1	hypothetical protein, conserved	24	70.2	44.99	413	413	0.0113786	1.79698	866	3100	1.83983	hypothetical protein, conserved
Tb927.8.7510:mRNA-p1	Tb927.8.7510:mRNA-p1	p-nitrophenylphosphatase, putative	3	12.1	41.687	389	389	0.0113786	1.79563	867	2873	1.72845	p-nitrophenylphosphatase, putative
Tb927.6.4540:mRNA-p1	Tb927.6.4540:mRNA-p1	3-hydroxy-3-methylglutaryl-CoA reductase, putative	13	33.9	45.944	434	434	0.0113786	1.79434	868	3260	1.90911	3-hydroxy-3-methylglutaryl-CoA reductase, putative
Tb927.8.1945:mRNA-p1	Tb927.8.1945:mRNA-p1	hypothetical protein	5	35.2	16.349	145	145	0.0113786	1.79098	869	2692	1.63125	hypothetical protein
Tb927.10.2870:mRNA-p1;Tb11.v5.0790.1-p1	Tb927.10.2870:mRNA-p1	hypothetical protein, conserved	7;1	11.1	88.996	829	829;356	0.0113786	1.79059	870	7149	3.03865	hypothetical protein, conserved
Tb927.11.7240:mRNA-p1;Tb11.v5.0258.1-p1	Tb927.11.7240:mRNA-p1;Tb11.v5.0258.1-p1	nexin-dynein regulatory complex 2	5;5	9.7	58.672	507	507;507	0.0113786	1.7849	871	1678	0.945998	nexin-dynein regulatory complex 2
Tb927.3.1370:mRNA-p1;Tb927.10.2840:mRNA-p1	Tb927.3.1370:mRNA-p1;Tb927.10.2840:mRNA-p1	40S ribosomal protein S25, putative	11;11	50.4	12.56	113	113;113	0.0113786	1.7848	872	479	-0.864302	40S ribosomal protein S25, putative
Tb927.11.4230:mRNA-p1	Tb927.11.4230:mRNA-p1	hypothetical protein, conserved	11	12.4	132.43	1201	1201	0.0113786	1.78256	873	3225	1.88525	hypothetical protein, conserved
Tb927.11.11480:mRNA-p1	Tb927.11.11480:mRNA-p1	Trichohyalin, putative	21	33.6	78.966	658	658	0.0113786	1.77617	874	2544	1.54139	Trichohyalin, putative
Tb927.8.2000:mRNA-p1	Tb927.8.2000:mRNA-p1	cyclophilin, putative	6	30.5	28.482	262	262	0.0113786	1.77133	875	1213	0.471225	cyclophilin, putative
Tb927.10.13720:mRNA-p1	Tb927.10.13720:mRNA-p1	RNA-binding protein 29, putative	13	30	40.678	377	377	0.0112761	1.76287	876	851	-0.0417717	RNA-binding protein 29, putative
Tb927.4.5120:mRNA-p1	Tb927.4.5120:mRNA-p1	hypothetical protein, conserved	22	29.6	155.28	1378	1378	0.0112761	1.76166	877	4075	2.21615	hypothetical protein, conserved
Tb927.5.820:mRNA-p1	Tb927.5.820:mRNA-p1	hypothetical protein, conserved	2	7.8	36.947	344	344	0.011187	1.75853	878	5157	2.55424	hypothetical protein, conserved
Tb927.5.1200:mRNA-p1	Tb927.5.1200:mRNA-p1	exosome complex component CSL4	4	20.4	32.566	309	309	0.0111246	1.75621	879	4041	2.20078	exosome complex component CSL4
Tb927.4.2110:mRNA-p1	Tb927.4.2110:mRNA-p1	protein phosphatase 2C, putative	8	33.4	33.456	314	314	0.0111246	1.75535	880	1387	0.656392	protein phosphatase 2C, putative
Tb927.1.1370:mRNA-p1;Tb11.v5.0391.1-p1	Tb927.1.1370:mRNA-p1;Tb11.v5.0391.1-p1	rRNA biogenesis protein, putative	7;7	10.5	75.103	679	679;679	0.0111246	1.75484	881	3088	1.80946	rRNA biogenesis protein, putative
Tb927.11.5520:mRNA-p1	Tb927.11.5520:mRNA-p1	triosephosphate isomerase	7	40.4	26.819	250	250	0.0111246	1.75308	882	137	-2.6866	triosephosphate isomerase
Tb927.10.15660:mRNA-p1	Tb927.10.15660:mRNA-p1	hypothetical protein, conserved	42	56.7	85.608	779	779	0.0111246	1.75152	883	1789	1.01867	hypothetical protein, conserved
Tb927.3.2960:mRNA-p1	Tb927.3.2960:mRNA-p1	inosine-adenosine-guanosine-nucleosidehydrolase	8	30.3	35.848	327	327	0.0111246	1.75097	884	260	-1.76553	inosine-adenosine-guanosine-nucleosidehydrolase
Tb927.9.9860:mRNA-p1	Tb927.9.9860:mRNA-p1	170 kDa glucose-regulated protein, putative	17	28.1	79.857	720	720	0.0111246	1.75025	885	441	-1.0049	170 kDa glucose-regulated protein, putative
Tb927.11.2300:mRNA-p1	Tb927.11.2300:mRNA-p1	eukaryotic peptide chain release factor subunit 1, putative	26	53.1	50.976	452	452	0.0111246	1.74707	886	895	0.014581	eukaryotic peptide chain release factor subunit 1, putative
Tb927.2.6000:mRNA-p1	Tb927.2.6000:mRNA-p1	glycosylphosphatidylinositol-specific phospholipase C	11	45.3	40.662	358	358	0.0111246	1.74703	887	715	-0.310991	glycosylphosphatidylinositol-specific phospholipase C
Tb927.8.3970:mRNA-p1	Tb927.8.3970:mRNA-p1	oxidoreductase, putative	4	11.8	45.637	433	433	0.0111246	1.74461	888	2682	1.59468	oxidoreductase, putative
Tb927.11.14950:mRNA-p1	Tb927.11.14950:mRNA-p1	zinc finger protein 2	4	37.4	15.767	139	139	0.0111246	1.74264	889	1195	0.426755	zinc finger protein 2
Tb927.10.8120.2:mRNA-p1;Tb927.10.8120.1:mRNA-p1	Tb927.10.8120.2:mRNA-p1;Tb927.10.8120.1:mRNA-p1	RNA ligase/AAA domain containing protein, putative	2;2	3.3	87.721	780	780;870	0.0111246	1.73936	890	7149	3.00586	RNA ligase/AAA domain containing protein, putative
Tb927.1.1530:mRNA-p1;Tb11.v5.0534.1-p1	Tb927.1.1530:mRNA-p1	STE group serine/threonine-protein kinase, putative	24;6	16.7	191.48	1742	1742;615	0.0111246	1.73864	891	2811	1.65759	STE group serine/threonine-protein kinase, putative
Tb927.9.8780:mRNA-p1	Tb927.9.8780:mRNA-p1	tRNA nucleotidyltransferase, putative	11	28.3	58.645	526	526	0.0111246	1.73449	892	3279	1.87814	tRNA nucleotidyltransferase, putative
Tb927.10.14770:mRNA-p1	Tb927.10.14770:mRNA-p1	Associated kinase of Tb14-3-3	9	18.6	70.531	640	640	0.0111246	1.73314	893	953	0.093816	Associated kinase of Tb14-3-3
Tb927.9.6130:mRNA-p1	Tb927.9.6130:mRNA-p1	calmodulin, putative	2	17.8	17.842	157	157	0.0111246	1.73214	894	996	0.155871	calmodulin, putative
Tb927.7.3030:mRNA-p1;Tb927.7.2990:mRNA-p1	Tb927.7.3030:mRNA-p1;Tb927.7.2990:mRNA-p1	hypothetical protein, conserved	5;5	22.3	35.572	309	309;309	0.0111246	1.72881	895	5747	2.68285	hypothetical protein, conserved
Tb927.10.1090:mRNA-p1;Tb927.10.1080:mRNA-p1	Tb927.10.1090:mRNA-p1;Tb927.10.1080:mRNA-p1	40S ribosomal protein S23, putative	13;13	65	15.928	143	143;143	0.0111246	1.72774	896	653	-0.456416	40S ribosomal protein S23, putative
Tb927.10.9770:mRNA-p1;Tb11.v5.0848.1-p1	Tb927.10.9770:mRNA-p1;Tb11.v5.0848.1-p1	gamma-tubulin complex component 2	8;4	15.4	87.083	784	784;452	0.0111246	1.72677	897	3861	2.10579	gamma-tubulin complex component 2
Tb927.6.1460.1:mRNA-p1;Tb927.6.1460.2:mRNA-p1	Tb927.6.1460.1:mRNA-p1;Tb927.6.1460.2:mRNA-p1	cyclin 3	3;3	10.9	46.523	414	414;451	0.0111246	1.72446	898	3675	2.03296	cyclin 3
Tb927.10.13800:mRNA-p1	Tb927.10.13800:mRNA-p1	hypothetical protein, conserved	29	58	46.281	431	431	0.0111246	1.72185	899	1400	0.639034	hypothetical protein, conserved
Tb927.5.3240:mRNA-p1	Tb927.5.3240:mRNA-p1	hypothetical protein, conserved	18	28.1	88.633	797	797	0.0111246	1.71993	900	2898	1.68706	hypothetical protein, conserved
Tb927.5.2440:mRNA-p1	Tb927.5.2440:mRNA-p1	Centrosomal protein of 164 kDa, putative	7	7.4	130.96	1177	1177	0.0111246	1.71814	901	5203	2.52974	Centrosomal protein of 164 kDa, putative
Tb927.10.2890:mRNA-p1;Tb11.v5.0650.1-p1	Tb927.10.2890:mRNA-p1;Tb11.v5.0650.1-p1	enolase	46;46	88.8	46.592	429	429;429	0.0111246	1.71761	902	21	-5.42467	enolase
Tb927.7.3700:mRNA-p1	Tb927.7.3700:mRNA-p1	hypothetical protein, conserved	13	51.1	33.765	305	305	0.0111246	1.71292	903	2209	1.2906	hypothetical protein, conserved
Tb927.7.5150:mRNA-p1	Tb927.7.5150:mRNA-p1	hypothetical protein, conserved	6	5.2	158.06	1454	1454	0.0111246	1.71269	904	3739	2.04826	hypothetical protein, conserved
Tb927.7.6260:mRNA-p1	Tb927.7.6260:mRNA-p1	TPR repeat, putative	3	11.8	36.454	322	322	0.0111246	1.70757	905	1366	0.593968	TPR repeat, putative
Tb927.10.15160:mRNA-p1	Tb927.10.15160:mRNA-p1	hypothetical protein, conserved	7	11.9	97.38	877	877	0.0111246	1.70415	906	4760	2.39338	hypothetical protein, conserved
Tb927.2.6090:mRNA-p1;Tb927.11.3230:mRNA-p1	Tb927.2.6090:mRNA-p1;Tb927.11.3230:mRNA-p1	60S ribosomal protein L44	13;13	59.4	12.454	106	106;106	0.0111246	1.70178	907	862	-0.0734147	60S ribosomal protein L44
Tb927.9.5020:mRNA-p1	Tb927.9.5020:mRNA-p1	HMG-box domain containing protein, putative	6	18.7	44.431	385	385	0.0111246	1.69617	908	4201	2.20997	HMG-box domain containing protein, putative
Tb927.2.4110:mRNA-p1	Tb927.2.4110:mRNA-p1	Mitochondrial-processing peptidase subunit alpha	11	31.3	52.064	469	469	0.0111246	1.69564	909	1788	0.975995	Mitochondrial-processing peptidase subunit alpha
Tb927.10.13270:mRNA-p1;Tb11.v5.0563.1-p1	Tb927.10.13270:mRNA-p1;Tb11.v5.0563.1-p1	Periodic tryptophan protein 2 homolog, putative	6;6	7.7	102.91	939	939;939	0.0111246	1.69484	910	3746	2.04141	Periodic tryptophan protein 2 homolog, putative
Tb927.4.1220:mRNA-p1	Tb927.4.1220:mRNA-p1	leucine-rich repeat protein (LRRP), putative	2	8.5	28.975	260	260	0.0111246	1.69374	911	2022	1.15026	leucine-rich repeat protein (LRRP), putative
Tb927.3.4360:mRNA-p1;Tb927.11.6140:mRNA-p1	Tb927.3.4360:mRNA-p1;Tb927.11.6140:mRNA-p1	40S ribosomal protein S15A, putative	11;11	74.6	14.645	130	130;130	0.0111246	1.69051	912	531	-0.780322	40S ribosomal protein S15A, putative
Tb927.3.3270:mRNA-p1	Tb927.3.3270:mRNA-p1	ATP-dependent 6-phosphofructokinase, glycosomal	48	68.8	53.517	487	487	0.0111246	1.69039	913	41	-4.47692	ATP-dependent 6-phosphofructokinase, glycosomal
Tb927.10.13840:mRNA-p1	Tb927.10.13840:mRNA-p1	Domain of unknown function (DUF4475), putative	4	18.4	37.882	342	342	0.0111246	1.68325	914	2657	1.53953	Domain of unknown function (DUF4475), putative
Tb927.10.12130:mRNA-p1	Tb927.10.12130:mRNA-p1	Ubiquitin family, putative	3	6	87.529	783	783	0.0111246	1.6828	915	2771	1.59856	Ubiquitin family, putative
Tb927.5.2420:mRNA-p1	Tb927.5.2420:mRNA-p1	NOL1/NOP2/sun family, putative	11	16.5	102.77	935	935	0.0111246	1.68205	916	6801	2.89233	NOL1/NOP2/sun family, putative
Tb927.10.15440:mRNA-p1	Tb927.10.15440:mRNA-p1	hypothetical protein, conserved	2	10.2	32.727	285	285	0.0111246	1.68205	917	1981	1.11124	hypothetical protein, conserved
Tb927.10.2440:mRNA-p1	Tb927.10.2440:mRNA-p1	Metacaspase-4	8	32.6	38.969	353	353	0.0111246	1.67838	918	385	-1.25364	Metacaspase-4
Tb927.5.1130:mRNA-p1	Tb927.5.1130:mRNA-p1	hypothetical protein, conserved	2	8.3	34.299	312	312	0.0111246	1.67612	919	5609	2.60961	hypothetical protein, conserved
Tb927.11.870:mRNA-p1	Tb927.11.870:mRNA-p1	mitochondrial ribosomal protein l23	3	14.2	28.776	246	246	0.0111246	1.67206	920	5175	2.49185	mitochondrial ribosomal protein l23
Tb927.2.1120:pseudogenic_transcript-p1;Tb11.0820:pseudogenic_transcript-p1;Tb11.v5.0295.1-p1	Tb927.2.1120:pseudogenic_transcript-p1;Tb11.0820:pseudogenic_transcript-p1;Tb11.v5.0295.1-p1	retrotransposon hot spot protein 4 (RHS4), point mutation	2;1;1	3.8	80.856	711	711;803;409	0.0111246	1.66958	921	4202	2.1898	retrotransposon hot spot protein 4 (RHS4), point mutation
Tb927.11.12070:mRNA-p1	Tb927.11.12070:mRNA-p1	hypothetical protein, conserved	8	38.5	33.377	291	291	0.0111246	1.66948	922	5294	2.52152	hypothetical protein, conserved
Tb927.10.16110:mRNA-p1;Tb11.v5.0527.1-p1	Tb927.10.16110:mRNA-p1;Tb11.v5.0527.1-p1	component of motile flagella 1	15;15	51.8	42.99	386	386;386	0.0111246	1.66862	923	1280	0.471741	component of motile flagella 1
Tb927.7.2700:mRNA-p1	Tb927.7.2700:mRNA-p1	NADH-cytochrome b5 reductase, putative	11	47.7	31.856	287	287	0.0111246	1.66752	924	1623	0.812698	NADH-cytochrome b5 reductase, putative
Tb927.4.2700:mRNA-p1	Tb927.4.2700:mRNA-p1	Hydroxymethylglutaryl-CoA lyase, mitochondrial, putative	6	15.3	47.272	431	431	0.0111246	1.66244	925	1934	1.06406	Hydroxymethylglutaryl-CoA lyase, mitochondrial, putative
Tb927.2.5760:mRNA-p1	Tb927.2.5760:mRNA-p1	Flagellar Member 8	33	23.7	330.07	3075	3075	0.0111246	1.66047	926	1171	0.338657	Flagellar Member 8
Tb927.7.2940:mRNA-p1;Tb927.7.2930:mRNA-p1;Tb927.7.2920:mRNA-p1;Tb927.7.2910:mRNA-p1;Tb927.7.2900:mRNA-p1;Tb927.7.2890:mRNA-p1;Tb927.7.2880:mRNA-p1;Tb927.7.2870:mRNA-p1;Tb927.7.2860:mRNA-p1;Tb927.7.2850:mRNA-p1;Tb927.7.2840:mRNA-p1;Tb927.7.2830:mRNA-p1;Tb927.7.2820:mRNA-p1	Tb927.7.2940:mRNA-p1;Tb927.7.2930:mRNA-p1;Tb927.7.2920:mRNA-p1;Tb927.7.2910:mRNA-p1;Tb927.7.2900:mRNA-p1;Tb927.7.2890:mRNA-p1;Tb927.7.2880:mRNA-p1;Tb927.7.2870:mRNA-p1;Tb927.7.2860:mRNA-p1;Tb927.7.2850:mRNA-p1;Tb927.7.2840:mRNA-p1;Tb927.7.2830:mRNA-p1;Tb927.7.2820:mRNA-p1	histone H2A, putative	5;5;5;5;5;5;5;5;5;5;5;5;5	26.1	14.212	134	134;134;134;134;134;134;134;134;134;134;134;134;134	0.0110355	1.65747	927	126	-2.87915	histone H2A, putative
Tb927.10.7610:mRNA-p1	Tb927.10.7610:mRNA-p1	NADH-ubiquinone oxidoreductase complex I subunit, putative	45	34.4	165.1	1432	1432	0.0102121	1.65269	928	3247	1.80691	NADH-ubiquinone oxidoreductase complex I subunit, putative
Tb927.11.14070:mRNA-p1	Tb927.11.14070:mRNA-p1	Repressor of differentiation kinase 1	3	2.4	131.03	1195	1195	0.0102121	1.65203	929	6407	2.7859	Repressor of differentiation kinase 1
Tb927.7.4150:mRNA-p1	Tb927.7.4150:mRNA-p1	hypothetical protein, conserved	4	3.4	138.37	1251	1251	0.0102121	1.65195	930	3197	1.78142	hypothetical protein, conserved
Tb927.8.3950:mRNA-p1	Tb927.8.3950:mRNA-p1	hypothetical protein, conserved	2	2.3	102.13	914	914	0.0102121	1.65174	931	1858	0.996897	hypothetical protein, conserved
Tb927.4.2920:mRNA-p1	Tb927.4.2920:mRNA-p1	hypothetical protein, conserved	4	4.1	107.59	966	966	0.0102121	1.64924	932	1825	0.969495	hypothetical protein, conserved
Tb927.10.6680:mRNA-p1	Tb927.10.6680:mRNA-p1	member of the NOL1/NOP2/sun family of proteins	7	10.7	82.376	740	740	0.0102121	1.64835	933	3159	1.75952	member of the NOL1/NOP2/sun family of proteins
Tb927.11.12750:mRNA-p1;Tb11.v5.0291.1-p1	Tb927.11.12750:mRNA-p1;Tb11.v5.0291.1-p1	cleavage and polyadenylation specificity factor 30 kDa subunit	8;8	39.7	31.603	277	277;277	0.0102121	1.64198	934	2763	1.56474	cleavage and polyadenylation specificity factor 30 kDa subunit
Tb927.10.3150:mRNA-p1	Tb927.10.3150:mRNA-p1	N-acetyltransferase, putative	6	27.3	23.621	205	205	0.00986546	1.63788	935	2090	1.16046	N-acetyltransferase, putative
Tb927.3.3560:mRNA-p1	Tb927.3.3560:mRNA-p1	U-box domain containing protein, putative	28	51.4	69.087	624	624	0.00986546	1.63627	936	361	-1.37451	U-box domain containing protein, putative
Tb927.10.9700:mRNA-p1;Tb11.v5.0773.1-p1	Tb927.10.9700:mRNA-p1	Flagellum attachment zone protein 22	22;10	20.4	132.58	1181	1181;419	0.00973664	1.63365	937	1536	0.713057	Flagellum attachment zone protein 22
Tb927.2.2530:mRNA-p1	Tb927.2.2530:mRNA-p1	hypothetical protein, conserved	38	60.9	80.471	770	770	0.00973664	1.63261	938	4091	2.12479	hypothetical protein, conserved
Tb927.11.10370:mRNA-p1	Tb927.11.10370:mRNA-p1	glycosyl hydrolase-like protein	10	14.6	118.83	1055	1055	0.00973664	1.6316	939	3132	1.73789	glycosyl hydrolase-like protein
Tb927.10.15170:mRNA-p1	Tb927.10.15170:mRNA-p1	hypothetical protein, conserved	10	20.6	77.347	695	695	0.00973664	1.62979	940	2840	1.59516	hypothetical protein, conserved
Tb927.11.3650:mRNA-p1;Tb11.v5.0435.1-p1	Tb927.11.3650:mRNA-p1;Tb11.v5.0435.1-p1	adenylosuccinate synthetase, putative	22;22	42	66.674	602	602;602	0.00841069	1.62015	941	191	-2.30062	adenylosuccinate synthetase, putative
Tb927.2.3370:mRNA-p1	Tb927.2.3370:mRNA-p1	UDP-Gal or UDP-GlcNAc-dependent glycosyltransferase, putative	4	14.9	43.687	377	377	0.00841069	1.6201	942	2679	1.5079	UDP-Gal or UDP-GlcNAc-dependent glycosyltransferase, putative
Tb927.11.13070:mRNA-p1	Tb927.11.13070:mRNA-p1	O-phosphoseryl-tRNA(Sec) selenium transferase, putative	2	4	58.964	545	545	0.00762324	1.61252	943	5306	2.49229	O-phosphoseryl-tRNA(Sec) selenium transferase, putative
Tb927.3.1300:mRNA-p1	Tb927.3.1300:mRNA-p1	hypothetical protein, conserved	10	30.2	46.085	410	410	0.00757904	1.61077	944	2017	1.09535	hypothetical protein, conserved
Tb927.8.1870:mRNA-p1	Tb927.8.1870:mRNA-p1	Golgi/lysosome glycoprotein 1	20	38.8	67.597	616	616	0.00757904	1.60945	945	204	-2.21175	Golgi/lysosome glycoprotein 1
Tb927.7.7410:mRNA-p1	Tb927.7.7410:mRNA-p1	Trans-2-enoyl-ACP reductase 2, putative	15	54.9	35.787	335	335	0.00757904	1.60809	946	1898	1.00457	Trans-2-enoyl-ACP reductase 2, putative
Tb927.10.6880:mRNA-p1;Tb11.v5.0516.1-p1	Tb927.10.6880:mRNA-p1;Tb11.v5.0516.1-p1	glyceraldehyde 3-phosphate dehydrogenase, cytosolic	6;6	22.7	35.61	331	331;331	0.00757904	1.60747	947	281	-1.75279	glyceraldehyde 3-phosphate dehydrogenase, cytosolic
Tb927.4.1660:mRNA-p1	Tb927.4.1660:mRNA-p1	mitochondrial carrier protein, putative	5	21.8	42.163	385	385	0.00757904	1.60744	948	2919	1.62252	mitochondrial carrier protein, putative
Tb927.11.14190:mRNA-p1	Tb927.11.14190:mRNA-p1	Staphylococcal nuclease homologue/Tudor domain containing protein, putative	19	22.5	100.47	924	924	0.00757904	1.60727	949	458	-1.05106	Staphylococcal nuclease homologue/Tudor domain containing protein, putative
Tb927.10.8040:mRNA-p1	Tb927.10.8040:mRNA-p1	beta adaptin, putative	28	42.6	76.279	695	695	0.00757904	1.60618	950	753	-0.335278	beta adaptin, putative
Tb927.10.7810:mRNA-p1	Tb927.10.7810:mRNA-p1	Pre-rRNA-processing protein ESF1, putative	12	18.8	80.305	712	712	0.00757904	1.60546	951	2536	1.41504	Pre-rRNA-processing protein ESF1, putative
Tb927.8.6720:mRNA-p1;Tb927.8.6710:mRNA-p1	Tb927.8.6720:mRNA-p1	hypothetical protein, conserved	5;1	9.6	67.713	615	615;594	0.00757904	1.60408	952	2623	1.46218	hypothetical protein, conserved
Tb927.11.6130:mRNA-p1	Tb927.11.6130:mRNA-p1	SKP1-like protein	6	41.8	21.125	182	182	0.00757904	1.59766	953	1419	0.574326	SKP1-like protein
Tb927.10.6510:mRNA-p1;Tb927.10.6400:mRNA-p1	Tb927.10.6510:mRNA-p1;Tb927.10.6400:mRNA-p1	chaperonin HSP60, mitochondrial precursor	56;56	87.2	59.503	562	562;562	0.00757904	1.59756	954	49	-4.28314	chaperonin HSP60, mitochondrial precursor
Tb927.1.4050:mRNA-p1	Tb927.1.4050:mRNA-p1	ser/thr protein phosphatase, putative	19	22.8	105.75	925	925	0.00757904	1.59507	955	1476	0.62812	ser/thr protein phosphatase, putative
Tb927.8.7800:mRNA-p1	Tb927.8.7800:mRNA-p1	hypothetical protein, conserved	5	7.1	131.61	1200	1200	0.00757904	1.58893	956	3961	2.05078	hypothetical protein, conserved
Tb927.9.9410:mRNA-p1;Tb927.9.9390:mRNA-p1;Tb927.9.9380:mRNA-p1	Tb927.9.9410:mRNA-p1;Tb927.9.9390:mRNA-p1;Tb927.9.9380:mRNA-p1	inositol phosphorylceramide synthase	2;1;1	8.6	37.964	337	337;329;347	0.00757904	1.5878	957	3335	1.8011	inositol phosphorylceramide synthase
Tb927.11.16400:mRNA-p1	Tb927.11.16400:mRNA-p1	kinetoplast-associated protein 3, putative	15	38.6	36.609	324	324	0.0072698	1.58306	958	1670	0.801751	kinetoplast-associated protein 3, putative
Tb927.4.3310:mRNA-p1	Tb927.4.3310:mRNA-p1	TPR repeat/SET domain containing protein, putative	18	31.2	73.886	673	673	0.0070667	1.58032	959	2710	1.49869	TPR repeat/SET domain containing protein, putative
Tb927.11.8200:mRNA-p1	Tb927.11.8200:mRNA-p1	ribosomal protein S26, putative	9	66.7	12.806	111	111	0.0070667	1.58001	960	649	-0.564816	ribosomal protein S26, putative
Tb927.4.3980.1:mRNA-p1;Tb927.4.3980.2:mRNA-p1	Tb927.4.3980.1:mRNA-p1;Tb927.4.3980.2:mRNA-p1	chaperone protein DnaJ, putative	3;3	9.9	53.62	486	486;495	0.0070667	1.57784	961	4696	2.28882	chaperone protein DnaJ, putative
Tb927.11.5190:mRNA-p1	Tb927.11.5190:mRNA-p1	leucine-rich repeat protein (LRRP), putative	47	35.5	168.29	1498	1498	0.00660786	1.5735	962	2053	1.09362	leucine-rich repeat protein (LRRP), putative
Tb927.7.5680:mRNA-p1	Tb927.7.5680:mRNA-p1	deoxyribose-phosphate aldolase, putative	11	49.6	30.037	280	280	0.00660786	1.57266	963	2848	1.56434	deoxyribose-phosphate aldolase, putative
Tb927.10.9950:mRNA-p1	Tb927.10.9950:mRNA-p1	hypothetical protein, conserved	3	10.9	44.06	394	394	0.00660786	1.5719	964	4736	2.29656	hypothetical protein, conserved
Tb927.5.3560:mRNA-p1	Tb927.5.3560:mRNA-p1	vesicle-associated membrane protein, putative	4	21.3	24.402	216	216	0.00660786	1.5707	965	1087	0.171751	vesicle-associated membrane protein, putative
Tb927.10.14930:mRNA-p1	Tb927.10.14930:mRNA-p1	Zinc finger CCCH domain-containing protein 39	20	54.7	31.519	285	285	0.00660786	1.56772	966	2543	1.39644	Zinc finger CCCH domain-containing protein 39
Tb927.6.3150:mRNA-p1	Tb927.6.3150:mRNA-p1	Hydin	13	3.4	501.13	4521	4521	0.0062244	1.56276	967	924	-0.065623	Hydin
Tb927.2.5980:mRNA-p1	Tb927.2.5980:mRNA-p1	chaperone protein ClpB1, putative	75	69.2	97.037	870	870	0.00566525	1.5593	968	382	-1.34143	chaperone protein ClpB1, putative
Tb927.9.1380:mRNA-p1	Tb927.9.1380:mRNA-p1	hypothetical protein, conserved	10	35.6	42.439	379	379	0.00566525	1.5591	969	1442	0.573503	hypothetical protein, conserved
Tb927.4.4560:mRNA-p1	Tb927.4.4560:mRNA-p1	hypothetical protein, conserved	7	8.5	117.5	1080	1080	0.00566525	1.5587	970	4711	2.27998	hypothetical protein, conserved
Tb927.11.2340:mRNA-p1	Tb927.11.2340:mRNA-p1	hypothetical protein, conserved	8	18.8	58.674	528	528	0.00532658	1.55299	971	2718	1.485	hypothetical protein, conserved
Tb927.2.4240:mRNA-p1	Tb927.2.4240:mRNA-p1	GTP binding protein, putative	6	22.9	40.685	367	367	0.00532658	1.55228	972	6988	2.84585	GTP binding protein, putative
Tb927.4.1020:mRNA-p1	Tb927.4.1020:mRNA-p1	serine-palmitoyl-CoA transferase, putative	10	32.4	54.128	490	490	0.00532658	1.55129	973	1301	0.419109	serine-palmitoyl-CoA transferase, putative
Tb927.5.1790:mRNA-p1	Tb927.5.1790:mRNA-p1	Mitochondrial SSU ribosomal protein, putative	5	9.8	71.956	631	631	0.00532658	1.55121	974	6147	2.65789	Mitochondrial SSU ribosomal protein, putative
Tb927.11.2670:mRNA-p1	Tb927.11.2670:mRNA-p1	Nucleoporin NUP59	5	11.2	58.822	545	545	0.00532658	1.54725	975	1117	0.196155	Nucleoporin NUP59
Tb927.9.13110:mRNA-p1	Tb927.9.13110:mRNA-p1	hypothetical protein, conserved	3	7.1	48.199	439	439	0.00532658	1.54584	976	6464	2.72747	hypothetical protein, conserved
Tb927.6.3820:mRNA-p1	Tb927.6.3820:mRNA-p1	hypothetical protein, conserved	4	6.6	93.659	847	847	0.00532658	1.54478	977	2892	1.56564	hypothetical protein, conserved
Tb927.8.5510:mRNA-p1	Tb927.8.5510:mRNA-p1	apurinic/apyrimidinic endonuclease, putative	4	13.1	44.375	396	396	0.00527383	1.54028	978	1461	0.57905	apurinic/apyrimidinic endonuclease, putative
Tb927.2.3160:mRNA-p1	Tb927.2.3160:mRNA-p1	Gar1/Naf1 RNA binding region, putative	6	24.7	45.916	429	429	0.00460176	1.53591	979	5002	2.35312	Gar1/Naf1 RNA binding region, putative
Tb927.7.700:mRNA-p1	Tb927.7.700:mRNA-p1	Nucleolar protein 74	12	23	74.25	666	666	0.00454909	1.53404	980	1748	0.834852	Nucleolar protein 74
Tb11.v5.0326.1-p1	Tb11.v5.0326.1-p1	retrotransposon hot spot (RHS) protein, putative	4	19.9	34.883	302	302	0.00454909	1.53312	981	3682	1.90816	retrotransposon hot spot (RHS) protein, putative
Tb927.10.12180:mRNA-p1	Tb927.10.12180:mRNA-p1	hypothetical protein, conserved	4	7.4	77.894	702	702	0.00454909	1.53311	982	2216	1.17416	hypothetical protein, conserved
Tb927.11.16530:mRNA-p1	Tb927.11.16530:mRNA-p1	hypothetical protein, conserved	7	11.2	117.5	1068	1068	0.0045447	1.5286	983	6650	2.75809	hypothetical protein, conserved
Tb927.10.7990:mRNA-p1	Tb927.10.7990:mRNA-p1	replication factor C subunit 3, putative	19	61	38.734	349	349	0.00350146	1.52272	984	2417	1.29649	replication factor C subunit 3, putative
Tb927.10.180:mRNA-p1	Tb927.10.180:mRNA-p1	ATP synthase F1 subunit gamma protein, putative	9	31.1	34.37	305	305	0.00282776	1.51813	985	1187	0.269124	ATP synthase F1 subunit gamma protein, putative
Tb927.7.1030:mRNA-p1	Tb927.7.1030:mRNA-p1	heat shock 70 kDa protein, putative	2	3	96.895	870	870	0.00282776	1.51674	986	6346	2.68619	heat shock 70 kDa protein, putative
Tb927.11.2820:mRNA-p1	Tb927.11.2820:mRNA-p1	hypothetical protein, conserved	4	7.6	93.519	874	874	0.00266168	1.514	987	7149	2.85662	hypothetical protein, conserved
Tb927.10.14750:mRNA-p1;Tb927.10.14630:mRNA-p1	Tb927.10.14750:mRNA-p1;Tb927.10.14630:mRNA-p1	fibrillarin, putative	13;12	44.7	31.672	304	304;228	0.00238648	1.51119	988	733	-0.430698	fibrillarin, putative
Tb927.6.3450:mRNA-p1	Tb927.6.3450:mRNA-p1	hypothetical protein, conserved	7	9.3	88.002	813	813	0.00209836	1.50837	989	5183	2.38974	hypothetical protein, conserved
Tb927.2.5020:mRNA-p1	Tb927.2.5020:mRNA-p1	acyl-CoA oxidase, putative	3	5.1	82.398	728	728	0.00209836	1.50827	990	5417	2.45199	acyl-CoA oxidase, putative
Tb927.10.12090:mRNA-p1	Tb927.10.12090:mRNA-p1	RNA-binding protein, putative	4	49.1	13.272	116	116	0.00209836	1.50517	991	2153	1.11939	RNA-binding protein, putative
Tb927.7.6610:mRNA-p1	Tb927.7.6610:mRNA-p1	hypothetical protein, conserved	24	31.9	96.787	897	897	0.00209836	1.50464	992	1497	0.593662	hypothetical protein, conserved
Tb927.9.14220:mRNA-p1	Tb927.9.14220:mRNA-p1	metacaspase 5, putative	9	22	55.442	500	500	0.00209836	1.50442	993	2678	1.43129	metacaspase 5, putative
Tb927.1.1500:mRNA-p1	Tb927.1.1500:mRNA-p1	conserved protein, unknown function	20	31.8	73.618	664	664	0.00209836	1.50296	994	2643	1.41086	conserved protein, unknown function
Tb927.9.7060:mRNA-p1	Tb927.9.7060:mRNA-p1	hypothetical protein, conserved	14	50.2	32.799	297	297	0.00209836	1.5001	995	5471	2.45904	hypothetical protein, conserved
Tb11.v5.0584.1-p1;Tb927.3.3180:mRNA-p1	Tb11.v5.0584.1-p1;Tb927.3.3180:mRNA-p1	hypothetical protein, conserved	5;5	45	61.073	613	613;992	0.00209836	1.49735	996	1099	0.141974	hypothetical protein, conserved
Tb927.4.2240:mRNA-p1	Tb927.4.2240:mRNA-p1	Aminotransferase class IV, putative	11	30.3	44.187	390	390	0.00209836	1.49685	997	1106	0.149686	Aminotransferase class IV, putative
Tb927.10.14500:mRNA-p1	Tb927.10.14500:mRNA-p1	hypothetical protein, conserved	10	42.1	37.027	337	337	0.00209836	1.49539	998	412	-1.2764	hypothetical protein, conserved
Tb927.11.10950:mRNA-p1	Tb927.11.10950:mRNA-p1	DnaJ domain containing protein, putative	5	21.6	36.848	329	329	0.00209836	1.49336	999	5769	2.52976	DnaJ domain containing protein, putative
Tb927.11.4180:mRNA-p1	Tb927.11.4180:mRNA-p1	PSP1 C-terminal conserved region, putative	10	25.2	55.629	507	507	0.00174502	1.48846	1000	3854	1.94636	PSP1 C-terminal conserved region, putative
Tb927.11.16130:mRNA-p1	Tb927.11.16130:mRNA-p1	nucleoside diphosphate kinase	4	31.4	16.857	153	153	0.0013092	1.48484	1001	152	-2.7193	nucleoside diphosphate kinase
Tb927.8.820:mRNA-p1	Tb927.8.820:mRNA-p1	VID27 cytoplasmic protein, putative	14	33.3	61.686	553	553	0.0013092	1.48437	1002	1434	0.517163	VID27 cytoplasmic protein, putative
Tb927.1.4100:mRNA-p1	Tb927.1.4100:mRNA-p1	cytochrome oxidase subunit IV	2	9.3	40.534	353	353	0.00107839	1.48034	1003	6558	2.70893	cytochrome oxidase subunit IV
Tb927.9.15380:mRNA-p1;Tb11.v5.0686.1-p1	Tb927.9.15380:mRNA-p1;Tb11.v5.0686.1-p1	nadh-ubiquinone oxidoreductase 39 kda subunit	7;7	25.2	42.585	373	373;373	0.00107839	1.4799	1004	6470	2.68801	nadh-ubiquinone oxidoreductase 39 kda subunit
Tb927.7.7250:mRNA-p1	Tb927.7.7250:mRNA-p1	Ankyrin repeats (3 copies), putative	24	25.1	142.4	1317	1317	0.00107839	1.47865	1005	1683	0.74384	Ankyrin repeats (3 copies), putative
Tb927.5.520:mRNA-p1	Tb927.5.520:mRNA-p1	stomatin-like protein, putative	16	34.1	55.979	531	531	0.00107839	1.47806	1006	1939	0.946682	stomatin-like protein, putative
Tb927.1.320:pseudogenic_transcript-p1	Tb927.1.320:pseudogenic_transcript-p1	retrotransposon hot spot protein (RHS, pseudogene), putative	2	9.4	27.31	256	256	0.00107839	1.47698	1007	5657	2.48997	retrotransposon hot spot protein (RHS, pseudogene), putative
Tb927.3.2310:mRNA-p1	Tb927.3.2310:mRNA-p1	parkin coregulated gene protein	5	20.7	33.785	300	300	0.00107839	1.47555	1008	979	-0.0421149	parkin coregulated gene protein
Tb927.5.1460:mRNA-p1	Tb927.5.1460:mRNA-p1	Possible lysine decarboxylase, putative	11	35.9	36.762	326	326	0.00107839	1.47516	1009	729	-0.468935	Possible lysine decarboxylase, putative
Tb927.3.2010:mRNA-p1	Tb927.3.2010:mRNA-p1	hypothetical protein, conserved	7	15.9	62.262	554	554	0.00107839	1.47467	1010	4515	2.16037	hypothetical protein, conserved
Tb927.10.4890:mRNA-p1	Tb927.10.4890:mRNA-p1	zinc-finger of a C2HC-type, putative	8	44.2	32.142	301	301	0.00107839	1.46918	1011	3312	1.71192	zinc-finger of a C2HC-type, putative
Tb927.10.10850:mRNA-p1	Tb927.10.10850:mRNA-p1	Protein argonaute-1	65	63	99.184	903	903	0.00107839	1.46692	1012	503	-1.00858	Protein argonaute-1
Tb11.v5.0624.1-p1	Tb11.v5.0624.1-p1	retrotransposon hot spot protein (PHS), putative	2	3.9	62.492	544	544	0.00107839	1.46403	1013	1405	0.471936	retrotransposon hot spot protein (PHS), putative
Tb927.1.4740:mRNA-p1	Tb927.1.4740:mRNA-p1	FAM91 N-terminus/FAM91 C-terminus, putative	10	9.9	116.56	1059	1059	0.00105227	1.46125	1014	3122	1.62241	FAM91 N-terminus/FAM91 C-terminus, putative
Tb927.6.3860:mRNA-p1	Tb927.6.3860:mRNA-p1	leucyl/phenylalanyl-tRNA protein transferase, putative	6	15.6	44.312	391	391	0.00105227	1.46003	1015	2029	0.999289	leucyl/phenylalanyl-tRNA protein transferase, putative
Tb927.10.12510:mRNA-p1	Tb927.10.12510:mRNA-p1	P-type H+-ATPase, putative	12	14.6	100.63	920	920	0.00105227	1.45962	1016	500	-1.0229	P-type H+-ATPase, putative
Tb927.11.8150:mRNA-p1;Tb11.v5.1045.1-p1;Tb11.v5.1048.1-p1	Tb927.11.8150:mRNA-p1	ULK family pseudokinase, putative	14;2;1	13.8	137.8	1253	1253;265;346	0.00105227	1.45927	1017	2105	1.0495	ULK family pseudokinase, putative
Tb927.9.8450:mRNA-p1	Tb927.9.8450:mRNA-p1	UMP/CMP kinase	4	23	22.44	200	200	0.00105227	1.45914	1018	1002	-0.0228551	UMP/CMP kinase
Tb927.10.11690:mRNA-p1	Tb927.10.11690:mRNA-p1	YEATS family, putative	9	30.8	53.584	484	484	0.00105227	1.45705	1019	4003	1.97393	YEATS family, putative
Tb927.3.2230:mRNA-p1	Tb927.3.2230:mRNA-p1	succinyl-CoA synthetase alpha subunit, putative	15	53.8	31.464	301	301	0.00105227	1.45556	1020	455	-1.16463	succinyl-CoA synthetase alpha subunit, putative
Tb927.7.2450:mRNA-p1	Tb927.7.2450:mRNA-p1	SUMO-interacting motif-containing protein	4	11.3	54.394	485	485	0.00105227	1.45163	1021	2785	1.44769	SUMO-interacting motif-containing protein
Tb927.11.2260:mRNA-p1	Tb927.11.2260:mRNA-p1	Eukaryotic translation initiation factor 4E-1	5	28.8	26.024	233	233	0.00105227	1.45116	1022	1527	0.579305	Eukaryotic translation initiation factor 4E-1
Tb927.11.13280:mRNA-p1	Tb927.11.13280:mRNA-p1	mitochondrial RNA binding protein 2	9	49.6	25.106	224	224	0.000569299	1.44465	1023	1028	0.00703412	mitochondrial RNA binding protein 2
Tb927.11.15560:mRNA-p1	Tb927.11.15560:mRNA-p1	Nucleoporin NUP53a	2	6.1	52.786	539	539	0.000569299	1.4444	1024	2554	1.31854	Nucleoporin NUP53a
Tb927.11.7170:mRNA-p1	Tb927.11.7170:mRNA-p1	seryl-tRNA synthetase	8	21.5	53.857	479	479	0.000569299	1.44432	1025	387	-1.40522	seryl-tRNA synthetase
Tb927.7.510:mRNA-p1	Tb927.7.510:mRNA-p1	hypothetical protein, conserved	2	6.7	39.995	356	356	0.000569299	1.44104	1026	2877	1.48753	hypothetical protein, conserved
Tb927.11.11520:mRNA-p1	Tb927.11.11520:mRNA-p1	glycosomal membrane protein	10	35.8	24.027	218	218	-0.000512165	1.43452	1027	472	-1.12158	glycosomal membrane protein
Tb927.2.2120:mRNA-p1	Tb927.2.2120:mRNA-p1	Serine/threonine-protein kinase NEK22, putative	11	31.1	50.602	453	453	-0.00146977	1.42932	1028	1361	0.404827	Serine/threonine-protein kinase NEK22, putative
Tb927.7.5760:mRNA-p1	Tb927.7.5760:mRNA-p1	nuclear transport factor 2 protein, putative	5	37.8	15.812	135	135	-0.00146977	1.42903	1029	1999	0.958035	nuclear transport factor 2 protein, putative
Tb927.8.2860:mRNA-p1	Tb927.8.2860:mRNA-p1	hypothetical protein, conserved	25	31	99.326	898	898	-0.00146977	1.42848	1030	1466	0.509241	hypothetical protein, conserved
Tb927.4.3320:mRNA-p1	Tb927.4.3320:mRNA-p1	uracil phosphoribosyltransferase, putative	3	15.8	27.031	240	240	-0.00146977	1.42761	1031	1305	0.340005	uracil phosphoribosyltransferase, putative
Tb927.11.12440:mRNA-p1	Tb927.11.12440:mRNA-p1	Plus-3 domain/Zinc finger, C3HC4 type (RING finger), putative	7	24.9	43.41	394	394	-0.00146977	1.42743	1032	4328	2.06826	Plus-3 domain/Zinc finger, C3HC4 type (RING finger), putative
Tb927.10.14800:mRNA-p1;Tb11.v5.0626.1-p1	Tb927.10.14800:mRNA-p1;Tb11.v5.0626.1-p1	mitogen-activated protein kinase 9, putative	10;10	28.2	42.749	387	387;387	-0.00146977	1.42664	1033	1869	0.855426	mitogen-activated protein kinase 9, putative
Tb927.8.2050:mRNA-p1	Tb927.8.2050:mRNA-p1	GDP-mannose pyrophosphorylase	12	43.6	40.704	369	369	-0.00146977	1.42539	1034	1287	0.315776	GDP-mannose pyrophosphorylase
Tb927.6.2230:mRNA-p1	Tb927.6.2230:mRNA-p1	RGG protein	41	58.2	88.736	794	794	-0.00146977	1.42363	1035	1292	0.319975	RGG protein
Tb927.11.1430:mRNA-p1	Tb927.11.1430:mRNA-p1	Component of motile flagella 2	17	26.9	86.855	752	752	-0.00146977	1.42334	1036	340	-1.60742	Component of motile flagella 2
Tb927.4.2060:mRNA-p1	Tb927.4.2060:mRNA-p1	Flagellum attachment zone protein 8	24	44.7	66.835	586	586	-0.00146977	1.42222	1037	887	-0.22541	Flagellum attachment zone protein 8
Tb927.10.2290:mRNA-p1	Tb927.10.2290:mRNA-p1	chaperone protein DnaJ, putative	18	62.7	46.795	416	416	-0.00146977	1.42093	1038	1594	0.618845	chaperone protein DnaJ, putative
Tb927.11.11150:mRNA-p1	Tb927.11.11150:mRNA-p1	U5 snRNP-specific 40 kDa protein	7	33.1	35.002	326	326	-0.00146977	1.42066	1039	4189	2.01141	U5 snRNP-specific 40 kDa protein
Tb927.11.4860:mRNA-p1	Tb927.11.4860:mRNA-p1	Ring finger domain containing protein, putative	21	56.9	52.008	466	466	-0.00146977	1.4203	1040	917	-0.18159	Ring finger domain containing protein, putative
Tb927.9.6310:mRNA-p1	Tb927.9.6310:mRNA-p1	ABC transporter, putative	4	10.4	72.215	646	646	-0.00146977	1.41772	1041	2560	1.29817	ABC transporter, putative
Tb927.2.2230:mRNA-p1	Tb927.2.2230:mRNA-p1	hypothetical protein, conserved	7	17.8	42.703	388	388	-0.00146977	1.41427	1042	2011	0.948558	hypothetical protein, conserved
Tb927.10.14480:mRNA-p1	Tb927.10.14480:mRNA-p1	hypothetical protein, conserved	11	16.6	92.815	865	865	-0.00146977	1.41387	1043	4065	1.96252	hypothetical protein, conserved
Tb927.7.1750:mRNA-p1;Tb927.7.1740:mRNA-p1;Tb927.7.1730:mRNA-p1;REV__Tb927.3.3460:mRNA-p1	Tb927.7.1750:mRNA-p1;Tb927.7.1740:mRNA-p1;Tb927.7.1730:mRNA-p1	60S ribosomal protein L7, putative	30;30;30;1	71.9	27.713	242	242;242;242;483	-0.00146977	1.41298	1044	293	-1.83315	60S ribosomal protein L7, putative
Tb927.9.7820:mRNA-p1	Tb927.9.7820:mRNA-p1	hypothetical protein, conserved	8	20.2	82.728	771	771	-0.00146977	1.41036	1045	3001	1.52194	hypothetical protein, conserved
Tb927.10.1550:mRNA-p1	Tb927.10.1550:mRNA-p1	proteasome regulatory non-ATP-ase subunit 5	25	55.8	54.896	482	482	-0.00146977	1.41019	1046	905	-0.208893	proteasome regulatory non-ATP-ase subunit 5
Tb927.7.6900:mRNA-p1	Tb927.7.6900:mRNA-p1	Sister chromatid cohesion protein 1	7	17.1	63.033	584	584	-0.00146977	1.40951	1047	2530	1.27288	Sister chromatid cohesion protein 1
Tb927.9.12300:mRNA-p1	Tb927.9.12300:mRNA-p1	replication factor C, subunit 3, putative	22	71.7	39.624	357	357	-0.00146977	1.40758	1048	1969	0.909824	replication factor C, subunit 3, putative
Tb927.10.210:mRNA-p1	Tb927.10.210:mRNA-p1	GPI transamidase component GAA1	3	8.7	51.313	461	461	-0.00146977	1.40215	1049	2503	1.25464	GPI transamidase component GAA1
Tb927.10.2700:mRNA-p1	Tb927.10.2700:mRNA-p1	predicted WD40 repeat protein	7	16.2	75.239	696	696	-0.00146977	1.40113	1050	2672	1.34753	predicted WD40 repeat protein
Tb927.11.14130:mRNA-p1;Tb927.10.3840:mRNA-p1	Tb927.11.14130:mRNA-p1;Tb927.10.3840:mRNA-p1	ribosomal protein L18, putative	18;18	69.8	20.904	179	179;179	-0.00146977	1.4006	1051	301	-1.80393	ribosomal protein L18, putative
Tb927.3.1620:mRNA-p1	Tb927.3.1620:mRNA-p1	ER-golgi trafficking TRAPP I complex 85 kDa subunit, putative	34	24.9	178.11	1631	1631	-0.00146977	1.39597	1052	3008	1.51567	ER-golgi trafficking TRAPP I complex 85 kDa subunit, putative
Tb927.7.6690:mRNA-p1	Tb927.7.6690:mRNA-p1	Trypanosoma specific protein, unknown function	5	16.4	51.302	488	488	-0.00146977	1.3935	1053	3200	1.60357	Trypanosoma specific protein, unknown function
Tb927.10.14040:mRNA-p1	Tb927.10.14040:mRNA-p1	vacuolar ATP synthase subunit c, putative	16	51.1	43.414	380	380	-0.00172074	1.3875	1054	1284	0.28477	vacuolar ATP synthase subunit c, putative
Tb927.11.2230:mRNA-p1	Tb927.11.2230:mRNA-p1	carnitine O-acetyltransferase, putative	7	9.9	82.426	737	737	-0.00172074	1.38748	1055	1328	0.332012	carnitine O-acetyltransferase, putative
Tb927.11.6260:mRNA-p1	Tb927.11.6260:mRNA-p1	hypothetical protein, conserved	5	7.2	88.339	800	800	-0.00172074	1.38574	1056	6091	2.52807	hypothetical protein, conserved
Tb927.10.7340:mRNA-p1;Tb927.10.7330:mRNA-p1	Tb927.10.7340:mRNA-p1;Tb927.10.7330:mRNA-p1	40S ribosomal protein S24E, putative	10;10	51.8	15.683	137	137;137	-0.00186346	1.38252	1057	402	-1.39471	40S ribosomal protein S24E, putative
Tb927.11.11250:mRNA-p1	Tb927.11.11250:mRNA-p1	cytosolic malate dehydrogenase	5	24.4	35.151	328	328	-0.00198885	1.38036	1058	326	-1.6984	cytosolic malate dehydrogenase
Tb927.9.8720:mRNA-p1	Tb927.9.8720:mRNA-p1	fructose-1,6-bisphosphatase	15	45.7	38.534	350	350	-0.00198885	1.37992	1059	1078	0.0256546	fructose-1,6-bisphosphatase
Tb927.4.3660:mRNA-p1	Tb927.4.3660:mRNA-p1	hypothetical protein, conserved	6	19.8	54.816	481	481	-0.00213149	1.37688	1060	3111	1.55331	hypothetical protein, conserved
Tb927.6.1800:mRNA-p1	Tb927.6.1800:mRNA-p1	protein phosphatase 2C, putative	11	38	41.135	382	382	-0.00213149	1.37648	1061	688	-0.624944	protein phosphatase 2C, putative
Tb927.4.3160:mRNA-p1	Tb927.4.3160:mRNA-p1	dihydroxyacetone phosphate acyltransferase, putative	38	36.5	137.14	1242	1242	-0.00213149	1.37584	1062	2341	1.14034	dihydroxyacetone phosphate acyltransferase, putative
Tb927.10.15680:mRNA-p1	Tb927.10.15680:mRNA-p1	hypothetical protein, conserved	15	14.7	260.9	2399	2399	-0.00213149	1.37499	1063	5043	2.24614	hypothetical protein, conserved
Tb927.9.1350:mRNA-p1	Tb927.9.1350:mRNA-p1	hypothetical protein, conserved	32	60	59.813	537	537	-0.00213149	1.37392	1064	1754	0.721151	hypothetical protein, conserved
Tb927.3.1800:mRNA-p1	Tb927.3.1800:mRNA-p1	hypothetical protein, conserved	28	22.6	161.94	1461	1461	-0.00213149	1.37297	1065	2067	0.956685	hypothetical protein, conserved
Tb927.11.9170:mRNA-p1	Tb927.11.9170:mRNA-p1	DNA topoisomerase III, putative	24	36.9	93.688	841	841	-0.00213149	1.37089	1066	2937	1.46214	DNA topoisomerase III, putative
Tb927.10.4640:mRNA-p1	Tb927.10.4640:mRNA-p1	eukaryotic translation initiation factor 3 subunit l	15	43.6	55.649	488	488	-0.00223952	1.36635	1067	902	-0.242361	eukaryotic translation initiation factor 3 subunit l
Tb927.11.5730:mRNA-p1	Tb927.11.5730:mRNA-p1	pre-mRNA-splicing factor ATP-dependent RNA helicase, putative	9	9.3	116.62	1046	1046	-0.00223952	1.36612	1068	3578	1.74424	pre-mRNA-splicing factor ATP-dependent RNA helicase, putative
Tb927.11.2090:mRNA-p1	Tb927.11.2090:mRNA-p1	choline kinase	6	17.9	49.158	431	431	-0.00223952	1.36568	1069	2230	1.06078	choline kinase
Tb927.11.9890:mRNA-p1	Tb927.11.9890:mRNA-p1	signal recognition particle receptor alpha subunit, putative	12	22.7	63.526	582	582	-0.00223952	1.36506	1070	1038	-0.0438044	signal recognition particle receptor alpha subunit, putative
Tb927.11.15270:mRNA-p1	Tb927.11.15270:mRNA-p1	phosphopantetheine adenylyltransferase, putative	3	23.5	28.843	268	268	-0.00223952	1.36495	1071	2802	1.3875	phosphopantetheine adenylyltransferase, putative
Tb927.5.2000:mRNA-p1	Tb927.5.2000:mRNA-p1	hypothetical protein	11	33.5	38.829	361	361	-0.00223952	1.3632	1072	4281	1.99764	hypothetical protein
Tb927.7.750:mRNA-p1	Tb927.7.750:mRNA-p1	hypothetical protein, conserved	20	29.1	93.019	848	848	-0.00223952	1.36302	1073	4942	2.20344	hypothetical protein, conserved
Tb927.9.3770:mRNA-p1	Tb927.9.3770:mRNA-p1	hypothetical protein, conserved	6	43.6	23.95	220	220	-0.00223952	1.36275	1074	995	-0.110226	hypothetical protein, conserved
Tb927.8.1230:mRNA-p1	Tb927.8.1230:mRNA-p1	hypothetical protein, conserved	2	12.6	19.777	183	183	-0.00223952	1.36192	1075	7149	2.7334	hypothetical protein, conserved
Tb927.3.5030:mRNA-p1	Tb927.3.5030:mRNA-p1	KU70 protein	6	11.1	81.049	745	745	-0.00223952	1.35801	1076	4756	2.14407	KU70 protein
Tb927.11.10900:mRNA-p1	Tb927.11.10900:mRNA-p1	Component of motile flagella 9	15	16.7	99.792	848	848	-0.00223952	1.35714	1077	1988	0.8843	Component of motile flagella 9
Tb927.8.1250:mRNA-p1	Tb927.8.1250:mRNA-p1	Sel1 repeat, putative	3	6.5	89.043	803	803	-0.00223952	1.35115	1078	3128	1.53688	Sel1 repeat, putative
Tb927.8.6800:mRNA-p1	Tb927.8.6800:mRNA-p1	hypothetical protein, conserved	4	10.3	57.207	516	516	-0.00223952	1.34947	1079	4677	2.11589	hypothetical protein, conserved
Tb927.5.3290:mRNA-p1	Tb927.5.3290:mRNA-p1	Protein of unknown function, putative	21	22	130	1189	1189	-0.00223952	1.34926	1080	3579	1.72853	Protein of unknown function, putative
Tb927.4.2030:mRNA-p1	Tb927.4.2030:mRNA-p1	DNA/RNA-binding protein Alba 4	3	17.5	22.704	217	217	-0.00223952	1.3482	1081	314	-1.78353	DNA/RNA-binding protein Alba 4
Tb927.6.4600:mRNA-p1	Tb927.6.4600:mRNA-p1	pre-mRNA splicing factor ATP-dependent RNA helicase, putative	17	22.4	109.07	966	966	-0.00223952	1.34647	1082	4885	2.17466	pre-mRNA splicing factor ATP-dependent RNA helicase, putative
Tb927.7.3950:mRNA-p1	Tb927.7.3950:mRNA-p1	RNA-editing complex protein	15	24.2	107.38	975	975	-0.00223952	1.34259	1083	3207	1.56619	RNA-editing complex protein
Tb927.7.2300:mRNA-p1	Tb927.7.2300:mRNA-p1	Nucleoporin NUP132	26	26.1	132.36	1203	1203	-0.00223952	1.34107	1084	1477	0.446305	Nucleoporin NUP132
Tb927.3.3450:mRNA-p1	Tb927.3.3450:mRNA-p1	ADP-ribosylation factor-like protein 3, putative	13	68.5	19.881	178	178	-0.00223952	1.33981	1085	146	-2.89365	ADP-ribosylation factor-like protein 3, putative
Tb927.4.4570:mRNA-p1	Tb927.4.4570:mRNA-p1	hypothetical protein, conserved	29	36.1	98.496	902	902	-0.00223952	1.33809	1086	2287	1.07443	hypothetical protein, conserved
Tb927.10.2610:mRNA-p1	Tb927.10.2610:mRNA-p1	Domain of unknown function (DUF1935), putative	15	34.5	54.358	484	484	-0.00223952	1.33696	1087	3986	1.87459	Domain of unknown function (DUF1935), putative
Tb927.3.5040:mRNA-p1	Tb927.3.5040:mRNA-p1	hypothetical protein, conserved	26	57.8	61.875	564	564	-0.00223952	1.33685	1088	3443	1.66199	hypothetical protein, conserved
Tb927.11.11730:mRNA-p1	Tb927.11.11730:mRNA-p1	MRP protein, putative	7	31	30.668	284	284	-0.00223952	1.33503	1089	3060	1.49053	MRP protein, putative
Tb927.9.10690:mRNA-p1	Tb927.9.10690:mRNA-p1	Protein of unknown function (DUF2009), putative	14	32.8	55.64	488	488	-0.00223952	1.33471	1090	2167	0.991371	Protein of unknown function (DUF2009), putative
Tb927.11.4470:mRNA-p1	Tb927.11.4470:mRNA-p1	ULK family serine/threonine-protein kinase, putative	12	16	120.66	1089	1089	-0.00223952	1.33424	1091	4138	1.92328	ULK family serine/threonine-protein kinase, putative
Tb927.8.3840:mRNA-p1;Tb10.v4.0212:pseudogenic_transcript-p1;Tb11.v5.0599.1-p1	Tb927.8.3840:mRNA-p1	hypothetical protein, conserved	22;1;1	36.3	80.049	741	741;422;509	-0.00223952	1.33231	1092	1435	0.394078	hypothetical protein, conserved
Tb927.7.330:mRNA-p1	Tb927.7.330:mRNA-p1	Thioesterase-like superfamily, putative	3	18.7	21.139	193	193	-0.00223952	1.33099	1093	5820	2.41273	Thioesterase-like superfamily, putative
Tb927.10.14410:mRNA-p1	Tb927.10.14410:mRNA-p1	leucine-rich repeat protein (LRRP), putative	11	11.5	142.21	1291	1291	-0.00223952	1.33076	1094	6397	2.54778	leucine-rich repeat protein (LRRP), putative
Tb927.3.2100:mRNA-p1	Tb927.3.2100:mRNA-p1	hypothetical protein, conserved	11	42.2	33.996	308	308	-0.00223952	1.3291	1095	667	-0.715172	hypothetical protein, conserved
Tb927.10.10090:mRNA-p1	Tb927.10.10090:mRNA-p1	Component of motile flagella 14	10	13.2	121.48	1086	1086	-0.00223952	1.32822	1096	4277	1.96435	Component of motile flagella 14
Tb927.5.4580:mRNA-p1;Tb05.5K5.220:mRNA-p1;Tb11.v5.0364.1-p1;Tb927.5.4570:mRNA-p1;Tb05.5K5.210:mRNA-p1	Tb927.5.4580:mRNA-p1;Tb05.5K5.220:mRNA-p1;Tb11.v5.0364.1-p1;Tb927.5.4570:mRNA-p1;Tb05.5K5.210:mRNA-p1	Flagellum adhesion protein 3	2;2;2;1;1	2.7	88.633	818	818;818;820;818;818	-0.00223952	1.32774	1097	6418	2.54856	Flagellum adhesion protein 3
Tb927.11.15400:mRNA-p1;Tb11.v5.0678.1-p1	Tb927.11.15400:mRNA-p1	synaptobrevin, putative	26;7	24.9	133.6	1218	1218;555	-0.00223952	1.32715	1098	3596	1.71151	synaptobrevin, putative
Tb927.5.2080:mRNA-p1	Tb927.5.2080:mRNA-p1	GMP reductase	23	55.8	52.238	491	491	-0.00223952	1.32621	1099	914	-0.265925	GMP reductase
Tb927.11.1900:mRNA-p1	Tb927.11.1900:mRNA-p1	T-complex protein 1, beta subunit, putative	45	80.5	58.057	529	529	-0.00223952	1.32251	1100	205	-2.42381	T-complex protein 1, beta subunit, putative
Tb927.5.2700:mRNA-p1	Tb927.5.2700:mRNA-p1	otubain cysteine peptidase, Clan CA, family C65, putative	4	24.3	30.443	268	268	-0.00223952	1.32238	1101	2529	1.19975	otubain cysteine peptidase, Clan CA, family C65, putative
Tb927.7.2540:mRNA-p1	Tb927.7.2540:mRNA-p1	ubiquitin-protein ligase, putative	3	23	25.088	226	226	-0.00223952	1.32164	1102	4557	2.04796	ubiquitin-protein ligase, putative
Tb927.10.1100:mRNA-p1;Tb927.6.4690:mRNA-p1	Tb927.10.1100:mRNA-p1;Tb927.6.4690:mRNA-p1	60S ribosomal protein L9, putative	21;18	76.2	21.857	189	189;187	-0.00223952	1.32053	1103	284	-1.95747	60S ribosomal protein L9, putative
Tb927.7.2970:mRNA-p1	Tb927.7.2970:mRNA-p1	ATP-dependent DEAD/H RNA helicase, putative	15	18.9	92.253	824	824	-0.00223952	1.32037	1104	3215	1.54208	ATP-dependent DEAD/H RNA helicase, putative
Tb927.5.890:mRNA-p1	Tb927.5.890:mRNA-p1	oligosaccharyl transferase subunit, putative	7	11.6	89.347	801	801	-0.00223952	1.31944	1105	1561	0.498424	oligosaccharyl transferase subunit, putative
Tb927.7.3870:mRNA-p1	Tb927.7.3870:mRNA-p1	hypothetical protein, conserved	2	11.3	28.924	256	256	-0.00223952	1.31869	1106	4295	1.95731	hypothetical protein, conserved
Tb927.9.13320:mRNA-p1	Tb927.9.13320:mRNA-p1	hypothetical protein, conserved	12	30.6	55.399	507	507	-0.00223952	1.3159	1107	1646	0.572309	hypothetical protein, conserved
Tb927.8.4820:mRNA-p1;Tb11.v5.0659.1-p1	Tb927.8.4820:mRNA-p1;Tb11.v5.0659.1-p1	eukaryotic translation initiation factor 4 gamma 3	17;10	32.8	69.338	622	622;441	-0.00223952	1.3155	1108	1686	0.605647	eukaryotic translation initiation factor 4 gamma 3
Tb927.4.4670:mRNA-p1	Tb927.4.4670:mRNA-p1	MYND finger, putative	19	39.8	54.134	483	483	-0.00223952	1.31436	1109	2386	1.10533	MYND finger, putative
Tb927.11.1670:mRNA-p1	Tb927.11.1670:mRNA-p1	cysteine desulfurase	16	51.9	48.151	437	437	-0.00223952	1.31419	1110	2769	1.31881	cysteine desulfurase
Tb927.8.1410:mRNA-p1;Tb11.v5.0588.1-p1	Tb927.8.1410:mRNA-p1;Tb11.v5.0588.1-p1	pre-rrna-processing protein tsr1 homolog	4;3	8.9	87.442	777	777;491	-0.00223952	1.31239	1111	2661	1.26011	pre-rrna-processing protein tsr1 homolog
Tb927.11.5250:mRNA-p1	Tb927.11.5250:mRNA-p1	hypothetical protein, conserved	5	3.3	177.31	1584	1584	-0.00223952	1.30743	1112	4364	1.97249	hypothetical protein, conserved
Tb927.8.2950:mRNA-p1	Tb927.8.2950:mRNA-p1	hypothetical protein, conserved	5	16.8	54.49	489	489	-0.00223952	1.30708	1113	4216	1.92142	hypothetical protein, conserved
Tb927.11.15690:mRNA-p1	Tb927.11.15690:mRNA-p1	U5 snRNP-associated 102 kDa protein, putative	16	19	111.07	1009	1009	-0.00223952	1.30643	1114	3263	1.55045	U5 snRNP-associated 102 kDa protein, putative
Tb927.9.5690:mRNA-p1	Tb927.9.5690:mRNA-p1	60S acidic ribosomal protein, putative	11	95.6	11.09	113	113	-0.00223952	1.30562	1115	234	-2.25246	60S acidic ribosomal protein, putative
Tb927.9.1710:mRNA-p1	Tb927.9.1710:mRNA-p1	hypothetical protein, conserved	13	34.8	52.951	465	465	-0.00223952	1.3039	1116	2387	1.09686	hypothetical protein, conserved
Tb11.v5.0826.1-p1;Tb927.7.6860:mRNA-p1	Tb11.v5.0826.1-p1;Tb927.7.6860:mRNA-p1	expression site-associated gene (ESAG) protein, putative	2;2	5.6	50.162	464	464;480	-0.00223952	1.30374	1117	1493	0.418585	expression site-associated gene (ESAG) protein, putative
Tb927.4.2000:mRNA-p1	Tb927.4.2000:mRNA-p1	ruvB-like DNA helicase, putative	26	63.3	52.61	474	474	-0.00223952	1.303	1118	558	-1.00258	ruvB-like DNA helicase, putative
Tb927.7.7070:mRNA-p1;Tb11.v5.0612.1-p1	Tb927.7.7070:mRNA-p1;Tb11.v5.0612.1-p1	MYND finger, putative	13;13	31.6	49.45	443	443;443	-0.00223952	1.30203	1119	1179	0.0753537	MYND finger, putative
Tb927.9.10500:mRNA-p1	Tb927.9.10500:mRNA-p1	HAD hydrolase, TIGR01456 family/HAD hydrolase, family IIA, putative	14	31.4	59.455	529	529	-0.00223952	1.30145	1120	3722	1.73258	HAD hydrolase, TIGR01456 family/HAD hydrolase, family IIA, putative
Tb927.10.9330:mRNA-p1	Tb927.10.9330:mRNA-p1	hypothetical protein, conserved	26	54.9	66.031	603	603	-0.00223952	1.30109	1121	1877	0.743642	hypothetical protein, conserved
Tb927.4.5380:mRNA-p1;Tb927.8.6940:mRNA-p1	Tb927.4.5380:mRNA-p1;Tb927.8.6940:mRNA-p1	Cilia- and flagella-associated protein 43	17;16	13.2	164.95	1460	1460;1460	-0.00223952	1.3009	1122	7149	2.67167	Cilia- and flagella-associated protein 43
Tb927.11.11900:mRNA-p1	Tb927.11.11900:mRNA-p1	Coatomer subunit gamma	32	41	97.586	878	878	-0.00223952	1.3001	1123	756	-0.5709	Coatomer subunit gamma
Tb927.10.11730:mRNA-p1	Tb927.10.11730:mRNA-p1	zinc finger protein family member, putative	13	21.8	83.078	756	756	-0.00223952	1.29822	1124	5209	2.21236	zinc finger protein family member, putative
Tb927.1.1080:mRNA-p1	Tb927.1.1080:mRNA-p1	TFIIH basal transcription factor subunit, putative	7	21.9	53.61	485	485	-0.00223952	1.29632	1125	5049	2.16607	TFIIH basal transcription factor subunit, putative
Tb927.8.3770:mRNA-p1	Tb927.8.3770:mRNA-p1	Mitogen-activated protein kinase 10, putative	24	61.4	46.936	409	409	-0.00223952	1.29475	1126	810	-0.475213	Mitogen-activated protein kinase 10, putative
Tb927.10.11610:mRNA-p1	Tb927.10.11610:mRNA-p1	SKP1-like protein	6	37.1	25.46	229	229	-0.00223952	1.29452	1127	3114	1.46628	SKP1-like protein
Tb927.11.9290:mRNA-p1	Tb927.11.9290:mRNA-p1	Flagellum attachment zone protein 20	26	39.3	85.448	763	763	-0.00223952	1.29377	1128	3436	1.60696	Flagellum attachment zone protein 20
Tb927.11.5170:mRNA-p1	Tb927.11.5170:mRNA-p1	ubiquitin activating enzyme, putative	4	22.7	30.017	277	277	-0.00223952	1.28997	1129	5016	2.15149	ubiquitin activating enzyme, putative
Tb927.11.11700:mRNA-p1	Tb927.11.11700:mRNA-p1	nucleotidyl transferase, putative	11	32	63.371	585	585	-0.00223952	1.28903	1130	2959	1.38879	nucleotidyl transferase, putative
Tb927.6.4510:mRNA-p1	Tb927.6.4510:mRNA-p1	hypothetical protein, conserved	2	6.5	36.573	325	325	-0.00223952	1.28741	1131	5688	2.33032	hypothetical protein, conserved
Tb927.2.5160:mRNA-p1	Tb927.2.5160:mRNA-p1	chaperone protein DnaJ, putative	33	76.2	44.327	400	400	-0.00223952	1.28682	1132	360	-1.65281	chaperone protein DnaJ, putative
Tb927.11.8180:mRNA-p1	Tb927.11.8180:mRNA-p1	hypothetical protein, conserved	19	62.4	31.117	282	282	-0.00223952	1.28372	1133	2764	1.28661	hypothetical protein, conserved
Tb927.10.14810:mRNA-p1	Tb927.10.14810:mRNA-p1	multiprotein-bridging factor 1, putative	3	18.1	17.974	160	160	-0.00223952	1.28363	1134	1516	0.418849	multiprotein-bridging factor 1, putative
Tb927.6.4020:mRNA-p1	Tb927.6.4020:mRNA-p1	hypothetical protein, conserved	8	84.9	11.61	106	106	-0.00223952	1.28319	1135	758	-0.582423	hypothetical protein, conserved
Tb927.11.9830:mRNA-p1	Tb927.11.9830:mRNA-p1	LSU ribosomal protein, mitochondrial, putative	4	22.3	22.572	197	197	-0.00223952	1.28245	1136	5493	2.27363	LSU ribosomal protein, mitochondrial, putative
Tb927.11.6970.2:mRNA-p1;Tb927.11.6970.1:mRNA-p1	Tb927.11.6970.2:mRNA-p1;Tb927.11.6970.1:mRNA-p1	NADH-cytochrome b5 reductase-like protein	9;8	30.9	44.136	388	388;269	-0.00223952	1.28231	1137	4626	2.02453	NADH-cytochrome b5 reductase-like protein
Tb927.2.4650:mRNA-p1	Tb927.2.4650:mRNA-p1	hypothetical protein, conserved	4	22.9	27.774	253	253	-0.00223952	1.28138	1138	4163	1.87112	hypothetical protein, conserved
Tb927.11.6660:mRNA-p1	Tb927.11.6660:mRNA-p1	Tex-like protein N-terminal domain/Helix-hairpin-helix motif containing protein, putative	24	32.3	103.55	935	935	-0.00223952	1.28104	1139	3747	1.71797	Tex-like protein N-terminal domain/Helix-hairpin-helix motif containing protein, putative
Tb927.4.1100:mRNA-p1;Tb927.11.680:mRNA-p1;Tb11.0880:mRNA-p1	Tb927.4.1100:mRNA-p1;Tb927.11.680:mRNA-p1;Tb11.0880:mRNA-p1	ribosomal protein L21E (60S), putative	15;15;15	66	18.015	159	159;159;159	-0.00223952	1.27986	1140	304	-1.90689	ribosomal protein L21E (60S), putative
Tb927.10.8600:mRNA-p1	Tb927.10.8600:mRNA-p1	Vps54-like protein, putative	16	22.2	119.84	1089	1089	-0.00223952	1.27716	1141	2552	1.16133	Vps54-like protein, putative
Tb927.3.3170:mRNA-p1	Tb927.3.3170:mRNA-p1	SUMO-interacting motif-containing protein	6	11.6	70.454	654	654	-0.00223952	1.27669	1142	1603	0.489212	SUMO-interacting motif-containing protein
Tb927.6.1670:pseudogenic_transcript-p1	Tb927.6.1670:pseudogenic_transcript-p1	PAB-dependent poly(A)-specific ribonuclease subunit PAN2 (pseudogene)	8	9.3	119.36	1086	1086	-0.00223952	1.27613	1143	2967	1.37618	PAB-dependent poly(A)-specific ribonuclease subunit PAN2 (pseudogene)
Tb927.5.3800:mRNA-p1	Tb927.5.3800:mRNA-p1	glutamine hydrolysing (not ammonia-dependent) carbomoyl phosphate synthase, putative	70	38.2	204.09	1833	1833	-0.00223952	1.27311	1144	493	-1.21443	glutamine hydrolysing (not ammonia-dependent) carbomoyl phosphate synthase, putative
Tb927.11.8090:mRNA-p1	Tb927.11.8090:mRNA-p1	protein phosphatase 1, putative	8	33.7	34.443	303	303	-0.00223952	1.27148	1145	1550	0.436921	protein phosphatase 1, putative
Tb11.v5.0739.1-p1;Tb927.7.7000:mRNA-p1	Tb11.v5.0739.1-p1;Tb927.7.7000:mRNA-p1	SUMO-interacting motif-containing protein	5;4	6.8	84.657	762	762;1596	-0.00223952	1.27013	1146	6128	2.41881	SUMO-interacting motif-containing protein
Tb927.11.9190:mRNA-p1	Tb927.11.9190:mRNA-p1	Serine/threonine-protein kinase VPS15	17	13.6	150.6	1370	1370	-0.00223952	1.2663	1147	4976	2.11712	Serine/threonine-protein kinase VPS15
Tb927.9.4520:mRNA-p1	Tb927.9.4520:mRNA-p1	Mitochondrial-processing peptidase subunit beta	23	58.3	53.689	477	477	-0.00223952	1.26448	1148	1478	0.364524	Mitochondrial-processing peptidase subunit beta
Tb927.7.5560:mRNA-p1	Tb927.7.5560:mRNA-p1	glucosamine-fructose-6-phosphate aminotransferase, putative	19	38.4	71.523	659	659	-0.00223952	1.26121	1149	1856	0.691818	glucosamine-fructose-6-phosphate aminotransferase, putative
Tb927.1.1400:mRNA-p1	Tb927.1.1400:mRNA-p1	Overproducer of inositol protein 10 homolog, putative	7	42	21.445	193	193	-0.00223952	1.26055	1150	3400	1.5639	Overproducer of inositol protein 10 homolog, putative
Tb927.6.4780.1:mRNA-p1;Tb927.6.4780.2:mRNA-p1	Tb927.6.4780.1:mRNA-p1;Tb927.6.4780.2:mRNA-p1	DNA ligase I, putative	6;6	10.7	77.331	699	699;746	-0.00223952	1.25958	1151	2878	1.32218	DNA ligase I, putative
Tb927.9.10640:mRNA-p1	Tb927.9.10640:mRNA-p1	synaptojanin (N-terminal domain), putative	4	6.5	83.045	755	755	-0.00223952	1.25744	1152	3280	1.50956	synaptojanin (N-terminal domain), putative
Tb927.11.10480:mRNA-p1	Tb927.11.10480:mRNA-p1	PQQ-like domain/WD domain, G-beta repeat/Utp21 specific WD40 associated putative domain containing protein, putative |	5	6.5	106.94	975	975	-0.00223952	1.25723	1153	3288	1.51182	PQQ-like domain/WD domain, G-beta repeat/Utp21 specific WD40 associated putative domain containing protein, putative |
Tb927.7.3080:mRNA-p1	Tb927.7.3080:mRNA-p1	Kinetochore interacting protein 4	9	26.1	47.366	429	429	-0.00223952	1.25694	1154	2526	1.13021	Kinetochore interacting protein 4
Tb927.11.3720:mRNA-p1	Tb927.11.3720:mRNA-p1	Ring finger domain containing protein, putative	12	43.5	50.46	460	460	-0.00223952	1.25549	1155	7149	2.62985	Ring finger domain containing protein, putative
Tb927.11.2370:mRNA-p1	Tb927.11.2370:mRNA-p1	mRNA export factor MEX67	9	19	62.541	575	575	-0.00223952	1.25463	1156	2075	0.84397	mRNA export factor MEX67
Tb927.10.1740:mRNA-p1	Tb927.10.1740:mRNA-p1	hypothetical protein, conserved	15	44.2	42.369	382	382	-0.00223952	1.25437	1157	4267	1.88283	hypothetical protein, conserved
Tb927.9.13920:mRNA-p1;Tb927.9.13860:mRNA-p1;Tb927.9.13820:mRNA-p1;Tb927.9.13795:mRNA-p1;Tb927.9.13785:mRNA-p1	Tb927.9.13920:mRNA-p1;Tb927.9.13860:mRNA-p1;Tb927.9.13820:mRNA-p1;Tb927.9.13795:mRNA-p1;Tb927.9.13785:mRNA-p1	kinetoplastid membrane protein 11-1	21;21;21;21;21	98.9	11.076	92	92;92;92;92;92	-0.00223952	1.2539	1158	78	-3.89202	kinetoplastid membrane protein 11-1
Tb927.7.4030:mRNA-p1	Tb927.7.4030:mRNA-p1	hypothetical protein, conserved	23	54.1	59.792	538	538	-0.00223952	1.25261	1159	2443	1.07577	hypothetical protein, conserved
Tb927.8.4230:mRNA-p1	Tb927.8.4230:mRNA-p1	hypothetical protein, conserved	3	4.4	119.02	1082	1082	-0.00223952	1.25174	1160	2691	1.21402	hypothetical protein, conserved
Tb927.8.1360:mRNA-p1;Tb11.v5.0779.1-p1	Tb927.8.1360:mRNA-p1	Dynein heavy chain, N-terminal region 2, putative	7;2	2	473.17	4224	4224;674	-0.00223952	1.25136	1161	3486	1.5862	Dynein heavy chain, N-terminal region 2, putative
Tb927.10.13360:mRNA-p1	Tb927.10.13360:mRNA-p1	Elongation factor Tu, mitochondrial	30	76.8	51.849	470	470	-0.00223952	1.25092	1162	925	-0.329085	Elongation factor Tu, mitochondrial
Tb927.11.3890:mRNA-p1	Tb927.11.3890:mRNA-p1	N(2), N(2)-dimethylguanosine tRNA methyltransferase, putative	11	17	78.84	724	724	-0.00223952	1.25051	1163	3763	1.69403	N(2), N(2)-dimethylguanosine tRNA methyltransferase, putative
Tb927.11.15370:mRNA-p1	Tb927.11.15370:mRNA-p1	Importin subunit beta-4, putative	21	24.4	117.88	1072	1072	-0.00223952	1.24929	1164	448	-1.37752	Importin subunit beta-4, putative
Tb927.9.3280:mRNA-p1	Tb927.9.3280:mRNA-p1	exopolyphosphatase	13	37.1	42.865	383	383	-0.00223952	1.24854	1165	1553	0.414728	exopolyphosphatase
Tb927.10.11380:mRNA-p1	Tb927.10.11380:mRNA-p1	hypothetical protein, conserved	2	4.9	44.731	390	390	-0.00223952	1.24693	1166	4355	1.9011	hypothetical protein, conserved
Tb927.2.4810:mRNA-p1	Tb927.2.4810:mRNA-p1	Component of motile flagella 5	18	20.3	150.5	1340	1340	-0.00223952	1.2436	1167	1123	-0.0554466	Component of motile flagella 5
Tb927.11.16860:mRNA-p1	Tb927.11.16860:mRNA-p1	mitochondrial RNA binding protein	11	30.5	53.077	482	482	-0.00223952	1.24357	1168	3041	1.38051	mitochondrial RNA binding protein
Tb927.9.2900:mRNA-p1	Tb927.9.2900:mRNA-p1	Nucleolar protein 287	50	20	287.19	2631	2631	-0.00223952	1.24329	1169	1250	0.0966532	Nucleolar protein 287
Tb927.11.15800:mRNA-p1	Tb927.11.15800:mRNA-p1	Cytokinesis initiation factor 1	9	18.2	89.585	793	793	-0.00223952	1.24224	1170	2861	1.29001	Cytokinesis initiation factor 1
Tb927.10.11230:mRNA-p1	Tb927.10.11230:mRNA-p1	Ras-induced vulval development antagonist, putative	3	11.5	34.706	323	323	-0.00223952	1.24177	1171	5030	2.10282	Ras-induced vulval development antagonist, putative
Tb927.9.14330:mRNA-p1	Tb927.9.14330:mRNA-p1	mismatch repair protein PMS1, putative	9	16.4	86.252	788	788	-0.00223952	1.24068	1172	4457	1.9271	mismatch repair protein PMS1, putative
Tb927.8.6160:mRNA-p1;Tb927.8.6150:mRNA-p1	Tb927.8.6160:mRNA-p1;Tb927.8.6150:mRNA-p1	40S ribosomal protein S8, putative	14;14	50.9	24.937	220	220;220	-0.00223952	1.23749	1173	410	-1.51651	40S ribosomal protein S8, putative
Tb927.10.7410:mRNA-p1	Tb927.10.7410:mRNA-p1	succinyl-CoA ligase [GDP-forming] beta-chain, putative	31	73.5	44.905	419	419	-0.00223952	1.23704	1174	343	-1.77515	succinyl-CoA ligase [GDP-forming] beta-chain, putative
Tb927.6.2790:mRNA-p1;REV__Tb927.6.2790:mRNA-p1	Tb927.6.2790:mRNA-p1	L-threonine 3-dehydrogenase	21;1	75	36.957	332	332;332	-0.00223952	1.23672	1175	348	-1.7555	L-threonine 3-dehydrogenase
Tb927.10.11310:mRNA-p1	Tb927.10.11310:mRNA-p1	intraflagellar transport protein 57/55	19	55.7	46.366	413	413	-0.00223952	1.23624	1176	869	-0.43646	intraflagellar transport protein 57/55
Tb927.11.2520:mRNA-p1	Tb927.11.2520:mRNA-p1	UDP-n-acetylglucosamine pyrophosphorylase	4	11.9	60.161	545	545	-0.00223952	1.2351	1177	1406	0.256482	UDP-n-acetylglucosamine pyrophosphorylase
Tb927.3.2280:mRNA-p1	Tb927.3.2280:mRNA-p1	vacuolar sorting protein 33 , putative	8	15.1	66.938	597	597	-0.00223952	1.23266	1178	3021	1.35869	vacuolar sorting protein 33 , putative
Tb927.4.2180:mRNA-p1	Tb927.4.2180:mRNA-p1	60S ribosomal protein L35a, putative	20	71.8	17.021	149	149	-0.00223952	1.22678	1179	529	-1.15622	60S ribosomal protein L35a, putative
Tb927.2.4890:mRNA-p1;Tb927.2.4740:mRNA-p1	Tb927.2.4890:mRNA-p1;Tb927.2.4740:mRNA-p1	mitochondrial ribosomal protein l11	3;3	8.8	40.186	342	342;342	-0.00223952	1.2247	1180	4575	1.95498	mitochondrial ribosomal protein l11
Tb927.9.15170:mRNA-p1;Tb927.9.15110:mRNA-p1	Tb927.9.15170:mRNA-p1;Tb927.9.15110:mRNA-p1	60S ribosomal protein L5, putative	22;22	50.6	34.636	308	308;308	-0.00223952	1.22414	1181	266	-2.15051	60S ribosomal protein L5, putative
Tb927.8.6200:mRNA-p1	Tb927.8.6200:mRNA-p1	tubulin folding cofactor D, putative	13	12.7	147.63	1343	1343	-0.00223952	1.22399	1182	1725	0.545366	tubulin folding cofactor D, putative
Tb927.8.1340:mRNA-p1;Tb927.8.1330:mRNA-p1	Tb927.8.1340:mRNA-p1;Tb927.8.1330:mRNA-p1	60S ribosomal protein L7a, putative	25;25	53.3	30.879	276	276;276	-0.00223952	1.22283	1183	222	-2.41382	60S ribosomal protein L7a, putative
Tb927.6.720:mRNA-p1;Tb927.11.11230:mRNA-p1	Tb927.6.720:mRNA-p1;Tb927.11.11230:mRNA-p1	40S ribosomal protein L14, putative	21;17	55	21.443	189	189;189	-0.00223952	1.22154	1184	356	-1.73372	40S ribosomal protein L14, putative
Tb927.10.8110:mRNA-p1	Tb927.10.8110:mRNA-p1	Protein of unknown function (DUF2453), putative	20	34.7	30.41	274	274	-0.00223952	1.22083	1185	3949	1.7366	Protein of unknown function (DUF2453), putative
Tb927.8.1110:mRNA-p1;Tb927.10.5610:mRNA-p1	Tb927.8.1110:mRNA-p1;Tb927.10.5610:mRNA-p1	40S ribosomal protein S9, putative	13;13	45.3	22.051	190	190;190	-0.00223952	1.21743	1186	279	-2.08777	40S ribosomal protein S9, putative
Tb927.9.14470:mRNA-p1	Tb927.9.14470:mRNA-p1	ubiquitin carboxyl-terminal hydrolase, putative	14	14.1	132.38	1161	1161	-0.00223952	1.2172	1187	1698	0.516517	ubiquitin carboxyl-terminal hydrolase, putative
Tb927.4.410:mRNA-p1	Tb927.4.410:mRNA-p1	CAF 40	12	47.2	35.32	316	316	-0.00223952	1.21664	1188	1221	0.0395284	CAF 40
Tb927.9.9550:mRNA-p1	Tb927.9.9550:mRNA-p1	conserved protein, unknown function	12	55.7	24.509	212	212	-0.00223952	1.21535	1189	644	-0.884616	conserved protein, unknown function
Tb927.9.10890:mRNA-p1	Tb927.9.10890:mRNA-p1	Regulatory subunit of type II PKA R-subunit, putative	4	20.1	31.568	268	268	-0.00223952	1.21433	1190	1402	0.236525	Regulatory subunit of type II PKA R-subunit, putative
Tb927.11.1450:mRNA-p1	Tb927.11.1450:mRNA-p1	2-oxoglutarate dehydrogenase E1 component, putative	44	48.3	113.38	1008	1008	-0.00223952	1.21118	1191	598	-0.993956	2-oxoglutarate dehydrogenase E1 component, putative
Tb927.3.1350:mRNA-p1	Tb927.3.1350:mRNA-p1	hypothetical protein, conserved	31	45.5	86.927	786	786	-0.00223952	1.20939	1192	2617	1.13453	hypothetical protein, conserved
Tb927.10.1060:mRNA-p1	Tb927.10.1060:mRNA-p1	T-complex protein 1, delta subunit, putative	34	67.5	58.361	536	536	-0.00223952	1.2068	1193	330	-1.85406	T-complex protein 1, delta subunit, putative
Tb927.2.830:pseudogenic_transcript-p1;Tb11.v5.0655.1-p1	Tb927.2.830:pseudogenic_transcript-p1;Tb11.v5.0655.1-p1	retrotransposon hot spot protein 1 (RHS1), interrupted	9;9	28.1	40.504	352	352;427	-0.00223952	1.20476	1194	2728	1.19204	retrotransposon hot spot protein 1 (RHS1), interrupted
Tb927.11.11830:mRNA-p1;Tb927.11.11820:mRNA-p1	Tb927.11.11830:mRNA-p1;Tb927.11.11820:mRNA-p1	40S ribosomal protein S17, putative	23;23	74.6	16.222	142	142;142	-0.00223952	1.20476	1195	308	-1.95601	40S ribosomal protein S17, putative
Tb927.2.5150:mRNA-p1	Tb927.2.5150:mRNA-p1	TPR-repeat protein, putative	7	17.6	54.016	489	489	-0.00223952	1.20459	1196	1491	0.318063	TPR-repeat protein, putative
Tb927.11.6610:mRNA-p1	Tb927.11.6610:mRNA-p1	hypothetical protein, conserved	2	6.9	40.25	364	364	-0.00223952	1.20366	1197	1063	-0.171282	hypothetical protein, conserved
Tb927.10.13280:mRNA-p1	Tb927.10.13280:mRNA-p1	hypothetical protein, conserved	62	23.7	286.2	2606	2606	-0.00223952	1.20259	1198	855	-0.486632	hypothetical protein, conserved
Tb927.10.14360:mRNA-p1	Tb927.10.14360:mRNA-p1	U2 small nuclear ribonucleoprotein 40K	8	32.9	36.492	325	325	-0.00223952	1.20252	1199	3239	1.43372	U2 small nuclear ribonucleoprotein 40K
Tb927.10.270:mRNA-p1	Tb927.10.270:mRNA-p1	60S ribosomal protein L32, putative	2	9.1	15.396	132	132	-0.00223952	1.20126	1200	616	-0.962032	60S ribosomal protein L32, putative
Tb927.10.2580:mRNA-p1	Tb927.10.2580:mRNA-p1	Nucleolar protein 12 (25kDa), putative	3	11.9	33.249	294	294	-0.00223952	1.201	1201	6507	2.43776	Nucleolar protein 12 (25kDa), putative
Tb927.6.4980:mRNA-p1;Tb927.11.7705:mRNA-p1;Tb11.0390:mRNA-p1;Tb11.0290:mRNA-p1	Tb927.6.4980:mRNA-p1;Tb927.11.7705:mRNA-p1;Tb11.0390:mRNA-p1;Tb11.0290:mRNA-p1	40S ribosomal protein S14	12;12;12;12	54.9	15.513	144	144;144;144;144	-0.00223952	1.19925	1202	337	-1.83462	40S ribosomal protein S14
Tb927.9.12830:mRNA-p1	Tb927.9.12830:mRNA-p1	hypothetical protein, conserved	4	8.7	65.286	586	586	-0.00223952	1.19625	1203	2023	0.74986	hypothetical protein, conserved
Tb927.2.5820:mRNA-p1	Tb927.2.5820:mRNA-p1	hypothetical protein, conserved	15	18.6	117.49	1081	1081	-0.00223952	1.19568	1204	2065	0.778306	hypothetical protein, conserved
Tb927.10.2770:mRNA-p1;Tb11.v5.0684.1-p1	Tb927.10.2770:mRNA-p1;Tb11.v5.0684.1-p1	eukaryotic translation initiation factor 5, putative	21;21	59.7	42.945	382	382;382	-0.00223952	1.19564	1205	768	-0.649855	eukaryotic translation initiation factor 5, putative
Tb927.10.5250:mRNA-p1;Tb11.v5.0232.1-p1	Tb927.10.5250:mRNA-p1;Tb11.v5.0232.1-p1	zinc finger protein family member, putative	32;31	61.1	72.04	655	655;630	-0.00223952	1.19559	1206	1808	0.584165	zinc finger protein family member, putative
Tb927.9.5100:mRNA-p1	Tb927.9.5100:mRNA-p1	cAMP-specific phosphodiesterase	15	20.8	103.22	925	925	-0.00223952	1.19383	1207	1142	-0.079863	cAMP-specific phosphodiesterase
Tb927.6.4120:mRNA-p1	Tb927.6.4120:mRNA-p1	GTPase activating protein, putative	3	12.2	44.924	393	393	-0.00223952	1.193	1208	4055	1.74708	GTPase activating protein, putative
Tb927.3.5310:mRNA-p1	Tb927.3.5310:mRNA-p1	paraflagellar rod protein	60	47.4	242.78	2128	2128	-0.00223952	1.19282	1209	1293	0.096908	paraflagellar rod protein
Tb927.11.460:mRNA-p1;Tb11.v5.0726.1-p1	Tb927.11.460:mRNA-p1;Tb11.v5.0726.1-p1	predicted WD40 repeat protein	9;5	10.5	103.67	948	948;694	-0.00223952	1.19128	1210	3235	1.41876	predicted WD40 repeat protein
Tb11.v5.0501.1-p1;Tb927.10.3940:mRNA-p1;Tb927.10.3930:mRNA-p1	Tb11.v5.0501.1-p1;Tb927.10.3940:mRNA-p1;Tb927.10.3930:mRNA-p1	40S ribosomal protein S3A, putative	31;31;30	69.9	29.422	256	256;256;256	-0.00223952	1.19096	1211	187	-2.69509	40S ribosomal protein S3A, putative
Tb927.7.5090:mRNA-p1;Tb11.v5.0189.1-p1	Tb927.7.5090:mRNA-p1;Tb11.v5.0189.1-p1	condensin complex subunit 2, putative	31;20	36.5	102.36	954	954;737	-0.00223952	1.19068	1212	2436	1.00712	condensin complex subunit 2, putative
Tb927.3.1790:mRNA-p1	Tb927.3.1790:mRNA-p1	pyruvate dehydrogenase E1 beta subunit, putative	14	50.6	37.566	348	348	-0.00223952	1.1887	1213	485	-1.32252	pyruvate dehydrogenase E1 beta subunit, putative
Tb927.11.2950:mRNA-p1	Tb927.11.2950:mRNA-p1	Nucleoporin NUP89	22	29.1	89.154	796	796	-0.00223952	1.18864	1214	1576	0.376499	Nucleoporin NUP89
Tb927.9.2760:mRNA-p1	Tb927.9.2760:mRNA-p1	EB1-like C-terminal motif containing protein, putative	10	31.9	56.997	536	536	-0.00223952	1.18793	1215	1786	0.555776	EB1-like C-terminal motif containing protein, putative
Tb927.10.2720:mRNA-p1	Tb927.10.2720:mRNA-p1	hypothetical protein, conserved	4	7.9	64.116	573	573	-0.00223952	1.18783	1216	3185	1.38915	hypothetical protein, conserved
Tb927.3.5610:mRNA-p1	Tb927.3.5610:mRNA-p1	Mitochondrial ribosomal protein L3	11	39.1	54.986	473	473	-0.00223952	1.18746	1217	4035	1.72924	Mitochondrial ribosomal protein L3
Tb927.7.4290:mRNA-p1	Tb927.7.4290:mRNA-p1	Nuclear distribution protein C homolog	9	25.9	33.703	297	297	-0.00223952	1.18689	1218	1005	-0.277319	Nuclear distribution protein C homolog
Tb927.9.11100:mRNA-p1	Tb927.9.11100:mRNA-p1	cAMP-dependent protein kinase catalytic subunit 1	4	21.6	38.039	334	334	-0.00223952	1.18648	1219	999	-0.287142	cAMP-dependent protein kinase catalytic subunit 1
Tb927.10.4040:mRNA-p1	Tb927.10.4040:mRNA-p1	3-keto-dihydrosphingosine reductase	3	11.8	38.045	348	348	-0.00223952	1.18544	1220	1667	0.450373	3-keto-dihydrosphingosine reductase
Tb927.6.2420:mRNA-p1	Tb927.6.2420:mRNA-p1	p22 protein precursor	3	18.1	25.349	227	227	-0.00223952	1.18474	1221	932	-0.389661	p22 protein precursor
Tb927.11.1820:mRNA-p1;Tb11.1400.1-p1	Tb927.11.1820:mRNA-p1;Tb11.1400.1-p1	translation initiation factor eIF2B delta subunit, putative	24;21	46.2	68.582	628	628;627	-0.00223952	1.18269	1222	1804	0.561955	translation initiation factor eIF2B delta subunit, putative
Tb927.11.7380:mRNA-p1	Tb927.11.7380:mRNA-p1	glycerol-3-phosphate dehydrogenase (FAD-dependent), mitochondrial	35	67.5	66.991	603	603	-0.00223952	1.18202	1223	197	-2.63416	glycerol-3-phosphate dehydrogenase (FAD-dependent), mitochondrial
Tb927.11.12610:mRNA-p1	Tb927.11.12610:mRNA-p1	cyclin 1	4	12.9	36.266	334	334	-0.00223952	1.1787	1224	2924	1.25634	cyclin 1
Tb927.2.5130:mRNA-p1	Tb927.2.5130:mRNA-p1	hypothetical protein, conserved	16	41	43.557	390	390	-0.00223952	1.17704	1225	3000	1.29218	hypothetical protein, conserved
Tb927.11.12540:mRNA-p1	Tb927.11.12540:mRNA-p1	leucine-rich repeat protein (LRRP), putative	8	9.5	115.21	1052	1052	-0.00223952	1.17674	1226	1339	0.127197	leucine-rich repeat protein (LRRP), putative
Tb927.10.7800:mRNA-p1	Tb927.10.7800:mRNA-p1	cop9 signalosome complex subunit, putative	3	11.9	42.667	387	387	-0.00223952	1.17673	1227	4650	1.9221	cop9 signalosome complex subunit, putative
Tb927.1.1240:mRNA-p1;Tb11.v5.0356.1-p1	Tb927.1.1240:mRNA-p1;Tb11.v5.0356.1-p1	cytidine triphosphate synthase, putative	23;23	41.9	65.212	589	589;589	-0.00223952	1.17032	1228	1947	0.664942	cytidine triphosphate synthase, putative
Tb927.11.10160:mRNA-p1	Tb927.11.10160:mRNA-p1	60S ribosomal protein L22, putative	2	13.1	15.259	130	130	-0.00223952	1.16931	1229	4594	1.90227	60S ribosomal protein L22, putative
Tb927.8.5330:mRNA-p1	Tb927.8.5330:mRNA-p1	tyrosyl/methionyl-tRNA synthetase, putative	8	47.1	24.204	223	223	-0.00223952	1.1677	1230	1109	-0.149399	tyrosyl/methionyl-tRNA synthetase, putative
Tb927.5.1110:mRNA-p1;Tb927.11.16280:mRNA-p1	Tb927.5.1110:mRNA-p1;Tb927.11.16280:mRNA-p1	60S ribosomal protein L8, putative	25;25	78.8	28.314	260	260;260	-0.00223952	1.16612	1231	212	-2.53769	60S ribosomal protein L8, putative
Tb927.7.1690:mRNA-p1	Tb927.7.1690:mRNA-p1	Silent information regulator 2 related protein 1	2	6.6	38.574	351	351	-0.00223952	1.16583	1232	1228	-0.0046917	Silent information regulator 2 related protein 1
Tb927.11.6710:mRNA-p1	Tb927.11.6710:mRNA-p1	predicted tetratricopeptide repeat (TPR) protein	4	13.9	43.185	381	381	-0.00223952	1.16465	1233	2140	0.795438	predicted tetratricopeptide repeat (TPR) protein
Tb927.10.5350:mRNA-p1;Tb11.v5.0242.1-p1;Tb11.v5.0241.1-p1	Tb927.10.5350:mRNA-p1;Tb11.v5.0242.1-p1	dynein heavy chain, putative	40;34;5	10.9	474.7	4142	4142;3448;570	-0.00223952	1.16207	1234	574	-1.10422	dynein heavy chain, putative
Tb927.1.740:mRNA-p1	Tb927.1.740:mRNA-p1	phosphatidylinositol-4-phosphate 5-kinase related	7	25.1	48.865	435	435	-0.00223952	1.15946	1235	3459	1.48584	phosphatidylinositol-4-phosphate 5-kinase related
Tb927.10.12870:mRNA-p1	Tb927.10.12870:mRNA-p1	Basal body protein	6	7	118.83	1087	1087	-0.00223952	1.158	1236	3364	1.4445	Basal body protein
Tb927.5.1900:mRNA-p1	Tb927.5.1900:mRNA-p1	Outer dynein arm docking complex protein 1, putative	5	12.8	69.353	610	610	-0.00223952	1.15708	1237	1082	-0.193145	Outer dynein arm docking complex protein 1, putative
Tb927.11.4130:mRNA-p1	Tb927.11.4130:mRNA-p1	ubiquitin-like protein, putative	11	23.1	67.282	620	620	-0.00223952	1.15705	1238	1633	0.399513	ubiquitin-like protein, putative
Tb927.1.3010:mRNA-p1	Tb927.1.3010:mRNA-p1	mRNA processing protein, putative	8	28.2	40.813	372	372	-0.00223952	1.15697	1239	2867	1.21037	mRNA processing protein, putative
Tb927.10.6090:mRNA-p1;Tb11.v5.0201.1-p1	Tb927.10.6090:mRNA-p1;Tb11.v5.0201.1-p1	tRNA pseudouridine synthase A, putative	6;5	13.2	76.905	688	688;619	-0.00223952	1.15296	1240	6217	2.32588	tRNA pseudouridine synthase A, putative
Tb927.6.4550:mRNA-p1	Tb927.6.4550:mRNA-p1	hypothetical protein, conserved	54	63.5	90.131	801	801	-0.00223952	1.15194	1241	1696	0.450633	hypothetical protein, conserved
Tb927.5.4320:mRNA-p1	Tb927.5.4320:mRNA-p1	Pre-mRNA polyadenylation factor FIP1	7	44.6	31.036	280	280	-0.00223952	1.15077	1242	2634	1.08459	Pre-mRNA polyadenylation factor FIP1
Tb927.8.7260:mRNA-p1	Tb927.8.7260:mRNA-p1	kinetoplast-associated protein, putative	30	33.3	114.45	1028	1028	-0.00223952	1.14859	1243	2268	0.867594	kinetoplast-associated protein, putative
Tb927.11.5030:mRNA-p1	Tb927.11.5030:mRNA-p1	hypothetical protein, conserved	14	45.9	35.573	314	314	-0.00223952	1.14754	1244	2097	0.75334	hypothetical protein, conserved
Tb927.4.4690:mRNA-p1	Tb927.4.4690:mRNA-p1	hypothetical protein, conserved	5	21.6	31.337	278	278	-0.00223952	1.14629	1245	1068	-0.221234	hypothetical protein, conserved
Tb927.10.7910:mRNA-p1	Tb927.10.7910:mRNA-p1	RNA editing complex protein, putative	2	10.1	21.451	189	189	-0.00223952	1.14437	1246	4959	1.99275	RNA editing complex protein, putative
Tb927.10.12710:mRNA-p1	Tb927.10.12710:mRNA-p1	heat shock protein 110, putative	37	50.8	90.863	811	811	-0.00223952	1.14236	1247	135	-3.20743	heat shock protein 110, putative
Tb927.11.1360:mRNA-p1	Tb927.11.1360:mRNA-p1	zinc-finger of a C2HC-type, putative	5	14.8	62.477	568	568	-0.00223952	1.14101	1248	3095	1.31032	zinc-finger of a C2HC-type, putative
Tb927.8.4200:mRNA-p1	Tb927.8.4200:mRNA-p1	hypothetical protein, conserved	4	9.6	69.999	627	627	-0.00223952	1.13955	1249	6945	2.4752	hypothetical protein, conserved
Tb927.8.2760:mRNA-p1	Tb927.8.2760:mRNA-p1	50S ribosome-binding GTPase, putative	11	23.9	52.159	477	477	-0.00223952	1.13749	1250	4829	1.9498	50S ribosome-binding GTPase, putative
Tb927.10.11390:mRNA-p1	Tb927.10.11390:mRNA-p1	60S ribosomal protein L6, putative	25	73.4	21.185	192	192	-0.00223952	1.1374	1251	241	-2.37598	60S ribosomal protein L6, putative
Tb927.8.1150:mRNA-p1	Tb927.8.1150:mRNA-p1	kinetoplastid kinetochore protein 9	11	38.6	39.248	342	342	-0.00223952	1.13511	1252	2751	1.13572	kinetoplastid kinetochore protein 9
Tb927.9.5900:mRNA-p1	Tb927.9.5900:mRNA-p1	glutamate dehydrogenase	38	41.3	112.11	992	992	-0.00223952	1.13327	1253	432	-1.53628	glutamate dehydrogenase
Tb927.5.1630:mRNA-p1	Tb927.5.1630:mRNA-p1	hypothetical protein, conserved	5	38.4	17.683	159	159	-0.00223952	1.13154	1254	2656	1.08272	hypothetical protein, conserved
Tb927.11.13500:mRNA-p1	Tb927.11.13500:mRNA-p1	par1	31	52	68.349	592	592	-0.00223952	1.12928	1255	147	-3.0938	par1
Tb927.11.210:mRNA-p1	Tb927.11.210:mRNA-p1	hypothetical protein, conserved	5	9.8	81.336	732	732	-0.00223952	1.12802	1256	4101	1.70714	hypothetical protein, conserved
Tb927.10.2880:mRNA-p1	Tb927.10.2880:mRNA-p1	Voltage-dependent calcium channel subunit, putative	7	2.9	303.77	2693	2693	-0.00223952	1.12796	1257	1225	-0.0372029	Voltage-dependent calcium channel subunit, putative
Tb927.3.2220:mRNA-p1	Tb927.3.2220:mRNA-p1	eukaryotic translation initiation factor 3 subunit j	4	34.5	23.8	220	220	-0.00223952	1.12643	1258	1918	0.608471	eukaryotic translation initiation factor 3 subunit j
Tb927.7.5320:mRNA-p1	Tb927.7.5320:mRNA-p1	hypothetical protein, conserved	14	21	83.43	746	746	-0.00223952	1.12589	1259	4684	1.89546	hypothetical protein, conserved
Tb927.2.2970:mRNA-p1	Tb927.2.2970:mRNA-p1	mitochondrial carrier protein	11	41	33.962	312	312	-0.00223952	1.1256	1260	1961	0.638166	mitochondrial carrier protein
Tb927.9.12170:mRNA-p1	Tb927.9.12170:mRNA-p1	leucine-rich repeat protein (LRRP), putative	4	20.3	32.359	291	291	-0.00223952	1.12539	1261	1566	0.312516	leucine-rich repeat protein (LRRP), putative
Tb927.7.3410:mRNA-p1	Tb927.7.3410:mRNA-p1	centrin-4	5	39.6	16.552	149	149	-0.00223952	1.1251	1262	683	-0.885754	centrin-4
Tb927.11.7840:mRNA-p1	Tb927.11.7840:mRNA-p1	ribonucleoside-diphosphate reductase large chain	24	26.8	94.606	838	838	-0.00223952	1.12156	1263	679	-0.895371	ribonucleoside-diphosphate reductase large chain
Tb927.10.15290:mRNA-p1;Tb11.v5.0628.1-p1	Tb927.10.15290:mRNA-p1	tubulin binding cofactor c, putative	34;6	24	181.96	1678	1678;604	-0.00223952	1.11945	1264	2302	0.864891	tubulin binding cofactor c, putative
Tb927.7.1340:mRNA-p1;Tb927.7.1320:mRNA-p1	Tb927.7.1340:mRNA-p1;Tb927.7.1320:mRNA-p1	10 kDa heat shock protein, putative	2;2	30	10.67	100	100;100	-0.00223952	1.11879	1265	154	-3.03814	10 kDa heat shock protein, putative
Tb927.2.2130:mRNA-p1	Tb927.2.2130:mRNA-p1	small GTP-binding protein RAB6, putative	4	16.5	25.385	230	230	-0.00223952	1.1182	1266	3261	1.36504	small GTP-binding protein RAB6, putative
Tb927.11.4210:mRNA-p1	Tb927.11.4210:mRNA-p1	U-box domain containing protein, putative	20	37.3	69.793	630	630	-0.00223952	1.11741	1267	901	-0.491818	U-box domain containing protein, putative
Tb927.6.4920:mRNA-p1;Tb927.6.4910:mRNA-p1;Tb927.6.4900:mRNA-p1;Tb927.6.4880:mRNA-p1;Tb927.6.4860:mRNA-p1;Tb927.6.4850:mRNA-p1;Tb927.6.4840:mRNA-p1;Tb927.6.4890:mRNA-p1;Tb927.6.4870:mRNA-p1	Tb927.6.4920:mRNA-p1;Tb927.6.4910:mRNA-p1;Tb927.6.4900:mRNA-p1;Tb927.6.4880:mRNA-p1;Tb927.6.4860:mRNA-p1;Tb927.6.4850:mRNA-p1;Tb927.6.4840:mRNA-p1;Tb927.6.4890:mRNA-p1;Tb927.6.4870:mRNA-p1	S-adenosylmethionine synthetase, putative	24;24;24;24;24;24;24;22;22	63.2	43.54	397	397;397;397;397;397;397;397;397;397	-0.00223952	1.11644	1268	525	-1.27217	S-adenosylmethionine synthetase, putative
Tb927.11.10660:mRNA-p1;Tb11.v5.0378.1-p1;Tb11.v5.0762.1-p1;Tb11.v5.0377.1-p1	Tb927.11.10660:mRNA-p1	Basal body protein	35;8;7;6	24	590.09	5401	5401;1449;810;767	-0.00223952	1.11314	1269	2207	0.798395	Basal body protein
Tb927.7.710:mRNA-p1	Tb927.7.710:mRNA-p1	heat shock 70 kDa protein, putative	34	63.1	70.211	639	639	-0.00223952	1.1114	1270	258	-2.29939	heat shock 70 kDa protein, putative
Tb927.10.13260:mRNA-p1;Tb11.v5.0846.1-p1;Tb11.v5.0845.1-p1	Tb927.10.13260:mRNA-p1	hypothetical protein, conserved	7;3;3	7.3	124.01	1157	1157;287;403	-0.00223952	1.11117	1271	5813	2.19332	hypothetical protein, conserved
Tb927.10.560:mRNA-p1	Tb927.10.560:mRNA-p1	40S ribosomal proteins S11, putative	4	19.5	20.087	174	174	-0.00223952	1.10958	1272	970	-0.391042	40S ribosomal proteins S11, putative
Tb927.10.5340:mRNA-p1;Tb927.10.5330:mRNA-p1;Tb11.v5.1060.1-p1;Tb11.v5.0243.1-p1	Tb927.10.5340:mRNA-p1;Tb927.10.5330:mRNA-p1;Tb11.v5.1060.1-p1;Tb11.v5.0243.1-p1	40S ribosomal protein S18, putative	24;24;24;24	78.4	17.51	153	153;153;153;153	-0.00223952	1.10954	1273	203	-2.64868	40S ribosomal protein S18, putative
Tb927.8.2630:mRNA-p1	Tb927.8.2630:mRNA-p1	kinesin-C	21	28.9	85.189	750	750	-0.00223952	1.10952	1274	837	-0.606066	kinesin-C
Tb927.11.7960:mRNA-p1	Tb927.11.7960:mRNA-p1	kinetoplast poly(A) polymerase 1	11	22.6	58.436	527	527	-0.00223952	1.10861	1275	3721	1.54519	kinetoplast poly(A) polymerase 1
Tb927.8.7200:mRNA-p1	Tb927.8.7200:mRNA-p1	Region in Clathrin and VPS, putative	37	34.4	125.33	1123	1123	-0.00223952	1.10645	1276	3380	1.40539	Region in Clathrin and VPS, putative
Tb927.6.3930:mRNA-p1	Tb927.6.3930:mRNA-p1	LSU ribosomal protein, mitochondrial, putative	9	30.5	49.246	426	426	-0.00223952	1.1052	1277	4375	1.77652	LSU ribosomal protein, mitochondrial, putative
Tb927.7.4020:mRNA-p1	Tb927.7.4020:mRNA-p1	protein phosphatase 2C, putative	4	7.5	78.079	746	746	-0.00223952	1.1041	1278	1575	0.301464	protein phosphatase 2C, putative
Tb927.11.12980:mRNA-p1	Tb927.11.12980:mRNA-p1	hypothetical protein, conserved	4	13.5	47.228	444	444	-0.00223952	1.10318	1279	5173	2.01598	hypothetical protein, conserved
Tb927.7.6670:mRNA-p1	Tb927.7.6670:mRNA-p1	hypothetical protein, conserved	2	0.8	332.9	3030	3030	-0.00223952	1.10056	1280	1902	0.571373	hypothetical protein, conserved
Tb927.10.14340:mRNA-p1	Tb927.10.14340:mRNA-p1	hypothetical protein, conserved	6	5.6	126.88	1173	1173	-0.00223952	1.09997	1281	2395	0.902755	hypothetical protein, conserved
Tb927.10.16100:mRNA-p1;Tb11.v5.0411.1-p1	Tb927.10.16100:mRNA-p1;Tb11.v5.0411.1-p1	FK506-binding protein (FKBP)-type peptidyl-prolyl isomerase, putative	15;14	52.9	47.604	425	425;425	-0.00223952	1.09786	1282	207	-2.63069	FK506-binding protein (FKBP)-type peptidyl-prolyl isomerase, putative
Tb927.9.14120:mRNA-p1	Tb927.9.14120:mRNA-p1	NLI interacting factor-like phosphatase, putative	6	12.8	59.066	531	531	-0.00223952	1.09754	1283	3289	1.35813	NLI interacting factor-like phosphatase, putative
Tb927.7.4500:mRNA-p1;Tb11.v5.0263.1-p1	Tb927.7.4500:mRNA-p1;Tb11.v5.0263.1-p1	PX domain containing protein, putative	27;27	53.4	58.428	528	528;528	-0.00223952	1.09322	1284	428	-1.58496	PX domain containing protein, putative
Tb927.11.8700:mRNA-p1	Tb927.11.8700:mRNA-p1	hypothetical protein, conserved	3	6.9	65.26	581	581	-0.00223952	1.0928	1285	4097	1.6728	hypothetical protein, conserved
Tb927.6.1430:mRNA-p1	Tb927.6.1430:mRNA-p1	hypothetical protein, conserved	28	40.4	87.828	769	769	-0.00223952	1.09197	1286	2566	0.996631	hypothetical protein, conserved
Tb927.11.3380:mRNA-p1	Tb927.11.3380:mRNA-p1	Ran-binding protein 1, putative	4	30.6	17.703	157	157	-0.00223952	1.0918	1287	845	-0.606989	Ran-binding protein 1, putative
Tb927.11.1270:mRNA-p1	Tb927.11.1270:mRNA-p1	Mitochondrial ATP synthase subunit, putative	3	18.3	20.267	169	169	-0.00223952	1.09043	1288	2947	1.19411	Mitochondrial ATP synthase subunit, putative
Tb927.10.11590:mRNA-p1	Tb927.10.11590:mRNA-p1	nicotinate phosphoribosyltransferase, putative	22	50.2	48.917	428	428	-0.00223952	1.08893	1289	1508	0.226384	nicotinate phosphoribosyltransferase, putative
Tb927.10.2270:mRNA-p1	Tb927.10.2270:mRNA-p1	vacuolar protein sorting-associated protein 35, putative	12	15.3	104.36	933	933	-0.00223952	1.08827	1290	1382	0.0993866	vacuolar protein sorting-associated protein 35, putative
Tb927.7.450:mRNA-p1	Tb927.7.450:mRNA-p1	Golgi complex component 7 (COG7), putative	4	5.7	85.921	770	770	-0.00223952	1.08144	1291	2798	1.11591	Golgi complex component 7 (COG7), putative
Tb927.10.3390:mRNA-p1;Tb11.v5.0724.1-p1	Tb927.10.3390:mRNA-p1;Tb11.v5.0724.1-p1	predicted TLD domain protein	6;3	5.3	141.18	1272	1272;668	-0.00223952	1.08055	1292	4468	1.79002	predicted TLD domain protein
Tb927.8.1500:mRNA-p1	Tb927.8.1500:mRNA-p1	hypothetical protein, conserved	10	28.8	63.206	601	601	-0.00266273	1.07336	1293	1447	0.162343	hypothetical protein, conserved
Tb927.7.5080:mRNA-p1;Tb11.v5.0188.1-p1	Tb927.7.5080:mRNA-p1;Tb11.v5.0188.1-p1	ATP-NAD kinase-like protein	8;8	15.8	79.822	723	723;723	-0.00277494	1.07202	1294	4078	1.65602	ATP-NAD kinase-like protein
Tb927.8.7830:mRNA-p1	Tb927.8.7830:mRNA-p1	hypothetical protein, conserved	5	4.3	125.75	1172	1172	-0.00277494	1.07183	1295	7149	2.46479	hypothetical protein, conserved
Tb927.9.4630:mRNA-p1	Tb927.9.4630:mRNA-p1	hypothetical protein, conserved	6	5.3	147.14	1345	1345	-0.00277494	1.07142	1296	6953	2.42357	hypothetical protein, conserved
Tb927.7.7400:mRNA-p1	Tb927.7.7400:mRNA-p1	Basal body protein	5	7.5	247.99	2197	2197	-0.00277494	1.07075	1297	3311	1.35209	Basal body protein
Tb927.2.3660:mRNA-p1;Tb11.v5.0451.1-p1	Tb927.2.3660:mRNA-p1	paraflagellar rod component, putative	7;1	2.2	393.88	3577	3577;605	-0.00277494	1.07037	1298	3566	1.45802	paraflagellar rod component, putative
Tb927.4.3000:mRNA-p1;Tb11.v5.0967.1-p1	Tb927.4.3000:mRNA-p1;Tb11.v5.0967.1-p1	hypothetical protein, conserved	6;6	20.7	48.573	434	434;434	-0.00277494	1.06987	1299	5118	1.97818	hypothetical protein, conserved
Tb927.8.1510:mRNA-p1	Tb927.8.1510:mRNA-p1	ATP-dependent RNA helicase DBP2B, putative	40	75	62.439	569	569	-0.00277494	1.06881	1300	744	-0.805137	ATP-dependent RNA helicase DBP2B, putative
Tb927.8.780:mRNA-p1	Tb927.8.780:mRNA-p1	hypothetical protein, conserved	16	20.2	116.53	1025	1025	-0.00277494	1.06861	1301	5940	2.19084	hypothetical protein, conserved
Tb927.3.2690:mRNA-p1	Tb927.3.2690:mRNA-p1	AGC/RSK family serine/threonine kinase, putative	8	7.9	138.08	1261	1261	-0.00277494	1.0683	1302	6579	2.33714	AGC/RSK family serine/threonine kinase, putative
Tb927.3.3850:mRNA-p1	Tb927.3.3850:mRNA-p1	COPII coat assembly protein sec16	37	28.8	146.55	1387	1387	-0.00277494	1.06817	1303	1727	0.406431	COPII coat assembly protein sec16
Tb927.10.880:mRNA-p1	Tb927.10.880:mRNA-p1	thymidine kinase	11	35.4	50.844	455	455	-0.00277494	1.06719	1304	3136	1.26598	thymidine kinase
Tb927.5.2340:mRNA-p1	Tb927.5.2340:mRNA-p1	hypothetical protein, conserved	5	12.3	60.235	545	545	-0.00277494	1.06675	1305	6312	2.27405	hypothetical protein, conserved
Tb927.7.1870:mRNA-p1;Tb927.7.1830:mRNA-p1	Tb927.7.1870:mRNA-p1;Tb927.7.1830:mRNA-p1	hypothetical protein, conserved	7;7	30.6	40.864	366	366;366	-0.00277494	1.06462	1306	3270	1.32414	hypothetical protein, conserved
Tb927.1.2400:mRNA-p1;Tb927.1.2380:mRNA-p1;Tb927.1.2360:mRNA-p1;Tb927.1.2340:mRNA-p1	Tb927.1.2400:mRNA-p1;Tb927.1.2380:mRNA-p1;Tb927.1.2360:mRNA-p1;Tb927.1.2340:mRNA-p1	alpha tubulin	13;13;13;13	25.9	49.787	451	451;451;451;451	-0.00277494	1.06417	1307	5	-8.03012	alpha tubulin
Tb927.11.16670:mRNA-p1	Tb927.11.16670:mRNA-p1	hypothetical protein, conserved	14	31.4	63.505	570	570	-0.00277494	1.06326	1308	2602	0.992258	hypothetical protein, conserved
Tb927.5.3850:mRNA-p1	Tb927.5.3850:mRNA-p1	XRN 5-3 exonuclease N-terminus, putative	9	13.1	98.121	891	891	-0.00277494	1.063	1309	5287	2.01398	XRN 5-3 exonuclease N-terminus, putative
Tb927.8.2540:mRNA-p1	Tb927.8.2540:mRNA-p1	3-ketoacyl-CoA thiolase	33	72.6	46.244	438	438	-0.00277494	1.06247	1310	283	-2.21069	3-ketoacyl-CoA thiolase
Tb927.5.1670:mRNA-p1	Tb927.5.1670:mRNA-p1	hypothetical protein, conserved	10	34.8	37.922	348	348	-0.00277494	1.06154	1311	3959	1.59447	hypothetical protein, conserved
Tb927.5.1520:mRNA-p1	Tb927.5.1520:mRNA-p1	ATP-dependent protease ATPase subunit HslU1	35	64	52.53	475	475	-0.00277494	1.06133	1312	906	-0.534185	ATP-dependent protease ATPase subunit HslU1
Tb927.9.8820:mRNA-p1	Tb927.9.8820:mRNA-p1	hypothetical protein, conserved	56	45.2	119.55	1053	1053	-0.00277494	1.05957	1313	2367	0.850193	hypothetical protein, conserved
Tb927.5.3900:mRNA-p1	Tb927.5.3900:mRNA-p1	Galactose oxidase, central domain/Domain of unknown function (DUF4110), putative	7	12.6	82.986	744	744	-0.00277494	1.05826	1314	2510	0.933722	Galactose oxidase, central domain/Domain of unknown function (DUF4110), putative
Tb927.11.16760:mRNA-p1	Tb927.11.16760:mRNA-p1	T-complex protein 1, alpha subunit, putative	37	70.3	59.432	552	552	-0.00277494	1.05689	1315	332	-1.98581	T-complex protein 1, alpha subunit, putative
Tb927.5.1140:mRNA-p1	Tb927.5.1140:mRNA-p1	choline/ethanolamine kinase	15	35.4	70.137	628	628	-0.00277494	1.05668	1316	1224	-0.104556	choline/ethanolamine kinase
Tb927.11.13810:mRNA-p1	Tb927.11.13810:mRNA-p1	ATP- dependent RNA helicase, putative	5	12.1	62.912	556	556	-0.00277494	1.05621	1317	3802	1.5295	ATP- dependent RNA helicase, putative
Tb11.v5.0477.1-p1;Tb927.10.14560:mRNA-p1	Tb11.v5.0477.1-p1;Tb927.10.14560:mRNA-p1	TPR repeat, putative	2;2	4.1	60.725	537	537;669	-0.00277494	1.05599	1318	6678	2.34107	TPR repeat, putative
Tb927.11.15430:mRNA-p1	Tb927.11.15430:mRNA-p1	U5 small nuclear ribonucleoprotein component, putative	19	24.8	105.47	974	974	-0.00277494	1.05358	1319	2060	0.6432	U5 small nuclear ribonucleoprotein component, putative
Tb927.6.2220:mRNA-p1	Tb927.6.2220:mRNA-p1	hypothetical protein, conserved	5	48.8	14.871	129	129	-0.00277494	1.05215	1320	2938	1.1543	hypothetical protein, conserved
Tb927.7.4040:mRNA-p1	Tb927.7.4040:mRNA-p1	hypothetical protein, conserved	14	24.9	92.82	852	852	-0.00277494	1.05157	1321	4646	1.81436	hypothetical protein, conserved
Tb927.11.14020:mRNA-p1;Tb927.11.14000:mRNA-p1	Tb927.11.14020:mRNA-p1;Tb927.11.14000:mRNA-p1	nuclear RNA binding domain 2	25;23	62	30.274	279	279;262	-0.00277494	1.05085	1322	262	-2.33508	nuclear RNA binding domain 2
Tb927.11.9350:mRNA-p1	Tb927.11.9350:mRNA-p1	phosphonopyruvate decarboxylase-like protein, putative	10	32.2	42.313	397	397	-0.00277494	1.04944	1323	5273	1.99481	phosphonopyruvate decarboxylase-like protein, putative
Tb927.10.8870:mRNA-p1	Tb927.10.8870:mRNA-p1	Myosin-like coiled-coil protein, putative	12	41.7	33.851	288	288	-0.00277494	1.04935	1324	3539	1.41844	Myosin-like coiled-coil protein, putative
Tb927.10.1720:mRNA-p1	Tb927.10.1720:mRNA-p1	ATP-dependent DEAD/H RNA helicase, putative	7	13.4	66.419	596	596	-0.00277494	1.04864	1325	3575	1.43195	ATP-dependent DEAD/H RNA helicase, putative
Tb927.8.4810:mRNA-p1	Tb927.8.4810:mRNA-p1	prohibitin 1	26	64.3	31.429	277	277	-0.00277494	1.0485	1326	1469	0.147754	prohibitin 1
Tb927.11.16600:mRNA-p1	Tb927.11.16600:mRNA-p1	exosome-associated protein 2	3	16.7	31.296	294	294	-0.00277494	1.0479	1327	4912	1.88814	exosome-associated protein 2
Tb927.3.690:mRNA-p1	Tb927.3.690:mRNA-p1	CMGC/RCK protein kinase, putative	9	23.8	63.827	583	583	-0.00277494	1.04609	1328	2488	0.905731	CMGC/RCK protein kinase, putative
Tb927.8.4430:mRNA-p1	Tb927.8.4430:mRNA-p1	uridine phosphorylase	3	12.9	36.925	341	341	-0.00277494	1.04546	1329	156	-3.09072	uridine phosphorylase
Tb927.9.3990:mRNA-p1;Tb927.9.3920:mRNA-p1	Tb927.9.3990:mRNA-p1;Tb927.9.3920:mRNA-p1	ribosomal protein S7, putative	23;21	66.8	23.841	202	202;202	-0.00277494	1.04514	1330	352	-1.91778	ribosomal protein S7, putative
Tb927.10.15330:mRNA-p1;Tb11.v5.0348.1-p1	Tb927.10.15330:mRNA-p1;Tb11.v5.0348.1-p1	CYTH domain containing protein, putative	30;27	50.7	68.478	605	605;571	-0.00277494	1.04388	1331	884	-0.590392	CYTH domain containing protein, putative
Tb927.10.12820:mRNA-p1	Tb927.10.12820:mRNA-p1	hypothetical protein, conserved	34	40.6	110.24	1013	1013	-0.00277494	1.04358	1332	394	-1.75733	hypothetical protein, conserved
Tb927.6.4320:mRNA-p1	Tb927.6.4320:mRNA-p1	Protein of unknown function (DUF2817), putative	17	53.4	44.423	399	399	-0.00277494	1.04243	1333	811	-0.716903	Protein of unknown function (DUF2817), putative
Tb927.6.3720:mRNA-p1	Tb927.6.3720:mRNA-p1	hypothetical protein, conserved	4	6	75.008	670	670	-0.00277494	1.04187	1334	4159	1.64048	hypothetical protein, conserved
Tb927.7.6910:mRNA-p1	Tb927.7.6910:mRNA-p1	Phosphatidylinositol 4-phosphate 5-kinase, putative	8	15.3	92.255	823	823	-0.00277494	1.04035	1335	591	-1.17561	Phosphatidylinositol 4-phosphate 5-kinase, putative
Tb927.8.4640:mRNA-p1	Tb927.8.4640:mRNA-p1	Component of motile flagella 19	3	10.9	46.865	385	385	-0.00277494	1.03833	1336	1191	-0.165747	Component of motile flagella 19
Tb927.9.8420:mRNA-p1;Tb927.9.8070:mRNA-p1	Tb927.9.8420:mRNA-p1;Tb927.9.8070:mRNA-p1	QM-like protein	25;25	71.8	24.736	213	213;213	-0.00277494	1.03587	1337	239	-2.48392	QM-like protein
Tb927.3.1110:mRNA-p1;Tb11.v5.0589.1-p1	Tb927.3.1110:mRNA-p1;Tb11.v5.0589.1-p1	Putative intraflagellar transport protein A1	24;22	46.3	52.713	477	477;437	-0.00277494	1.03378	1338	830	-0.688895	Putative intraflagellar transport protein A1
Tb927.2.2770:mRNA-p1	Tb927.2.2770:mRNA-p1	hypothetical protein, conserved	4	50.4	13.445	125	125	-0.00277494	1.03356	1339	696	-0.943997	hypothetical protein, conserved
Tb927.11.360:mRNA-p1	Tb927.11.360:mRNA-p1	ATP-binding protein, putative	4	11.2	66.678	599	599	-0.00277494	1.03269	1340	3674	1.45512	ATP-binding protein, putative
Tb927.11.16720:mRNA-p1	Tb927.11.16720:mRNA-p1	mitotic cyclin 6	3	6.3	48.964	426	426	-0.00277494	1.03041	1341	5083	1.92237	mitotic cyclin 6
Tb927.4.3790:mRNA-p1	Tb927.4.3790:mRNA-p1	ubiquitin carboxyl-terminal hydrolase, putative	7	18.5	52.002	465	465	-0.00277494	1.03015	1342	1355	0.0139082	ubiquitin carboxyl-terminal hydrolase, putative
Tb927.11.10690:mRNA-p1	Tb927.11.10690:mRNA-p1	hypothetical protein, conserved	17	46.8	45.229	408	408	-0.00277494	1.02987	1343	828	-0.697757	hypothetical protein, conserved
Tb927.1.4310:mRNA-p1	Tb927.1.4310:mRNA-p1	Flagellum attachment zone protein 2	52	35.1	183.76	1638	1638	-0.00277494	1.02953	1344	306	-2.13493	Flagellum attachment zone protein 2
Tb927.7.1110:mRNA-p1	Tb927.7.1110:mRNA-p1	asparagine synthetase a, putative	9	34.2	39.597	351	351	-0.00277494	1.02899	1345	420	-1.67914	asparagine synthetase a, putative
Tb927.10.8630:mRNA-p1	Tb927.10.8630:mRNA-p1	Sucrase/ferredoxin-like, putative	3	13.3	27.968	255	255	-0.00277494	1.02855	1346	2255	0.744449	Sucrase/ferredoxin-like, putative
Tb927.1.3260:mRNA-p1	Tb927.1.3260:mRNA-p1	hypothetical protein, conserved	34	20.3	203.06	1886	1886	-0.00277494	1.02792	1347	1294	-0.0579122	hypothetical protein, conserved
Tb927.10.7130:mRNA-p1	Tb927.10.7130:mRNA-p1	hypothetical protein, conserved	5	7.6	83.021	746	746	-0.00277494	1.02787	1348	3366	1.32021	hypothetical protein, conserved
Tb927.7.5610:mRNA-p1	Tb927.7.5610:mRNA-p1	hypothetical protein, conserved	3	2.9	122.07	1090	1090	-0.00277494	1.02703	1349	3219	1.25472	hypothetical protein, conserved
Tb927.8.4150:mRNA-p1	Tb927.8.4150:mRNA-p1	rhomboid-like protein	2	8	33.246	300	300	-0.00277494	1.02643	1350	3383	1.32534	rhomboid-like protein
Tb927.7.7450:mRNA-p1	Tb927.7.7450:mRNA-p1	GTP-binding protein, putative	17	32.4	68.482	601	601	-0.00277494	1.02624	1351	2910	1.10699	GTP-binding protein, putative
Tb927.11.6010:mRNA-p1	Tb927.11.6010:mRNA-p1	conserved protein, unknown function	11	78	17.987	164	164	-0.00277494	1.02609	1352	2981	1.1407	conserved protein, unknown function
Tb927.6.4330:mRNA-p1	Tb927.6.4330:mRNA-p1	hypothetical protein, conserved	2	18.3	20.175	180	180	-0.00277494	1.0259	1353	3665	1.43765	hypothetical protein, conserved
Tb927.3.1240:mRNA-p1	Tb927.3.1240:mRNA-p1	Serine/threonine-protein phosphatase 2A, putative	18	61.9	36.243	323	323	-0.00277494	1.02518	1354	2331	0.783721	Serine/threonine-protein phosphatase 2A, putative
Tb927.4.1800:mRNA-p1;Tb927.4.1790:mRNA-p1	Tb927.4.1800:mRNA-p1;Tb927.4.1790:mRNA-p1	Mitochondrial ribosomal protein L3	45;45	76.7	48.691	429	429;429	-0.00277494	1.02092	1355	182	-2.89628	Mitochondrial ribosomal protein L3
Tb927.11.7214:mRNA-p1;Tb11.02.5100b.1-p1	Tb927.11.7214:mRNA-p1;Tb11.02.5100b.1-p1	hypothetical protein, conserved	4;4	11.9	63.574	553	553;553	-0.00277494	1.01888	1356	6486	2.25797	hypothetical protein, conserved
Tb927.8.6770:mRNA-p1	Tb927.8.6770:mRNA-p1	WD domain, G-beta repeat, putative	9	31.7	45.761	419	419	-0.00277494	1.01798	1357	3275	1.27107	WD domain, G-beta repeat, putative
Tb927.10.6610:mRNA-p1	Tb927.10.6610:mRNA-p1	chaperone protein DnaJ, putative	6	34.7	31.198	274	274	-0.00277494	1.01786	1358	2121	0.643261	chaperone protein DnaJ, putative
Tb927.9.7720:mRNA-p1	Tb927.9.7720:mRNA-p1	predicted tetratricopeptide repeat protein	69	52.1	152.89	1362	1362	-0.00277494	1.01732	1359	640	-1.0864	predicted tetratricopeptide repeat protein
Tb927.9.12880:mRNA-p1	Tb927.9.12880:mRNA-p1	STE20-like serine/threonine-protein kinase 2, putative	18	34.1	75.729	687	687	-0.00277494	1.01615	1360	2471	0.861488	STE20-like serine/threonine-protein kinase 2, putative
Tb927.10.10960:mRNA-p1;Tb927.10.10950:mRNA-p1;Tb927.10.10940:mRNA-p1;Tb927.10.10920:mRNA-p1;Tb927.10.10900:mRNA-p1;Tb927.10.10890:mRNA-p1;Tb11.v5.0543.1-p1;Tb927.10.10910:mRNA-p1;Tb927.10.10980:mRNA-p1;Tb927.10.10970:mRNA-p1;Tb927.10.10930:mRNA-p1	Tb927.10.10960:mRNA-p1;Tb927.10.10950:mRNA-p1;Tb927.10.10940:mRNA-p1;Tb927.10.10920:mRNA-p1;Tb927.10.10900:mRNA-p1;Tb927.10.10890:mRNA-p1;Tb11.v5.0543.1-p1;Tb927.10.10910:mRNA-p1;Tb927.10.10980:mRNA-p1;Tb927.10.10970:mRNA-p1;Tb927.10.10930:mRNA-p1	heat shock protein, putative	76;76;76;76;76;76;76;75;73;73;71	72.3	80.763	704	704;704;704;704;704;704;704;704;704;704;704	-0.00277494	1.01423	1361	38	-5.16252	heat shock protein, putative
Tb927.11.15160:mRNA-p1	Tb927.11.15160:mRNA-p1	hypothetical protein, conserved	5	14.9	40.631	376	376	-0.00277494	1.01314	1362	6487	2.25182	hypothetical protein, conserved
Tb927.9.12800:mRNA-p1	Tb927.9.12800:mRNA-p1	hypothetical protein, conserved	4	5.6	120.05	1059	1059	-0.00277494	1.01265	1363	2901	1.08976	hypothetical protein, conserved
Tb927.2.2190:mRNA-p1;Tb11.v5.0660.1-p1	Tb927.2.2190:mRNA-p1;Tb11.v5.0660.1-p1	histone deacetylase 3	9;7	18.5	75.242	685	685;620	-0.00277494	1.01189	1364	2568	0.912802	histone deacetylase 3
Tb927.10.14300:mRNA-p1	Tb927.10.14300:mRNA-p1	MEKK-related kinase 1, putative	37	48	116.11	1083	1083	-0.00277494	1.01105	1365	3423	1.32636	MEKK-related kinase 1, putative
Tb927.5.2570:mRNA-p1	Tb927.5.2570:mRNA-p1	eukaryotic translation initiation factor 3 subunit b	39	63.9	79.81	696	696	-0.00277494	1.00944	1366	693	-0.97903	eukaryotic translation initiation factor 3 subunit b
Tb927.10.350:mRNA-p1;Tb11.v5.0564.1-p1	Tb927.10.350:mRNA-p1;Tb11.v5.0564.1-p1	protein kinase PK4, putative	6;6	15.8	58.557	512	512;512	-0.00277494	1.00892	1367	2177	0.671328	protein kinase PK4, putative
Tb927.9.11490:mRNA-p1;Tb927.9.11470:mRNA-p1	Tb927.9.11490:mRNA-p1;Tb927.9.11470:mRNA-p1	60S ribosomal protein L29	9;9	52.4	16.266	145	145;145	-0.00277494	1.00602	1368	516	-1.40663	60S ribosomal protein L29
Tb927.9.8060:mRNA-p1	Tb927.9.8060:mRNA-p1	WAHD domain of WASH complex, putative	4	9.9	61.02	576	576	-0.00277494	1.00487	1369	3523	1.36368	WAHD domain of WASH complex, putative
Tb927.6.2550:mRNA-p1	Tb927.6.2550:mRNA-p1	RNA-binding protein, putative	27	40.7	82.867	755	755	-0.00277494	1.00421	1370	909	-0.591824	RNA-binding protein, putative
Tb927.7.320:mRNA-p1	Tb927.7.320:mRNA-p1	RNA-binding protein 8	5	42.2	20.27	180	180	-0.00277494	1.00376	1371	6688	2.28635	RNA-binding protein 8
Tb927.4.3590:mRNA-p1;Tb927.4.3570:mRNA-p1	Tb927.4.3590:mRNA-p1;Tb927.4.3570:mRNA-p1	translation elongation factor 1-beta, putative	10;8	52.7	24.334	226	226;226	-0.00277494	1.00337	1372	140	-3.29278	translation elongation factor 1-beta, putative
Tb927.9.6070:mRNA-p1;Tb927.10.11540:mRNA-p1	Tb927.9.6070:mRNA-p1;Tb927.10.11540:mRNA-p1	40S ribosomal protein S3, putative	23;23	79.9	24.216	214	214;214	-0.00277494	1.00275	1373	232	-2.56513	40S ribosomal protein S3, putative
Tb927.5.3700:mRNA-p1	Tb927.5.3700:mRNA-p1	hypothetical protein, conserved	5	22.9	32.239	292	292	-0.00277494	1.00269	1374	4707	1.77643	hypothetical protein, conserved
Tb927.8.1780:mRNA-p1	Tb927.8.1780:mRNA-p1	STE/STE7 protein kinase, putative	4	5.5	84.761	779	779	-0.00277494	1.00189	1375	6018	2.12985	STE/STE7 protein kinase, putative
Tb927.10.2380:mRNA-p1	Tb927.10.2380:mRNA-p1	Tetratricopeptide repeat, putative	22	32	102.45	916	916	-0.00277494	1.0005	1376	1083	-0.345447	Tetratricopeptide repeat, putative
Tb927.11.11550:mRNA-p1	Tb927.11.11550:mRNA-p1	DNA topoisomerase II alpha, putative	12	11.3	164.65	1455	1455	-0.00277494	0.996721	1377	1278	-0.107641	DNA topoisomerase II alpha, putative
Tb927.11.280:mRNA-p1	Tb927.11.280:mRNA-p1	hypothetical protein, conserved	4	6.3	71.963	648	648	-0.00277494	0.996609	1378	3013	1.12862	hypothetical protein, conserved
Tb927.6.3040:mRNA-p1	Tb927.6.3040:mRNA-p1	small GTP-binding protein Rab28, putative	3	13.3	26.019	240	240	-0.00277494	0.996429	1379	3268	1.24479	small GTP-binding protein Rab28, putative
Tb927.11.10910:mRNA-p1;Tb927.11.10790:mRNA-p1	Tb927.11.10910:mRNA-p1;Tb927.11.10790:mRNA-p1	40S ribosomal protein SA, putative	25;25	88.5	27.609	244	244;244	-0.00277494	0.99157	1380	290	-2.25054	40S ribosomal protein SA, putative
Tb927.7.3780:mRNA-p1	Tb927.7.3780:mRNA-p1	Nuclear poly(A) polymerase 2	8	13.8	74.43	687	687	-0.00277494	0.989708	1381	2203	0.673756	Nuclear poly(A) polymerase 2
Tb927.9.9210:mRNA-p1;Tb927.11.3000:mRNA-p1	Tb927.9.9210:mRNA-p1;Tb927.11.3000:mRNA-p1	60S ribosomal protein L37, putative	3;3	32.1	10.1	84	84;84	-0.00277494	0.989582	1382	945	-0.548371	60S ribosomal protein L37, putative
Tb927.11.1850:mRNA-p1;Tb11.1420:mRNA-p1;Tb11.1370.1-p1	Tb927.11.1850:mRNA-p1;Tb11.1420:mRNA-p1;Tb11.1370.1-p1	hypothetical protein, conserved	13;11;11	32.3	57.107	495	495;440;440	-0.00277494	0.989087	1383	5019	1.8596	hypothetical protein, conserved
Tb927.8.1860:mRNA-p1	Tb927.8.1860:mRNA-p1	pitrilysin-like metalloprotease	8	9.5	114.53	1030	1030	-0.00277494	0.988572	1384	1367	-0.0178307	pitrilysin-like metalloprotease
Tb927.2.5060:mRNA-p1	Tb927.2.5060:mRNA-p1	GTP binding protein, putative	8	33	44.349	394	394	-0.00277494	0.988166	1385	672	-1.04335	GTP binding protein, putative
Tb927.10.5620:mRNA-p1;Tb11.v5.0531.1-p1	Tb927.10.5620:mRNA-p1;Tb11.v5.0531.1-p1	fructose-bisphosphate aldolase, glycosomal	57;57	94.9	41.071	372	372;372	-0.00277494	0.988034	1386	13	-6.73627	fructose-bisphosphate aldolase, glycosomal
Tb927.11.2060:mRNA-p1;Tb927.11.2050:mRNA-p1	Tb927.11.2060:mRNA-p1;Tb927.11.2050:mRNA-p1	60S acidic ribosomal protein P0, putative	30;30	69.8	34.627	324	324;324	-0.00277494	0.98701	1387	171	-3.0199	60S acidic ribosomal protein P0, putative
Tb927.10.230:mRNA-p1	Tb927.10.230:mRNA-p1	proteasome subunit alpha type-5, putative	4	26	27.176	246	246	-0.00277494	0.986199	1388	692	-1.00416	proteasome subunit alpha type-5, putative
Tb927.9.4200:mRNA-p1	Tb927.9.4200:mRNA-p1	fatty acyl CoA synthetase 2	12	19.5	79.586	708	708	-0.00277494	0.986106	1389	1941	0.482754	fatty acyl CoA synthetase 2
Tb927.10.11820:mRNA-p1	Tb927.10.11820:mRNA-p1	kinetoplast ribosomal PPR-repeat containing protein 17	4	21	39.072	334	334	-0.00277494	0.984262	1390	7149	2.36266	kinetoplast ribosomal PPR-repeat containing protein 17
Tb927.5.1260:mRNA-p1	Tb927.5.1260:mRNA-p1	Sulfate transporter N-terminal domain with GLY motif/Sulfate transporter family, putative	21	37.9	62.563	573	573	-0.00277494	0.982122	1391	1148	-0.277	Sulfate transporter N-terminal domain with GLY motif/Sulfate transporter family, putative
Tb927.3.2890:mRNA-p1	Tb927.3.2890:mRNA-p1	radial spoke protein RSP10, putative	2	8.7	37.011	322	322	-0.00277494	0.981333	1392	1230	-0.178501	radial spoke protein RSP10, putative
Tb927.7.3910:mRNA-p1	Tb927.7.3910:mRNA-p1	NADH dehydrogenase (ubiquinone) 1 beta subcomplex subunit, putative	4	8.9	57.602	504	504	-0.00277494	0.981197	1393	5795	2.05661	NADH dehydrogenase (ubiquinone) 1 beta subcomplex subunit, putative
Tb927.11.10460:mRNA-p1	Tb927.11.10460:mRNA-p1	dna replication complex gins protein psf2	2	11	33.836	310	310	-0.00277494	0.979885	1394	5365	1.94435	dna replication complex gins protein psf2
Tb927.11.13780:mRNA-p1	Tb927.11.13780:mRNA-p1	profilin	5	44	16.122	150	150	-0.00277494	0.979766	1395	734	-0.926413	profilin
Tb927.10.13510:mRNA-p1	Tb927.10.13510:mRNA-p1	zinc metallopeptidase, putative	6	11.1	62.779	569	569	-0.00277494	0.97976	1396	2138	0.614963	zinc metallopeptidase, putative
Tb927.10.4980:mRNA-p1	Tb927.10.4980:mRNA-p1	ubiquitin-like protein DSK2, putative	7	43.4	32.186	302	302	-0.00277494	0.97912	1397	1193	-0.227738	ubiquitin-like protein DSK2, putative
Tb927.11.5140:mRNA-p1	Tb927.11.5140:mRNA-p1	ubiquitin carboxyl-terminal hydrolase, putative	3	12.6	34.627	309	309	-0.00277494	0.978188	1398	1579	0.175647	ubiquitin carboxyl-terminal hydrolase, putative
Tb927.10.7740:mRNA-p1	Tb927.10.7740:mRNA-p1	protein transport protein SEC23	20	36	83.308	744	744	-0.00277494	0.97803	1399	2151	0.620612	protein transport protein SEC23
Tb927.4.920:mRNA-p1	Tb927.4.920:mRNA-p1	TPR repeat, putative	4	17.4	28.089	253	253	-0.00277494	0.977451	1400	1689	0.270743	TPR repeat, putative
Tb927.8.3530:mRNA-p1	Tb927.8.3530:mRNA-p1	glycerol-3-phosphate dehydrogenase [NAD+], glycosomal	25	66.1	37.805	354	354	-0.00277494	0.977014	1401	62	-4.49804	glycerol-3-phosphate dehydrogenase [NAD+], glycosomal
Tb927.8.1990:mRNA-p1	Tb927.8.1990:mRNA-p1	peroxidoxin	19	64.6	25.631	226	226	-0.00277494	0.975918	1402	159	-3.14039	peroxidoxin
Tb927.4.2310:mRNA-p1	Tb927.4.2310:mRNA-p1	asparaginyl-tRNA synthetase, putative	12	16.6	75.462	667	667	-0.00277494	0.974399	1403	764	-0.87687	asparaginyl-tRNA synthetase, putative
Tb927.1.3180:mRNA-p1	Tb927.1.3180:mRNA-p1	40S ribosomal protein S11, putative	2	12.1	20.059	174	174	-0.00277494	0.973633	1404	275	-2.35204	40S ribosomal protein S11, putative
Tb927.10.15740:mRNA-p1	Tb927.10.15740:mRNA-p1	hypothetical protein, conserved	11	31.3	55.844	517	517	-0.00277494	0.97246	1405	2816	1.00308	hypothetical protein, conserved
Tb927.11.14220:mRNA-p1	Tb927.11.14220:mRNA-p1	hypothetical protein, conserved	19	53.7	54.405	516	516	-0.00277494	0.972296	1406	1356	-0.0522394	hypothetical protein, conserved
Tb927.11.5810:mRNA-p1	Tb927.11.5810:mRNA-p1	Surfeit locus protein 6, putative	3	25.7	22.133	206	206	-0.00277494	0.970008	1407	4157	1.56292	Surfeit locus protein 6, putative
Tb927.9.9870:mRNA-p1	Tb927.9.9870:mRNA-p1	Kinesin-13 6, putative	20	50.6	53.501	482	482	-0.00277494	0.967548	1408	1425	0.0173146	Kinesin-13 6, putative
Tb927.11.11080:mRNA-p1	Tb927.11.11080:mRNA-p1	Nucleoporin NUP149	19	75.4	149.23	1439	1439	-0.00277494	0.965667	1409	1160	-0.280547	Nucleoporin NUP149
Tb927.9.7620:mRNA-p1;Tb927.9.7590:mRNA-p1	Tb927.9.7620:mRNA-p1;Tb927.9.7590:mRNA-p1	60S ribosomal protein L11, putative	14;14	54.1	22.369	194	194;194	-0.00277494	0.965103	1410	568	-1.31173	60S ribosomal protein L11, putative
Tb927.11.3710:mRNA-p1	Tb927.11.3710:mRNA-p1	hypothetical protein, conserved	19	37.1	61.184	515	515	-0.00277494	0.964972	1411	1151	-0.29383	hypothetical protein, conserved
Tb927.5.2780:mRNA-p1	Tb927.5.2780:mRNA-p1	mitochondrial DNA polymerase beta	3	9.6	46.102	407	407	-0.00277494	0.964552	1412	1240	-0.1874	mitochondrial DNA polymerase beta
Tb927.10.11020:mRNA-p1;Tb11.v5.0547.1-p1	Tb927.10.11020:mRNA-p1	DNA mismatch repair protein MSH2, putative	25;5	32.2	105.34	951	951;316	-0.00277494	0.962448	1413	2110	0.578482	DNA mismatch repair protein MSH2, putative
Tb927.2.3030:mRNA-p1	Tb927.2.3030:mRNA-p1	ATP-dependent Clp protease subunit, heat shock protein 78 (HSP78), putative	58	63.7	90.664	812	812	-0.00277494	0.962393	1414	665	-1.08836	ATP-dependent Clp protease subunit, heat shock protein 78 (HSP78), putative
Tb927.9.5300:mRNA-p1	Tb927.9.5300:mRNA-p1	kinetoplast ribosomal PPR-repeat containing protein 16	4	22.6	31.896	274	274	-0.00277494	0.962067	1415	5983	2.08007	kinetoplast ribosomal PPR-repeat containing protein 16
Tb927.9.15460:mRNA-p1	Tb927.9.15460:mRNA-p1	calcium motive p-type ATPase, putative	38	46.2	113.97	1041	1041	-0.00277494	0.961927	1416	701	-1.01433	calcium motive p-type ATPase, putative
Tb927.10.2560:mRNA-p1	Tb927.10.2560:mRNA-p1	mitochondrial malate dehydrogenase	18	67.9	33.188	318	318	-0.00277494	0.961906	1417	1092	-0.375867	mitochondrial malate dehydrogenase
Tb927.9.7400:mRNA-p1;Tb927.9.7320:mRNA-p1;Tb927.1.5110:mRNA-p1;Tb927.1.4900:mRNA-p1;Tb927.3.560:mRNA-p1;Tb11.v5.0677.1-p1;Tb11.01.6251:mRNA-p1;Tb927.3.5820:pseudogenic_transcript-p1;Tb11.01.6250:mRNA-p1	Tb927.9.7400:mRNA-p1;Tb927.9.7320:mRNA-p1;Tb927.1.5110:mRNA-p1;Tb927.1.4900:mRNA-p1	expression site-associated gene 11 (ESAG11) protein, putative	3;3;2;2;1;1;1;1;1	7.8	41.282	371	371;371;364;372;367;368;368;372;376	-0.00277494	0.961602	1418	7149	2.33388	expression site-associated gene 11 (ESAG11) protein, putative
Tb927.11.13680:mRNA-p1	Tb927.11.13680:mRNA-p1	hypothetical protein, conserved	5	21.5	37.183	339	339	-0.00277494	0.960769	1419	3498	1.30166	hypothetical protein, conserved
Tb927.11.5700:mRNA-p1	Tb927.11.5700:mRNA-p1	hypothetical protein, conserved	11	8.7	191.27	1720	1720	-0.00277494	0.960163	1420	2448	0.785713	hypothetical protein, conserved
Tb927.10.5280:mRNA-p1;Tb11.v5.0248.1-p1	Tb927.10.5280:mRNA-p1;Tb11.v5.0248.1-p1	pre-mRNA splicing factor ATP-dependent RNA helicase, putative	5;5	7.3	98.058	880	880;880	-0.00277494	0.95825	1421	2330	0.713423	pre-mRNA splicing factor ATP-dependent RNA helicase, putative
Tb927.8.810:mRNA-p1	Tb927.8.810:mRNA-p1	radial spoke protein RSP9, putative	4	17.1	37.518	333	333	-0.00277494	0.958087	1422	786	-0.85532	radial spoke protein RSP9, putative
Tb927.10.890:mRNA-p1;Tb11.v5.0833.1-p1	Tb927.10.890:mRNA-p1	kinesin, putative	57;13	41.8	323.35	2889	2889;748	-0.00277494	0.957629	1423	5239	1.88036	kinesin, putative
Tb927.1.4690:mRNA-p1	Tb927.1.4690:mRNA-p1	Protein arginine N-methyltransferase 1 catalytic subunit	4	15.1	39.206	345	345	-0.00277494	0.957456	1424	1766	0.310536	Protein arginine N-methyltransferase 1 catalytic subunit
Tb927.3.5050:mRNA-p1	Tb927.3.5050:mRNA-p1	60S ribosomal protein L4	38	73.3	41.856	374	374	-0.00277494	0.956385	1425	195	-2.86942	60S ribosomal protein L4
Tb927.7.7430:mRNA-p1;Tb927.7.7420:mRNA-p1	Tb927.7.7430:mRNA-p1;Tb927.7.7420:mRNA-p1	ATP synthase F1, alpha subunit	18;18	35.8	63.502	584	584;584	-0.00277494	0.955591	1426	425	-1.74644	ATP synthase F1, alpha subunit
Tb11.v5.0713.1-p1;Tb927.4.190:pseudogenic_transcript-p1	Tb11.v5.0713.1-p1	retrotransposon hot spot (RHS) protein, putative	13;0	21.1	78.342	688	688;209	-0.00277494	0.955356	1427	376	-1.92418	retrotransposon hot spot (RHS) protein, putative
Tb927.10.5020:mRNA-p1	Tb927.10.5020:mRNA-p1	Eukaryotic translation initiation factor 4E type 5	8	57.9	21.98	195	195	-0.00277494	0.955294	1428	1717	0.265894	Eukaryotic translation initiation factor 4E type 5
Tb927.10.14840:mRNA-p1;Tb927.10.14830:mRNA-p1;Tb927.10.14820:mRNA-p1	Tb927.10.14840:mRNA-p1;Tb927.10.14830:mRNA-p1;Tb927.10.14820:mRNA-p1	Mitochondrial ADP/ATP carrier protein 5a	18;18;18	50.8	34.074	307	307;307;307	-0.00277494	0.954362	1429	452	-1.66061	Mitochondrial ADP/ATP carrier protein 5a
Tb927.8.1550:mRNA-p1	Tb927.8.1550:mRNA-p1	paraflagellar rod component, putative	17	28	88.178	778	778	-0.00277494	0.953414	1430	331	-2.11111	paraflagellar rod component, putative
Tb927.2.3800:mRNA-p1	Tb927.2.3800:mRNA-p1	guide RNA associated protein 1	14	34.3	55.46	492	492	-0.00277494	0.95336	1431	1281	-0.159753	guide RNA associated protein 1
Tb927.5.310:mRNA-p1;Tb11.v5.0208.1-p1	Tb927.5.310:mRNA-p1;Tb11.v5.0208.1-p1	invariant surface glycoprotein, putative	4;2	10.8	44.533	407	407;439	-0.00277494	0.953297	1432	1487	0.0543732	invariant surface glycoprotein, putative
Tb927.10.14760:mRNA-p1	Tb927.10.14760:mRNA-p1	clathrin light chain, putative	5	21.7	20.51	189	189	-0.00277494	0.953243	1433	915	-0.647195	clathrin light chain, putative
Tb927.10.2990:mRNA-p1;Tb11.v5.1039.1-p1	Tb927.10.2990:mRNA-p1;Tb11.v5.1039.1-p1	nuclear cap binding complex subunit CBP110	17;15	20.2	110.49	1004	1004;911	-0.00277494	0.952951	1434	2432	0.762098	nuclear cap binding complex subunit CBP110
Tb927.8.2240:mRNA-p1	Tb927.8.2240:mRNA-p1	Tryptophanyl-tRNA synthetase 2	5	14.2	52.902	473	473	-0.00277494	0.952842	1435	5100	1.82945	Tryptophanyl-tRNA synthetase 2
Tb927.10.12990:mRNA-p1	Tb927.10.12990:mRNA-p1	predicted ankyrin repeat family protein	6	27	32.826	296	296	-0.00277494	0.952707	1436	3530	1.29761	predicted ankyrin repeat family protein
Tb927.10.6310:mRNA-p1;Tb11.v5.0275.1-p1	Tb927.10.6310:mRNA-p1;Tb11.v5.0275.1-p1	major vault protein, putative	77;77	75.9	96.198	862	862;862	-0.00277494	0.9508	1437	1062	-0.436276	major vault protein, putative
Tb927.9.11600:mRNA-p1	Tb927.9.11600:mRNA-p1	glycosomal membrane protein	3	13.7	25.975	241	241	-0.00277494	0.95035	1438	754	-0.931427	glycosomal membrane protein
Tb927.9.4900:mRNA-p1	Tb927.9.4900:mRNA-p1	condensin subunit 1, putative	9	8.9	141.11	1258	1258	-0.00277494	0.949149	1439	3295	1.19521	condensin subunit 1, putative
Tb927.9.2620:mRNA-p1	Tb927.9.2620:mRNA-p1	Domain of unknown function (DUF4460), putative	7	16	76.723	676	676	-0.00277494	0.948524	1440	6656	2.20859	Domain of unknown function (DUF4460), putative
Tb927.9.11880:mRNA-p1	Tb927.9.11880:mRNA-p1	Mitochondrial SSU ribosomal protein, putative	4	13	51.045	440	440	-0.00277494	0.948309	1441	5299	1.87865	Mitochondrial SSU ribosomal protein, putative
Tb927.11.8870:mRNA-p1	Tb927.11.8870:mRNA-p1	DEAD-box ATP-dependent RNA helicase, mitochondrial	11	29.3	60.659	546	546	-0.00277494	0.948048	1442	3518	1.28668	DEAD-box ATP-dependent RNA helicase, mitochondrial
Tb927.10.11640:mRNA-p1;Tb11.v5.1013.1-p1	Tb927.10.11640:mRNA-p1;Tb11.v5.1013.1-p1	Protein prenyltransferase alpha subunit repeat, putative	6;6	14.7	56.414	491	491;491	-0.00277494	0.947084	1443	4019	1.47777	Protein prenyltransferase alpha subunit repeat, putative
Tb927.5.2680:mRNA-p1	Tb927.5.2680:mRNA-p1	hypothetical protein, conserved	5	9.2	88.101	751	751	-0.00277494	0.946658	1444	3321	1.20155	hypothetical protein, conserved
Tb927.11.4400:mRNA-p1	Tb927.11.4400:mRNA-p1	hypothetical protein, conserved	7	11.3	71.914	646	646	-0.00277494	0.944142	1445	5327	1.88225	hypothetical protein, conserved
Tb927.6.4180:mRNA-p1	Tb927.6.4180:mRNA-p1	FUN14 family, putative	2	24.2	16.327	149	149	-0.00277494	0.942793	1446	3866	1.41877	FUN14 family, putative
Tb927.9.14370:mRNA-p1;Tb927.8.6180:mRNA-p1	Tb927.9.14370:mRNA-p1;Tb927.8.6180:mRNA-p1	60S ribosomal protein L26, putative	14;14	58.7	16.454	143	143;143	-0.00277494	0.941263	1447	879	-0.71913	60S ribosomal protein L26, putative
Tb927.8.2230:mRNA-p1	Tb927.8.2230:mRNA-p1	Checkpoint protein HUS1, putative	2	11.5	37.144	340	340	-0.00277494	0.940587	1448	5167	1.83527	Checkpoint protein HUS1, putative
Tb927.6.1730:mRNA-p1;Tb11.v5.0892.1-p1	Tb927.6.1730:mRNA-p1;Tb11.v5.0892.1-p1	hypothetical protein, conserved	53;34	37.8	139.22	1276	1276;803	-0.00277494	0.939351	1449	1545	0.0925492	hypothetical protein, conserved
Tb927.11.3360:mRNA-p1	Tb927.11.3360:mRNA-p1	Component of motile flagella 22	29	37.6	102.85	909	909	-0.00277494	0.938043	1450	1290	-0.168682	Component of motile flagella 22
Tb927.11.2690:mRNA-p1	Tb927.11.2690:mRNA-p1	Succinyl-CoA:3-ketoacid coenzyme A transferase, mitochondrial	3	10.8	53.096	493	493	-0.00277494	0.937013	1451	948	-0.614089	Succinyl-CoA:3-ketoacid coenzyme A transferase, mitochondrial
Tb11.v5.0638.1-p1;Tb927.10.1050:mRNA-p1;Tb927.10.1040:mRNA-p1	Tb11.v5.0638.1-p1;Tb927.10.1050:mRNA-p1;Tb927.10.1040:mRNA-p1	serine carboxypeptidase III precursor, putative	2;2;1	6.9	51.565	463	463;466;464	-0.00277494	0.93611	1452	933	-0.638092	serine carboxypeptidase III precursor, putative
Tb927.6.3480:mRNA-p1;Tb11.v5.0714.1-p1	Tb927.6.3480:mRNA-p1;Tb11.v5.0714.1-p1	RNA-binding protein, putative	2;1	6.3	38.06	347	347;242	-0.00277494	0.935847	1453	4851	1.73925	RNA-binding protein, putative
Tb927.10.14420:mRNA-p1	Tb927.10.14420:mRNA-p1	Serine/threonine-protein kinase NEK16, putative	13	10.3	166.77	1506	1506	-0.00277494	0.935397	1454	5914	2.02411	Serine/threonine-protein kinase NEK16, putative
Tb927.10.3780:mRNA-p1	Tb927.10.3780:mRNA-p1	hypothetical protein, conserved	27	37.2	111.05	1022	1022	-0.00277494	0.934799	1455	3081	1.08238	hypothetical protein, conserved
Tb927.6.4520:mRNA-p1	Tb927.6.4520:mRNA-p1	Tumour suppressor, Mitostatin, putative	12	30.3	52.589	436	436	-0.00277494	0.934659	1456	1163	-0.324159	Tumour suppressor, Mitostatin, putative
Tb927.11.3550:mRNA-p1	Tb927.11.3550:mRNA-p1	XPA-interacting protein, putative	6	27.9	31.803	290	290	-0.00277494	0.934302	1457	4217	1.53322	XPA-interacting protein, putative
Tb927.2.4710:mRNA-p1	Tb927.2.4710:mRNA-p1	RNA-binding protein, putative	15	45.4	49.983	441	441	-0.00277494	0.933957	1458	533	-1.45178	RNA-binding protein, putative
Tb927.11.15860:mRNA-p1;Tb927.11.15840:mRNA-p1	Tb927.11.15860:mRNA-p1;Tb927.11.15840:mRNA-p1	L-Lysine transport protein, putative	5;5	10.8	50.086	462	462;462	-0.00277494	0.93221	1459	2921	1.00148	L-Lysine transport protein, putative
Tb927.9.5730:mRNA-p1	Tb927.9.5730:mRNA-p1	nucleosome assembly protein-like protein	7	19.2	47.584	422	422	-0.00277494	0.930982	1460	849	-0.782132	nucleosome assembly protein-like protein
Tb927.1.1700:mRNA-p1	Tb927.1.1700:mRNA-p1	AATF protein, putative	4	9.7	55.093	493	493	-0.00277494	0.930832	1461	3778	1.37067	AATF protein, putative
Tb927.10.9650:mRNA-p1	Tb927.10.9650:mRNA-p1	Nucleoporin NUP152	9	7.3	152.97	1406	1406	-0.00277494	0.930321	1462	1358	-0.10646	Nucleoporin NUP152
Tb927.8.6980:mRNA-p1	Tb927.8.6980:mRNA-p1	Flagellum attachment zone protein 14	18	24.2	95.057	833	833	-0.00277494	0.929137	1463	1482	0.0186157	Flagellum attachment zone protein 14
Tb927.9.7150:mRNA-p1	Tb927.9.7150:mRNA-p1	RNA pseudouridylate synthase protein, putative	4	4.9	138.1	1254	1254	-0.00277494	0.927906	1464	6965	2.25021	RNA pseudouridylate synthase protein, putative
Tb927.11.6410:mRNA-p1	Tb927.11.6410:mRNA-p1	hypothetical protein, conserved	11	6.9	162.5	1454	1454	-0.00277494	0.927654	1465	3793	1.37244	hypothetical protein, conserved
Tb927.7.1650:mRNA-p1	Tb927.7.1650:mRNA-p1	hypothetical protein, conserved	3	6.2	84.058	746	746	-0.00277494	0.926056	1466	4941	1.75292	hypothetical protein, conserved
Tb927.11.11920:mRNA-p1	Tb927.11.11920:mRNA-p1	molybdenum cofactor biosynthesis protein, putative	5	8.1	85.372	775	775	-0.00277494	0.925528	1467	4490	1.61385	molybdenum cofactor biosynthesis protein, putative
Tb927.6.5080:mRNA-p1	Tb927.6.5080:mRNA-p1	Protein of unknown function (DUF3808), putative	21	32.7	65.003	566	566	-0.00277494	0.924427	1468	1802	0.295747	Protein of unknown function (DUF3808), putative
Tb927.4.2730:mRNA-p1	Tb927.4.2730:mRNA-p1	kinesin, putative	6	9.6	88.823	803	803	-0.00277494	0.924385	1469	4265	1.53771	kinesin, putative
Tb927.6.1180:mRNA-p1	Tb927.6.1180:mRNA-p1	hypothetical protein, conserved	55	51.1	141.36	1271	1271	-0.00277494	0.923013	1470	5210	1.82547	hypothetical protein, conserved
Tb927.10.12840:mRNA-p1	Tb927.10.12840:mRNA-p1	mitochondrial carrier protein	10	38.5	33.131	304	304	-0.00277494	0.922844	1471	946	-0.636885	mitochondrial carrier protein
Tb927.11.1620:mRNA-p1	Tb927.11.1620:mRNA-p1	hypothetical protein, conserved	3	24.5	21.598	192	192	-0.00277494	0.92226	1472	2836	0.94608	hypothetical protein, conserved
Tb927.11.9470:mRNA-p1	Tb927.11.9470:mRNA-p1	ADP-ribosylation factor GTPase activating protein, putative	8	30.3	37.113	353	353	-0.00277494	0.919779	1473	1590	0.110269	ADP-ribosylation factor GTPase activating protein, putative
Tb927.7.2980:mRNA-p1;Tb927.7.3020:mRNA-p1	Tb927.7.2980:mRNA-p1;Tb927.7.3020:mRNA-p1	Nitroreductase family, putative	7;5	47.9	21.242	190	190;190	-0.00277494	0.919679	1474	345	-2.09507	Nitroreductase family, putative
Tb927.10.14390:mRNA-p1	Tb927.10.14390:mRNA-p1	Histone chaperone Rttp106-like, putative	10	15.1	60.759	555	555	-0.00277494	0.917876	1475	1215	-0.279759	Histone chaperone Rttp106-like, putative
Tb927.11.3480:mRNA-p1	Tb927.11.3480:mRNA-p1	Sin-like protein conserved region, putative	11	20.7	78.606	711	711	-0.00277494	0.917016	1476	2865	0.956842	Sin-like protein conserved region, putative
Tb927.8.4330:mRNA-p1	Tb927.8.4330:mRNA-p1	small GTP-binding protein Rab11	10	54.2	23.527	216	216	-0.00277494	0.916382	1477	709	-1.05881	small GTP-binding protein Rab11
Tb927.11.1420:mRNA-p1	Tb927.11.1420:mRNA-p1	hypothetical protein, conserved	27	35.6	94.838	860	860	-0.00277494	0.916173	1478	1236	-0.257968	hypothetical protein, conserved
Tb927.5.3270:mRNA-p1	Tb927.5.3270:mRNA-p1	Autophagy protein Apg6, putative	7	10.8	90.622	833	833	-0.00277494	0.914827	1479.5	4341	1.55292	Autophagy protein Apg6, putative
Tb927.6.2250:mRNA-p1	Tb927.6.2250:mRNA-p1	rac serine-threonine kinase, putative	7	24.2	51.889	458	458	-0.00277494	0.914827	1479.5	1374	-0.106728	rac serine-threonine kinase, putative
Tb927.6.1190:mRNA-p1	Tb927.6.1190:mRNA-p1	Plus-3 domain/Zinc finger, C3HC4 type (RING finger), putative	4	17	34.601	294	294	-0.00277494	0.91311	1481	5896	1.99316	Plus-3 domain/Zinc finger, C3HC4 type (RING finger), putative
Tb927.1.5030:mRNA-p1	Tb927.1.5030:mRNA-p1	leucine-rich repeat protein (LRRP), putative	7	11.2	80.773	735	735	-0.00277494	0.909902	1482	2319	0.645957	leucine-rich repeat protein (LRRP), putative
Tb927.6.3890:mRNA-p1	Tb927.6.3890:mRNA-p1	replication factor C, subunit 2, putative	18	53.3	38.809	347	347	-0.00277494	0.909308	1483	1957	0.400125	replication factor C, subunit 2, putative
Tb927.3.970:mRNA-p1	Tb927.3.970:mRNA-p1	Mitochondrial SSU ribosomal protein, putative	4	14.9	39.639	370	370	-0.00277494	0.909044	1484	4001	1.43087	Mitochondrial SSU ribosomal protein, putative
Tb927.6.3590.2:mRNA-p1;Tb927.6.3590.1:mRNA-p1	Tb927.6.3590.2:mRNA-p1;Tb927.6.3590.1:mRNA-p1	hypothetical protein, conserved	7;4	9.3	123.9	1111	1111;691	-0.00277494	0.908938	1485	4192	1.49718	hypothetical protein, conserved
Tb927.3.3590:mRNA-p1	Tb927.3.3590:mRNA-p1	U3 small nucleolar ribonucleoprotein protein MPP10, putative	6	15.9	75.271	672	672	-0.00277494	0.9084	1486	2647	0.832924	U3 small nucleolar ribonucleoprotein protein MPP10, putative
Tb927.9.12650:mRNA-p1;Tb11.v5.0675.1-p1	Tb927.9.12650:mRNA-p1	ubiquitin-activating enzyme E1, putative	54;15	46	134.65	1214	1214;331	-0.00277494	0.908335	1487	150	-3.30937	ubiquitin-activating enzyme E1, putative
Tb927.4.1150:mRNA-p1	Tb927.4.1150:mRNA-p1	hypothetical protein, conserved	16	31.2	83.151	741	741	-0.00277494	0.908086	1488	3221	1.11413	hypothetical protein, conserved
Tb927.5.1320:mRNA-p1	Tb927.5.1320:mRNA-p1	Kinetochore interacting protein 2	19	23.6	91.138	817	817	-0.00277494	0.905766	1489	3183	1.09604	Kinetochore interacting protein 2
Tb927.10.11130:mRNA-p1	Tb927.10.11130:mRNA-p1	SET domain containing protein, putative	9	10.6	107.62	977	977	-0.00277494	0.90508	1490	4414	1.56677	SET domain containing protein, putative
Tb927.11.3510:mRNA-p1	Tb927.11.3510:mRNA-p1	hypothetical protein, conserved	38	47.9	91.938	850	850	-0.00277494	0.902807	1491	1439	-0.0512137	hypothetical protein, conserved
Tb927.10.14780:mRNA-p1	Tb927.10.14780:mRNA-p1	Canertinib-binding protein kinase 1	12	42.6	31.375	284	284	-0.00277494	0.902557	1492	875	-0.769893	Canertinib-binding protein kinase 1
Tb927.11.2650:mRNA-p1	Tb927.11.2650:mRNA-p1	heat shock protein 84, putative	59	68.3	84.2	753	753	-0.00277494	0.902315	1493	169	-3.14312	heat shock protein 84, putative
Tb927.7.5750:mRNA-p1	Tb927.7.5750:mRNA-p1	Anaphase promoting complex-associated Protein AP2	17	19.5	116.49	1063	1063	-0.00277494	0.901605	1494	4998	1.74217	Anaphase promoting complex-associated Protein AP2
Tb927.9.8180:mRNA-p1	Tb927.9.8180:mRNA-p1	hypothetical protein, conserved	22	40.3	70.844	642	642	-0.00277494	0.901363	1495	2124	0.506638	hypothetical protein, conserved
Tb927.11.4320:mRNA-p1	Tb927.11.4320:mRNA-p1	Uncharacterized ACR, COG1678, putative	18	55.8	51.878	475	475	-0.00277494	0.900442	1496	1436	-0.0590544	Uncharacterized ACR, COG1678, putative
Tb927.9.6350:mRNA-p1	Tb927.9.6350:mRNA-p1	inositol-1(or 4)-monophosphatase, putative	9	35.7	39.976	364	364	-0.00277494	0.899877	1497	2537	0.761049	inositol-1(or 4)-monophosphatase, putative
Tb927.9.13740:mRNA-p1;Tb927.9.13710:mRNA-p1;Tb927.9.13680:mRNA-p1;Tb927.9.13655:mRNA-p1;Tb927.9.13650:mRNA-p1	Tb927.9.13740:mRNA-p1;Tb927.9.13710:mRNA-p1;Tb927.9.13680:mRNA-p1;Tb927.9.13655:mRNA-p1;Tb927.9.13650:mRNA-p1	ADP-ribosylation factor, putative	14;14;14;14;14	69.8	20.624	182	182;182;182;182;182	-0.00277494	0.899712	1498	321	-2.22239	ADP-ribosylation factor, putative
Tb927.4.4910.2:mRNA-p1;Tb927.4.4910.1:mRNA-p1	Tb927.4.4910.2:mRNA-p1;Tb927.4.4910.1:mRNA-p1	3,2-trans-enoyl-CoA isomerase, mitochondrial precursor, putative	8;8	30.5	45.333	400	400;470	-0.00277494	0.897929	1499	1589	0.0841187	3,2-trans-enoyl-CoA isomerase, mitochondrial precursor, putative
Tb927.10.370:mRNA-p1	Tb927.10.370:mRNA-p1	calcineurin B subunit, putative	3	31.8	19.872	179	179	-0.00277494	0.89727	1500	4718	1.65321	calcineurin B subunit, putative
Tb927.8.7390:mRNA-p1;Tb927.4.5030:mRNA-p1	Tb927.8.7390:mRNA-p1;Tb927.4.5030:mRNA-p1	protein phosphatase 1	4;3	15.6	39.294	346	346;346	-0.00277494	0.896708	1501	2186	0.542369	protein phosphatase 1
Tb927.11.1540:mRNA-p1	Tb927.11.1540:mRNA-p1	isovaleryl-CoA dehydrogenase	4	11.7	44.799	411	411	-0.00277494	0.8966	1502	3391	1.17483	isovaleryl-CoA dehydrogenase
Tb927.3.760:mRNA-p1	Tb927.3.760:mRNA-p1	hypothetical protein, conserved	6	11.1	60.033	550	550	-0.00277494	0.895989	1503	3213	1.09608	hypothetical protein, conserved
Tb927.9.3130:mRNA-p1	Tb927.9.3130:mRNA-p1	hypothetical protein, conserved	2	4.8	62.877	566	566	-0.00277494	0.895727	1504	3298	1.13279	hypothetical protein, conserved
Tb927.10.12330:mRNA-p1	Tb927.10.12330:mRNA-p1	zinc finger protein family member, putative	13	45.5	22.365	202	202	-0.00277494	0.89571	1505	1537	0.0303537	zinc finger protein family member, putative
Tb927.10.6840:mRNA-p1	Tb927.10.6840:mRNA-p1	hypothetical protein, conserved	3	16.6	34.255	295	295	-0.00277494	0.895435	1506	2071	0.459606	hypothetical protein, conserved
Tb927.10.15360:mRNA-p1	Tb927.10.15360:mRNA-p1	hypothetical protein, conserved	38	21.4	191.99	1769	1769	-0.00277494	0.895333	1507	1456	-0.0496691	hypothetical protein, conserved
Tb927.11.12830:mRNA-p1	Tb927.11.12830:mRNA-p1	acyl-CoA binding protein, putative	4	6.4	84.782	778	778	-0.00277494	0.894892	1508	3924	1.37969	acyl-CoA binding protein, putative
Tb927.1.1560:mRNA-p1;Tb11.v5.0464.1-p1	Tb927.1.1560:mRNA-p1;Tb11.v5.0464.1-p1	vesicular-fusion protein nsf, putative	45;45	55.4	79.953	725	725;725	-0.00277494	0.894861	1509	774	-0.963187	vesicular-fusion protein nsf, putative
Tb927.3.3520:mRNA-p1	Tb927.3.3520:mRNA-p1	Present in the outer mitochondrial membrane proteome 25	3	7.3	47.641	427	427	-0.00277494	0.894024	1510	3788	1.32689	Present in the outer mitochondrial membrane proteome 25
Tb927.5.1580:mRNA-p1	Tb927.5.1580:mRNA-p1	zinc finger CCCH domain containing protein 13	15	36	60.305	566	566	-0.00277494	0.892098	1511	2317	0.616754	zinc finger CCCH domain containing protein 13
Tb927.5.1640:mRNA-p1	Tb927.5.1640:mRNA-p1	hypothetical protein, conserved	33	51.6	73.716	663	663	-0.00277494	0.891666	1512	3871	1.35625	hypothetical protein, conserved
Tb927.10.3200:mRNA-p1	Tb927.10.3200:mRNA-p1	U2 splicing auxiliary factor, putative	10	46.2	29.114	247	247	-0.00277494	0.889927	1513	1186	-0.351308	U2 splicing auxiliary factor, putative
Tb927.6.2090:mRNA-p1	Tb927.6.2090:mRNA-p1	pdz domain containing protein, putative	4	5.5	78.295	710	710	-0.00277494	0.889869	1514	981	-0.62604	pdz domain containing protein, putative
Tb927.10.14240:mRNA-p1;Tb11.v5.0859.1-p1	Tb927.10.14240:mRNA-p1;Tb11.v5.0859.1-p1	N-myristoyltransferase	4;3	15.5	50.528	446	446;378	-0.00277494	0.88751	1515	1248	-0.2797	N-myristoyltransferase
Tb927.10.7940:mRNA-p1	Tb927.10.7940:mRNA-p1	methyltransferase, putative	3	9.7	40.895	370	370	-0.00277494	0.887416	1516	3908	1.36616	methyltransferase, putative
Tb927.9.4050:mRNA-p1	Tb927.9.4050:mRNA-p1	Ring finger domain/Zn-finger in ubiquitin-hydrolases and other protein, putative	4	9.8	61.687	551	551	-0.00277494	0.885657	1517	4938	1.70271	Ring finger domain/Zn-finger in ubiquitin-hydrolases and other protein, putative
Tb927.3.1710:mRNA-p1	Tb927.3.1710:mRNA-p1	mitochondrial ribosomal protein l24	3	13.5	43.986	378	378	-0.00277494	0.884734	1518	4719	1.63631	mitochondrial ribosomal protein l24
Tb927.11.3970:mRNA-p1	Tb927.11.3970:mRNA-p1	hypothetical protein, conserved	11	24.7	78.028	729	729	-0.00277494	0.884567	1519	1333	-0.188445	hypothetical protein, conserved
Tb927.7.1190:mRNA-p1	Tb927.7.1190:mRNA-p1	regulator of chromosome condensation, putative	9	11.1	123.85	1152	1152	-0.00277494	0.883961	1520	2525	0.732212	regulator of chromosome condensation, putative
Tb927.11.6160:mRNA-p1	Tb927.11.6160:mRNA-p1	eukaryotic release factor 3, putative	55	61.6	76.914	698	698	-0.00277494	0.883368	1521	1021	-0.575037	eukaryotic release factor 3, putative
Tb927.11.720:mRNA-p1;Tb11.0840:mRNA-p1	Tb927.11.720:mRNA-p1;Tb11.0840:mRNA-p1	hypothetical protein, conserved	5;4	23.1	30.18	264	264;261	-0.00277494	0.883301	1522	535	-1.50836	hypothetical protein, conserved
Tb927.8.4540:mRNA-p1	Tb927.8.4540:mRNA-p1	PAB1-binding protein , putative	13	33.5	59.599	550	550	-0.00277494	0.882939	1523	669	-1.18684	PAB1-binding protein , putative
Tb927.11.1630:mRNA-p1	Tb927.11.1630:mRNA-p1	LSU ribosomal protein, mitochondrial, putative	5	7.8	93.434	831	831	-0.00277494	0.88249	1524	5129	1.75081	LSU ribosomal protein, mitochondrial, putative
Tb927.9.15400:mRNA-p1	Tb927.9.15400:mRNA-p1	ankyrin-repeat protein, putative	28	10.5	334.35	3048	3048	-0.00277494	0.88152	1525	4030	1.40197	ankyrin-repeat protein, putative
Tb927.9.13330:mRNA-p1	Tb927.9.13330:mRNA-p1	hypothetical protein, conserved	11	10.4	125.27	1150	1150	-0.00277494	0.881479	1526	3476	1.18767	hypothetical protein, conserved
Tb927.10.12410:mRNA-p1	Tb927.10.12410:mRNA-p1	hypothetical protein, conserved	2	11.4	24.659	228	228	-0.00277494	0.879983	1527	1043	-0.549961	hypothetical protein, conserved
Tb927.10.8190:mRNA-p1	Tb927.10.8190:mRNA-p1	T-complex protein 1, theta subunit, putative	30	67.2	58.081	537	537	-0.00277494	0.879213	1528	276	-2.4689	T-complex protein 1, theta subunit, putative
Tb927.5.3090:mRNA-p1	Tb927.5.3090:mRNA-p1	Mitochondrial ATP synthase subunit, putative	3	43.6	11.655	101	101	-0.00277494	0.874305	1529	3720	1.28271	Mitochondrial ATP synthase subunit, putative
Tb927.11.16790:mRNA-p1	Tb927.11.16790:mRNA-p1	mitogen-activated protein kinase	3	4.9	72.143	657	657	-0.00277494	0.874264	1530	4391	1.52102	mitogen-activated protein kinase
Tb927.10.10880:mRNA-p1	Tb927.10.10880:mRNA-p1	ATP-binding cassette sub-family F member 1, putative	14	23.2	77.697	684	684	-0.00277494	0.87329	1531	1150	-0.41284	ATP-binding cassette sub-family F member 1, putative
Tb927.9.5410:mRNA-p1	Tb927.9.5410:mRNA-p1	hypothetical protein, conserved	5	21.9	34.163	297	297	-0.00277494	0.872513	1532	1632	0.0912248	hypothetical protein, conserved
Tb927.3.1170:mRNA-p1	Tb927.3.1170:mRNA-p1	TAP42-like family, putative	5	19.9	45.363	397	397	-0.00277494	0.871205	1533	3253	1.08541	TAP42-like family, putative
Tb927.10.8030:mRNA-p1	Tb927.10.8030:mRNA-p1	Mitochondrial ATP synthase subunit 5	12	45.5	28.834	255	255	-0.00277494	0.86973	1534	1335	-0.200459	Mitochondrial ATP synthase subunit 5
Tb927.11.4900:mRNA-p1	Tb927.11.4900:mRNA-p1	WD40/YVTN repeat-like-containing protein	24	50.4	61.857	560	560	-0.00277494	0.868878	1535	1022	-0.586843	WD40/YVTN repeat-like-containing protein
Tb927.11.10760:mRNA-p1	Tb927.11.10760:mRNA-p1	kinesin-D	19	34	69.884	617	617	-0.00277494	0.866033	1536	769	-0.998123	kinesin-D
Tb927.7.5820:mRNA-p1	Tb927.7.5820:mRNA-p1	Monooxygenase, putative	8	18.3	55.086	515	515	-0.00277494	0.865876	1537	2365	0.621723	Monooxygenase, putative
Tb927.9.5890:mRNA-p1	Tb927.9.5890:mRNA-p1	solanesyl-diphosphate synthase, putative	12	48.2	39.253	359	359	-0.00277494	0.86549	1538	1827	0.248421	solanesyl-diphosphate synthase, putative
Tb927.4.4160:mRNA-p1	Tb927.4.4160:mRNA-p1	mitochondrial RNA binding protein	13	14.7	100.4	896	896	-0.00277494	0.864952	1539	3290	1.09609	mitochondrial RNA binding protein
Tb927.11.6590:mRNA-p1;Tb11.v5.0360.1-p1	Tb927.11.6590:mRNA-p1	metallo-peptidase, Clan MF, Family M17	11;3	31.5	55.359	521	521;216	-0.00277494	0.864723	1540	274	-2.49068	metallo-peptidase, Clan MF, Family M17
Tb927.11.2380:mRNA-p1	Tb927.11.2380:mRNA-p1	phosphoglycerate kinase, putative	16	19.5	100.85	913	913	-0.00277494	0.863451	1541	2294	0.573999	phosphoglycerate kinase, putative
Tb927.11.3730:mRNA-p1	Tb927.11.3730:mRNA-p1	leucyl-tRNA synthetase, putative	17	22.1	121.82	1074	1074	-0.00277494	0.863449	1542	442	-1.80268	leucyl-tRNA synthetase, putative
Tb927.10.5920:mRNA-p1	Tb927.10.5920:mRNA-p1	hypothetical protein, conserved	14	21.5	85.743	791	791	-0.00277494	0.862993	1543	3899	1.33737	hypothetical protein, conserved
Tb11.02.5420b.1-p1;Tb11.02.5420:mRNA-p1	Tb11.02.5420b.1-p1;Tb11.02.5420:mRNA-p1	NADPH-cytochrome p450 reductase, putative	3;3	7.3	69.959	631	631;631	-0.00277494	0.86281	1544	978	-0.658766	NADPH-cytochrome p450 reductase, putative
Tb927.8.3100:mRNA-p1	Tb927.8.3100:mRNA-p1	coronin, putative	13	29.5	54.719	499	499	-0.00277494	0.860232	1545	782	-0.982366	coronin, putative
Tb927.11.12230:mRNA-p1	Tb927.11.12230:mRNA-p1	ATP-dependent protease ATPase subunit HslU2	26	54.4	54.897	496	496	-0.00277494	0.859841	1546	1199	-0.366709	ATP-dependent protease ATPase subunit HslU2
Tb927.10.12940:mRNA-p1	Tb927.10.12940:mRNA-p1	predicted zinc finger protein	10	40.7	34.477	324	324	-0.00277494	0.859612	1547	1316	-0.233314	predicted zinc finger protein
Tb927.10.3330:mRNA-p1	Tb927.10.3330:mRNA-p1	DDRGK domain containing protein, putative	4	14	40.092	349	349	-0.00277494	0.859562	1548	3214	1.05396	DDRGK domain containing protein, putative
Tb927.9.8950:mRNA-p1	Tb927.9.8950:mRNA-p1	metallo- peptidase, Clan M- Family M48	11	32.6	48.904	427	427	-0.00277494	0.859379	1549	647	-1.2595	metallo- peptidase, Clan M- Family M48
Tb927.11.5300:mRNA-p1	Tb927.11.5300:mRNA-p1	Kinesin-13 3, putative	27	54.6	62.524	566	566	-0.00277494	0.858545	1550	1156	-0.423127	Kinesin-13 3, putative
Tb927.6.4380:mRNA-p1	Tb927.6.4380:mRNA-p1	Protein of unknown function (DUF544), putative	4	15.6	46.522	422	422	-0.00277494	0.857506	1551	2357	0.603753	Protein of unknown function (DUF544), putative
Tb927.9.3360:mRNA-p1	Tb927.9.3360:mRNA-p1	N-acetyltransferase, putative	4	14.6	39.673	356	356	-0.00277494	0.856998	1552	5673	1.86998	N-acetyltransferase, putative
Tb927.7.3540:mRNA-p1	Tb927.7.3540:mRNA-p1	hypothetical protein, conserved	6	27.7	29.572	271	271	-0.00277494	0.852548	1553	2236	0.525862	hypothetical protein, conserved
Tb927.10.14530:mRNA-p1	Tb927.10.14530:mRNA-p1	19S proteasome non-atpase subunit 8	6	25.2	42.35	381	381	-0.00277494	0.852167	1554	1416	-0.134165	19S proteasome non-atpase subunit 8
Tb927.11.6200:mRNA-p1;Tb927.11.6180:mRNA-p1	Tb927.11.6200:mRNA-p1;Tb927.11.6180:mRNA-p1	60S ribosomal protein L28, putative	11;11	43.8	16.861	146	146;146	-0.00277494	0.852143	1555	483	-1.68682	60S ribosomal protein L28, putative
Tb927.9.6880:mRNA-p1	Tb927.9.6880:mRNA-p1	cAMP-specific phosphodiesterase, putative	19	40.2	72.857	651	651	-0.00277494	0.851893	1556	2244	0.528231	cAMP-specific phosphodiesterase, putative
Tb927.7.2950:mRNA-p1	Tb927.7.2950:mRNA-p1	ATPase family associated with various cellular activities (AAA), putative	10	19.3	74.103	670	670	-0.00277494	0.848154	1557	2158	0.470926	ATPase family associated with various cellular activities (AAA), putative
Tb927.11.10520:mRNA-p1	Tb927.11.10520:mRNA-p1	kinetoplastid kinetochore protein 2	13	13.8	139.2	1260	1260	-0.00277494	0.846334	1558	3511	1.17219	kinetoplastid kinetochore protein 2
Tb927.9.9740:mRNA-p1	Tb927.9.9740:mRNA-p1	AMP deaminase, putative	23	19.7	163.28	1417	1417	-0.00277494	0.845852	1559	2977	0.933238	AMP deaminase, putative
Tb927.11.13007:mRNA-p1;Tb927.11.13003:mRNA-p1	Tb927.11.13007:mRNA-p1;Tb927.11.13003:mRNA-p1	ubiquitin-60S ribosomal protein L40	3;3	8.6	14.656	128	128;128	-0.00277494	0.845526	1560	7149	2.1962	ubiquitin-60S ribosomal protein L40
Tb927.10.720:mRNA-p1	Tb927.10.720:mRNA-p1	Flagellum attachment zone protein 24	15	18.1	118.09	1083	1083	-0.00277494	0.844845	1561	438	-1.83347	Flagellum attachment zone protein 24
Tb927.11.6250:mRNA-p1	Tb927.11.6250:mRNA-p1	Mitochondrial ATP synthase subunit, putative	11	47.6	27.599	269	269	-0.00277494	0.843774	1562	1848	0.24257	Mitochondrial ATP synthase subunit, putative
Tb927.11.9880:mRNA-p1	Tb927.11.9880:mRNA-p1	Protein of unknown function (DUF2009), putative	10	26.2	51.909	451	451	-0.00277494	0.843686	1563	2100	0.426072	Protein of unknown function (DUF2009), putative
Tb927.10.7440:mRNA-p1	Tb927.10.7440:mRNA-p1	ATP-dependent RNA helicase MTR4	23	31.8	107.35	950	950	-0.00277494	0.842113	1564	1563	-0.000922734	ATP-dependent RNA helicase MTR4
Tb927.6.600:mRNA-p1	Tb927.6.600:mRNA-p1	ccr4-not transcription complex subunit	9	31.9	38.863	351	351	-0.00277494	0.841838	1565	1511	-0.050659	ccr4-not transcription complex subunit
Tb927.2.4400:mRNA-p1	Tb927.2.4400:mRNA-p1	SSU ribosomal protein, mitochondrial, putative	45	47.6	136.9	1181	1181	-0.00277494	0.84139	1566	4309	1.46027	SSU ribosomal protein, mitochondrial, putative
Tb927.3.5490:mRNA-p1	Tb927.3.5490:mRNA-p1	Putative intraflagellar transport protein B2	23	42.8	79.115	689	689	-0.00277494	0.841326	1567	682	-1.20016	Putative intraflagellar transport protein B2
Tb927.11.3600:mRNA-p1;Tb927.11.3590:mRNA-p1;Tb11.v5.1059.1-p1	Tb927.11.3600:mRNA-p1;Tb927.11.3590:mRNA-p1;Tb11.v5.1059.1-p1	40S ribosomal protein S4, putative	42;42;42	78	30.644	273	273;273;273	-0.00277494	0.8406	1568	162	-3.27486	40S ribosomal protein S4, putative
Tb927.11.15130:mRNA-p1	Tb927.11.15130:mRNA-p1	DnaJ homolog, putative	3	23.2	35.32	319	319	-0.00277494	0.840256	1569	903	-0.797047	DnaJ homolog, putative
Tb927.11.2030:mRNA-p1	Tb927.11.2030:mRNA-p1	hypothetical protein, conserved	24	48.2	65.096	568	568	-0.00277494	0.838827	1570	2927	0.898658	hypothetical protein, conserved
Tb927.1.1670:mRNA-p1;Tb11.v5.0887.1-p1	Tb927.1.1670:mRNA-p1	ARM-like helical domain-containing protein	52;19	46.8	120.87	1081	1081;566	-0.00277494	0.837904	1571	813	-0.950356	ARM-like helical domain-containing protein
Tb927.3.4600:mRNA-p1	Tb927.3.4600:mRNA-p1	hypothetical protein, conserved	8	9.7	121.4	1079	1079	-0.00277494	0.837711	1572	3180	1.01643	hypothetical protein, conserved
Tb927.2.5660:mRNA-p1	Tb927.2.5660:mRNA-p1	adenylate kinase, putative	2	13.1	29.339	260	260	-0.00277494	0.837208	1573	681	-1.20779	adenylate kinase, putative
Tb927.8.7380:mRNA-p1;Tb927.4.5050:pseudogenic_transcript-p1	Tb927.8.7380:mRNA-p1;Tb927.4.5050:pseudogenic_transcript-p1	dihydrolipoamide dehydrogenase, point mutation	8;5	18.7	60.014	546	546;521	-0.00277494	0.836702	1574	4108	1.384	dihydrolipoamide dehydrogenase, point mutation
Tb927.9.11270:mRNA-p1	Tb927.9.11270:mRNA-p1	t- complex protein 1 (eta subunit), putative	34	65.8	61.471	568	568	-0.00277494	0.835708	1575	251	-2.64959	t- complex protein 1 (eta subunit), putative
Tb927.2.3620:mRNA-p1	Tb927.2.3620:mRNA-p1	GTP-binding elongation factor Tu family, putative	18	27.6	87.19	805	805	-0.00277494	0.834962	1576	2972	0.915167	GTP-binding elongation factor Tu family, putative
Tb927.10.5480:mRNA-p1;Tb927.10.5460:mRNA-p1	Tb927.10.5480:mRNA-p1;Tb927.10.5460:mRNA-p1	60S ribosomal protein L24, putative	13;13	56	14.595	125	125;125	-0.00277494	0.834209	1577	827	-0.931223	60S ribosomal protein L24, putative
Tb927.3.2270:mRNA-p1	Tb927.3.2270:mRNA-p1	hypothetical protein, conserved	6	19.5	47.506	441	441	-0.00277494	0.834145	1578	4606	1.54542	hypothetical protein, conserved
Tb927.11.620:mRNA-p1	Tb927.11.620:mRNA-p1	Regulatory-associated protein of TOR1	17	14.6	143.96	1296	1296	-0.00277494	0.833904	1579	3668	1.21598	Regulatory-associated protein of TOR1
Tb927.11.1990:mRNA-p1	Tb927.11.1990:mRNA-p1	arginyl-tRNA synthetase, putative	35	53.8	78.432	692	692	-0.00277494	0.832888	1580	662	-1.25502	arginyl-tRNA synthetase, putative
Tb927.10.240:mRNA-p1	Tb927.10.240:mRNA-p1	peroxin 14, putative	15	55.7	39.937	366	366	-0.00277494	0.832192	1581	1159	-0.447957	peroxin 14, putative
Tb927.2.4210:mRNA-p1	Tb927.2.4210:mRNA-p1	Phosphoenolpyruvate carboxykinase [ATP], glycosomal	28	64.8	58.564	525	525	-0.00277494	0.83179	1582	230	-2.78204	Phosphoenolpyruvate carboxykinase [ATP], glycosomal
Tb927.10.5380:mRNA-p1;Tb11.v5.0337.1-p1	Tb927.10.5380:mRNA-p1;Tb11.v5.0337.1-p1	intraflagellar transport protein 122	71;68	61	139.43	1242	1242;1231	-0.00277494	0.831378	1583	785	-1.0119	intraflagellar transport protein 122
Tb927.7.3040:mRNA-p1	Tb927.7.3040:mRNA-p1	F-box and WD40 domain containing protein	20	45.5	69.073	635	635	-0.00277494	0.830875	1584	1196	-0.405355	F-box and WD40 domain containing protein
Tb927.4.3350:mRNA-p1	Tb927.4.3350:mRNA-p1	Carnosine N-methyltransferase, putative	6	24.5	47.244	417	417	-0.00277494	0.830801	1585	2392	0.593735	Carnosine N-methyltransferase, putative
Tb927.11.3740:mRNA-p1	Tb927.11.3740:mRNA-p1	proteasome regulatory ATPase subunit 2	25	59.7	48.928	437	437	-0.00277494	0.83073	1586	814	-0.962292	proteasome regulatory ATPase subunit 2
Tb927.10.10840:mRNA-p1;Tb11.v5.0423.1-p1	Tb927.10.10840:mRNA-p1;Tb11.v5.0423.1-p1	Enriched in surface-labeled proteome protein 15	4;2	12.5	60.057	569	569;235	-0.00277494	0.830036	1587	3622	1.19048	Enriched in surface-labeled proteome protein 15
Tb927.4.590:mRNA-p1	Tb927.4.590:mRNA-p1	PQQ-like domain/Protein of unknown function (DUF1620), putative	19	30.2	88.024	818	818	-0.00277494	0.829497	1588	990	-0.68171	PQQ-like domain/Protein of unknown function (DUF1620), putative
Tb927.9.11410:mRNA-p1;Tb927.9.11380:mRNA-p1	Tb927.9.11410:mRNA-p1;Tb927.9.11380:mRNA-p1	60S ribosomal protein L23, putative	16;16	79.1	14.962	139	139;139	-0.00277494	0.828839	1589	313	-2.34388	60S ribosomal protein L23, putative
Tb927.4.760:mRNA-p1	Tb927.4.760:mRNA-p1	AP-1 adapter complex gamma subunit, putative	34	46.2	87.344	801	801	-0.00277494	0.825297	1590	566	-1.49015	AP-1 adapter complex gamma subunit, putative
Tb927.11.15350:mRNA-p1	Tb927.11.15350:mRNA-p1	RNA-binding protein, putative	13	59.3	30.47	273	273	-0.00277494	0.824805	1591	3089	0.957206	RNA-binding protein, putative
Tb927.10.7540:mRNA-p1	Tb927.10.7540:mRNA-p1	VRR-NUC domain containing protein, putative	5	7.5	110.8	982	982	-0.00277494	0.824579	1592	4392	1.46404	VRR-NUC domain containing protein, putative
Tb927.6.1870:mRNA-p1	Tb927.6.1870:mRNA-p1	Eukaryotic translation initiation factor 4E-4	9	25.5	46.541	427	427	-0.00277494	0.823111	1593	1933	0.279095	Eukaryotic translation initiation factor 4E-4
Tb927.6.740:mRNA-p1	Tb927.6.740:mRNA-p1	ATP-dependent DEAH-box RNA helicase, putative	35	36.4	139.08	1251	1251	-0.00277494	0.822151	1594	2361	0.566746	ATP-dependent DEAH-box RNA helicase, putative
Tb927.1.3050:mRNA-p1	Tb927.1.3050:mRNA-p1	tRNA (Uracil-5-)-methyltransferase, putative	3	6.4	61.59	559	559	-0.00277494	0.819995	1595	3520	1.14202	tRNA (Uracil-5-)-methyltransferase, putative
Tb927.11.8190:mRNA-p1	Tb927.11.8190:mRNA-p1	DNA repair protein RAD51	5	20.1	40.719	373	373	-0.00277494	0.81895	1596	3167	0.988656	DNA repair protein RAD51
Tb927.10.12980:mRNA-p1	Tb927.10.12980:mRNA-p1	Multisite-specific tRNA:(cytosine-C(5))-methyltransferase, putative	23	31.6	88.799	806	806	-0.00277494	0.818557	1597	3889	1.28403	Multisite-specific tRNA:(cytosine-C(5))-methyltransferase, putative
Tb927.11.14230:mRNA-p1	Tb927.11.14230:mRNA-p1	Vps23 core domain containing protein, putative	19	56.2	50.257	454	454	-0.00277494	0.818431	1598	3002	0.909657	Vps23 core domain containing protein, putative
Tb927.9.8740:mRNA-p1	Tb927.9.8740:mRNA-p1	Double RNA binding domain protein 3	10	26.3	36.984	327	327	-0.00277494	0.817999	1599	643	-1.31428	Double RNA binding domain protein 3
Tb927.9.9010:mRNA-p1	Tb927.9.9010:mRNA-p1	SAC3/GANP/Nin1/mts3/eIF-3 p25 family, putative	6	11.6	66.318	585	585	-0.00277494	0.817704	1600	3101	0.954662	SAC3/GANP/Nin1/mts3/eIF-3 p25 family, putative
Tb927.11.8210:mRNA-p1;Tb11.v5.0573.1-p1;Tb11.v5.0572.1-p1	Tb927.11.8210:mRNA-p1	RAD50 DNA repair-like protein	31;5;5	24.8	152.77	1349	1349;325;486	-0.00277494	0.817536	1601	1774	0.148033	RAD50 DNA repair-like protein
Tb927.11.9760:mRNA-p1	Tb927.11.9760:mRNA-p1	hypothetical protein, conserved	6	18.6	45.743	430	430	-0.00277494	0.815537	1602	3032	0.920396	hypothetical protein, conserved
Tb927.3.3390:mRNA-p1	Tb927.3.3390:mRNA-p1	kinesin, putative	5	10.2	65.845	591	591	-0.00277494	0.815308	1603	2940	0.875042	kinesin, putative
Tb927.10.14490:mRNA-p1;Tb11.v5.0420.1-p1	Tb927.10.14490:mRNA-p1;Tb11.v5.0420.1-p1	hypothetical protein, conserved	10;10	33.8	46.24	420	420;420	-0.00277494	0.812068	1604	495	-1.69617	hypothetical protein, conserved
Tb927.4.3890:mRNA-p1	Tb927.4.3890:mRNA-p1	ATP-dependent RNA helicase, putative	39	37.4	122.8	1093	1093	-0.00277494	0.811231	1605	1256	-0.353737	ATP-dependent RNA helicase, putative
Tb927.11.10730:mRNA-p1	Tb927.11.10730:mRNA-p1	SWI/SNF-related helicase, putative	16	14.9	139.63	1211	1211	-0.00277494	0.808947	1606	4394	1.45206	SWI/SNF-related helicase, putative
Tb927.9.9940:mRNA-p1	Tb927.9.9940:mRNA-p1	parkin coregulated gene protein	11	44.9	35.353	312	312	-0.00277494	0.806953	1607	1365	-0.235469	parkin coregulated gene protein
Tb927.11.3500:mRNA-p1	Tb927.11.3500:mRNA-p1	Dpy-30 motif containing protein, putative	18	25.5	115.19	1017	1017	-0.00277494	0.806531	1608	907	-0.826093	Dpy-30 motif containing protein, putative
Tb927.6.2520:mRNA-p1	Tb927.6.2520:mRNA-p1	hypothetical protein, conserved	9	15.1	90.968	854	854	-0.00277494	0.805141	1609	2979	0.888664	hypothetical protein, conserved
Tb927.10.1390:mRNA-p1	Tb927.10.1390:mRNA-p1	Hypoxanthine-guanine-xanthine phosphoribosyltransferase	3	17.9	26.36	234	234	-0.00277494	0.804148	1610	874	-0.881356	Hypoxanthine-guanine-xanthine phosphoribosyltransferase
Tb927.7.4770:mRNA-p1;Tb11.v5.0160.1-p1	Tb927.7.4770:mRNA-p1;Tb11.v5.0160.1-p1	cyclophilin-type peptidyl-prolyl cis-trans isomerase, putative	2;2	10.1	21.225	198	198;198	-0.00277494	0.802787	1611	466	-1.78955	cyclophilin-type peptidyl-prolyl cis-trans isomerase, putative
Tb927.7.2390:mRNA-p1	Tb927.7.2390:mRNA-p1	Tripartite attachment complex protein 102	31	38.4	102.86	951	951	-0.00277494	0.802383	1612	1893	0.231823	Tripartite attachment complex protein 102
Tb927.3.5150:mRNA-p1	Tb927.3.5150:mRNA-p1	exonuclease, putative	3	13.1	37.899	329	329	-0.00277494	0.801613	1613	4516	1.4853	exonuclease, putative
Tb927.5.3250.1:mRNA-p1;Tb927.5.3250.2:mRNA-p1	Tb927.5.3250.1:mRNA-p1	hypothetical protein, conserved	53;1	38.9	172.16	1557	1557;39	-0.00277494	0.801348	1614	1614	0	hypothetical protein, conserved
Tb927.8.5580:mRNA-p1	Tb927.8.5580:mRNA-p1	N-terminal region of Chorein, a TM vesicle-mediated sorter/Integral peroxisomal membrane peroxin, putative	173	37.8	526.41	4810	4810	-0.00277494	0.800313	1615	1595	-0.0179777	N-terminal region of Chorein, a TM vesicle-mediated sorter/Integral peroxisomal membrane peroxin, putative
Tb927.11.3570:mRNA-p1	Tb927.11.3570:mRNA-p1	metallo-peptidase, Clan MA(E) Family M1	53	59	98.098	871	871	-0.00277494	0.799983	1616	436	-1.89003	metallo-peptidase, Clan MA(E) Family M1
Tb927.10.8690:mRNA-p1	Tb927.10.8690:mRNA-p1	TIGR00269 family protein, putative	3	14.6	37.923	336	336	-0.00277494	0.799738	1617	4580	1.50203	TIGR00269 family protein, putative
Tb927.1.3300:mRNA-p1	Tb927.1.3300:mRNA-p1	Myotubularin-related protein, putative	6	7.7	97.543	872	872	-0.00277494	0.797971	1618	1559	-0.0535907	Myotubularin-related protein, putative
Tb927.10.5010:mRNA-p1	Tb927.10.5010:mRNA-p1	Elongation factor G1, mitochondrial, putative	26	37.5	83.982	746	746	-0.00277494	0.797962	1619	1978	0.288939	Elongation factor G1, mitochondrial, putative
Tb927.11.11140:mRNA-p1	Tb927.11.11140:mRNA-p1	hypothetical protein	21	26.5	108.85	992	992	-0.00277494	0.797485	1620	1840	0.183712	hypothetical protein
Tb927.7.2070:mRNA-p1	Tb927.7.2070:mRNA-p1	heat shock protein DNAJ, putative	18	39.3	36.377	328	328	-0.00277494	0.797193	1621	2128	0.392614	heat shock protein DNAJ, putative
Tb927.9.14000:mRNA-p1;Tb927.8.6030:mRNA-p1	Tb927.9.14000:mRNA-p1;Tb927.8.6030:mRNA-p1	60S ribosomal protein L12, putative	6;6	43.9	17.578	164	164;164	-0.00277494	0.796767	1622	339	-2.25842	60S ribosomal protein L12, putative
Tb927.7.2660:mRNA-p1	Tb927.7.2660:mRNA-p1	zinc finger protein family member, putative	8	26.9	43.757	405	405	-0.00277494	0.795787	1623	1958	0.270718	zinc finger protein family member, putative
Tb927.2.1800:mRNA-p1	Tb927.2.1800:mRNA-p1	DNA polymerase delta catalytic subunit, putative	34	38.5	116.55	1026	1026	-0.00277494	0.794766	1624	2862	0.817472	DNA polymerase delta catalytic subunit, putative
Tb927.10.9640:mRNA-p1	Tb927.10.9640:mRNA-p1	hypothetical protein, conserved	2	14.1	39.29	341	341	-0.00277494	0.793689	1625	1907	0.230865	hypothetical protein, conserved
Tb927.7.1430:mRNA-p1	Tb927.7.1430:mRNA-p1	leucine-rich repeat protein (LRRP), putative	3	9.2	47.759	448	448	-0.00277494	0.793282	1626	1523	-0.0944113	leucine-rich repeat protein (LRRP), putative
Tb927.8.920:mRNA-p1	Tb927.8.920:mRNA-p1	ubiquitin-conjugating enzyme E2, putative	3	25.6	17.63	160	160	-0.00277494	0.791564	1627	3256	1.00089	ubiquitin-conjugating enzyme E2, putative
Tb927.7.2550:mRNA-p1	Tb927.7.2550:mRNA-p1	proteasome regulatory ATPase subunit 5	29	67	49.149	445	445	-0.00277494	0.79146	1628	839	-0.956358	proteasome regulatory ATPase subunit 5
Tb927.1.880:mRNA-p1;Tb11.v5.0418.1-p1;Tb11.v5.0419.1-p1	Tb927.1.880:mRNA-p1	Midasin, putative	37;6;4	9.1	512.6	4592	4592;733;527	-0.00277494	0.790603	1629	2701	0.729507	Midasin, putative
Tb927.5.3640:mRNA-p1	Tb927.5.3640:mRNA-p1	Mitochondrial SSU ribosomal protein, putative	2	12.2	30.64	270	270	-0.00277494	0.789434	1630	5391	1.72568	Mitochondrial SSU ribosomal protein, putative
Tb927.10.7500:mRNA-p1	Tb927.10.7500:mRNA-p1	fibrillarin	18	52.3	31.643	300	300	-0.00277494	0.788405	1631	923	-0.821354	fibrillarin
Tb927.5.3260:mRNA-p1	Tb927.5.3260:mRNA-p1	WD domain, G-beta repeat, putative	35	29.4	149.17	1399	1399	-0.00277494	0.788033	1632	1960	0.264213	WD domain, G-beta repeat, putative
Tb927.3.3160:mRNA-p1	Tb927.3.3160:mRNA-p1	Nuclear poly(A) polymerase 1	7	20.5	55.035	487	487	-0.00277494	0.787147	1633	5021	1.62045	Nuclear poly(A) polymerase 1
Tb927.6.3280:mRNA-p1	Tb927.6.3280:mRNA-p1	cyclosome subunit 1, putative	30	16.9	202.2	1837	1837	-0.00277494	0.785715	1634	4143	1.34227	cyclosome subunit 1, putative
Tb927.3.3610:mRNA-p1	Tb927.3.3610:mRNA-p1	peroxisomal targeting signal 2 receptor, putative	17	66.2	39.734	361	361	-0.00277494	0.785669	1635	1133	-0.529143	peroxisomal targeting signal 2 receptor, putative
Tb927.9.4500:mRNA-p1	Tb927.9.4500:mRNA-p1	heat shock protein, putative	19	24.6	91.117	835	835	-0.00277494	0.785353	1636	919	-0.832036	heat shock protein, putative
Tb11.v5.0868.1-p1;Tb927.9.2520:mRNA-p1	Tb11.v5.0868.1-p1;Tb927.9.2520:mRNA-p1	mitotubule-associated protein Gb4, putative	3;3	7.9	110.57	984	984;8214	-0.00277494	0.784107	1637	699	-1.22769	mitotubule-associated protein Gb4, putative
Tb927.8.4370:mRNA-p1	Tb927.8.4370:mRNA-p1	hypothetical protein, conserved	5	7.7	100.22	910	910	-0.00277494	0.783609	1638	1120	-0.548437	hypothetical protein, conserved
Tb927.6.1880:mRNA-p1	Tb927.6.1880:mRNA-p1	aspartyl-tRNA synthetase, putative	24	53.4	62.989	560	560	-0.00277494	0.783042	1639	559	-1.5519	aspartyl-tRNA synthetase, putative
Tb927.7.2500:mRNA-p1	Tb927.7.2500:mRNA-p1	proteasome regulatory ATPase subunit 1	28	71.9	48.475	437	437	-0.00277494	0.782772	1640	955	-0.780123	proteasome regulatory ATPase subunit 1
Tb927.11.11770:mRNA-p1	Tb927.11.11770:mRNA-p1	Eukaryotic translation initiation factor 4E-3	8	23.8	47.963	442	442	-0.00277494	0.782476	1641	1681	0.0347445	Eukaryotic translation initiation factor 4E-3
Tb927.11.7410:mRNA-p1	Tb927.11.7410:mRNA-p1	MSP-A, putative	6	14.5	73.405	675	675	-0.00277494	0.782024	1642	3145	0.937606	MSP-A, putative
Tb927.4.3970:mRNA-p1	Tb927.4.3970:mRNA-p1	hypothetical protein, conserved	6	20.3	53.637	487	487	-0.00277494	0.781943	1643	3229	0.974755	hypothetical protein, conserved
Tb927.7.3730:mRNA-p1	Tb927.7.3730:mRNA-p1	RNA-binding protein, putative	10	30.6	36.384	340	340	-0.00277494	0.781895	1644	5186	1.65741	RNA-binding protein, putative
Tb927.11.8290:mRNA-p1;Tb11.v5.1053.1-p1	Tb927.11.8290:mRNA-p1	DIS3-like exonuclease, putative	12;3	16.3	101.68	895	895;372	-0.00277494	0.781808	1645	3619	1.1375	DIS3-like exonuclease, putative
Tb927.11.6350:mRNA-p1	Tb927.11.6350:mRNA-p1	AAA ATPase, putative	5	4.7	141.13	1271	1271	-0.00277494	0.781651	1646	2983	0.8578	AAA ATPase, putative
Tb927.3.1380:mRNA-p1	Tb927.3.1380:mRNA-p1	ATP synthase subunit beta, mitochondrial	22	56.8	55.775	519	519	-0.00277494	0.779324	1647	315	-2.38642	ATP synthase subunit beta, mitochondrial
Tb927.10.3170:mRNA-p1;Tb11.v5.0791.1-p1	Tb927.10.3170:mRNA-p1;Tb11.v5.0791.1-p1	ABC transporter, putative	36;25	49.1	82.425	723	723;632	-0.00277494	0.778499	1648	1481	-0.154145	ABC transporter, putative
Tb927.10.3790:mRNA-p1;Tb11.v5.0583.1-p1;Tb11.v5.0603.1-p1	Tb927.10.3790:mRNA-p1	hypothetical protein, conserved	16;4;1	4.9	432.89	3901	3901;1030;668	-0.00277494	0.777692	1649	3605	1.12841	hypothetical protein, conserved
Tb927.4.1730:mRNA-p1	Tb927.4.1730:mRNA-p1	Nucleus and spindle associated protein 4	8	49.7	19.091	159	159	-0.00277494	0.776113	1650	6482	1.97397	Nucleus and spindle associated protein 4
Tb927.11.3320.1:mRNA-p1;Tb927.11.3320.2:mRNA-p1	Tb927.11.3320.1:mRNA-p1;Tb927.11.3320.2:mRNA-p1	ras-like small GTPase, putative	8;8	21.1	40.39	355	355;407	-0.00277494	0.775458	1651	4766	1.52944	ras-like small GTPase, putative
Tb927.5.960:mRNA-p1	Tb927.5.960:mRNA-p1	atpase family aaa domain-containing protein 1	13	43.9	37.159	335	335	-0.00277494	0.774509	1652	2068	0.324022	atpase family aaa domain-containing protein 1
Tb927.5.570:mRNA-p1	Tb927.5.570:mRNA-p1	hypothetical protein, conserved	25	13.6	233.39	2127	2127	-0.00277494	0.772002	1653	2131	0.366444	hypothetical protein, conserved
Tb927.11.450:mRNA-p1	Tb927.11.450:mRNA-p1	hypothetical protein, conserved	38	54.2	90.205	821	821	-0.00277494	0.771659	1654	3332	1.01043	hypothetical protein, conserved
Tb927.10.4310:mRNA-p1;Tb10.v4.0045:mRNA-p1	Tb927.10.4310:mRNA-p1;Tb10.v4.0045:mRNA-p1	prohibitin 2, putative	21;21	66.4	32.215	295	295;295	-0.00277494	0.770223	1655	1314	-0.332866	prohibitin 2, putative
Tb927.8.1840:mRNA-p1	Tb927.8.1840:mRNA-p1	Sec7 domain containing protein, putative	36	19.4	225.88	2063	2063	-0.00277494	0.77011	1656	1472	-0.169925	Sec7 domain containing protein, putative
Tb927.2.5610:mRNA-p1;Tb927.2.5530:mRNA-p1	Tb927.2.5610:mRNA-p1;Tb927.2.5530:mRNA-p1	Present in the outer mitochondrial membrane proteome 22B	14;14	13.3	162.48	1522	1522;1522	-0.00277494	0.769778	1657	6553	1.98358	Present in the outer mitochondrial membrane proteome 22B
Tb927.10.1490:mRNA-p1;Tb11.v5.0875.1-p1	Tb927.10.1490:mRNA-p1	Temperature dependent protein affecting M2 dsRNA replication, putative	33;6	25.9	134.81	1220	1220;595	-0.00277494	0.769605	1658	1045	-0.665941	Temperature dependent protein affecting M2 dsRNA replication, putative
Tb927.10.9970:mRNA-p1	Tb927.10.9970:mRNA-p1	hypothetical protein, conserved	24	27.8	110	1024	1024	-0.00277494	0.769584	1659	2463	0.570103	hypothetical protein, conserved
Tb927.3.780:mRNA-p1	Tb927.3.780:mRNA-p1	proteasome alpha 7 subunit	2	15.2	25.463	237	237	-0.00277494	0.768143	1660	997	-0.735518	proteasome alpha 7 subunit
Tb927.4.960:mRNA-p1	Tb927.4.960:mRNA-p1	WD domain, G-beta repeat, putative	18	18.6	128.61	1178	1178	-0.00277494	0.767972	1661	4320	1.37898	WD domain, G-beta repeat, putative
Tb927.11.9650:mRNA-p1	Tb927.11.9650:mRNA-p1	hypothetical protein, conserved	6	11.8	53.172	484	484	-0.00277494	0.766324	1662	5601	1.75276	hypothetical protein, conserved
Tb927.6.4770:mRNA-p1	Tb927.6.4770:mRNA-p1	protein mkt1, putative	34	49.4	83.306	735	735	-0.00277494	0.76575	1663	560	-1.57029	protein mkt1, putative
Tb927.7.4960:mRNA-p1;Tb11.v5.0177.1-p1	Tb927.7.4960:mRNA-p1;Tb11.v5.0177.1-p1	hypothetical protein, conserved	7;7	18.3	50.163	459	459;459	-0.00277494	0.764551	1664	3825	1.2008	hypothetical protein, conserved
Tb927.11.7218:mRNA-p1;Tb11.02.5120b.1-p1	Tb927.11.7218:mRNA-p1;Tb11.02.5120b.1-p1	mitochondrial edited mRNA stability factor 1 subunit	12;12	17.5	104.09	946	946;946	-0.00277494	0.764059	1665	6331	1.92691	mitochondrial edited mRNA stability factor 1 subunit
Tb927.10.3280:mRNA-p1	Tb927.10.3280:mRNA-p1	60S ribosomal proteins L38, putative	5	30.5	9.5664	82	82	-0.00277494	0.763898	1666	1445	-0.205319	60S ribosomal proteins L38, putative
Tb927.3.5440:mRNA-p1	Tb927.3.5440:mRNA-p1	SNF2 DNA repair protein, putative	7	4.7	167.03	1497	1497	-0.00277494	0.763807	1667	4731	1.50489	SNF2 DNA repair protein, putative
Tb927.3.4720:mRNA-p1	Tb927.3.4720:mRNA-p1	dynamin-1-like protein	10	16.5	73.321	660	660	-0.00277494	0.763335	1668	899	-0.891726	dynamin-1-like protein
Tb927.2.6080:mRNA-p1	Tb927.2.6080:mRNA-p1	hypothetical protein, conserved	4	10.4	59.936	528	528	-0.00277494	0.760987	1669	3909	1.22782	hypothetical protein, conserved
Tb927.3.870:mRNA-p1	Tb927.3.870:mRNA-p1	Histone RNA hairpin-binding protein RNA-binding domain containing protein, putative	7	22	47.873	432	432	-0.00277494	0.759951	1670	4782	1.51777	Histone RNA hairpin-binding protein RNA-binding domain containing protein, putative
Tb927.10.2630:mRNA-p1	Tb927.10.2630:mRNA-p1	Regulator of Vps4 activity in the MVB pathway, putative	2	8.7	30.445	277	277	-0.00277494	0.759305	1671	3427	1.03623	Regulator of Vps4 activity in the MVB pathway, putative
Tb927.11.16740:mRNA-p1	Tb927.11.16740:mRNA-p1	chaperone protein DnaJ, putative	9	27.6	42.846	384	384	-0.00277494	0.759234	1672	1835	0.134205	chaperone protein DnaJ, putative
Tb927.5.2150:mRNA-p1	Tb927.5.2150:mRNA-p1	hypothetical protein, conserved	8	19.8	60.078	529	529	-0.00277494	0.758924	1673	4747	1.50458	hypothetical protein, conserved
Tb927.10.13870:mRNA-p1	Tb927.10.13870:mRNA-p1	tubulin tyrosine ligase protein, putative	8	21.2	50.357	434	434	-0.00277494	0.758284	1674	4723	1.4964	tubulin tyrosine ligase protein, putative
Tb927.10.11570:mRNA-p1	Tb927.10.11570:mRNA-p1	hypothetical protein, conserved	3	4.4	80.205	733	733	-0.00277494	0.758046	1675	5389	1.68586	hypothetical protein, conserved
Tb927.11.670:mRNA-p1;Tb11.0890:mRNA-p1	Tb927.11.670:mRNA-p1;Tb11.0890:mRNA-p1	epsinR	21;20	41.8	55.266	505	505;493	-0.00277494	0.757686	1676	809	-1.05081	epsinR
Tb927.9.13380:mRNA-p1	Tb927.9.13380:mRNA-p1	Autophagy-related protein 24	33	75.4	48.172	419	419	-0.00277494	0.757573	1677	350	-2.26046	Autophagy-related protein 24
Tb927.7.1240:mRNA-p1	Tb927.7.1240:mRNA-p1	Sphingosine kinase	27	47.2	83.577	769	769	-0.00277494	0.755476	1678	2266	0.433405	Sphingosine kinase
Tb927.5.1930:mRNA-p1	Tb927.5.1930:mRNA-p1	signal peptidase subunit, putative	5	22.3	24.188	215	215	-0.00277494	0.755379	1679	1182	-0.506372	signal peptidase subunit, putative
Tb927.10.9800:mRNA-p1	Tb927.10.9800:mRNA-p1	60S ribosomal protein L22	2	13.1	15.271	130	130	-0.00277494	0.754548	1680	1935	0.203872	60S ribosomal protein L22
Tb927.10.14890:mRNA-p1;Tb11.v5.0636.1-p1;REV__CON__Q497I4;Tb927.7.4830:mRNA-p1;Tb11.v5.0165.1-p1	Tb927.10.14890:mRNA-p1;Tb11.v5.0636.1-p1	C-terminal motor kinesin, putative	70;70;1;1;1	66.6	90.8	820	820;820;455;516;516	-0.00277494	0.753163	1681	73	-4.52528	C-terminal motor kinesin, putative
Tb927.11.5020:mRNA-p1	Tb927.11.5020:mRNA-p1	hypothetical protein, conserved	9	5.2	186.51	1706	1706	-0.00277494	0.751491	1682	3915	1.21883	hypothetical protein, conserved
Tb927.11.5410:mRNA-p1	Tb927.11.5410:mRNA-p1	SUMO-interacting motif-containing protein	6	7.4	70.769	650	650	-0.00277494	0.751422	1683	6867	2.02864	SUMO-interacting motif-containing protein
Tb927.7.3440:mRNA-p1	Tb927.7.3440:mRNA-p1	I/6 autoantigen	2	12.2	27.05	246	246	-0.00277494	0.7514	1684	431	-1.96613	I/6 autoantigen
Tb927.11.13080:mRNA-p1	Tb927.11.13080:mRNA-p1	hypothetical protein, conserved	8	23.4	54.147	526	526	-0.00277494	0.750679	1685	2817	0.741411	hypothetical protein, conserved
Tb927.9.4360:mRNA-p1	Tb927.9.4360:mRNA-p1	KREL1	5	11.5	52.226	469	469	-0.00277494	0.75025	1686	3163	0.907689	KREL1
Tb927.4.1860:mRNA-p1	Tb927.4.1860:mRNA-p1	ribosomal protein S19, putative	15	61.1	18.846	167	167	-0.00277494	0.750245	1687	414	-2.02676	ribosomal protein S19, putative
Tb927.11.7850:mRNA-p1	Tb927.11.7850:mRNA-p1	hypothetical protein, conserved	4	24.3	19.449	173	173	-0.00277494	0.750201	1688	4286	1.34432	hypothetical protein, conserved
Tb927.11.5680:mRNA-p1	Tb927.11.5680:mRNA-p1	dynein light chain 1, axonemal	2	12.4	23.96	210	210	-0.00277494	0.749303	1689	1304	-0.373225	dynein light chain 1, axonemal
Tb927.5.4520:mRNA-p1;Tb05.5K5.160:mRNA-p1	Tb927.5.4520:mRNA-p1;Tb05.5K5.160:mRNA-p1	Kinetochore interacting protein 1	119;119	72.9	108.2	926	926;926	-0.00277494	0.749148	1690	2676	0.663055	Kinetochore interacting protein 1
Tb927.11.11570:mRNA-p1	Tb927.11.11570:mRNA-p1	Translation initiation factor eIF-2B subunit epsilon, putative	20	38	87.632	800	800	-0.00277494	0.748795	1691	2078	0.297319	Translation initiation factor eIF-2B subunit epsilon, putative
Tb927.3.620:mRNA-p1	Tb927.3.620:mRNA-p1	ATP-dependent DEAD/H RNA helicase, putative	7	10.4	90.439	808	808	-0.00277494	0.748196	1692	5036	1.57355	ATP-dependent DEAD/H RNA helicase, putative
Tb927.9.9690:mRNA-p1	Tb927.9.9690:mRNA-p1	hypothetical protein, conserved	2	16.2	25.496	234	234	-0.00277494	0.748162	1693	6431	1.92546	hypothetical protein, conserved
Tb927.10.730:mRNA-p1;Tb11.v5.0822.1-p1	Tb927.10.730:mRNA-p1;Tb11.v5.0822.1-p1	ATP synthase, putative	9;8	18.6	52.901	468	468;499	-0.00277494	0.746863	1694	1094	-0.630821	ATP synthase, putative
Tb927.8.6400:mRNA-p1	Tb927.8.6400:mRNA-p1	hypothetical protein, conserved	13	61.4	28.391	236	236	-0.00277494	0.745923	1695	7149	2.07646	hypothetical protein, conserved
Tb927.5.3610:mRNA-p1	Tb927.5.3610:mRNA-p1	adaptor complex protein (AP) 3 delta subunit 1, putative	34	32.4	125.4	1127	1127	-0.00277494	0.74516	1696	2748	0.696246	adaptor complex protein (AP) 3 delta subunit 1, putative
Tb927.4.1930:mRNA-p1;REV__Tb927.11.13360:mRNA-p1	Tb927.4.1930:mRNA-p1	eukaryotic translation initiation factor 3 subunit g	17;1	61.8	31.293	272	272;1281	-0.00277494	0.744794	1697	974	-0.800993	eukaryotic translation initiation factor 3 subunit g
Tb927.3.5620:mRNA-p1	Tb927.3.5620:mRNA-p1	Facilitates chromatin transcription complex subunit spt16	25	26.2	113.69	1022	1022	-0.00277494	0.744577	1698	648	-1.38977	Facilitates chromatin transcription complex subunit spt16
Tb927.11.11330:mRNA-p1;Tb11.v5.1035.1-p1;Tb11.v5.1034.1-p1	Tb927.11.11330:mRNA-p1;Tb11.v5.1035.1-p1	heat shock protein 70	43;42;17	54.6	71.408	661	661;689;203	-0.00277494	0.74343	1699	24	-6.14551	heat shock protein 70
Tb927.11.11940:mRNA-p1	Tb927.11.11940:mRNA-p1	protein phosphatase 2A, putative	9	31.4	34.56	306	306	-0.00277494	0.742666	1700	2642	0.636096	protein phosphatase 2A, putative
Tb927.11.15750:mRNA-p1	Tb927.11.15750:mRNA-p1	AMP deaminase, putative	34	30.4	163.21	1417	1417	-0.00277494	0.741203	1701	1965	0.208146	AMP deaminase, putative
Tb927.2.2440:mRNA-p1	Tb927.2.2440:mRNA-p1	proteasome regulatory non-ATPase subunit 6	19	50.3	57.323	513	513	-0.00277494	0.741189	1702	710	-1.26134	proteasome regulatory non-ATPase subunit 6
Tb927.9.3080:mRNA-p1	Tb927.9.3080:mRNA-p1	hypothetical protein, conserved	3	8.2	47.331	428	428	-0.00277494	0.74067	1703	4126	1.27667	hypothetical protein, conserved
Tb927.6.1500:mRNA-p1	Tb927.6.1500:mRNA-p1	alkyl-dihydroxyacetone phosphate synthase	25	50.9	69.067	613	613	-0.00277494	0.74019	1704	1531	-0.154451	alkyl-dihydroxyacetone phosphate synthase
Tb927.11.15900:mRNA-p1;Tb927.11.15880:mRNA-p1	Tb927.11.15900:mRNA-p1;Tb927.11.15880:mRNA-p1	60S ribosomal protein L27, putative	16;16	63.2	15.581	133	133;133	-0.00277494	0.739564	1705	393	-2.11717	60S ribosomal protein L27, putative
Tb11.v5.0325.1-p1	Tb11.v5.0325.1-p1	retrotransposon hot spot (RHS) protein, putative	3	10.2	36.986	325	325	-0.00277494	0.738363	1706	2487	0.543789	retrotransposon hot spot (RHS) protein, putative
Tb927.10.14860:mRNA-p1	Tb927.10.14860:mRNA-p1	NADH-ubiquinone oxidoreductase B14 subunit	5	7.4	83.434	713	713	-0.00277494	0.737923	1707	4261	1.31973	NADH-ubiquinone oxidoreductase B14 subunit
Tb927.10.14470:mRNA-p1	Tb927.10.14470:mRNA-p1	intraflagellar transport protein 140	69	41.3	186.61	1696	1696	-0.00277494	0.737284	1708	789	-1.11421	intraflagellar transport protein 140
Tb927.10.6370:mRNA-p1;Tb927.10.220:mRNA-p1	Tb927.10.6370:mRNA-p1;Tb927.10.220:mRNA-p1	60S ribosomal proteins L37, putative	5;5	45.2	10.458	93	93;93	-0.00277494	0.735864	1709	726	-1.23511	60S ribosomal proteins L37, putative
Tb927.10.14710:mRNA-p1;Tb927.10.14600:mRNA-p1	Tb927.10.14710:mRNA-p1;Tb927.10.14600:mRNA-p1	40S ribosomal protein S2, putative	29;29	72.9	28.642	266	266;266	-0.00277494	0.731568	1710	271	-2.65763	40S ribosomal protein S2, putative
Tb927.11.1390:mRNA-p1	Tb927.11.1390:mRNA-p1	class I transcription factor A, subunit 1	3	7.5	52.922	465	465	-0.00277494	0.730656	1711	3424	1.00084	class I transcription factor A, subunit 1
Tb927.10.2570:mRNA-p1;Tb11.v5.0498.1-p1	Tb927.10.2570:mRNA-p1;Tb11.v5.0498.1-p1	lysosomal alpha-mannosidase precursor, putative	8;5	10.5	111.75	997	997;708	-0.00277494	0.73048	1712	2610	0.608367	lysosomal alpha-mannosidase precursor, putative
Tb927.10.3890.2:mRNA-p1;Tb927.10.3890.1:mRNA-p1	Tb927.10.3890.2:mRNA-p1;Tb927.10.3890.1:mRNA-p1	phosphatidylinositol-4-phosphate 5-kinase, putative	2;2	3.1	85.567	777	777;839	-0.00277494	0.730075	1713	7149	2.06122	phosphatidylinositol-4-phosphate 5-kinase, putative
Tb927.11.1260:mRNA-p1	Tb927.11.1260:mRNA-p1	copper-transporting ATPase-like protein, putative	6	6.9	102.34	961	961	-0.00277494	0.729235	1714	4442	1.37384	copper-transporting ATPase-like protein, putative
Tb927.5.2330:mRNA-p1	Tb927.5.2330:mRNA-p1	hypothetical protein, conserved	42	11.2	484.9	4417	4417	-0.00277494	0.728646	1715	4153	1.27595	hypothetical protein, conserved
Tb927.10.4170:mRNA-p1	Tb927.10.4170:mRNA-p1	hypothetical protein, conserved	6	2.7	291.82	2539	2539	-0.00277494	0.727717	1716	2905	0.759489	hypothetical protein, conserved
Tb927.8.4460:mRNA-p1	Tb927.8.4460:mRNA-p1	Domain of Unknown Function (DUF1042), putative	3	4	109.59	1009	1009	-0.00277494	0.727346	1717	1986	0.209976	Domain of Unknown Function (DUF1042), putative
Tb927.8.7480:mRNA-p1	Tb927.8.7480:mRNA-p1	hypothetical protein, conserved	15	37	70.712	635	635	-0.00277494	0.726953	1718	6053	1.81692	hypothetical protein, conserved
Tb927.11.15190:mRNA-p1	Tb927.11.15190:mRNA-p1	Domain of unknown function (DUF4200), putative	3	5.3	77.343	682	682	-0.00277494	0.726886	1719	1980	0.203931	Domain of unknown function (DUF4200), putative
Tb927.9.4420:mRNA-p1	Tb927.9.4420:mRNA-p1	Beat-regulation protein	9	30.8	46.604	415	415	-0.00277494	0.726762	1720	2040	0.246161	Beat-regulation protein
Tb927.11.4820:mRNA-p1;Tb927.10.14580:mRNA-p1	Tb927.11.4820:mRNA-p1;Tb927.10.14580:mRNA-p1	60S ribosomal protein L17, putative	14;14	64.5	19.105	166	166;166	-0.00277494	0.724221	1721	741	-1.2157	60S ribosomal protein L17, putative
Tb927.1.120:mRNA-p1	Tb927.1.120:mRNA-p1	retrotransposon hot spot protein 4 (RHS4), putative	12	15.9	98.024	856	856	-0.00277494	0.723623	1722	240	-2.84298	retrotransposon hot spot protein 4 (RHS4), putative
Tb927.6.1950:mRNA-p1	Tb927.6.1950:mRNA-p1	N-acetyltransferase B complex (NatB) non catalytic subunit, putative	12	12.1	95.774	862	862	-0.00277494	0.723615	1723	1574	-0.130487	N-acetyltransferase B complex (NatB) non catalytic subunit, putative
Tb927.1.3450:mRNA-p1;Tb11.v5.0619.1-p1	Tb927.1.3450:mRNA-p1;Tb11.v5.0619.1-p1	hypothetical protein, conserved	21;17	32.5	84.883	791	791;758	-0.00277494	0.722712	1724	2373	0.460952	hypothetical protein, conserved
Tb927.4.1680:mRNA-p1	Tb927.4.1680:mRNA-p1	ZFP family member, putative	9	33.3	51.675	469	469	-0.00277494	0.722604	1725	1431	-0.269573	ZFP family member, putative
Tb927.11.370:mRNA-p1	Tb927.11.370:mRNA-p1	repressor activator protein 1	10	14.5	92.869	855	855	-0.00277494	0.721537	1726	1637	-0.0763781	repressor activator protein 1
Tb927.7.2240:mRNA-p1	Tb927.7.2240:mRNA-p1	hypothetical protein, conserved	15	34.7	59.665	544	544	-0.00277494	0.72148	1727	654	-1.40091	hypothetical protein, conserved
Tb927.9.5860:mRNA-p1;Tb927.9.5770:mRNA-p1	Tb927.9.5860:mRNA-p1;Tb927.9.5770:mRNA-p1	tryparedoxin peroxidase	23;23	82.9	22.424	199	199;199	-0.00277494	0.721319	1728	144	-3.58496	tryparedoxin peroxidase
Tb927.11.5990:mRNA-p1	Tb927.11.5990:mRNA-p1	LSU ribosomal protein, mitochondrial, putative	2	3.1	69.307	616	616	-0.00277494	0.721277	1729	6408	1.88994	LSU ribosomal protein, mitochondrial, putative
Tb927.6.5150:mRNA-p1;Tb11.v5.0657.1-p1	Tb927.6.5150:mRNA-p1	hypothetical protein, conserved	18;2	6.1	329.49	2946	2946;531	-0.00277494	0.721175	1730	5347	1.62796	hypothetical protein, conserved
Tb927.6.4140:mRNA-p1	Tb927.6.4140:mRNA-p1	paraflagellar rod component, putative	5	67.8	13.009	115	115	-0.00277494	0.720553	1731	269	-2.68593	paraflagellar rod component, putative
Tb927.9.5620:mRNA-p1	Tb927.9.5620:mRNA-p1	hypothetical protein, conserved	7	8.4	149.28	1346	1346	-0.00277494	0.719833	1732	4365	1.33354	hypothetical protein, conserved
Tb927.1.700:mRNA-p1	Tb927.1.700:mRNA-p1	phosphoglycerate kinase	11	27.3	47.245	440	440	-0.00277494	0.719621	1733	64	-4.75906	phosphoglycerate kinase
Tb927.6.1780:mRNA-p1	Tb927.6.1780:mRNA-p1	mitogen activated protein kinase 4, putative	4	11.7	46.119	411	411	-0.00277494	0.71833	1734	3678	1.08482	mitogen activated protein kinase 4, putative
Tb927.3.1920:mRNA-p1	Tb927.3.1920:mRNA-p1	General negative regulator of transcription subunit 5	26	42.7	66.856	604	604	-0.00277494	0.717612	1735	1249	-0.474162	General negative regulator of transcription subunit 5
Tb927.6.610:mRNA-p1	Tb927.6.610:mRNA-p1	kinetoplast ribosomal PPR-repeat containing protein 18	3	10.2	64.961	579	579	-0.00277494	0.71701	1736	5368	1.62862	kinetoplast ribosomal PPR-repeat containing protein 18
Tb927.10.14570:mRNA-p1	Tb927.10.14570:mRNA-p1	kinesin motor domain containing protein, putative	4	6.4	81.138	718	718	-0.00277494	0.715399	1737	1909	0.136219	kinesin motor domain containing protein, putative
Tb927.9.5040:mRNA-p1	Tb927.9.5040:mRNA-p1	cAMP-specific phosphodiesterase	10	16	103.65	930	930	-0.00277494	0.71413	1738	459	-1.92086	cAMP-specific phosphodiesterase
Tb927.9.6290:mRNA-p1	Tb927.9.6290:mRNA-p1	arginine kinase	5	6.7	40.196	356	356	-0.00277494	0.713638	1739	824	-1.07754	arginine kinase
Tb927.5.680.2:mRNA-p1;Tb927.5.680.1:mRNA-p1	Tb927.5.680.2:mRNA-p1	hypothetical protein, conserved	6;1	16.1	65.263	585	585;178	-0.00277494	0.713082	1740	6441	1.8882	hypothetical protein, conserved
Tb927.7.7010:mRNA-p1	Tb927.7.7010:mRNA-p1	LSU ribosomal protein, mitochondrial, putative	3	24	18.121	154	154	-0.00277494	0.712146	1741	5315	1.61015	LSU ribosomal protein, mitochondrial, putative
Tb927.11.4380:mRNA-p1	Tb927.11.4380:mRNA-p1	ATP-dependent RNA helicase, putative	64	31.7	243.37	2151	2151	-0.00277494	0.710985	1742	2880	0.725324	ATP-dependent RNA helicase, putative
Tb927.8.2160:mRNA-p1	Tb927.8.2160:mRNA-p1	p-glycoprotein	17	11.3	174.68	1581	1581	-0.00277494	0.710648	1743	2080	0.255011	p-glycoprotein
Tb927.10.10280:mRNA-p1	Tb927.10.10280:mRNA-p1	microtubule-associated protein, putative	3	1	267.6	2371	2371	-0.00277494	0.710401	1744	1592	-0.13156	microtubule-associated protein, putative
Tb927.3.5250:mRNA-p1	Tb927.3.5250:mRNA-p1	Zinc finger CCCH domain-containing protein 8	10	26.6	61.206	579	579	-0.00277494	0.709988	1745	2456	0.493084	Zinc finger CCCH domain-containing protein 8
Tb927.5.4500:mRNA-p1;Tb05.5K5.150:mRNA-p1	Tb927.5.4500:mRNA-p1;Tb05.5K5.150:mRNA-p1	ras-like small GTPase, putative	12;12	77.8	21.771	194	194;194	-0.00277494	0.709676	1746	583	-1.58249	ras-like small GTPase, putative
Tb927.10.4570:mRNA-p1;Tb927.10.4560:mRNA-p1	Tb927.10.4570:mRNA-p1;Tb927.10.4560:mRNA-p1	elongation factor 2	49;49	60.9	94.333	846	846;846	-0.00277494	0.708251	1747	47	-5.21608	elongation factor 2
Tb927.3.3130:mRNA-p1	Tb927.3.3130:mRNA-p1	Present in the outer mitochondrial membrane proteome 24	63	34.3	178.08	1642	1642	-0.00277494	0.707917	1748	694	-1.3327	Present in the outer mitochondrial membrane proteome 24
Tb927.3.3780:mRNA-p1;Tb927.3.3760:mRNA-p1	Tb927.3.3780:mRNA-p1;Tb927.3.3760:mRNA-p1	tryparedoxin 1a, putative	7;7	48.6	15.891	144	144;144	-0.00277494	0.705753	1749	268	-2.70623	tryparedoxin 1a, putative
Tb927.10.5770:mRNA-p1	Tb927.10.5770:mRNA-p1	Valosin-containing protein	59	75.8	85.825	780	780	-0.00277494	0.705462	1750	233	-2.90895	Valosin-containing protein
Tb927.8.2280:mRNA-p1;Tb927.8.2260:mRNA-p1	Tb927.8.2280:mRNA-p1;Tb927.8.2260:mRNA-p1	Present in the outer mitochondrial membrane proteome 39-4	2;2	4.5	21.768	199	199;199	-0.00277494	0.705315	1751	2224	0.344978	Present in the outer mitochondrial membrane proteome 39-4
Tb927.11.9120:mRNA-p1	Tb927.11.9120:mRNA-p1	SNF2 family N-terminal domain/Ring finger domain containing protein, putative	6	12.4	87.233	769	769	-0.00277494	0.705135	1752	4776	1.4468	SNF2 family N-terminal domain/Ring finger domain containing protein, putative
Tb927.10.9280:mRNA-p1;Tb11.v5.0485.1-p1	Tb927.10.9280:mRNA-p1;Tb11.v5.0485.1-p1	hypothetical protein, conserved	8;7	11.2	107.84	957	957;900	-0.00277494	0.704855	1753	3992	1.18729	hypothetical protein, conserved
Tb927.1.4830:mRNA-p1	Tb927.1.4830:mRNA-p1	phospholipase A1	8	43.7	32.404	300	300	-0.00277494	0.704162	1754	852	-1.04172	phospholipase A1
Tb927.10.5820:mRNA-p1	Tb927.10.5820:mRNA-p1	predicted RanGDP binding protein	5	6.7	109.23	1003	1003	-0.00277494	0.704081	1755	4915	1.48572	predicted RanGDP binding protein
Tb927.11.15970:mRNA-p1	Tb927.11.15970:mRNA-p1	Guanine nucleotide exchange factor in Golgi transport N-terminal/Sec7 domain containing protein, putative	18	22.2	117.09	1046	1046	-0.00277494	0.703968	1756	2232	0.346044	Guanine nucleotide exchange factor in Golgi transport N-terminal/Sec7 domain containing protein, putative
Tb927.10.3760:mRNA-p1	Tb927.10.3760:mRNA-p1	vacuolar ATP synthase subunit d, putative	9	31.8	31.285	283	283	-0.00277494	0.703035	1757	1984	0.175298	vacuolar ATP synthase subunit d, putative
Tb927.11.14140:mRNA-p1	Tb927.11.14140:mRNA-p1	ethanolamine-phosphate cytidylyltransferase	6	22.7	43.424	384	384	-0.00277494	0.702585	1758	1468	-0.260083	ethanolamine-phosphate cytidylyltransferase
Tb927.8.2660:mRNA-p1;Tb11.v5.0471.1-p1;Tb11.v5.0472.1-p1	Tb927.8.2660:mRNA-p1	Galactose oxidase, central domain containing protein, putative	9;3;1	5.7	209.69	1919	1919;752;425	-0.00277494	0.702034	1759	2282	0.375543	Galactose oxidase, central domain containing protein, putative
Tb927.11.6270:mRNA-p1	Tb927.11.6270:mRNA-p1	inositol-1,4,5-trisphosphate (IP3) 5-phosphatase, putative	14	34.9	62.121	564	564	-0.00277494	0.700591	1760	2300	0.386058	inositol-1,4,5-trisphosphate (IP3) 5-phosphatase, putative
Tb927.11.16840.1-p1;Tb927.11.16840.2-p1	Tb927.11.16840.1-p1;Tb927.11.16840.2-p1	hypothetical protein, conserved	10;10	12	101.32	910	910;920	-0.00277494	0.700578	1761	3911	1.15114	hypothetical protein, conserved
Tb927.11.9640:mRNA-p1	Tb927.11.9640:mRNA-p1	glycyl-tRNA synthetase, putative	25	45.8	70.175	624	624	-0.00277494	0.700509	1762	612	-1.52561	glycyl-tRNA synthetase, putative
Tb927.11.6540:mRNA-p1	Tb927.11.6540:mRNA-p1	hypothetical protein, conserved	3	10	60.154	550	550	-0.00277494	0.699774	1763	3611	1.03437	hypothetical protein, conserved
Tb927.9.2550:mRNA-p1	Tb927.9.2550:mRNA-p1	Domain of unknown function (DUF4457), putative	2	3.7	113.57	1042	1042	-0.00277494	0.698988	1764	3282	0.895725	Domain of unknown function (DUF4457), putative
Tb927.3.5550:mRNA-p1	Tb927.3.5550:mRNA-p1	intraflagellar transport protein 27	7	42.1	20.638	183	183	-0.00277494	0.698803	1765	1086	-0.700644	intraflagellar transport protein 27
Tb927.1.450:pseudogenic_transcript-p1;Tb927.1.430:pseudogenic_transcript-p1	Tb927.1.450:pseudogenic_transcript-p1	retrotransposon hot spot protein (RHS, pseudogene), putative	4;1	2.9	229.01	2097	2097;2422	-0.00277494	0.698175	1766	3016	0.772151	retrotransposon hot spot protein (RHS, pseudogene), putative
Tb927.8.6960:mRNA-p1;Tb04.24M18.150:mRNA-p1;Tb927.4.5360:pseudogenic_transcript-p1	Tb927.8.6960:mRNA-p1	NADH-ubiquinone oxidoreductase complex I subunit, putative	8;3;1	20.3	42.527	385	385;162;176	-0.00277494	0.69763	1767	2144	0.279003	NADH-ubiquinone oxidoreductase complex I subunit, putative
Tb927.11.10990:mRNA-p1	Tb927.11.10990:mRNA-p1	methylthioribose-1-phosphate isomerase, putative	10	33.7	42.136	386	386	-0.00277494	0.697599	1768	1611	-0.134162	methylthioribose-1-phosphate isomerase, putative
Tb927.11.14590:mRNA-p1	Tb927.11.14590:mRNA-p1	G5-interacting protein	18	35.8	70.339	629	629	-0.00277494	0.697397	1769	1105	-0.678888	G5-interacting protein
Tb927.3.5370:mRNA-p1	Tb927.3.5370:mRNA-p1	hypothetical protein, conserved	13	40.6	34.254	313	313	-0.00277494	0.697194	1770	976	-0.858796	hypothetical protein, conserved
Tb927.3.2440:mRNA-p1	Tb927.3.2440:mRNA-p1	AGC essential kinase 1	14	42.1	45.811	406	406	-0.00277494	0.696715	1771	1771	0	AGC essential kinase 1
Tb927.2.820:pseudogenic_transcript-p1	Tb927.2.820:pseudogenic_transcript-p1	retrotransposon hot spot protein 1 (RHS1), interrupted	5	8.9	60.527	527	527	-0.00277494	0.696527	1772	1257	-0.495394	retrotransposon hot spot protein 1 (RHS1), interrupted
Tb927.11.14090:mRNA-p1	Tb927.11.14090:mRNA-p1	Double RNA binding domain protein 18	17	46.2	51.674	480	480	-0.00277494	0.696441	1773	435	-2.02711	Double RNA binding domain protein 18
Tb927.8.3610:mRNA-p1	Tb927.8.3610:mRNA-p1	AKAP7 25 RNA ligase-like domain containing protein, putative	7	20.6	48.915	446	446	-0.00277494	0.695809	1774	3971	1.1625	AKAP7 25 RNA ligase-like domain containing protein, putative
Tb927.9.1850:mRNA-p1;Tb927.9.1810:mRNA-p1	Tb927.9.1850:mRNA-p1;Tb927.9.1810:mRNA-p1	60S ribosomal protein L35, putative	10;10	44.1	15.144	127	127;127	-0.00277494	0.694475	1775	832	-1.09316	60S ribosomal protein L35, putative
Tb927.10.15520:mRNA-p1;Tb11.v5.0812.1-p1	Tb927.10.15520:mRNA-p1;Tb11.v5.0812.1-p1	signal recognition particle protein, putative	37;20	59.8	76.262	676	676;340	-0.00277494	0.693829	1776	1900	0.0973678	signal recognition particle protein, putative
Tb927.11.15480:mRNA-p1	Tb927.11.15480:mRNA-p1	heat shock protein Hsp20, putative	3	20.7	23.085	208	208	-0.00277494	0.693543	1777	795	-1.16042	heat shock protein Hsp20, putative
Tb927.8.8170:mRNA-p1	Tb927.8.8170:mRNA-p1	mitochondrial RNA binding protein 1, putative	14	19.3	100.4	905	905	-0.00277494	0.693249	1778	2987	0.748442	mitochondrial RNA binding protein 1, putative
Tb927.11.2830:mRNA-p1	Tb927.11.2830:mRNA-p1	hypothetical protein, conserved	3	4.5	115.18	1036	1036	-0.00277494	0.693006	1779	3762	1.08043	hypothetical protein, conserved
Tb927.9.12510:mRNA-p1	Tb927.9.12510:mRNA-p1	ATP-dependent DEAD/H RNA helicase, putative	37	49.4	82.74	735	735	-0.00277494	0.692486	1780	510	-1.80331	ATP-dependent DEAD/H RNA helicase, putative
Tb927.11.16460:mRNA-p1	Tb927.11.16460:mRNA-p1	hypothetical protein, conserved	3	8	82.494	742	742	-0.00277494	0.691881	1781	7149	2.00505	hypothetical protein, conserved
Tb927.7.3460:mRNA-p1	Tb927.7.3460:mRNA-p1	LSU ribosomal protein, mitochondrial, putative	6	17.4	50.252	449	449	-0.00277494	0.691678	1782	5075	1.50991	LSU ribosomal protein, mitochondrial, putative
Tb927.8.5480:mRNA-p1	Tb927.8.5480:mRNA-p1	hypothetical protein, conserved	4	25.8	36.906	341	341	-0.00277494	0.690161	1783	4523	1.34297	hypothetical protein, conserved
Tb11.v5.0330.1-p1;Tb927.10.8440:mRNA-p1;Tb927.10.8480:mRNA-p1;Tb11.v5.0307.1-p1;Tb11.v5.0308.1-p1;Tb11.v5.0309.1-p1;Tb927.10.8460:mRNA-p1;Tb927.10.8470:mRNA-p1;Tb927.10.8450:mRNA-p1;Tb11.v5.0310.1-p1;Tb927.10.8510:mRNA-p1;Tb927.10.8530:mRNA-p1;Tb927.10.8520:mRNA-p1;Tb11.v5.0333.1-p1;Tb927.10.8500:mRNA-p1;Tb927.10.8490:mRNA-p1;Tb11.v5.0332.1-p1;Tb11.v5.0331.1-p1	Tb11.v5.0330.1-p1;Tb927.10.8440:mRNA-p1;Tb927.10.8480:mRNA-p1;Tb11.v5.0307.1-p1;Tb11.v5.0308.1-p1;Tb11.v5.0309.1-p1;Tb927.10.8460:mRNA-p1;Tb927.10.8470:mRNA-p1;Tb927.10.8450:mRNA-p1;Tb11.v5.0310.1-p1	THT1 - hexose transporter, putative	7;7;6;6;6;6;6;6;5;5;1;1;1;1;1;1;1;1	13.3	56.44	527	527;527;527;527;527;527;527;527;527;527;529;529;529;322;529;529;529;529	-0.00277494	0.689053	1784	7149	2.00263	THT1 - hexose transporter, putative
Tb927.9.10770:mRNA-p1	Tb927.9.10770:mRNA-p1	polyadenylate-binding protein 2	50	71.7	62.147	555	555	-0.00277494	0.688944	1785	133	-3.74643	polyadenylate-binding protein 2
Tb927.10.15180:mRNA-p1	Tb927.10.15180:mRNA-p1	nucleosome assembly protein, putative	5	15.6	41.302	366	366	-0.00277494	0.688534	1786	964	-0.889627	nucleosome assembly protein, putative
Tb927.8.3520:mRNA-p1	Tb927.8.3520:mRNA-p1	hypothetical protein, conserved	31	48.6	69.245	590	590	-0.00277494	0.688357	1787	1821	0.0271913	hypothetical protein, conserved
Tb927.8.4500:mRNA-p1;Tb11.v5.0763.1-p1	Tb927.8.4500:mRNA-p1;Tb11.v5.0763.1-p1	Eukaryotic translation initiation factor 4 gamma 5	40;32	50.9	84.574	749	749;565	-0.00277494	0.687917	1788	890	-1.00647	Eukaryotic translation initiation factor 4 gamma 5
Tb927.10.4180:mRNA-p1	Tb927.10.4180:mRNA-p1	TFIIF-stimulated CTD phosphatase, putative	17	76.1	28.189	247	247	-0.00277494	0.686743	1789	658	-1.44299	TFIIF-stimulated CTD phosphatase, putative
Tb927.8.5980:mRNA-p1	Tb927.8.5980:mRNA-p1	TFIIH basal transcription factor complex helicase subunit, putative	3	5	90.811	803	803	-0.00277494	0.686065	1790	4759	1.4107	TFIIH basal transcription factor complex helicase subunit, putative
Tb927.5.450:mRNA-p1;Tb11.v5.0222.1-p1	Tb927.5.450:mRNA-p1;Tb11.v5.0222.1-p1	NADH dehydrogenase [ubiquinone] flavoprotein 1, mitochondrial	10;10	29	55.32	496	496;496	-0.00277494	0.684502	1791	5805	1.69653	NADH dehydrogenase [ubiquinone] flavoprotein 1, mitochondrial
Tb927.5.3220:mRNA-p1	Tb927.5.3220:mRNA-p1	signal peptidase type I, putative	4	23.6	23.706	208	208	-0.00277494	0.684196	1792	1218	-0.557057	signal peptidase type I, putative
Tb927.11.12840:mRNA-p1	Tb927.11.12840:mRNA-p1	Domain of unknown function (DUF4486), putative	18	5.7	434.42	3963	3963	-0.00277494	0.683896	1793	2059	0.199568	Domain of unknown function (DUF4486), putative
Tb927.9.5190:mRNA-p1	Tb927.9.5190:mRNA-p1	proliferative cell nuclear antigen (PCNA), putative	16	65.8	32.314	292	292	-0.00277494	0.683653	1794	552	-1.70044	proliferative cell nuclear antigen (PCNA), putative
Tb927.11.8060:mRNA-p1	Tb927.11.8060:mRNA-p1	SNARE associated Golgi protein, putative	7	16.4	63.596	573	573	-0.00277494	0.683605	1795	980	-0.87313	SNARE associated Golgi protein, putative
Tb927.5.2410:mRNA-p1	Tb927.5.2410:mRNA-p1	kinesin, putative	26	23.7	149.64	1339	1339	-0.00277494	0.683079	1796	1154	-0.638144	kinesin, putative
Tb927.7.4900:mRNA-p1;Tb11.v5.0171.1-p1	Tb927.7.4900:mRNA-p1;Tb11.v5.0171.1-p1	5-3 exoribonuclease A	53;53	42.3	158.67	1418	1418;1418	-0.00277494	0.683056	1797	1337	-0.426591	5-3 exoribonuclease A
Tb927.7.6650:mRNA-p1	Tb927.7.6650:mRNA-p1	Colon cancer-associated protein Mic1-like, putative	12	15	118.42	1069	1069	-0.00277494	0.683018	1798	4338	1.27064	Colon cancer-associated protein Mic1-like, putative
Tb927.10.6010:mRNA-p1;Tb11.v5.0195.1-p1	Tb927.10.6010:mRNA-p1;Tb11.v5.0195.1-p1	Cohesin subunit SCC3, putative	8;7	7.2	128.01	1164	1164;1043	-0.00277494	0.682337	1799	1300	-0.468684	Cohesin subunit SCC3, putative
Tb927.8.6140:mRNA-p1	Tb927.8.6140:mRNA-p1	Galactose oxidase, central domain/Kelch motif containing protein, putative	5	17.6	44.153	392	392	-0.00277494	0.681392	1800	5442	1.59614	Galactose oxidase, central domain/Kelch motif containing protein, putative
Tb927.9.11850:mRNA-p1	Tb927.9.11850:mRNA-p1	structural maintenance of chromosome 1, putative	29	27.5	144.54	1275	1275	-0.00277494	0.681211	1801	1338	-0.42872	structural maintenance of chromosome 1, putative
Tb927.11.1010:mRNA-p1	Tb927.11.1010:mRNA-p1	chaperone protein DnaJ, putative	5	20.5	41.739	371	371	-0.00277494	0.680408	1802	4532	1.33055	chaperone protein DnaJ, putative
Tb927.8.1440:mRNA-p1	Tb927.8.1440:mRNA-p1	maoC-like dehydratase, putative	2	21	17.815	162	162	-0.00277494	0.679972	1803	1665	-0.114877	maoC-like dehydratase, putative
Tb927.9.2060:mRNA-p1	Tb927.9.2060:mRNA-p1	ADP-ribosylation factor family, putative	7	28.9	37.972	353	353	-0.00277494	0.679942	1804	5161	1.51645	ADP-ribosylation factor family, putative
Tb927.3.1200.2:mRNA-p1;Tb927.3.1200.1:mRNA-p1	Tb927.3.1200.2:mRNA-p1	hypothetical protein, conserved	17;7	32.6	83.763	773	773;263	-0.00277494	0.678439	1805	1307	-0.46574	hypothetical protein, conserved
Tb927.9.12770:mRNA-p1	Tb927.9.12770:mRNA-p1	Kinetoplast polyadenylation factor 3	11	14.7	116.54	1022	1022	-0.00277494	0.677565	1806	3606	0.997602	Kinetoplast polyadenylation factor 3
Tb927.10.5230:mRNA-p1;Tb11.v5.0234.1-p1	Tb927.10.5230:mRNA-p1	ADP-ribosylation factor-like protein 13, putative	5;2	21.9	30.327	270	270;186	-0.00277494	0.676353	1807	1568	-0.204671	ADP-ribosylation factor-like protein 13, putative
Tb927.11.13340:mRNA-p1	Tb927.11.13340:mRNA-p1	hypothetical protein, conserved	4	5.9	88.553	819	819	-0.00277494	0.675709	1808	4198	1.21531	hypothetical protein, conserved
Tb927.8.4770:mRNA-p1	Tb927.8.4770:mRNA-p1	small GTP-binding protein Rab18	11	48.8	23.467	215	215	-0.00277494	0.675207	1809	1758	-0.0412573	small GTP-binding protein Rab18
Tb927.6.2440:mRNA-p1	Tb927.6.2440:mRNA-p1	Mo25-like, putative	13	45.4	42.805	388	388	-0.00277494	0.674694	1810	3152	0.800278	Mo25-like, putative
Tb927.11.2440:mRNA-p1	Tb927.11.2440:mRNA-p1	Tubulin cofactor C domain-containing protein 1	6	12.6	59.28	540	540	-0.00277494	0.674546	1811	3308	0.869173	Tubulin cofactor C domain-containing protein 1
Tb927.10.8390:mRNA-p1	Tb927.10.8390:mRNA-p1	Concanavalin A-like lectin/glucanases superfamily/SPRY domain/HECT-domain (ubiquitin-transferase), putative	5	1.7	415.93	3721	3721	-0.00277494	0.672917	1812	4017	1.14854	Concanavalin A-like lectin/glucanases superfamily/SPRY domain/HECT-domain (ubiquitin-transferase), putative
Tb927.3.1190:mRNA-p1	Tb927.3.1190:mRNA-p1	hypothetical protein, conserved	33	15.6	256.09	2327	2327	-0.00277494	0.672821	1813	2475	0.44905	hypothetical protein, conserved
Tb927.3.4330:mRNA-p1;Tb927.3.4320:mRNA-p1;Tb927.3.4310:mRNA-p1;Tb927.3.4300:mRNA-p1;Tb927.3.4290:mRNA-p1;Tb11.v5.1055.1-p1	Tb927.3.4330:mRNA-p1;Tb927.3.4320:mRNA-p1;Tb927.3.4310:mRNA-p1;Tb927.3.4300:mRNA-p1;Tb927.3.4290:mRNA-p1;Tb11.v5.1055.1-p1	Paraflagellar rod protein 1-5	45;45;45;45;45;45	72.3	68.682	589	589;589;589;589;589;589	-0.00277494	0.670795	1814	55	-5.0436	Paraflagellar rod protein 1-5
Tb927.5.1300:mRNA-p1	Tb927.5.1300:mRNA-p1	V-type proton ATPase subunit a, putative	12	17.1	89.63	783	783	-0.00277494	0.67055	1815	759	-1.2578	V-type proton ATPase subunit a, putative
Tb927.11.960:mRNA-p1	Tb927.11.960:mRNA-p1	ATPase, putative	5	11.1	71.189	657	657	-0.00277494	0.669613	1816	6375	1.81166	ATPase, putative
Tb927.7.210:mRNA-p1	Tb927.7.210:mRNA-p1	Proline dehydrogenase, mitochondrial	13	29.1	63.858	556	556	-0.00277494	0.669102	1817	1714	-0.0841913	Proline dehydrogenase, mitochondrial
Tb927.4.1870:mRNA-p1	Tb927.4.1870:mRNA-p1	Serine/threonine-protein phosphatase 2A catalytic subunit, putative	5	12.9	46.97	426	426	-0.00277494	0.668053	1818	2094	0.203909	Serine/threonine-protein phosphatase 2A catalytic subunit, putative
Tb927.8.650:mRNA-p1	Tb927.8.650:mRNA-p1	cation-transporting ATPase, putative	24	23.5	140.4	1261	1261	-0.00277494	0.667634	1819	880	-1.04757	cation-transporting ATPase, putative
Tb927.10.13790:mRNA-p1	Tb927.10.13790:mRNA-p1	hypothetical protein, conserved	19	27.2	74.674	680	680	-0.00277494	0.666867	1820	403	-2.17509	hypothetical protein, conserved
Tb927.10.11300:mRNA-p1	Tb927.10.11300:mRNA-p1	paraflagellar rod component, putative	7	52.4	14.328	126	126	-0.00277494	0.666721	1821	219	-3.05573	paraflagellar rod component, putative
Tb927.11.15070:mRNA-p1	Tb927.11.15070:mRNA-p1	Basal body protein	8	10	119.15	1076	1076	-0.00277494	0.666442	1822	3851	1.07971	Basal body protein
Tb927.1.670:mRNA-p1	Tb927.1.670:mRNA-p1	conserved protein, unknown function	13	30.6	65.781	614	614	-0.00277494	0.665915	1823	2745	0.590492	conserved protein, unknown function
Tb927.10.13860:mRNA-p1	Tb927.10.13860:mRNA-p1	GPI-anchor transamidase subunit 8 (GPI8)	11	50.5	36.798	319	319	-0.00277494	0.665172	1824	1604	-0.185432	GPI-anchor transamidase subunit 8 (GPI8)
Tb927.8.7950:mRNA-p1	Tb927.8.7950:mRNA-p1	Flagellar Member 4	27	18.5	191.21	1747	1747	-0.00277494	0.664754	1825	1739	-0.0696385	Flagellar Member 4
Tb927.11.14110:mRNA-p1	Tb927.11.14110:mRNA-p1	TFIIH basal transcription factor subunit	9	30.7	49.095	436	436	-0.00277494	0.663208	1826	5840	1.67728	TFIIH basal transcription factor subunit
Tb927.10.6070:mRNA-p1	Tb927.10.6070:mRNA-p1	universal minicircle sequence binding protein 1	2	19.3	14.566	140	140	-0.00277494	0.662167	1827	298	-2.61609	universal minicircle sequence binding protein 1
Tb927.9.11250:mRNA-p1	Tb927.9.11250:mRNA-p1	predicted WD40 repeat protein	2	8.8	50.67	444	444	-0.00277494	0.661688	1828	5364	1.55304	predicted WD40 repeat protein
Tb927.8.2200:mRNA-p1	Tb927.8.2200:mRNA-p1	terbinafine resistance locus protein (yip1), putative	2	20.1	20.718	189	189	-0.00277494	0.661258	1829	1660	-0.139872	terbinafine resistance locus protein (yip1), putative
Tb927.10.1310:mRNA-p1	Tb927.10.1310:mRNA-p1	Domain of unknown function (DUF4042), putative	7	10.5	102.74	944	944	-0.00277494	0.660859	1830	4618	1.33542	Domain of unknown function (DUF4042), putative
Tb927.11.1710:mRNA-p1	Tb927.11.1710:mRNA-p1	guide RNA-binding protein of 21 kDa	9	52.4	23.253	206	206	-0.00277494	0.660619	1831	1164	-0.653541	guide RNA-binding protein of 21 kDa
Tb927.2.4530:mRNA-p1	Tb927.2.4530:mRNA-p1	hypothetical protein, conserved	6	38.4	25.526	237	237	-0.00277494	0.659625	1832	2056	0.166421	hypothetical protein, conserved
Tb927.2.2950:mRNA-p1	Tb927.2.2950:mRNA-p1	Nop14-like family, putative	16	20.6	105.08	955	955	-0.00277494	0.658495	1833	3054	0.736493	Nop14-like family, putative
Tb927.11.2130:mRNA-p1	Tb927.11.2130:mRNA-p1	proteasome regulatory non-ATP-ase subunit 3	17	53.6	38.167	334	334	-0.00277494	0.657738	1834	918	-0.998428	proteasome regulatory non-ATP-ase subunit 3
Tb927.1.2390:mRNA-p1;Tb927.1.2370:mRNA-p1;Tb927.1.2350:mRNA-p1;Tb927.1.2330:mRNA-p1;Tb11.v5.0469.1-p1;Tb927.1.2410:pseudogenic_transcript-p1	Tb927.1.2390:mRNA-p1;Tb927.1.2370:mRNA-p1;Tb927.1.2350:mRNA-p1;Tb927.1.2330:mRNA-p1;Tb11.v5.0469.1-p1;Tb927.1.2410:pseudogenic_transcript-p1	beta tubulin	32;32;32;32;32;21	78.5	49.704	442	442;442;442;442;442;300	-0.00277494	0.657504	1835	10	-7.51964	beta tubulin
Tb927.3.3060:mRNA-p1	Tb927.3.3060:mRNA-p1	hypothetical protein, conserved	7	48.4	32.297	304	304	-0.00277494	0.656763	1836	3996	1.12199	hypothetical protein, conserved
Tb927.11.10560:mRNA-p1	Tb927.11.10560:mRNA-p1	eukaryotic translation initiation factor 4 gamma 4	19	29.4	79.7	697	697	-0.00277494	0.656369	1837	1512	-0.280893	eukaryotic translation initiation factor 4 gamma 4
Tb927.9.10010:mRNA-p1	Tb927.9.10010:mRNA-p1	chaperone protein DnaJ, putative	10	28.2	56.711	490	490	-0.00277494	0.655178	1838	867	-1.08403	chaperone protein DnaJ, putative
Tb927.11.3190.2:mRNA-p1;Tb927.11.3190.1:mRNA-p1	Tb927.11.3190.2:mRNA-p1;Tb927.11.3190.1:mRNA-p1	hypothetical protein, conserved	20;19	13	184.71	1650	1650;1623	-0.00277494	0.65482	1839	3743	1.02527	hypothetical protein, conserved
Tb927.5.3310:mRNA-p1	Tb927.5.3310:mRNA-p1	hypothetical protein, conserved	3	13.2	38.109	357	357	-0.00277494	0.654153	1840	4561	1.30964	hypothetical protein, conserved
Tb927.6.4370:mRNA-p1	Tb927.6.4370:mRNA-p1	eukaryotic translation initiation factor 3 subunit d	15	35	57.974	506	506	-0.00277494	0.653624	1841	661	-1.47777	eukaryotic translation initiation factor 3 subunit d
Tb927.9.3820:mRNA-p1	Tb927.9.3820:mRNA-p1	syntaxin, putative	2	6.7	31.106	284	284	-0.00277494	0.652323	1842	1688	-0.125958	syntaxin, putative
Tb927.5.550:mRNA-p1	Tb927.5.550:mRNA-p1	V-type proton ATPase subunit D, putative	8	39.4	42.849	383	383	-0.00277494	0.651516	1843	1132	-0.703182	V-type proton ATPase subunit D, putative
Tb927.8.900:mRNA-p1	Tb927.8.900:mRNA-p1	splicing factor TSR1	7	24.1	37.469	328	328	-0.00277494	0.650871	1844	1192	-0.629454	splicing factor TSR1
Tb927.7.3500:mRNA-p1	Tb927.7.3500:mRNA-p1	Prostaglandin E synthase	10	45.2	35.436	312	312	-0.00277494	0.650849	1845	2243	0.281809	Prostaglandin E synthase
Tb927.3.4850:mRNA-p1	Tb927.3.4850:mRNA-p1	enoyl-CoA hydratase, mitochondrial precursor, putative	13	61.4	28.605	267	267	-0.00277494	0.64856	1846	4248	1.20238	enoyl-CoA hydratase, mitochondrial precursor, putative
Tb927.9.11300:mRNA-p1	Tb927.9.11300:mRNA-p1	Mitochondrial ribosomal protein S17	3	11.7	35.601	307	307	-0.00277494	0.646524	1847	5069	1.45652	Mitochondrial ribosomal protein S17
Tb927.11.4910:mRNA-p1	Tb927.11.4910:mRNA-p1	predicted ankyrin repeat family protein	17	50.8	43.647	392	392	-0.00277494	0.646187	1848	1027	-0.847529	predicted ankyrin repeat family protein
Tb927.10.740:mRNA-p1;Tb11.v5.0749.1-p1	Tb927.10.740:mRNA-p1	structural maintenance of chromosome 4, putative	21;5	15.2	154.7	1366	1366;368	-0.00277494	0.645678	1849	1911	0.0475826	structural maintenance of chromosome 4, putative
Tb927.8.7490:mRNA-p1	Tb927.8.7490:mRNA-p1	symplekin	2	2	157.97	1445	1445	-0.00277494	0.645088	1850	1383	-0.419724	symplekin
Tb927.9.10960:mRNA-p1	Tb927.9.10960:mRNA-p1	ATP-dependent DEAD/H RNA helicase, putative	11	15.5	80.446	701	701	-0.00277494	0.644478	1851	5286	1.51387	ATP-dependent DEAD/H RNA helicase, putative
Tb927.9.8350:mRNA-p1	Tb927.9.8350:mRNA-p1	hypothetical protein, conserved	6	12.7	66.853	604	604	-0.00277494	0.64388	1852	2052	0.147947	hypothetical protein, conserved
Tb927.4.2400:mRNA-p1	Tb927.4.2400:mRNA-p1	hypothetical protein, conserved	10	10.2	161.24	1467	1467	-0.00277494	0.643825	1853	3150	0.765489	hypothetical protein, conserved
Tb927.7.3100:mRNA-p1	Tb927.7.3100:mRNA-p1	hypothetical protein, conserved	17	33.1	69.706	608	608	-0.00277494	0.642827	1854	7036	1.92411	hypothetical protein, conserved
Tb927.10.8170:mRNA-p1	Tb927.10.8170:mRNA-p1	Nucleoporin NUP144	40	40.6	144.37	1325	1325	-0.00277494	0.642721	1855	1024	-0.857203	Nucleoporin NUP144
Tb927.10.5370:mRNA-p1;Tb927.10.5360:mRNA-p1	Tb927.10.5370:mRNA-p1;Tb927.10.5360:mRNA-p1	40S ribosomal protein S10, putative	14;14	59.3	19.285	172	172;172	-0.00277494	0.64248	1856	444	-2.06357	40S ribosomal protein S10, putative
Tb927.8.3150:mRNA-p1	Tb927.8.3150:mRNA-p1	T-complex protein 1, gamma subunit, putative	33	64.2	60.817	556	556	-0.00277494	0.641914	1857	242	-2.93989	T-complex protein 1, gamma subunit, putative
Tb927.10.8270:mRNA-p1;Tb927.10.8290:mRNA-p1;Tb11.v5.0877.1-p1	Tb927.10.8270:mRNA-p1;Tb927.10.8290:mRNA-p1;Tb11.v5.0877.1-p1	eukaryotic translation initiation factor 3 subunit c	23;23;14	33.1	84.339	740	740;740;490	-0.00277494	0.641524	1858	712	-1.3838	eukaryotic translation initiation factor 3 subunit c
Tb927.2.3580:mRNA-p1	Tb927.2.3580:mRNA-p1	transcription elongation factor s-II, putative	24	65.5	52.172	467	467	-0.00277494	0.641422	1859	876	-1.08552	transcription elongation factor s-II, putative
Tb927.5.4270:mRNA-p1	Tb927.5.4270:mRNA-p1	ATP-dependent DEAD/H RNA helicase, putative	17	24.3	93.954	828	828	-0.00277494	0.641077	1860	3790	1.0269	ATP-dependent DEAD/H RNA helicase, putative
Tb927.10.2940:mRNA-p1	Tb927.10.2940:mRNA-p1	Soluble NSF attachment protein, SNAP, putative	8	31.4	38.468	354	354	-0.00277494	0.640557	1861	1798	-0.049685	Soluble NSF attachment protein, SNAP, putative
Tb927.4.770:mRNA-p1	Tb927.4.770:mRNA-p1	ubiquitin-protein ligase, putative	13	11.8	142.06	1286	1286	-0.00277494	0.639935	1862	3962	1.08938	ubiquitin-protein ligase, putative
Tb927.11.6300:mRNA-p1	Tb927.11.6300:mRNA-p1	40S ribosomal protein S5, putative	19	72.1	21.386	190	190	-0.00277494	0.639668	1863	365	-2.35166	40S ribosomal protein S5, putative
Tb10.v4.0033:mRNA-p1;Tb927.10.4430:mRNA-p1;Tb11.v5.0767.1-p1	Tb10.v4.0033:mRNA-p1;Tb927.10.4430:mRNA-p1;Tb11.v5.0767.1-p1	pumillo RNA binding protein PUF1	28;28;22	57.9	63.851	572	572;572;503	-0.00277494	0.639533	1864	1375	-0.43897	pumillo RNA binding protein PUF1
Tb927.8.6930:mRNA-p1	Tb927.8.6930:mRNA-p1	serine/threonine-protein kinase NRKB, putative	5	14.6	47.915	431	431	-0.00277494	0.63916	1865	2021	0.115894	serine/threonine-protein kinase NRKB, putative
Tb927.1.4490:mRNA-p1	Tb927.1.4490:mRNA-p1	acetyltransferase, putative	7	36.6	19.682	172	172	-0.00277494	0.638733	1866	1119	-0.737739	acetyltransferase, putative
Tb927.6.560:mRNA-p1	Tb927.6.560:mRNA-p1	cysteine peptidase C (CPC)	12	64.7	37.223	340	340	-0.00277494	0.638654	1867	2332	0.320846	cysteine peptidase C (CPC)
Tb927.2.450:mRNA-p1	Tb927.2.450:mRNA-p1	retrotransposon hot spot protein 4 (RHS4), putative	6	9	97.997	857	857	-0.00277494	0.637594	1868	1104	-0.758754	retrotransposon hot spot protein 4 (RHS4), putative
Tb927.10.12700:mRNA-p1	Tb927.10.12700:mRNA-p1	pyruvate dehydrogenase E1 alpha subunit, putative	20	65.9	42.511	378	378	-0.00277494	0.636356	1869	447	-2.06392	pyruvate dehydrogenase E1 alpha subunit, putative
Tb927.11.14560:mRNA-p1	Tb927.11.14560:mRNA-p1	Cleavage and polyadenylation specificity factor CPSF160, putative	57	44.4	159.06	1452	1452	-0.00277494	0.636034	1870	1712	-0.127356	Cleavage and polyadenylation specificity factor CPSF160, putative
Tb927.7.5020:mRNA-p1;Tb927.7.5000:mRNA-p1;Tb11.v5.0182.1-p1;Tb11.v5.0181.1-p1	Tb927.7.5020:mRNA-p1;Tb927.7.5000:mRNA-p1;Tb11.v5.0182.1-p1;Tb11.v5.0181.1-p1	60S ribosomal protein L19, putative	21;21;21;21	38.8	29.408	260	260;260;260;260	-0.00277494	0.6357	1871	491	-1.93001	60S ribosomal protein L19, putative
Tb927.8.3710:mRNA-p1	Tb927.8.3710:mRNA-p1	exonuclease, putative	11	25	84.503	789	789	-0.00277494	0.63519	1872	2775	0.567907	exonuclease, putative
Tb927.10.8330:mRNA-p1	Tb927.10.8330:mRNA-p1	S. cerevisiae PSP1 homologue, putative	7	43.8	26.821	235	235	-0.00277494	0.635108	1873	4441	1.24553	S. cerevisiae PSP1 homologue, putative
Tb927.4.800:mRNA-p1;Tb11.v5.0793.1-p1	Tb927.4.800:mRNA-p1	target of rapamycin kinase 3, putative	27;5	10.8	291.1	2595	2595;611	-0.00277494	0.63478	1874	2909	0.634402	target of rapamycin kinase 3, putative
Tb927.8.3660:mRNA-p1	Tb927.8.3660:mRNA-p1	protein transport protein SEC23	29	35	106.63	969	969	-0.00277494	0.63447	1875	1921	0.0349669	protein transport protein SEC23
Tb927.11.8440.1:mRNA-p1;Tb927.11.8440.2:mRNA-p1	Tb927.11.8440.1:mRNA-p1;Tb927.11.8440.2:mRNA-p1	haloacid dehalogenase-like hydrolase, putative	11;11	61.9	30.596	278	278;287	-0.00277494	0.633834	1876	872	-1.10526	haloacid dehalogenase-like hydrolase, putative
Tb927.11.13050:mRNA-p1;Tb927.11.13040:mRNA-p1;Tb927.11.13030:mRNA-p1;Tb927.11.13020:mRNA-p1	Tb927.11.13050:mRNA-p1;Tb927.11.13040:mRNA-p1;Tb927.11.13030:mRNA-p1;Tb927.11.13020:mRNA-p1	calmodulin	8;8;8;8	66.4	16.838	149	149;149;149;149	-0.00277494	0.633411	1877	71	-4.72447	calmodulin
Tb927.8.5400:mRNA-p1	Tb927.8.5400:mRNA-p1	hypothetical protein, conserved	112	79	108.87	941	941	-0.00277494	0.633002	1878	3732	0.990752	hypothetical protein, conserved
Tb927.5.4470:mRNA-p1;Tb05.5K5.120:mRNA-p1	Tb927.5.4470:mRNA-p1;Tb05.5K5.120:mRNA-p1	hypothetical protein, conserved	6;6	8.5	95.764	845	845;845	-0.00277494	0.632839	1879	2685	0.514957	hypothetical protein, conserved
Tb927.7.6180:mRNA-p1	Tb927.7.6180:mRNA-p1	hypothetical protein, conserved	10	47.8	29.957	278	278	-0.00277494	0.631323	1880	2839	0.59465	hypothetical protein, conserved
Tb927.11.12380:mRNA-p1	Tb927.11.12380:mRNA-p1	hypothetical protein, conserved	11	38.2	46.26	414	414	-0.00277494	0.629283	1881	3065	0.704387	hypothetical protein, conserved
Tb927.8.5760:mRNA-p1	Tb927.8.5760:mRNA-p1	Ankyrin repeats (many copies)/Alpha/beta hydrolase family, putative	15	31.6	53.809	478	478	-0.00277494	0.629	1882	1121	-0.74748	Ankyrin repeats (many copies)/Alpha/beta hydrolase family, putative
Tb927.2.2210:mRNA-p1	Tb927.2.2210:mRNA-p1	hypothetical protein, conserved	9	11.6	113.45	1039	1039	-0.00277494	0.628445	1883	5970	1.6647	hypothetical protein, conserved
Tb927.10.4120.2:mRNA-p1;Tb927.10.4110:mRNA-p1;Tb927.10.4120.1:mRNA-p1	Tb927.10.4120.2:mRNA-p1;Tb927.10.4110:mRNA-p1;Tb927.10.4120.1:mRNA-p1	60S ribosomal protein L30	13;13;13	81.9	11.512	105	105;105;114	-0.00277494	0.625791	1884	384	-2.29462	60S ribosomal protein L30
Tb927.11.12150:mRNA-p1	Tb927.11.12150:mRNA-p1	flagellar pocket cytoskeletal protein bilbo1	47	69.8	67.325	587	587	-0.00277494	0.625159	1885	881	-1.09735	flagellar pocket cytoskeletal protein bilbo1
Tb927.10.8850:mRNA-p1	Tb927.10.8850:mRNA-p1	A distinct subfamily of CDD/CDA-like deaminases, putative	11	24.6	65.888	585	585	-0.00277494	0.6249	1886	4134	1.13221	A distinct subfamily of CDD/CDA-like deaminases, putative
Tb927.5.1810:mRNA-p1;Tb927.5.1830:mRNA-p1	Tb927.5.1810:mRNA-p1;Tb927.5.1830:mRNA-p1	lysosomal/endosomal membrane protein p67	14;13	28.7	72.732	659	659;661	-0.00277494	0.623947	1887	362	-2.38203	lysosomal/endosomal membrane protein p67
Tb927.2.5240:mRNA-p1	Tb927.2.5240:mRNA-p1	pre-mRNA splicing factor 19	17	48.9	54.268	509	509	-0.00277494	0.62299	1888	1489	-0.342515	pre-mRNA splicing factor 19
Tb927.11.3290:mRNA-p1	Tb927.11.3290:mRNA-p1	Tripartite attachment complex protein 166	22	17.3	166.26	1501	1501	-0.00277494	0.622396	1889	1618	-0.223411	Tripartite attachment complex protein 166
Tb927.11.5440:mRNA-p1	Tb927.11.5440:mRNA-p1	NADP-dependent malic enzyme, cytosolic	24	45.7	61.506	564	564	-0.00277494	0.621259	1890	398	-2.24755	NADP-dependent malic enzyme, cytosolic
Tb927.11.10230:mRNA-p1	Tb927.11.10230:mRNA-p1	RNA polymerase-associated protein CDC73, putative	10	40.7	40.486	361	361	-0.00277494	0.621007	1891	2721	0.524988	RNA polymerase-associated protein CDC73, putative
Tb927.6.1280:mRNA-p1	Tb927.6.1280:mRNA-p1	translation initiation factor EIF-2b alpha subunit, putative	10	36.8	33.095	299	299	-0.00277494	0.620701	1892	3808	1.00912	translation initiation factor EIF-2b alpha subunit, putative
Tb927.3.5140:mRNA-p1	Tb927.3.5140:mRNA-p1	exonuclease, putative	4	5.8	83.695	762	762	-0.00277494	0.620309	1893	5683	1.58598	exonuclease, putative
Tb927.5.1120:mRNA-p1	Tb927.5.1120:mRNA-p1	Phage tail fibre repeat, putative	8	13.7	655.92	6062	6062	-0.00277494	0.619053	1894	2034	0.102883	Phage tail fibre repeat, putative
Tb927.10.15850:mRNA-p1;Tb11.v5.0427.1-p1	Tb927.10.15850:mRNA-p1;Tb11.v5.0427.1-p1	Peroxisome biogenesis factor 12	9;9	28.1	43.172	395	395;395	-0.00277494	0.618344	1895	1781	-0.0895103	Peroxisome biogenesis factor 12
Tb927.11.9220:mRNA-p1	Tb927.11.9220:mRNA-p1	proteasome regulatory non-ATP-ase subunit 2	27	31.8	106.51	977	977	-0.00277494	0.618261	1896	928	-1.03076	proteasome regulatory non-ATP-ase subunit 2
Tb927.4.5000:mRNA-p1;Tb927.8.7420:mRNA-p1;Tb11.v5.0696.1-p1	Tb927.4.5000:mRNA-p1;Tb927.8.7420:mRNA-p1;Tb11.v5.0696.1-p1	TerD domain containing protein, putative	5;5;3	7	96.392	859	859;859;501	-0.00277494	0.618192	1897	1706	-0.153102	TerD domain containing protein, putative
Tb927.6.4230:mRNA-p1	Tb927.6.4230:mRNA-p1	hypothetical protein, conserved	20	42.2	55.213	500	500	-0.00277494	0.617931	1898	3938	1.05298	hypothetical protein, conserved
Tb927.8.6860:mRNA-p1	Tb927.8.6860:mRNA-p1	High-temperature-induced dauer-formation protein, putative	3	4.9	81.647	748	748	-0.00277494	0.617327	1899	5500	1.53419	High-temperature-induced dauer-formation protein, putative
Tb927.9.11840:mRNA-p1	Tb927.9.11840:mRNA-p1	pre-rRNA-processing protein PNO1, putative	4	19.4	24.075	217	217	-0.00277494	0.615541	1900	3285	0.789894	pre-rRNA-processing protein PNO1, putative
Tb927.6.1410:mRNA-p1	Tb927.6.1410:mRNA-p1	NADH dehydrogenase (ubiquinone) 1 alpha subcomplex subunit, putative	14	55	27.154	229	229	-0.00277494	0.615187	1901	5629	1.56612	NADH dehydrogenase (ubiquinone) 1 alpha subcomplex subunit, putative
Tb927.3.3580:mRNA-p1	Tb927.3.3580:mRNA-p1	heat shock protein 90, putative	24	29.4	87.766	773	773	-0.00277494	0.615116	1902	288	-2.72338	heat shock protein 90, putative
Tb927.9.6250:mRNA-p1	Tb927.9.6250:mRNA-p1	arginine kinase	3	4.3	41.597	370	370	-0.00277494	0.613527	1903	105	-4.17981	arginine kinase
Tb927.8.2310:mRNA-p1	Tb927.8.2310:mRNA-p1	(H+)-ATPase G subunit, putative	6	47.7	12.749	109	109	-0.00277494	0.612258	1904	2273	0.255564	(H+)-ATPase G subunit, putative
Tb927.3.3230:mRNA-p1	Tb927.3.3230:mRNA-p1	NOL1/NOP2/sun family, putative	4	11.2	67.414	609	609	-0.00277494	0.611682	1905	3175	0.736966	NOL1/NOP2/sun family, putative
Tb927.10.570:mRNA-p1;Tb11.v5.0581.1-p1	Tb927.10.570:mRNA-p1;Tb11.v5.0581.1-p1	Sec8 exocyst complex component specific domain containing protein, putative	10;7	7.1	185.76	1685	1685;1152	-0.00277494	0.61083	1906	3659	0.940901	Sec8 exocyst complex component specific domain containing protein, putative
Tb927.2.4130:mRNA-p1	Tb927.2.4130:mRNA-p1	enoyl-CoA hydratase/Enoyl-CoA isomerase/3-hydroxyacyl-CoA dehydrogenase, putative	27	38.6	88.9	803	803	-0.00277494	0.610788	1907	1842	-0.0500318	enoyl-CoA hydratase/Enoyl-CoA isomerase/3-hydroxyacyl-CoA dehydrogenase, putative
Tb927.11.13250:mRNA-p1	Tb927.11.13250:mRNA-p1	eukaryotic translation initiation factor 2 gamma, putative	10	33.5	52.2	477	477	-0.00277494	0.610702	1908	637	-1.5827	eukaryotic translation initiation factor 2 gamma, putative
Tb927.11.11280:mRNA-p1;Tb11.v5.1041.1-p1	Tb927.11.11280:mRNA-p1	hypothetical protein, conserved	22;8	22.5	120.86	1040	1040;484	-0.00277494	0.609553	1909	2184	0.194156	hypothetical protein, conserved
Tb927.4.2280:mRNA-p1	Tb927.4.2280:mRNA-p1	hypothetical protein, conserved	13	44	42.285	382	382	-0.00277494	0.608881	1910	1894	-0.0121363	hypothetical protein, conserved
Tb927.7.7050:mRNA-p1	Tb927.7.7050:mRNA-p1	hypothetical protein, conserved	16	22.5	104.48	965	965	-0.00277494	0.60856	1911	2315	0.276684	hypothetical protein, conserved
Tb927.10.13710:mRNA-p1	Tb927.10.13710:mRNA-p1	Activator of Hsp90 ATPase, N-terminal/Activator of Hsp90 ATPase homolog 1-like protein, putative	9	36.9	37.612	331	331	-0.00277494	0.608422	1912	859	-1.15435	Activator of Hsp90 ATPase, N-terminal/Activator of Hsp90 ATPase homolog 1-like protein, putative
Tb927.8.4210:mRNA-p1	Tb927.8.4210:mRNA-p1	basal body component, putative	9	31	46.138	419	419	-0.00277494	0.608176	1913	893	-1.0991	basal body component, putative
Tb927.7.3180:mRNA-p1	Tb927.7.3180:mRNA-p1	adaptor complex AP-1 medium subunit, putative	30	65.7	49.235	432	432	-0.00277494	0.607416	1914	799	-1.26032	adaptor complex AP-1 medium subunit, putative
Tb927.6.3560:mRNA-p1	Tb927.6.3560:mRNA-p1	hypothetical protein, conserved	4	3	168.09	1482	1482	-0.00277494	0.606086	1915	6800	1.82819	hypothetical protein, conserved
Tb927.3.3280:mRNA-p1	Tb927.3.3280:mRNA-p1	vacuolar protein sorting-associated protein 4, putative	11	30.4	49.692	444	444	-0.00277494	0.605912	1916	1903	-0.009822	vacuolar protein sorting-associated protein 4, putative
Tb927.8.5140:mRNA-p1	Tb927.8.5140:mRNA-p1	diacylglycerol kinase, putative	2	6.6	62.699	575	575	-0.00277494	0.605701	1917	2546	0.409382	diacylglycerol kinase, putative
Tb927.11.550:mRNA-p1	Tb927.11.550:mRNA-p1	hypothetical protein SCD6.10	25	79.6	31.292	280	280	-0.00277494	0.605421	1918	406	-2.24005	hypothetical protein SCD6.10
Tb927.10.11850:mRNA-p1	Tb927.10.11850:mRNA-p1	WD domain, G-beta repeat, putative	2	2.6	111.8	1104	1104	-0.00277494	0.605223	1919	4623	1.26847	WD domain, G-beta repeat, putative
Tb927.7.7160:mRNA-p1	Tb927.7.7160:mRNA-p1	kinetoplastid-specific dual specificity phosphatase, putative	11	12.1	102.21	966	966	-0.00277494	0.604832	1920	4298	1.16256	kinetoplastid-specific dual specificity phosphatase, putative
Tb927.10.14990:mRNA-p1	Tb927.10.14990:mRNA-p1	intraflagellar transport protein 80	43	59.1	86.676	782	782	-0.00277494	0.604747	1921	958	-1.00376	intraflagellar transport protein 80
Tb927.9.8050:mRNA-p1	Tb927.9.8050:mRNA-p1	Protein of unknown function (DUF974), putative	3	8.5	58.484	541	541	-0.00277494	0.604539	1922	3218	0.743556	Protein of unknown function (DUF974), putative
Tb927.10.9240:mRNA-p1	Tb927.10.9240:mRNA-p1	Tir chaperone protein (CesT) family, putative	14	47.7	39.755	365	365	-0.00277494	0.603895	1923	2514	0.386626	Tir chaperone protein (CesT) family, putative
Tb927.10.5440:mRNA-p1	Tb927.10.5440:mRNA-p1	RNA editing endoribonuclease	4	9.5	60.838	538	538	-0.00277494	0.60373	1924	6560	1.76959	RNA editing endoribonuclease
Tb927.10.840:mRNA-p1;Tb11.v5.0753.1-p1	Tb927.10.840:mRNA-p1;Tb11.v5.0753.1-p1	Flagellum attachment zone protein 6	27;14	18.7	195.48	1719	1719;708	-0.00277494	0.603345	1925	942	-1.03106	Flagellum attachment zone protein 6
Tb927.10.14870:mRNA-p1	Tb927.10.14870:mRNA-p1	hypothetical protein, conserved	9	19.4	75.914	681	681	-0.00277494	0.601173	1926	3609	0.905991	hypothetical protein, conserved
Tb927.10.8940:mRNA-p1	Tb927.10.8940:mRNA-p1	flagellum targeting protein kharon1, putative	31	76.9	45.398	411	411	-0.00277494	0.60056	1927	104	-4.2117	flagellum targeting protein kharon1, putative
Tb927.10.10410:mRNA-p1;Tb11.v5.0535.1-p1	Tb927.10.10410:mRNA-p1	DNA replication licensing factor MCM8, putative	4;1	7	77.53	711	711;474	-0.00277494	0.599901	1928	6219	1.68958	DNA replication licensing factor MCM8, putative
Tb927.10.8890:mRNA-p1	Tb927.10.8890:mRNA-p1	kinetoplast DNA-associated protein, putative	7	29.7	23.503	209	209	-0.00277494	0.599835	1929	2613	0.437854	kinetoplast DNA-associated protein, putative
Tb927.8.7780:mRNA-p1	Tb927.8.7780:mRNA-p1	hypothetical protein, conserved	22	37.2	91.831	822	822	-0.00277494	0.599802	1930	6752	1.80671	hypothetical protein, conserved
Tb927.2.5910:mRNA-p1;Tb927.10.15120:mRNA-p1	Tb927.2.5910:mRNA-p1;Tb927.10.15120:mRNA-p1	40S ribosomal protein S13, putative	18;18	64.2	17.309	151	151;151	-0.00277494	0.59932	1931	367	-2.3955	40S ribosomal protein S13, putative
Tb927.7.3970:mRNA-p1	Tb927.7.3970:mRNA-p1	hypothetical protein, conserved	4	15.9	35.334	320	320	-0.00277494	0.598665	1932	4777	1.30601	hypothetical protein, conserved
Tb927.10.16020:mRNA-p1	Tb927.10.16020:mRNA-p1	pre-RNA processing PIH1/Nop17, putative	2	14.4	38.883	353	353	-0.00277494	0.598485	1933	4573	1.2423	pre-RNA processing PIH1/Nop17, putative
Tb927.4.1630:mRNA-p1	Tb927.4.1630:mRNA-p1	ribosomal RNA processing protein 6	14	20.8	78.548	703	703	-0.00277494	0.598311	1934	2789	0.52816	ribosomal RNA processing protein 6
Tb927.8.2070:mRNA-p1;Tb927.8.2270:mRNA-p1	Tb927.8.2070:mRNA-p1;Tb927.8.2270:mRNA-p1	Present in the outer mitochondrial membrane proteome 39-1	2;0	11.1	21.799	199	199;199	-0.00277494	0.597862	1935	404	-2.25991	Present in the outer mitochondrial membrane proteome 39-1
Tb927.9.3480:mRNA-p1	Tb927.9.3480:mRNA-p1	U5Cwc21 small nuclear ribonucleoprotein	3	21.3	20.499	183	183	-0.00277494	0.597282	1936	5542	1.51733	U5Cwc21 small nuclear ribonucleoprotein
Tb927.10.10610:mRNA-p1	Tb927.10.10610:mRNA-p1	protein tyrosine phosphatase, putative	4	17	25.449	229	229	-0.00277494	0.597136	1937	2349	0.278223	protein tyrosine phosphatase, putative
Tb927.10.5430:mRNA-p1	Tb927.10.5430:mRNA-p1	Flagellar C1a complex subunit C1a-32, putative	3	9.6	32.616	281	281	-0.00277494	0.596973	1938	2837	0.549798	Flagellar C1a complex subunit C1a-32, putative
Tb927.11.6790:mRNA-p1	Tb927.11.6790:mRNA-p1	Nucleolar protein 89	19	27.9	89.011	781	781	-0.00277494	0.59531	1939	1954	0.0111177	Nucleolar protein 89
Tb927.9.12070:mRNA-p1	Tb927.9.12070:mRNA-p1	hypothetical protein, conserved	19	23.2	109.87	995	995	-0.00277494	0.595097	1940	1312	-0.564289	hypothetical protein, conserved
Tb927.8.3410:mRNA-p1	Tb927.8.3410:mRNA-p1	Inositol hexakisphosphate, putative	63	43.2	170.41	1518	1518	-0.00277494	0.594383	1941	1913	-0.0209632	Inositol hexakisphosphate, putative
Tb927.8.6810:mRNA-p1	Tb927.8.6810:mRNA-p1	STE/STE11 serine/threonine-protein kinase, putative	3	12	46.85	433	433	-0.00277494	0.593888	1942	3944	1.02212	STE/STE11 serine/threonine-protein kinase, putative
Tb927.5.1090:mRNA-p1	Tb927.5.1090:mRNA-p1	threonyl-tRNA synthetase, putative	34	48.2	90.983	799	799	-0.00277494	0.593868	1943	597	-1.70248	threonyl-tRNA synthetase, putative
Tb927.6.1980:mRNA-p1	Tb927.6.1980:mRNA-p1	LMBR1-like membrane protein, putative	4	7.7	65.749	583	583	-0.00277494	0.593561	1944	2296	0.240094	LMBR1-like membrane protein, putative
Tb927.5.3400:mRNA-p1	Tb927.5.3400:mRNA-p1	calcium-translocating P-type ATPase	43	47.4	110.32	1011	1011	-0.00277494	0.592372	1945	305	-2.67289	calcium-translocating P-type ATPase
Tb927.11.6070:mRNA-p1	Tb927.11.6070:mRNA-p1	hypothetical protein, conserved	4	13.5	43.467	384	384	-0.00277494	0.591568	1946	2364	0.280718	hypothetical protein, conserved
Tb927.9.8410:mRNA-p1	Tb927.9.8410:mRNA-p1	chaperone protein DnaJ, putative	22	44.8	49.366	460	460	-0.00277494	0.591342	1947	1184	-0.717584	chaperone protein DnaJ, putative
Tb927.7.5110:mRNA-p1	Tb927.7.5110:mRNA-p1	hypothetical protein, conserved	2	4.7	62.367	569	569	-0.00277494	0.590872	1948	3930	1.01254	hypothetical protein, conserved
Tb927.8.1540:mRNA-p1	Tb927.8.1540:mRNA-p1	hypothetical protein, conserved	5	6.4	97.778	890	890	-0.00277494	0.590525	1949	1629	-0.258747	hypothetical protein, conserved
Tb927.8.3380:mRNA-p1	Tb927.8.3380:mRNA-p1	succinate dehydrogenase iron-sulfur subunit	7	28.5	27.259	242	242	-0.00277494	0.589585	1950	2812	0.528122	succinate dehydrogenase iron-sulfur subunit
Tb927.8.4780:mRNA-p1	Tb927.8.4780:mRNA-p1	Flagellar Member 3	38	21	468.13	4151	4151	-0.00277494	0.589364	1951	358	-2.44618	Flagellar Member 3
Tb927.7.1300:mRNA-p1	Tb927.7.1300:mRNA-p1	protein disulfide isomerase, putative	20	53.1	41.939	377	377	-0.00277494	0.588543	1952	342	-2.51288	protein disulfide isomerase, putative
Tb927.11.9180:mRNA-p1	Tb927.11.9180:mRNA-p1	ADP-ribosylation factor GTPase activating protein, putative	10	44.3	31.714	291	291	-0.00277494	0.588246	1953	2032	0.0572085	ADP-ribosylation factor GTPase activating protein, putative
Tb927.8.540:mRNA-p1	Tb927.8.540:mRNA-p1	N-terminal region of Chorein, a TM vesicle-mediated sorter, putative	9	4.5	270.18	2443	2443	-0.00277494	0.587539	1954	7149	1.87131	N-terminal region of Chorein, a TM vesicle-mediated sorter, putative
Tb927.11.2430:mRNA-p1	Tb927.11.2430:mRNA-p1	Cytoplasmic dynein 2 heavy chain (DYNC2H2), putative	176	39.3	484.96	4307	4307	-0.00277494	0.587326	1955	287	-2.76805	Cytoplasmic dynein 2 heavy chain (DYNC2H2), putative
Tb927.6.4200:mRNA-p1	Tb927.6.4200:mRNA-p1	LSU ribosomal protein, mitochondrial, putative	6	19.8	50.398	444	444	-0.00277494	0.585898	1956	4412	1.17353	LSU ribosomal protein, mitochondrial, putative
Tb927.10.16170:mRNA-p1;Tb11.v5.0396.1-p1	Tb927.10.16170:mRNA-p1;Tb11.v5.0396.1-p1	potassium voltage-gated channel, putative	4;4	17.3	34.606	307	307;340	-0.00277494	0.585861	1957	5622	1.52244	potassium voltage-gated channel, putative
Tb927.4.4950:mRNA-p1	Tb927.4.4950:mRNA-p1	Nucleolar protein 61	2	6.7	61.287	570	570	-0.00277494	0.585213	1958	3165	0.692825	Nucleolar protein 61
Tb927.8.4570:mRNA-p1	Tb927.8.4570:mRNA-p1	Zinc finger, C3HC4 type (RING finger), putative	8	23.4	37.012	334	334	-0.00277494	0.584589	1959	2484	0.342548	Zinc finger, C3HC4 type (RING finger), putative
Tb927.5.2140:mRNA-p1	Tb927.5.2140:mRNA-p1	regulator of nonsense transcripts 1	41	59.9	93.324	842	842	-0.00277494	0.582578	1960	1740	-0.171766	regulator of nonsense transcripts 1
Tb927.8.3490:mRNA-p1	Tb927.8.3490:mRNA-p1	Gryzun, putative trafficking through Golgi, putative	6	7.8	120.39	1083	1083	-0.00277494	0.580523	1961	3336	0.76653	Gryzun, putative trafficking through Golgi, putative
Tb927.5.1060:mRNA-p1	Tb927.5.1060:mRNA-p1	mitochondrial processing peptidase, beta subunit, putative	17	48.3	54.122	489	489	-0.00277494	0.580143	1962	4632	1.23931	mitochondrial processing peptidase, beta subunit, putative
Tb927.9.3650:mRNA-p1	Tb927.9.3650:mRNA-p1	Kinesin-13 1	8	13.6	77.434	691	691	-0.00277494	0.579741	1963	4149	1.0797	Kinesin-13 1
Tb927.4.1250:mRNA-p1	Tb927.4.1250:mRNA-p1	peroxisome biogenesis factor 1, putative	32	44.2	99.586	911	911	-0.00277494	0.578227	1964	3226	0.715952	peroxisome biogenesis factor 1, putative
Tb11.v5.0517.1-p1;Tb927.11.4050:mRNA-p1	Tb11.v5.0517.1-p1;Tb927.11.4050:mRNA-p1	hypothetical protein, conserved	6;5	15.2	58.022	520	520;548	-0.00277494	0.578139	1965	5412	1.46163	hypothetical protein, conserved
Tb927.10.6170:mRNA-p1	Tb927.10.6170:mRNA-p1	hypothetical protein, conserved	3	2.5	163.96	1508	1508	-0.00277494	0.577907	1966	3800	0.950736	hypothetical protein, conserved
Tb927.3.3490:mRNA-p1	Tb927.3.3490:mRNA-p1	High mobility group protein TDP1	7	25.5	30.866	271	271	-0.00277494	0.575707	1967	462	-2.09003	High mobility group protein TDP1
Tb927.4.4310:mRNA-p1	Tb927.4.4310:mRNA-p1	Nucleoporin NUP64	21	38.5	64.234	623	623	-0.00277494	0.574019	1968	1812	-0.119147	Nucleoporin NUP64
Tb927.9.2600:mRNA-p1	Tb927.9.2600:mRNA-p1	hypothetical protein, conserved	5	31	24.515	229	229	-0.00277494	0.57343	1969	3004	0.609422	hypothetical protein, conserved
Tb927.10.7090:mRNA-p1	Tb927.10.7090:mRNA-p1	Alternative oxidase, mitochondrial	16	50.5	37.59	329	329	-0.00277494	0.573123	1970	210	-3.22973	Alternative oxidase, mitochondrial
Tb927.10.8060:mRNA-p1	Tb927.10.8060:mRNA-p1	SET domain containing protein, putative	6	15.5	51.643	457	457	-0.00277494	0.573094	1971	1832	-0.105508	SET domain containing protein, putative
Tb927.11.10880:mRNA-p1	Tb927.11.10880:mRNA-p1	hypothetical protein, conserved	6	23.7	48.493	431	431	-0.00277494	0.57271	1972	5014	1.3463	hypothetical protein, conserved
Tb927.5.2090:mRNA-p1	Tb927.5.2090:mRNA-p1	kinesin, putative	40	40.5	122.72	1088	1088	-0.00277494	0.572583	1973	792	-1.31682	kinesin, putative
Tb927.11.5230:mRNA-p1	Tb927.11.5230:mRNA-p1	hypothetical protein, conserved	14	57.9	25.968	235	235	-0.00277494	0.572054	1974	1506	-0.3904	hypothetical protein, conserved
Tb927.11.16970:mRNA-p1	Tb927.11.16970:mRNA-p1	protein phosphatase 4, putative	16	62	34.432	303	303	-0.00277494	0.571636	1975	1251	-0.658771	protein phosphatase 4, putative
Tb927.3.5070:mRNA-p1	Tb927.3.5070:mRNA-p1	hypothetical protein, conserved	20	36.7	70.365	645	645	-0.00277494	0.570949	1976	2239	0.180272	hypothetical protein, conserved
Tb927.9.13510:mRNA-p1;Tb11.v5.0807.1-p1	Tb927.9.13510:mRNA-p1;Tb11.v5.0807.1-p1	Poly(A)-specific ribonuclease PARN-3	18;17	38.4	70.77	623	623;566	-0.00277494	0.57032	1977	1664	-0.248657	Poly(A)-specific ribonuclease PARN-3
Tb927.7.7260:mRNA-p1;Tb11.v5.0835.1-p1	Tb927.7.7260:mRNA-p1;Tb11.v5.0835.1-p1	kinesin, putative	11;7	13	113.35	1041	1041;472	-0.00277494	0.569903	1978	3347	0.758826	kinesin, putative
Tb927.10.2810:mRNA-p1	Tb927.10.2810:mRNA-p1	hypothetical protein, conserved	14	46.4	38.589	338	338	-0.00277494	0.569269	1979	1080	-0.87374	hypothetical protein, conserved
Tb927.9.13610:mRNA-p1	Tb927.9.13610:mRNA-p1	helicase, putative	37	32.9	149.24	1330	1330	-0.00277494	0.569087	1980	1122	-0.819428	helicase, putative
Tb927.7.6090:mRNA-p1	Tb927.7.6090:mRNA-p1	eukaryotic translation initiation factor 3 subunit a	56	56.4	88.162	762	762	-0.00277494	0.56892	1981	532	-1.89673	eukaryotic translation initiation factor 3 subunit a
Tb927.6.820:mRNA-p1;Tb11.v5.0730.1-p1;Tb927.7.4730:mRNA-p1;Tb11.v5.0156.1-p1	Tb927.6.820:mRNA-p1	Pumilio homology domain family member 4	35;8;1;1	42.3	111.38	1033	1033;297;430;430	-0.00277494	0.568406	1982	2949	0.573269	Pumilio homology domain family member 4
Tb927.11.5840:mRNA-p1	Tb927.11.5840:mRNA-p1	Protein translation factor SUI1 homolog, putative	3	36.7	12.738	109	109	-0.00277494	0.567851	1983	2015	0.0230952	Protein translation factor SUI1 homolog, putative
Tb927.5.1870:mRNA-p1	Tb927.5.1870:mRNA-p1	Fidgetin, putative	17	24.1	96.728	887	887	-0.00277494	0.567417	1984	2902	0.548635	Fidgetin, putative
Tb927.8.1090:mRNA-p1	Tb927.8.1090:mRNA-p1	NPAPL	13	26	81.678	746	746	-0.00277494	0.566173	1985	2960	0.576458	NPAPL
Tb927.11.3250:mRNA-p1	Tb927.11.3250:mRNA-p1	dynein heavy chain, putative	109	23.6	531.18	4658	4658	-0.00277494	0.565963	1986	151	-3.71725	dynein heavy chain, putative
Tb927.8.5100:mRNA-p1	Tb927.8.5100:mRNA-p1	hypothetical protein, conserved	15	7	313.77	2880	2880	-0.00277494	0.565356	1987	739	-1.42695	hypothetical protein, conserved
Tb927.3.1400:mRNA-p1	Tb927.3.1400:mRNA-p1	alpha-tubulin N-acetyltransferase, putative	4	14.1	37.275	334	334	-0.00277494	0.565189	1988	4285	1.10798	alpha-tubulin N-acetyltransferase, putative
Tb927.9.15070:mRNA-p1	Tb927.9.15070:mRNA-p1	hypothetical protein, conserved	33	44.5	82.306	737	737	-0.00277494	0.564826	1989	1244	-0.677057	hypothetical protein, conserved
Tb927.10.11110:mRNA-p1	Tb927.10.11110:mRNA-p1	hypothetical protein, conserved	2	2.6	94.49	845	845	-0.00277494	0.564709	1990	6910	1.79592	hypothetical protein, conserved
Tb927.11.4160:mRNA-p1	Tb927.11.4160:mRNA-p1	predicted C2 domain protein	24	21.1	136.31	1235	1235	-0.00277494	0.564213	1991	2829	0.506799	predicted C2 domain protein
Tb927.4.980:mRNA-p1	Tb927.4.980:mRNA-p1	actin, putative	2	7.3	40.429	372	372	-0.00277494	0.563947	1992	4278	1.10272	actin, putative
Tb11.v5.0480.1-p1;Tb927.10.15370:mRNA-p1	Tb11.v5.0480.1-p1;Tb927.10.15370:mRNA-p1	DNA-directed RNA polymerase, alpha subunit, putative	13;12	54.3	37.329	337	337;337	-0.00277494	0.563389	1993	1583	-0.33228	DNA-directed RNA polymerase, alpha subunit, putative
Tb927.3.2900:mRNA-p1	Tb927.3.2900:mRNA-p1	eukaryotic translation initiation factor 2 subunit alpha	9	21.5	46.824	418	418	-0.00277494	0.56298	1994	780	-1.35412	eukaryotic translation initiation factor 2 subunit alpha
Tb927.5.4290:mRNA-p1	Tb927.5.4290:mRNA-p1	hypothetical protein, conserved	5	18.6	40.083	361	361	-0.00277494	0.562426	1995	6205	1.63704	hypothetical protein, conserved
Tb927.9.9060:mRNA-p1	Tb927.9.9060:mRNA-p1	Lsm12 protein, putative	13	54.7	21.06	190	190	-0.00277494	0.562254	1996	815	-1.29224	Lsm12 protein, putative
Tb927.1.3230:mRNA-p1	Tb927.1.3230:mRNA-p1	cell division cycle protein, putative	4	6	77.314	715	715	-0.00277494	0.562188	1997	6085	1.60742	cell division cycle protein, putative
[truncated: 1,043 more rows]
